# Supplementary material for: The cerebellum computes frequency dynamics for motions with numerical precision and cross-individual uniformity
Source: Research Square preprint supplement (doi:10.21203/rs.3.rs-4615547/v1), 2024-07-30
Supplement: Supplementary file 1 [file 4997cbf0f7d443f7e39948d1.xlsx]

## Sheet: Fig1I, J
Fig1I									Fig1J
CB x Motion									CB x ACC
Baseline	8Hz	12Hz	16Hz	20Hz	15Hz	10Hz			Baseline	8Hz	12Hz	16Hz	20Hz	15Hz	10Hz
514.722	1081.24	2015.21	2779.18	2541.16	3062.04	1314.51			518.637	641.446	759.313	660.978	607.531	809.762	682.372
568.618	1224.51	1892.38	2080.02	3343.29	1990.28	1141.05			609.465	837.519	776.236	1005.2	832.164	765.622	764.086
924.996	6449.73	3244.1	5092.77	6303.22	3737.55	2765.54			1165.95	4195.72	1922.35	1750.33	1458.24	1157.31	1873.83
1363.58	2674	3319.93	3343	6065.35	5148.74	1931.15			1477.91	1162.83	935.927	1388.92	1744.8	1172.16	1245.33
1232.51	1475.23	1205.72	3056.44	2892.16	5158.76	1673.95			1169.48	873.872	756.074	887.633	588.329	1640.82	991.609
1145.18	1216.23	1941.85	3507.97	4155.72	3112.61	1236.9			1023.28	848.758	1246.98	1347.15	1429.89	1269.76	908.529
Table Analyzed	Motion x CB Xcorr								Table Analyzed	ACC x CB Xcorr
Friedman test									Friedman test
P value	0.0001								P value	0.8604
Exact or approximate P value?	Approximate								Exact or approximate P value?	Approximate
P value summary	***								P value summary	ns
Are means signif. different? (P < 0.05)	Yes								Are means signif. different? (P < 0.05)	No
Number of groups	7								Number of groups	7
Friedman statistic	26.93								Friedman statistic	2.571
Data summary									Data summary
Number of treatments (columns)	7								Number of treatments (columns)	7
Number of subjects (rows)	6								Number of subjects (rows)	6
Multiple comparison									Multiple comparison
Number of families	1								Number of families	1
Number of comparisons per family	21								Number of comparisons per family	21
Alpha	0.05								Alpha	0.05
Dunn's multiple comparisons test	Rank sum diff.	Significant?	Summary	Adjusted P Value					Dunn's multiple comparisons test	Rank sum diff.	Significant?	Summary	Adjusted P Value
Baseline vs. 8Hz	-13	No	ns	>0.9999	A-B				Baseline vs. 8Hz	-3	No	ns	>0.9999	A-B
Baseline vs. 12Hz	-13	No	ns	>0.9999	A-C				Baseline vs. 12Hz	-4	No	ns	>0.9999	A-C
Baseline vs. 16Hz	-27	Yes	**	0.0065	A-D				Baseline vs. 16Hz	-11	No	ns	>0.9999	A-D
Baseline vs. 20Hz	-30	Yes	**	0.0013	A-E				Baseline vs. 20Hz	-6	No	ns	>0.9999	A-E
Baseline vs. 15Hz	-27	Yes	**	0.0065	A-F				Baseline vs. 15Hz	-7	No	ns	>0.9999	A-F
Baseline vs. 10Hz	-9	No	ns	>0.9999	A-G				Baseline vs. 10Hz	-4	No	ns	>0.9999	A-G
8Hz vs. 12Hz	0	No	ns	>0.9999	B-C				8Hz vs. 12Hz	-1	No	ns	>0.9999	B-C
8Hz vs. 16Hz	-14	No	ns	>0.9999	B-D				8Hz vs. 16Hz	-8	No	ns	>0.9999	B-D
8Hz vs. 20Hz	-17	No	ns	0.4852	B-E				8Hz vs. 20Hz	-3	No	ns	>0.9999	B-E
8Hz vs. 15Hz	-14	No	ns	>0.9999	B-F				8Hz vs. 15Hz	-4	No	ns	>0.9999	B-F
8Hz vs. 10Hz	4	No	ns	>0.9999	B-G				8Hz vs. 10Hz	-1	No	ns	>0.9999	B-G
12Hz vs. 16Hz	-14	No	ns	>0.9999	C-D				12Hz vs. 16Hz	-7	No	ns	>0.9999	C-D
12Hz vs. 20Hz	-17	No	ns	0.4852	C-E				12Hz vs. 20Hz	-2	No	ns	>0.9999	C-E
12Hz vs. 15Hz	-14	No	ns	>0.9999	C-F				12Hz vs. 15Hz	-3	No	ns	>0.9999	C-F
12Hz vs. 10Hz	4	No	ns	>0.9999	C-G				12Hz vs. 10Hz	0	No	ns	>0.9999	C-G
16Hz vs. 20Hz	-3	No	ns	>0.9999	D-E				16Hz vs. 20Hz	5	No	ns	>0.9999	D-E
16Hz vs. 15Hz	0	No	ns	>0.9999	D-F				16Hz vs. 15Hz	4	No	ns	>0.9999	D-F
16Hz vs. 10Hz	18	No	ns	0.3393	D-G				16Hz vs. 10Hz	7	No	ns	>0.9999	D-G
20Hz vs. 15Hz	3	No	ns	>0.9999	E-F				20Hz vs. 15Hz	-1	No	ns	>0.9999	E-F
20Hz vs. 10Hz	21	No	ns	0.1053	E-G				20Hz vs. 10Hz	2	No	ns	>0.9999	E-G
15Hz vs. 10Hz	18	No	ns	0.3393	F-G				15Hz vs. 10Hz	3	No	ns	>0.9999	F-G
Test details	Rank sum 1	Rank sum 2	Rank sum diff.	n1	n2				Test details	Rank sum 1	Rank sum 2	Rank sum diff.	n1	n2
Baseline vs. 8Hz	7	20	-13	6	6				Baseline vs. 8Hz	19	22	-3	6	6
Baseline vs. 12Hz	7	20	-13	6	6				Baseline vs. 12Hz	19	23	-4	6	6
Baseline vs. 16Hz	7	34	-27	6	6				Baseline vs. 16Hz	19	30	-11	6	6
Baseline vs. 20Hz	7	37	-30	6	6				Baseline vs. 20Hz	19	25	-6	6	6
Baseline vs. 15Hz	7	34	-27	6	6				Baseline vs. 15Hz	19	26	-7	6	6
Baseline vs. 10Hz	7	16	-9	6	6				Baseline vs. 10Hz	19	23	-4	6	6
8Hz vs. 12Hz	20	20	0	6	6				8Hz vs. 12Hz	22	23	-1	6	6
8Hz vs. 16Hz	20	34	-14	6	6				8Hz vs. 16Hz	22	30	-8	6	6
8Hz vs. 20Hz	20	37	-17	6	6				8Hz vs. 20Hz	22	25	-3	6	6
8Hz vs. 15Hz	20	34	-14	6	6				8Hz vs. 15Hz	22	26	-4	6	6
8Hz vs. 10Hz	20	16	4	6	6				8Hz vs. 10Hz	22	23	-1	6	6
12Hz vs. 16Hz	20	34	-14	6	6				12Hz vs. 16Hz	23	30	-7	6	6
12Hz vs. 20Hz	20	37	-17	6	6				12Hz vs. 20Hz	23	25	-2	6	6
12Hz vs. 15Hz	20	34	-14	6	6				12Hz vs. 15Hz	23	26	-3	6	6
12Hz vs. 10Hz	20	16	4	6	6				12Hz vs. 10Hz	23	23	0	6	6
16Hz vs. 20Hz	34	37	-3	6	6				16Hz vs. 20Hz	30	25	5	6	6
16Hz vs. 15Hz	34	34	0	6	6				16Hz vs. 15Hz	30	26	4	6	6
16Hz vs. 10Hz	34	16	18	6	6				16Hz vs. 10Hz	30	23	7	6	6
20Hz vs. 15Hz	37	34	3	6	6				20Hz vs. 15Hz	25	26	-1	6	6
20Hz vs. 10Hz	37	16	21	6	6				20Hz vs. 10Hz	25	23	2	6	6
15Hz vs. 10Hz	34	16	18	6	6				15Hz vs. 10Hz	26	23	3	6	6

## Sheet: Fig2 C,D, E, F, G, H, I, J,K
Fig2C									Fig2D								Fig2E				Fig2F				Fig2G																			Fig2H
Cerebellar Peak Amplitude									Motion Peak Amplitude								Whole period Peak Amplitude				Whole period Peak Frequency				Second-by-second Peak Amplitude (Individual)																			Second-by-second Peak Frequency (Individual)
																									Mouse 1			Mouse 2			Mouse 3			Mouse 4			Mouse 5			Mouse 6				Mouse 1			Mouse 2
																	CB	Motion			CB	Motion			CB	Motion		CB	Motion		CB	Motion		CB	Motion		CB	Motion		CB	Motion			CB	Motion		CB	Motion
Baseline	8 Hz	12 Hz	16 Hz	20 Hz	15 Hz	10 Hz			Baseline	8 Hz	12 Hz	16 Hz	20 Hz	15 Hz	10 Hz		6.57454	0.00091208			8	8			7.31668	0.00089557		6.67199	0.00151731		2.43037	0.000239914		8.0417	0.00170851		1587.18	0.00101845		2062.68	0.000577004			8	8		8	8
8.3857e-05	6.57454	6.45969	3.69214	3.05238	4.61405	4.78044			3.95964e-05	0.000912	0.004851	0.011953	0.026812	0.008908	0.002145		6.45969	0.00485141			12	12			6.85142	0.000813277		6.55834	0.00150546		3.23061	0.000322392		8.03343	0.00175919		1700.69	0.000982704		1828.93	0.000541617			8	8		8	8
0.000148079	5.78965	4.27674	4.66484	5.8543	3.36545	3.67118			7.46753e-05	0.001274	0.004016	0.011095	0.028086	0.007939	0.002178		3.69214	0.0119527			16	16			6.5729	0.000754988		6.55497	0.00151237		4.24979	0.000399096		8.52816	0.00173428		1735.29	0.000967084		1727.71	0.000563904			8	8		8	8
1.2581	5.92948	3.28494	5.4443	5.20592	2.52418	2.95904			5.60367e-05	0.000582	0.001751	0.005832	0.019764	0.004065	0.00072		3.05238	0.0268116			20	20			6.79216	0.000764646		6.28345	0.00150712		4.44409	0.000442154		8.66583	0.00176275		1777.82	0.00096141		1682.92	0.000543626			8	8		8	8
2.63367	14.8599	10.5155	5.80379	8.5597	9.22936	6.99699			0.000168487	0.001172	0.003745	0.012083	0.031316	0.008288	0.003291		4.61405	0.00890795			15	15			6.85719	0.000749573		5.4933	0.00150808		4.61568	0.000458214		9.26668	0.00176418		1630.89	0.000965756		1717.77	0.000563053			8	8		8	8
0.000195375	6.1541	3.40435	6.19329	2.95202	7.32256	4.4715			0.000103307	0.001624	0.003842	0.012572	0.026026	0.007622	0.001881		4.78044	0.00214514			10	10			7.1538	0.00077216		5.82176	0.00138799		4.96832	0.0004913		9.13969	0.00175563		1629.82	0.000947603		1884.49	0.000521052			8	8		8	8
1.58356	4.81552	3.22551	7.00137	5.69698	5.63347	3.84656			9.96605e-05	0.001051	0.004121	0.011494	0.027425	0.008996	0.00206		5.78965	0.00127353			8	8			7.32144	0.000788807		5.72963	0.00127126		4.92275	0.000514094		9.31553	0.00176524		1643.46	0.00093553		1753.65	0.000516885			8	8		8	8
																	4.27674	0.00401642			12	12			7.35608	0.000800595		5.26861	0.00111838		5.02093	0.000533466		9.93185	0.00167155		1634.86	0.000897673		2343.3	0.000519148			8	8		8	8
																	4.66484	0.011095			16	16			7.37008	0.000868239		5.03116	0.000960027		5.41147	0.000559507		11.3793	0.00158965		1609.94	0.000825227		2768.04	0.000529758			8	8		8	8
																	5.8543	0.0280857			20	20			7.67173	0.000898361		5.23951	0.00103978		5.95487	0.00059028		11.8519	0.00150922		1560.84	0.000752691		2936.81	0.000553916			8	8		8	8
Table Analyzed	CB LFP Peak Amp								Table Analyzed	Motion Peak Amp							3.36545	0.00793885			15	15			8.19905	0.000931601		5.14156	0.00125139		6.1253	0.000611522		11.2887	0.0015646		1500.57	0.000738622		3101.8	0.000666682			8	8		8	8
																	3.67118	0.00217807			10	10			7.78975	0.000966348		4.65606	0.0012436		6.33614	0.000637964		10.7225	0.00165121		1437.48	0.000698581		3115.62	0.000735432			8	8		8	8
Friedman test									Friedman test								5.92948	0.000582458			8	8			7.49217	0.000973583		4.82344	0.00116461		6.53078	0.000660681		10.527	0.00174099		1385.51	0.00068538		3249.69	0.000789036			8	8		8	8
P value	0.0059								P value	<0.0001							3.28494	0.00175087			12	12			6.59729	0.000938212		5.09432	0.00118655		6.90085	0.000678715		10.5612	0.00176788		1368.53	0.000661497		3464.49	0.000795145			8	8		8	8
Exact or approximate P value?	Approximate								Exact or approximate P value?	Approximate							5.4443	0.0058318			16	16			6.14516	0.000987162		5.45405	0.00113593		7.00828	0.000698221		10.6813	0.00175491		1359.26	0.000675569		3485.92	0.000822809			8	8		8	8
P value summary	**								P value summary	****							5.20592	0.0197636			20	20			6.15977	0.000996065		5.97448	0.00117176		7.31099	0.000708193		12.0161	0.00170768		1432.22	0.00067608		3639	0.000814653			8	8		8	8
Are means signif. different? (P < 0.05)	Yes								Are means signif. different? (P < 0.05)	Yes							2.52418	0.0040653			15	15			6.36444	0.000956669		6.02862	0.00120973		7.51993	0.000706844		13.2723	0.00157005		1585.29	0.000656534		3712.4	0.000828066			8	8		8	8
Number of groups	7								Number of groups	7							2.95904	0.000720261			10	10			6.48377	0.000953107		6.84373	0.0013017		7.20517	0.000691028		13.9244	0.00153843		1656.49	0.000693555		3734.89	0.000852347			8	8		8	8
Friedman statistic	18.14								Friedman statistic	36							14.8599	0.00117165			8	8			6.36589	0.000962457		7.3305	0.00139627		7.22178	0.000693868		13.6514	0.00152881		1665.15	0.000677731		3809.05	0.000866902			8	8		8	8
																	10.5155	0.00374466			12	12			6.24231	0.000925795		7.10068	0.0014434		7.67787	0.000724907		13.2197	0.00153947		1676.38	0.000686059		3831.11	0.000901378			8	8		8	8
Data summary									Data summary								5.80379	0.0120825			16	16			5.79543	0.000910533		6.70306	0.00142807		7.15807	0.000683964		13.7303	0.00147804		1637.59	0.00068441		3841.09	0.000965325			8	8		8	8
Number of treatments (columns)	7								Number of treatments (columns)	7							8.5597	0.0313159			20	20			5.92372	0.000891671		6.80865	0.00144696		6.83916	0.000630009		13.6065	0.0014432		1551.42	0.000710919		3902.41	0.00103342			8	8		8	8
Number of subjects (rows)	6								Number of subjects (rows)	6							9.22936	0.00828844			15	15			5.74333	0.000937111		6.62098	0.00143602		6.35339	0.000604136		13.0031	0.00142436		1545.86	0.000726935		3855.35	0.00102193			8	8		8	8
																	6.99699	0.00329141			10	10			5.81262	0.000941814		6.48608	0.0014495		6.59547	0.000614275		12.9382	0.00139822		1565.32	0.000728746		3804.82	0.00106073			8	8		8	8
																	6.1541	0.00162425			8	8			6.20267	0.00094033		6.81052	0.00149953		6.48841	0.000617885		12.9215	0.00137465		1557.5	0.000720531		3713.36	0.00121552			8	8		8	8
Multiple comparison									Multiple comparison								3.40435	0.00384231			12	12			6.12182	0.000932859		6.89864	0.0015145		6.43276	0.00061361		12.919	0.00133768		1646.62	0.000737287		3473.83	0.00129678			8	8		8	8
Number of families	1								Number of families	1							6.19329	0.0125721			16	16			6.11349	0.00091918		7.08502	0.00149778		6.69728	0.000632754		12.3779	0.0013139		1664.62	0.000726207		3430	0.00134277			8	8		8	8
Number of comparisons per family	21								Number of comparisons per family	21							2.95202	0.026026			20	20			6.20213	0.000893637		7.46731	0.00146896		6.53191	0.000631396		11.6166	0.00134073		1630.01	0.000699956		2619.19	0.00141045			8	8		8	8
Alpha	0.05								Alpha	0.05							7.32256	0.00762151			15	15			6.38409	0.000875457		7.70808	0.00145132		6.25649	0.000630977		12.7869	0.00134833		1777.48	0.000699349		2263.92	0.00145063			8	8		8	8
																	4.4715	0.00188082			10	10			5.62053	0.000889415		7.46085	0.00120911		6.13223	0.000641493		16.2954	0.00131441		1826.56	0.000684196		1978.4	0.00147108			8	8		8	8
Dunn's multiple comparisons test	Rank sum diff.	Significant?	Summary	Adjusted P Value					Dunn's multiple comparisons test	Rank sum diff.	Significant?	Summary	Adjusted P Value				4.81552	0.00105087			8	8			5.49625	0.000848012		7.33829	0.00117405		6.24366	0.000646104		16.8189	0.00125081		1905.05	0.000650961		1910.42	0.00148739			8	8		8	8
Baseline vs. 8 Hz	-30	Yes	**	0.0013	A-B				Baseline vs. 8 Hz	-6	No	ns	>0.9999	A-B			3.22551	0.00412118			12	12			6.0151	0.000850289		7.25469	0.00125704		6.14068	0.000646603		17.2559	0.00116277		1907.88	0.000661092		1935.58	0.00142431			8	8		8	8
Baseline vs. 12 Hz	-19	No	ns	0.2335	A-C				Baseline vs. 12 Hz	-18	No	ns	0.3393	A-C			7.00137	0.011494			16	16			6.03071	0.00087459		6.89915	0.00126042		5.85923	0.000647708		17.5905	0.00107869		2048.13	0.000689291		1739.78	0.00137368			8	8		8	8
Baseline vs. 16 Hz	-23	Yes	*	0.0444	A-D				Baseline vs. 16 Hz	-30	Yes	**	0.0013	A-D			5.69698	0.0274246			20	20			6.19214	0.000932182		6.56919	0.00132267		6.17226	0.000648617		18.5591	0.00101919		2322.31	0.000768576		1581.08	0.0013728			8	8		8	8
Baseline vs. 20 Hz	-20	No	ns	0.1581	A-E				Baseline vs. 20 Hz	-36	Yes	****	<0.0001	A-E			5.63347	0.00899573			15	15			6.31588	0.000888878		6.32238	0.00140068		6.21803	0.000640931		18.9176	0.000993826		2420.5	0.000796085		1535.74	0.00134172			8	8		8	8
Baseline vs. 15 Hz	-19	No	ns	0.2335	A-F				Baseline vs. 15 Hz	-24	Yes	*	0.0282	A-F			3.84656	0.00206002			10	10			6.75576	0.000905513		5.80501	0.00136166		6.08836	0.000625813		17.2815	0.00100355		2274.55	0.000880007		1369.34	0.00130451			8	8		8	8
Baseline vs. 10 Hz	-15	No	ns	0.9454	A-G				Baseline vs. 10 Hz	-12	No	ns	>0.9999	A-G											6.81509	0.000953704		5.51451	0.00134019		6.1356	0.000617976		17.2193	0.000989911		2179.95	0.00101065		1371.25	0.00129275			8	8		6	8
8 Hz vs. 12 Hz	11	No	ns	>0.9999	B-C				8 Hz vs. 12 Hz	-12	No	ns	>0.9999	B-C											6.48311	0.000933602		6.24277	0.00127384		6.47477	0.000628892		18.0278	0.000997291		2099.91	0.00112362		1333.22	0.00130034			8	8		6	8
8 Hz vs. 16 Hz	7	No	ns	>0.9999	B-D				8 Hz vs. 16 Hz	-24	Yes	*	0.0282	B-D											6.58544	0.000958705		6.11925	0.0012099		6.26503	0.000611495		18.9968	0.000916193		2010.43	0.00121115		1436.91	0.00128748			8	8		6	8
8 Hz vs. 20 Hz	10	No	ns	>0.9999	B-E				8 Hz vs. 20 Hz	-30	Yes	**	0.0013	B-E											6.58794	0.00101314		6.07793	0.00121684		6.54389	0.000619544		21.0974	0.000835158		1985.24	0.00125919		1567.49	0.00126287			8	8		6	8
8 Hz vs. 15 Hz	11	No	ns	>0.9999	B-F				8 Hz vs. 15 Hz	-18	No	ns	0.3393	B-F											7.55587	0.00106903		6.72318	0.0012414		6.13385	0.000609489		21.9017	0.000769969		1928.35	0.00133139		1690.4	0.00118785			7	8		6	8
8 Hz vs. 10 Hz	15	No	ns	0.9454	B-G				8 Hz vs. 10 Hz	-6	No	ns	>0.9999	B-G											7.87122	0.00106389		6.74549	0.00128237		6.19626	0.000607828		22.4379	0.000719754		1941.47	0.00138117		1698.26	0.00117744			7	8		6	8
12 Hz vs. 16 Hz	-4	No	ns	>0.9999	C-D				12 Hz vs. 16 Hz	-12	No	ns	>0.9999	C-D											8.37008	0.00100034		7.11253	0.00130722		5.80582	0.000588368		22.3051	0.000681453		1877.47	0.0014631		1932.27	0.00112887			7	8		6	8
12 Hz vs. 20 Hz	-1	No	ns	>0.9999	C-E				12 Hz vs. 20 Hz	-18	No	ns	0.3393	C-E											8.39802	0.000937531		6.5314	0.00130015		5.71771	0.000573108		22.3397	0.000657109		1876.37	0.00158684		2153.31	0.000996168			7	8		6	8
12 Hz vs. 15 Hz	0	No	ns	>0.9999	C-F				12 Hz vs. 15 Hz	-6	No	ns	>0.9999	C-F											7.24276	0.000928136		6.62706	0.00132903		5.76534	0.000551767		22.411	0.000632408		1810.18	0.00174964		2474.26	0.000897972			7	8		6	8
12 Hz vs. 10 Hz	4	No	ns	>0.9999	C-G				12 Hz vs. 10 Hz	6	No	ns	>0.9999	C-G											7.48187	0.000914157		6.66334	0.00135045		5.51092	0.000532679		22.8757	0.000613219		1673.64	0.00180581		2685.28	0.00084865			7	8		6	8
16 Hz vs. 20 Hz	3	No	ns	>0.9999	D-E				16 Hz vs. 20 Hz	-6	No	ns	>0.9999	D-E											7.76048	0.000908378		6.67762	0.00132992		5.83303	0.000545655		23.1683	0.000593573		1619.58	0.00180433		2795.9	0.000767602			7	8		6	8
16 Hz vs. 15 Hz	4	No	ns	>0.9999	D-F				16 Hz vs. 15 Hz	6	No	ns	>0.9999	D-F											7.7811	0.000939504		5.6991	0.00133399		6.56255	0.000574536		21.6806	0.000633073		1483.93	0.00182232		3045.6	0.000751137			7	8		6	8
16 Hz vs. 10 Hz	8	No	ns	>0.9999	D-G				16 Hz vs. 10 Hz	18	No	ns	0.3393	D-G											7.56178	0.000887056		5.69012	0.00132084		6.31269	0.000565277		17.6813	0.000614954		1267.47	0.00193853		3519.4	0.000686215			7	8		6	8
20 Hz vs. 15 Hz	1	No	ns	>0.9999	E-F				20 Hz vs. 15 Hz	12	No	ns	>0.9999	E-F											8.04514	0.0008991		5.55788	0.00131151		6.18199	0.0005663		16.775	0.000586887		1158.95	0.00201045		3871.73	0.000583289			7	8		6	8
20 Hz vs. 10 Hz	5	No	ns	>0.9999	E-G				20 Hz vs. 10 Hz	24	Yes	*	0.0282	E-G											7.83214	0.000928709		5.4656	0.00124703		6.21824	0.000571743		17.171	0.000573104		1102.49	0.0020496		4080.58	0.00058805			7	8		6	8
15 Hz vs. 10 Hz	4	No	ns	>0.9999	F-G				15 Hz vs. 10 Hz	12	No	ns	>0.9999	F-G											8.04215	0.000930052		5.56389	0.00120598		6.15984	0.000553292		16.9709	0.000581488		1004.61	0.00200853		4067.92	0.000584027			7	8		6	8
																									8.46852	0.0009263		5.62556	0.0011502		5.85298	0.00055241		16.2716	0.000587847		809.44	0.00195092		4069.55	0.000638644			7	8		6	8
Test details	Rank sum 1	Rank sum 2	Rank sum diff.	n1	n2				Test details	Rank sum 1	Rank sum 2	Rank sum diff.	n1	n2											8.45891	0.000982064		5.87197	0.00107561		5.4563	0.000544535		16.1703	0.000627373		599.993	0.00189895		4241.95	0.000632045			7	8		6	8
Baseline vs. 8 Hz	6	36	-30	6	6				Baseline vs. 8 Hz	6	12	-6	6	6											8.26488	0.000982166		5.67531	0.000981537		5.5102	0.000546498		14.6425	0.000611636		518.295	0.00181584		4323.04	0.000637859			7	8		6	8
Baseline vs. 12 Hz	6	25	-19	6	6				Baseline vs. 12 Hz	6	24	-18	6	6											8.30311	0.000933385		5.86971	0.000934805		5.54289	0.000540964		15.7432	0.000613707		497.681	0.00169512		4344.62	0.000635635			7	8		6	8
Baseline vs. 16 Hz	6	29	-23	6	6				Baseline vs. 16 Hz	6	36	-30	6	6											8.54619	0.000907355		5.78743	0.000905086		5.28882	0.00052102		15.7408	0.000600545		483.504	0.00148791		5175.26	0.000614245			7	8		8	8
Baseline vs. 20 Hz	6	26	-20	6	6				Baseline vs. 20 Hz	6	42	-36	6	6											8.54252	0.0008877		5.35112	0.000908081		4.71534	0.00049211		14.335	0.000647725		460.259	0.00136342		5041.57	0.000602848			7	8		8	8
Baseline vs. 15 Hz	6	25	-19	6	6				Baseline vs. 15 Hz	6	30	-24	6	6											8.41081	0.000860929		11.8891	0.00092377		4.38374	0.000473148		12.6849	0.000697166		452.343	0.00125952		4920.39	0.000589636			7	8		6	8
Baseline vs. 10 Hz	6	21	-15	6	6				Baseline vs. 10 Hz	6	18	-12	6	6											7.87722	0.00085119		11.25	0.000921268		3.90756	0.0004402		10.3081	0.000850669		440.641	0.00119012		4688.25	0.000584501			7	8		6	8
8 Hz vs. 12 Hz	36	25	11	6	6				8 Hz vs. 12 Hz	12	24	-12	6	6											3.29888	0.00513677		5.64503	0.00400959		2.37617	0.00151919		10.3816	0.00425606		1203.86	0.00362566		5431.75	0.00372729			12	12		12	12
8 Hz vs. 16 Hz	36	29	7	6	6				8 Hz vs. 16 Hz	12	36	-24	6	6											3.73877	0.00499738		5.72341	0.00421936		2.41856	0.00154434		11.1378	0.00417739		1084.94	0.0036241		5347.37	0.00365368			12	12		12	12
8 Hz vs. 20 Hz	36	26	10	6	6				8 Hz vs. 20 Hz	12	42	-30	6	6											3.92876	0.00479188		6.56094	0.00423027		2.4126	0.00153979		11.7242	0.00413102		1005.68	0.00367341		5432.29	0.00358143			12	12		12	12
8 Hz vs. 15 Hz	36	25	11	6	6				8 Hz vs. 15 Hz	12	30	-18	6	6											4.22081	0.00463806		6.55978	0.00416993		2.46866	0.00152947		11.9848	0.00417123		974.056	0.00363939		5844.65	0.00387372			12	12		12	12
8 Hz vs. 10 Hz	36	21	15	6	6				8 Hz vs. 10 Hz	12	18	-6	6	6											4.2095	0.00466912		5.95891	0.00413814		2.55856	0.00154837		12.3389	0.00419976		1083.34	0.00361011		5830.33	0.00400948			12	12		12	12
12 Hz vs. 16 Hz	25	29	-4	6	6				12 Hz vs. 16 Hz	24	36	-12	6	6											4.33174	0.00469958		5.83003	0.00403556		2.51636	0.00156722		12.8235	0.00415474		1219.26	0.00377251		6089.93	0.00396017			12	12		12	12
12 Hz vs. 20 Hz	25	26	-1	6	6				12 Hz vs. 20 Hz	24	42	-18	6	6											4.92947	0.00476511		5.76604	0.0039215		2.52982	0.00156757		12.8127	0.00415707		1306.41	0.00387383		6404.67	0.0039106			12	12		12	12
12 Hz vs. 15 Hz	25	25	0	6	6				12 Hz vs. 15 Hz	24	30	-6	6	6											4.96514	0.00480704		5.93915	0.00386682		2.55636	0.00159908		12.875	0.00417806		1305.43	0.0038901		6293.35	0.00389715			12	12		12	12
12 Hz vs. 10 Hz	25	21	4	6	6				12 Hz vs. 10 Hz	24	18	6	6	6											5.40941	0.00477813		6.00428	0.00379172		2.89854	0.00159997		13.294	0.00418717		1422.82	0.00392907		6122.72	0.0040713			12	12		12	12
16 Hz vs. 20 Hz	29	26	3	6	6				16 Hz vs. 20 Hz	36	42	-6	6	6											6.47025	0.00460754		5.84864	0.00376486		2.94644	0.00170437		13.0973	0.00410177		1386.99	0.00387681		6376.56	0.00408487			12	12		12	12
16 Hz vs. 15 Hz	29	25	4	6	6				16 Hz vs. 15 Hz	36	30	6	6	6											6.94877	0.00429868		5.29633	0.00381449		3.13652	0.00174062		12.3077	0.0040593		1397.43	0.00382658		6530.77	0.00409744			12	12		12	12
16 Hz vs. 10 Hz	29	21	8	6	6				16 Hz vs. 10 Hz	36	18	18	6	6											7.05288	0.00403366		5.20555	0.00377909		2.94844	0.00172455		12.9793	0.00402287		1388.45	0.00380895		6782.96	0.00409452			12	12		12	12
20 Hz vs. 15 Hz	26	25	1	6	6				20 Hz vs. 15 Hz	42	30	12	6	6											7.06938	0.00400664		4.55315	0.00367742		2.98896	0.00169581		12.6297	0.00390201		1391.3	0.00385877		6829.01	0.00410694			12	12		12	12
20 Hz vs. 10 Hz	26	21	5	6	6				20 Hz vs. 10 Hz	42	18	24	6	6											7.06952	0.00404705		4.46813	0.00359955		2.78271	0.00167385		12.3207	0.00384889		1393.01	0.00399268		6823.45	0.00413589			12	12		12	12
15 Hz vs. 10 Hz	25	21	4	6	6				15 Hz vs. 10 Hz	30	18	12	6	6											7.12591	0.00406396		4.54916	0.00359834		2.71535	0.00165846		11.4386	0.00388284		1390.42	0.00404682		6367.28	0.00413062			12	12		12	12
																									7.39646	0.00416409		4.60563	0.00361991		2.61311	0.00166049		11.7488	0.00393972		1356.06	0.00412193		5150.69	0.00418271			12	12		12	12
																									7.68777	0.0042398		4.79103	0.00364271		2.59886	0.00167347		11.4907	0.00394827		1319.89	0.00412036		4779.99	0.00424836			12	12		12	12
																									7.69364	0.00443162		4.59661	0.00367283		2.54796	0.00174177		11.8499	0.00391412		1304.9	0.00416092		4194.32	0.0042535			12	12		12	12
																									7.84378	0.00457218		4.64991	0.00372902		2.4204	0.00173981		12.096	0.00396874		1334.08	0.00407396		4095.17	0.00427695			12	12		12	12
																									7.88732	0.00461375		4.6208	0.00375289		2.22618	0.00170801		13.0051	0.00396873		1358.14	0.00408544		3642.69	0.00426962			12	12		12	12
																									7.84369	0.00464836		4.55276	0.00370761		2.12887	0.0016791		13.6628	0.00391629		1388.35	0.00414937		3077.97	0.00428413			12	12		12	12
																									8.05516	0.00463527		4.11702	0.00374716		2.33385	0.00170713		13.1892	0.00393		1431.66	0.00408083		3026.23	0.00429414			12	12		12	12
																									8.07607	0.00462168		3.3836	0.00390777		2.40745	0.00175461		12.7688	0.00391175		1592.98	0.00414343		2817.63	0.00417113			12	12		12	12
																									8.69792	0.00459931		3.58176	0.00399195		2.37276	0.00176597		12.8405	0.00394666		1691.96	0.00429614		2535.92	0.00393081			12	12		12	12
																									8.73359	0.00449618		3.87796	0.00413435		2.29707	0.00173613		11.9997	0.00392613		1730.51	0.00425733		2589.95	0.00392012			12	12		12	12
																									8.40597	0.0044056		3.89762	0.00419601		2.27471	0.0017405		12.2061	0.00389538		2150.93	0.00411741		2161.6	0.00394142			12	12		12	12
																									8.09619	0.00443967		4.02707	0.00427877		2.75352	0.0017513		12.1963	0.00387921		2358.8	0.0041426		1917.45	0.00392827			12	12		12	12
																									7.8141	0.00468428		4.10454	0.0043445		2.94885	0.00177217		12.8221	0.00386308		2551.55	0.00418234		1641.45	0.00384437			12	12		12	12
																									7.15877	0.00471566		3.9919	0.00443384		2.99064	0.00179166		12.4359	0.00392175		2623.9	0.0042663		1493.52	0.00378831			12	12		12	12
																									6.28636	0.00473894		4.16765	0.004423		2.85159	0.00169829		12.7258	0.00392251		2764.99	0.00430494		1277.54	0.00383245			12	12		12	12
																									6.50885	0.00478111		3.72124	0.00435339		2.81744	0.00169096		14.2904	0.00389776		2815.7	0.00431671		1157.26	0.00382021			12	12		12	12
																									6.60404	0.00492007		3.45503	0.0043173		2.85651	0.00170926		13.6433	0.00395801		2902.43	0.00428071		1008.47	0.00395959			12	12		12	12
																									6.62058	0.00508473		3.46772	0.00428033		3.05445	0.00179363		13.3964	0.0039108		2904.01	0.00426365		1066.35	0.00416455			12	12		12	12
																									7.00116	0.00524176		3.57636	0.00421684		3.69336	0.0019143		12.645	0.00388589		2859.52	0.00419135		1083.95	0.004258			12	12		12	12
																									7.12286	0.00545304		3.64983	0.00411767		4.09596	0.00196096		12.1878	0.0037797		2833.75	0.00407037		1097.14	0.00432623			12	12		12	12
																									6.52642	0.00548999		3.51326	0.0040425		4.25263	0.00197324		11.993	0.0036811		2826.93	0.00398555		1199.13	0.00427966			12	12		12	12
																									6.74943	0.00542762		3.62588	0.00407146		4.35864	0.00197737		11.883	0.00361361		2830.02	0.00395861		1266.52	0.00417931			12	12		12	12
																									7.09345	0.00522984		3.82464	0.00397561		4.31347	0.00195509		11.6922	0.00369683		2788.55	0.00399074		1283.44	0.0042148			12	12		12	12
																									6.68727	0.00522938		3.9764	0.00396683		4.2412	0.00195567		11.0248	0.00367013		2761.14	0.00405167		1259.92	0.00428049			12	12		12	12
																									6.5699	0.00533945		3.79302	0.00401789		4.11092	0.00202737		9.5365	0.003707		2764.65	0.00401337		1288.69	0.00423348			12	12		12	12
																									5.88693	0.00528044		3.77249	0.00404584		4.26509	0.00205961		8.77306	0.0036416		2885.99	0.0040382		1362.92	0.00431331			12	12		12	12
																									6.20737	0.00546477		3.8632	0.00402472		4.15468	0.00205878		8.64757	0.00358226		2761.43	0.00399212		1291.05	0.00429629			12	12		12	12
																									5.70112	0.00549385		3.91216	0.00396181		4.34097	0.0020619		8.55406	0.00354342		2509.39	0.00385965		1627.25	0.00432698			12	12		12	12
																									5.58642	0.00558423		3.75363	0.00390257		4.62843	0.00206688		8.77857	0.00348433		2362.22	0.0037839		1733.69	0.00443797			12	12		12	12
																									6.20528	0.00563952		3.52189	0.00395669		4.68562	0.00204282		8.83498	0.0034578		1916.36	0.00377161		1674.3	0.00449061			12	12		12	12
																									6.59301	0.00558479		3.60702	0.00393249		4.95833	0.0020585		8.65921	0.00343964		1553.79	0.00369571		1689.42	0.00456108			12	12		12	12
																									6.46837	0.00533185		3.58195	0.00395895		4.86861	0.00200427		8.51825	0.00343899		1312.35	0.00373018		1693.21	0.0045365			12	12		12	12
																									6.73167	0.0051536		3.26441	0.00388549		4.48132	0.00198691		7.4884	0.00340363		1131.89	0.00368445		1680.21	0.00456462			12	12		12	12
																									6.68276	0.00519541		3.23408	0.00393795		4.47323	0.00194223		7.12856	0.00328084		1081.02	0.00374148		1561.15	0.00454722			12	12		12	12
																									6.20117	0.00522165		3.38142	0.00398542		4.56976	0.00188621		5.76015	0.00324307		940.579	0.00376486		1638.56	0.00444833			12	12		12	12
																									5.80493	0.00522401		3.71705	0.00406123		4.63145	0.00184521		4.89708	0.00317554		869.197	0.00378064		1746.9	0.00442018			12	12		12	12
																									6.16997	0.00506506		3.66567	0.00404835		4.52552	0.00177443		4.63329	0.00318791		781.357	0.00379986		2458.62	0.00424764			12	12		12	12
																									6.25886	0.00491988		3.80577	0.00409152		4.13166	0.00166525		4.95188	0.00317886		803.08	0.00384748		2781.47	0.00407399			12	12		12	12
																									6.18817	0.00479115		3.58736	0.00415408		3.52711	0.00154543		4.8472	0.00321956		813.015	0.00386365		2868.94	0.00405435			12	12		12	12
																									5.98199	0.00469029		3.90893	0.00418881		3.22907	0.00150298		5.3207	0.00320445		791.059	0.00393232		2802.9	0.0040575			12	12		12	12
																									5.92506	0.00469507		3.92819	0.00415507		3.12632	0.00147814		5.89135	0.00318595		930.597	0.00400425		2776.6	0.00408032			12	12		12	12
																									5.64619	0.00480788		3.65974	0.0042287		3.20601	0.00147272		6.00927	0.00323006		1229.86	0.00398539		3379.56	0.00400795			12	12		12	12
																									5.39538	0.00482164		3.71739	0.00435522		3.21702	0.00151433		6.62985	0.00323989		1408.25	0.0039548		4040.93	0.00389271			12	12		12	12
																									5.90855	0.00484331		3.58189	0.0042557		3.21682	0.00152881		6.57745	0.00325919		1684.77	0.00403525		4581.71	0.00387138			12	12		12	12
																									6.10856	0.0047321		3.66221	0.00429578		3.04511	0.00146577		6.5551	0.003199		1697.57	0.00417258		5220.75	0.00386482			12	12		12	12
																									4.80949	0.0126968		3.53995	0.0107881		6.32907	0.0053274		6.02234	0.0135911		4371.68	0.0115828		36891.5	0.0111958			16	16		16	16
																									4.72715	0.0122879		3.72525	0.0106019		7.28115	0.0052163		6.06883	0.0135129		4417.04	0.0115776		38930.8	0.0112124			16	16		16	16
																									4.4256	0.0118335		3.70128	0.0103706		7.41192	0.00523738		5.82841	0.0134211		4661.98	0.0114744		39525.6	0.011318			16	16		16	16
																									3.55006	0.0114492		3.68726	0.0101659		7.28889	0.00527568		5.69809	0.0135712		4848.93	0.0112034		39191.5	0.0112481			16	16		16	16
																									3.3103	0.0112103		3.85321	0.0101418		7.36195	0.00532324		5.56322	0.0138544		4868.84	0.0110355		38182.8	0.0116279			16	16		16	16
																									2.97917	0.0111166		3.98719	0.0102823		7.62095	0.00529334		5.13755	0.0137887		4833.11	0.010657		38638.8	0.0117632			16	16		16	16
																									2.93908	0.0109285		4.18353	0.0104551		8.1211	0.00534701		4.86236	0.0136565		4926.52	0.0102322		38797.9	0.0117419			16	16		16	16
																									3.235	0.010805		4.01081	0.0103206		8.37705	0.00538747		5.89353	0.0138972		4836.47	0.0096703		37013.5	0.0116505			16	16		16	16
																									3.27211	0.0110299		3.97428	0.0102219		8.31057	0.00556025		5.71804	0.0138867		4409.33	0.00929903		35560.4	0.0116845			16	16		16	16
																									3.51845	0.0112899		3.667	0.0102395		7.96847	0.00582239		5.74716	0.0137435		3941.74	0.00902506		34462.8	0.0115395			16	16		16	16
																									3.54416	0.0113776		3.57474	0.0104693		7.94614	0.00605472		5.29658	0.0136291		3474.73	0.00885569		34460	0.0114398			16	16		16	16
																									3.7283	0.0113936		3.39152	0.0110128		7.79931	0.00605395		4.82126	0.0135215		3188.13	0.00858514		33912	0.0113448			16	16		16	16
																									3.77878	0.0113613		3.32217	0.0111393		7.86225	0.00599364		4.89828	0.0131698		2682.13	0.00824985		32264.2	0.0114165			16	16		16	16
																									3.3199	0.011574		3.34075	0.0111413		8.09534	0.00596377		4.81316	0.0128595		2497.64	0.00820677		30236.5	0.0114661			16	16		16	16
																									3.18194	0.0116073		3.37012	0.0111375		8.88118	0.00604794		4.3457	0.0125718		2355.27	0.00814205		27669.7	0.0115319			16	16		16	16
																									3.18225	0.0115772		3.36223	0.0111134		8.82357	0.00609784		4.25564	0.0124393		2289.61	0.00808376		24919.6	0.0115838			16	16		16	16
																									3.14858	0.0115143		3.20872	0.0110755		8.51399	0.00608904		4.35558	0.0121783		2153.74	0.00805176		22446.4	0.0113782			16	16		16	16
																									2.93441	0.0113935		3.31595	0.0109478		8.23196	0.0060531		4.15437	0.0121869		2069.28	0.00798833		20208.3	0.0111565			16	16		16	16
																									3.07119	0.0111193		3.06668	0.0111061		7.74023	0.00591918		4.47146	0.0121251		2108.25	0.00796243		17896	0.0109108			16	16		16	16
																									3.3665	0.0111305		3.46658	0.0110056		7.27727	0.00590955		4.77549	0.0120312		2181.37	0.0080282		16215.3	0.0108665			16	16		16	16
																									3.45629	0.0114512		3.51745	0.0109898		6.90774	0.00604212		4.89491	0.0118994		2358.42	0.00813083		13813.2	0.0109593			16	16		16	16
																									3.56014	0.0116783		3.2489	0.0110311		6.30883	0.00613778		4.80764	0.0117931		2074.13	0.00819252		11709.3	0.011011			16	16		16	16
																									3.90261	0.0117623		3.27075	0.0110506		6.49766	0.00613762		4.69959	0.0115821		1615.18	0.00847686		9760.33	0.0108964			16	16		16	16
																									4.42385	0.0119059		3.23844	0.010972		6.40199	0.00611464		5.09293	0.0112593		1476.21	0.00889895		8117.48	0.0107088			16	16		16	16
																									4.57323	0.0119916		3.34388	0.0109367		6.43672	0.00608539		5.61762	0.0109425		1400.7	0.00914969		6952.97	0.0105975			16	16		16	16
																									4.63452	0.0121731		3.14171	0.010852		5.73242	0.00612201		7.48324	0.0109861		1348.58	0.0093995		6405.88	0.0105377			16	16		16	16
																									4.80219	0.0123316		3.23821	0.0108977		5.46589	0.00608896		6.48127	0.0109371		1433.17	0.00976243		6409.71	0.0105521			16	16		16	16
																									4.63885	0.0124221		3.3551	0.0109733		5.38999	0.00607687		6.44674	0.0109658		1573.2	0.0101203		5848.89	0.0104526			16	16		16	16
																									4.69343	0.0124286		3.50958	0.010641		5.25932	0.00600057		6.83524	0.0109907		1608.57	0.0104715		5139.69	0.0103982			16	16		16	16
																									4.63591	0.0124402		3.7256	0.0104633		5.14831	0.00596008		6.89439	0.0111004		1591.65	0.0107154		4026.96	0.010357			16	16		16	16
																									4.52178	0.0124839		4.00169	0.0100668		5.20756	0.00591401		7.01302	0.0112094		1637.68	0.0109807		3288.71	0.0104931			16	16		16	16
																									4.36902	0.0123956		4.2875	0.0100144		4.92278	0.00604182		7.14007	0.0112335		1593.78	0.0111727		2736.91	0.0106439			16	16		16	16
																									4.30294	0.0124726		4.23904	0.0100417		4.56433	0.00610473		7.04548	0.0112003		1691.66	0.0114218		2474.47	0.0108003			16	16		16	16
																									4.38224	0.0124789		4.29669	0.0102628		3.3133	0.00612296		7.01378	0.0112437		1912.38	0.0116513		2192.67	0.0111051			16	16		16	16
																									4.3071	0.0127089		4.07915	0.0102621		2.98933	0.00602787		7.04184	0.0112591		2103.03	0.0119649		1943.39	0.0113339			16	16		16	16
																									4.13873	0.0130076		4.34659	0.010268		2.87485	0.00600434		7.01565	0.0114581		2390.04	0.0121025		1890.87	0.0117107			16	16		16	16
																									4.25198	0.0133094		4.2938	0.0103327		2.78469	0.00600505		6.92935	0.0114122		3604.74	0.012479		1767.75	0.0118863			16	16		16	16
																									4.02193	0.0135493		4.49543	0.0103351		2.89846	0.00613513		7.01763	0.0114477		4553.2	0.0126299		1667.96	0.0121171			16	16		16	16
																									3.74091	0.0138045		4.28585	0.0103914		2.61246	0.00613695		6.66557	0.0118016		6157.85	0.012654		1689.88	0.0123876			16	16		16	16
																									3.71319	0.0136063		5.10916	0.0108908		2.38951	0.00607877		6.41645	0.0120018		6373.9	0.0128275		1673.44	0.0124381			16	16		16	16
																									3.5143	0.0133849		5.82828	0.0111351		2.40403	0.0059877		6.39302	0.0120541		6758.96	0.0129764		1638.52	0.0126313			16	16		16	16
																									3.37993	0.0131977		6.30084	0.0112685		2.32686	0.0058793		6.70937	0.0121875		7575.46	0.0129114		1763.33	0.012912			16	16		16	16
																									3.22872	0.0128589		6.74841	0.0115823		2.27892	0.00583323		6.51955	0.0122204		8109.86	0.0129519		1959.81	0.0134866			16	16		16	16
																									2.87314	0.012553		6.74252	0.0119667		2.40844	0.00590283		6.37996	0.0124313		8378.76	0.012974		1970.96	0.0139235			16	16		16	16
																									3.04053	0.0123032		6.76271	0.012109		2.86241	0.00590751		5.34391	0.0124186		8619.25	0.0130541		1990.46	0.0138717			16	16		16	16
																									2.85101	0.0121179		6.73834	0.0120017		2.75854	0.00587514		5.23009	0.0120918		8782.35	0.0131422		2215.17	0.0138185			16	16		16	16
																									2.86541	0.0120514		6.70083	0.0118603		2.86891	0.00583944		5.09573	0.0115237		9051.17	0.0132534		2065.7	0.0136796			16	16		16	16
																									2.88227	0.0119768		6.78573	0.0120151		3.09111	0.00580609		5.11699	0.0114735		9125.23	0.013435		1978.29	0.0136121			16	16		16	16
																									2.81691	0.0118314		6.76057	0.0121134		4.17616	0.00569033		4.83509	0.0113997		9336.81	0.0134533		2125.68	0.0134933			16	16		16	16
																									2.98891	0.011759		6.94866	0.012083		4.2192	0.00562379		5.11305	0.0113083		9635.67	0.0134647		1905.83	0.0135279			16	16		16	16
																									3.2534	0.011708		6.83373	0.0119009		4.18259	0.00557494		5.09929	0.0110886		9753.38	0.0134982		2080.74	0.0132743			16	16		16	16
																									3.18924	0.011752		6.8204	0.0117761		4.2266	0.00563232		5.11694	0.0111347		9975.14	0.013609		2413.53	0.0130589			16	16		16	16
																									3.19592	0.0116504		6.83624	0.0119413		4.3771	0.00570885		5.38946	0.0111831		10227.9	0.0136466		3109.14	0.0127364			16	16		16	16
																									3.2564	0.011599		6.78344	0.0119516		4.33492	0.00563474		5.42648	0.0112307		10464.2	0.013788		3331.38	0.0123978			16	16		16	16
																									3.71523	0.0114386		6.70259	0.01226		4.25176	0.00567272		5.4723	0.0112499		10617.8	0.0139291		3370.01	0.0120242			16	16		16	16
																									3.81059	0.0113684		6.96254	0.012458		4.33116	0.00570246		5.82496	0.0115024		10691.6	0.0137947		3282.93	0.0119143			16	16		16	16
																									3.82637	0.0112782		6.45975	0.012565		5.21417	0.00556223		5.66273	0.0120102		10458.6	0.0135766		3250.05	0.0119216			16	16		16	16
																									3.93586	0.0111021		6.46642	0.0125746		5.11758	0.00551321		7.21277	0.0121398		10228.5	0.0135937		3337.08	0.0118466			16	16		16	16
																									3.96937	0.0110906		5.95735	0.0124384		5.06745	0.00556424		7.33193	0.0119578		10195.6	0.0135758		5046.45	0.011767			16	16		16	16
																									3.84149	0.0110416		4.97755	0.0122913		4.81182	0.00568627		7.67448	0.0119851		9859.62	0.0134493		6874.29	0.0117183			16	16		16	16
																									2.3592	0.0269569		2.92081	0.0301672		4.89387	0.0154911		4.84104	0.0265007		2811.48	0.0265031		3875.07	0.0287487			19	20		20	20
																									2.29676	0.0269909		3.44759	0.0296357		4.90983	0.0154509		4.89082	0.0270007		3004.02	0.0262684		3729.47	0.0286787			19	20		20	20
																									2.44183	0.0270781		4.32095	0.0296711		4.99508	0.0154232		4.81804	0.0275132		3147.74	0.0264069		4019.49	0.0286539			19	20		20	20
																									2.32848	0.0272741		4.4587	0.029281		4.93812	0.0153589		5.13381	0.0284618		3231.89	0.0266096		3653.71	0.0283162			19	20		20	20
																									2.17403	0.0274255		4.35848	0.029399		4.76788	0.0156076		5.50919	0.0293721		3274.24	0.0271159		3873.33	0.0281365			19	20		20	20
																									2.1287	0.027538		4.66345	0.0292443		4.33395	0.0158562		5.36128	0.030056		4067.02	0.0271934		3815.85	0.0274206			19	20		20	20
																									1.89792	0.0275243		5.10876	0.0295902		4.23706	0.0161417		5.02799	0.0310083		4192.65	0.0274172		4037.01	0.0270503			20	20		20	20
																									1.85806	0.0273478		4.95295	0.0296966		4.16143	0.0164469		4.81051	0.031599		4258.37	0.027325		4625.84	0.0264988			20	20		20	20
																									1.83238	0.0269437		4.65497	0.0295642		4.14716	0.0167125		5.6164	0.031641		4290.75	0.027556		4982.47	0.0261521			20	20		20	20
																									1.85705	0.0267957		4.55442	0.0290939		4.17677	0.0169772		6.05641	0.0319042		4165.14	0.0275815		4850.03	0.0257909			20	20		20	20
																									1.84502	0.0267552		5.35165	0.0285817		3.83752	0.0172417		6.72082	0.0318088		4077.49	0.0276938		4841.71	0.0254877			20	20		20	20
																									1.73688	0.0268431		5.34054	0.028221		3.49537	0.0176837		6.98798	0.0317742		4084.29	0.027787		5632.47	0.0256243			20	20		20	20
																									1.72912	0.0269242		5.37202	0.0281051		3.09086	0.0180782		6.99915	0.0322209		4231.29	0.0275925		6124.87	0.0259505			20	20		20	20
																									1.67096	0.0268739		5.15743	0.0275859		4.13701	0.0182699		6.86046	0.0327357		4118.31	0.0274347		6939.38	0.0256711			20	20		20	20
																									1.53772	0.0269749		5.14586	0.0271554		4.59179	0.018612		6.92662	0.0334104		4187.22	0.0272808		7438.62	0.0254586			20	20		20	20
																									1.66729	0.0269812		5.1694	0.0265939		4.01938	0.0189404		6.68644	0.0338355		4277.56	0.0271768		7737.72	0.0257508			20	20		20	20
																									1.98373	0.0271982		5.21057	0.0263097		3.90656	0.0193549		6.42351	0.0338577		4301.69	0.0274049		8040.17	0.0259081			20	20		20	20
																									1.91465	0.0272928		5.24938	0.0256688		3.78697	0.0196662		6.63518	0.0337433		4262.04	0.0274481		8057.27	0.0259145			20	20		20	20
																									2.1024	0.0274674		5.30547	0.0253193		4.06554	0.0199654		7.05585	0.0341043		4114.72	0.0274076		7986.73	0.0257022			20	20		20	20
																									2.40213	0.0275899		5.31689	0.0250171		4.1606	0.0202323		7.84741	0.0341724		4008.17	0.0273854		7942.22	0.025815			20	20		20	20
																									2.31988	0.0277533		5.35106	0.0250924		4.26509	0.0205736		8.2917	0.0343506		3830.23	0.0270718		7957.68	0.0256034			20	20		20	20
																									2.36439	0.0277872		5.02448	0.0254143		4.35048	0.0207576		8.33417	0.0342104		3695.86	0.0269807		7732.46	0.0252047			20	20		20	20
																									2.30228	0.0277635		4.92474	0.0246946		4.40894	0.0209361		7.79916	0.0337734		3592.73	0.0265821		7730.77	0.0248519			20	20		20	20
																									2.3063	0.0277104		5.34911	0.0250946		4.25865	0.0212217		7.69434	0.0331722		3509.01	0.0261146		7770.3	0.0244142			20	20		20	20
																									2.41899	0.0275484		5.35672	0.025904		4.33951	0.0210033		7.56938	0.0333144		3552.52	0.0257423		7636.89	0.0243895			20	20		20	20
																									2.38306	0.0276241		4.93039	0.026415		4.68052	0.0210149		7.43287	0.0327588		2715.37	0.025701		7473.11	0.0245243			20	20		20	20
																									2.34528	0.0276244		4.75566	0.0267285		4.49393	0.0211227		7.75616	0.0316144		2594.98	0.0261941		7106.9	0.0244683			20	20		20	20
																									2.47834	0.0276068		4.98184	0.026705		4.63404	0.0215824		7.87941	0.0311202		2504.33	0.0265386		6582.09	0.0244359			20	20		20	20
																									2.66406	0.0277313		5.04783	0.0265586		4.71576	0.0215962		7.85697	0.0311301		2453.83	0.0264602		6594.53	0.0244133			20	20		20	20
																									2.69207	0.0274983		4.8605	0.026725		5.08529	0.0215606		7.94267	0.0310818		2492.63	0.0263454		6699.16	0.0245979			20	20		20	20
																									2.75527	0.0272471		4.0108	0.0267033		4.91796	0.0215012		8.39137	0.0317398		2528.29	0.0264177		6851.47	0.0242712			20	20		20	20
																									3.1635	0.0272508		3.96093	0.026764		4.93591	0.0213776		9.6206	0.0320474		2249.33	0.0267812		6371.94	0.0237436			20	20		20	20
																									3.23946	0.027044		4.87076	0.0271077		4.68316	0.0215261		9.90475	0.0318755		2205.2	0.0273965		5739.54	0.023737			20	20		20	20
																									3.53905	0.0267665		5.41308	0.0273622		3.57449	0.021611		10.0256	0.0319751		2102.9	0.0278769		4981.7	0.0242982			20	20		20	20
																									3.88212	0.0265316		7.00992	0.0271884		3.67231	0.0216313		9.81207	0.0317326		1900.39	0.028229		4444.2	0.0243434			20	20		20	20
																									3.95933	0.0263596		7.2951	0.0276701		4.14941	0.021411		13.0247	0.0310233		1763.34	0.0281337		4140.29	0.0245515			20	20		20	20
																									4.15743	0.0260216		7.63289	0.0281912		4.3788	0.021141		13.2991	0.0305243		1465.38	0.0283619		3802.18	0.0247353			20	20		20	20
																									4.29338	0.0258528		7.73155	0.0286347		4.31783	0.0212564		13.0329	0.0300356		1407.2	0.0286133		3674.47	0.0252686			20	20		20	20
																									3.90719	0.0257028		7.8358	0.0290978		4.1481	0.0213391		12.2983	0.0294912		1364.51	0.0289305		3550.74	0.0252846			20	20		20	20
																									4.00414	0.0255588		7.92704	0.0292833		4.39279	0.0211702		12.2619	0.0284232		1395.66	0.0293681		3550.01	0.0251054			20	20		20	20
																									4.03022	0.0255024		7.76279	0.0294608		4.69447	0.0211732		12.037	0.0284144		1401.1	0.0296569		3345.42	0.0257679			20	20		20	20
																									4.02151	0.0256542		7.59071	0.0295824		5.03698	0.0214964		12.1085	0.0288478		1382.31	0.0297726		3057.09	0.0264484			20	20		20	20
																									4.11415	0.0257295		6.85972	0.0303135		5.28473	0.0216197		12.2027	0.0295362		1316.88	0.0298016		2887.74	0.0269246			20	20		20	20
																									3.93273	0.0258377		6.90231	0.029994		5.30961	0.0214267		12.0359	0.0292095		1266.8	0.0299855		2870.32	0.0269671			20	20		20	20
																									4.20309	0.0260927		6.94488	0.0293246		5.0994	0.0212413		12.0157	0.0288656		1340.49	0.0299415		3138.82	0.0271865			20	20		20	20
																									4.46313	0.0259993		6.8865	0.0288668		5.75448	0.0210455		12.1163	0.0289377		1460.34	0.0297473		3256.1	0.0272003			20	20		20	20
																									4.70426	0.0258558		7.10018	0.0287925		7.09037	0.021115		12.6883	0.0291324		1582.89	0.0291652		3257.75	0.0271483			20	20		20	20
																									4.68125	0.0258681		7.27638	0.0292669		7.6114	0.0209298		12.7246	0.0292205		1668.71	0.0288646		3153.12	0.0270952			20	20		20	20
																									4.56293	0.0259543		7.28684	0.0291576		7.04576	0.0209628		11.5529	0.0297106		1723.11	0.0286655		2918.86	0.0270286			20	20		20	20
																									4.75289	0.0262891		7.24574	0.0296668		6.8222	0.02094		11.7179	0.0305927		1645.97	0.0283799		2668.09	0.0269857			20	20		20	20
																									4.81668	0.0260178		7.24927	0.0297861		7.33003	0.0208743		10.5581	0.0309814		1640.31	0.0281728		2412.54	0.0271825			20	20		20	20
																									4.52307	0.0259602		7.10047	0.02956		7.92175	0.0208226		9.52763	0.0311188		1721.86	0.0273821		2742.02	0.0273967			20	20		20	20
																									4.5077	0.0262717		5.86879	0.0289662		7.95455	0.0205151		9.73724	0.0313968		1878.3	0.0270725		2857.97	0.0269835			20	20		20	20
																									4.19535	0.0265578		5.44721	0.0289611		8.07092	0.0203459		10.0777	0.0315085		1924.63	0.0264994		2976.14	0.0270695			20	20		20	20
																									3.83469	0.0267067		4.09637	0.0290951		7.87236	0.0199614		9.71352	0.0316812		1987.01	0.0263287		3086.42	0.026926			20	20		20	20
																									3.64102	0.026915		7.89915	0.0287249		7.7498	0.0198352		6.48937	0.0320504		2646.67	0.0261095		3230	0.0268911			20	20		20	20
																									3.46351	0.0269891		7.96385	0.0285215		7.83367	0.0196984		6.38997	0.0324929		2905.71	0.0257835		3348.08	0.0265566			20	20		20	20
																									3.617	0.0269168		7.9001	0.028717		8.03437	0.0196193		6.31001	0.0333089		2979.85	0.0260159		3661.63	0.0264869			20	20		20	20
																									3.60865	0.0268854		7.79035	0.028665		8.04973	0.0195413		6.28855	0.0346459		2984.55	0.0259417		3731.79	0.0262498			20	20		20	20
																									3.45446	0.0269348		7.75588	0.0284858		8.73277	0.0198095		5.85326	0.0351842		3237.96	0.0257631		4511.6	0.025974			20	20		20	20
																									3.88472	0.00811529		3.56476	0.0100464		3.08413	0.00375328		15.1507	0.00764213		1901.9	0.00808567		4615.71	0.00700636			15	15		15	15
																									3.4619	0.00802069		3.28489	0.00989291		3.08237	0.00375178		15.6338	0.00754865		1826.83	0.00803641		3206.48	0.00700949			15	15		15	15
																									3.56923	0.00796442		3.13758	0.00944398		3.10008	0.00371296		15.1083	0.00738261		1804.11	0.00779721		2855.94	0.00702818			15	15		15	15
																									3.67186	0.00779773		2.84616	0.00914871		3.04938	0.00362869		16.0602	0.00727426		1762.79	0.00764311		2786.41	0.00715361			15	15		15	15
																									3.67506	0.00760307		2.79465	0.00888842		2.92738	0.00362045		15.633	0.00720778		1719.93	0.00743144		2640.49	0.00727662			15	15		15	15
																									3.57865	0.00755625		2.88178	0.00864538		2.86521	0.00364191		15.8789	0.00719421		1626.86	0.0072371		2776.9	0.00738192			15	15		15	15
																									3.16912	0.00746227		3.079	0.00837157		2.84301	0.00362947		15.3449	0.00719718		1560.79	0.00717349		2677.28	0.00760648			15	15		15	15
																									3.40937	0.00750713		3.5172	0.00830235		2.85018	0.00361874		14.9157	0.00713273		1482.52	0.00704503		2732.71	0.00776273			15	15		15	15
																									3.6689	0.00757367		3.59388	0.00824801		2.89277	0.00361699		14.155	0.00708749		1143.83	0.00705844		2828.62	0.00787646			15	15		15	15
																									4.19716	0.00777586		3.40716	0.00809586		2.79776	0.00357573		14.0065	0.00714699		1106.33	0.00725686		3212.91	0.00793518			15	15		15	15
																									4.13482	0.00801215		2.94876	0.0077279		2.68764	0.00355134		13.4427	0.00714389		1005.72	0.0072452		3643.14	0.00791977			15	15		15	15
																									4.30771	0.00835299		3.00591	0.00744905		2.51678	0.00354791		12.8956	0.00712026		930.991	0.00741174		3818.66	0.00787062			15	15		15	15
																									4.48625	0.00854453		2.99155	0.00726855		2.41153	0.0035816		13.3226	0.00717496		860.041	0.00767029		3767.41	0.00774686			15	15		15	15
																									4.51262	0.00860834		3.12964	0.00728841		2.10632	0.00357994		13.4891	0.00759856		821.417	0.00765461		3825.9	0.00770632			15	15		15	15
																									4.68107	0.00866712		3.09923	0.00716115		2.2202	0.00357832		13.0642	0.00768594		783.363	0.00773637		3890.21	0.00780085			15	15		15	15
																									5.22121	0.00894056		2.98973	0.00711377		2.21413	0.00363997		12.7824	0.00761001		676.148	0.00789271		4179.81	0.00788719			15	15		15	15
																									5.74601	0.00909124		3.00574	0.00731582		2.20772	0.00362698		12.1718	0.00757129		673.806	0.00821467		4288.24	0.00796301			15	15		15	15
																									5.61385	0.00904764		3.19624	0.00764679		2.14509	0.00366482		12.3435	0.00771123		786.287	0.00856778		4015.03	0.00806265			15	15		15	15
																									5.49618	0.00903922		3.13188	0.00793257		2.12343	0.00377517		11.9754	0.00783906		843.655	0.00898833		4319.83	0.00806446			15	15		15	15
																									5.55938	0.0092041		3.06927	0.00805703		2.05566	0.00378489		11.9326	0.00790371		867.736	0.00923213		3980.36	0.00803046			15	15		15	15
																									5.34568	0.00922437		3.1015	0.00796071		2.19741	0.0038406		12.5104	0.00796652		1056.13	0.00945628		3969.81	0.0079475			15	15		15	15
																									5.35922	0.00930313		3.35184	0.00796567		2.21911	0.00392758		11.2904	0.00812843		1356.36	0.00978002		4026.34	0.00804699			15	15		15	15
																									5.16011	0.00967688		3.56168	0.00793638		2.27492	0.00405818		10.5244	0.0081594		1462.46	0.0100956		4033.42	0.00808737			15	15		15	15
																									5.22977	0.00999739		3.71224	0.00771915		2.43362	0.00409649		9.9171	0.00830082		1691.51	0.0104771		4096.1	0.00806596			15	15		15	15
																									5.42448	0.00992193		3.46484	0.00772231		2.49499	0.0041247		9.16109	0.00826234		1832	0.0105138		4278.09	0.00800751			15	15		15	15
																									5.51281	0.00976821		3.48278	0.00770967		2.51112	0.00415013		10.1084	0.00834572		1914.54	0.0103815		4292.13	0.00789005			15	15		15	15
																									5.60722	0.00969062		3.02502	0.00777865		2.28392	0.00413958		9.44885	0.0085587		1933.65	0.0103106		4343.59	0.00788904			15	15		15	15
																									5.33636	0.00965643		2.94912	0.00775472		2.11351	0.00411658		9.12505	0.00868462		2040.67	0.0102296		4302.55	0.00795447			15	15		15	15
																									4.91018	0.0094344		2.8712	0.00778253		2.14758	0.00412148		9.22891	0.0087635		2080.03	0.0100853		4142.59	0.00810064			15	15		15	15
																									5.27774	0.0092928		3.15028	0.00786263		2.134	0.00416708		9.44496	0.00880903		2078.09	0.00984853		4054.03	0.0082394			15	15		15	15
																									5.38617	0.00902903		3.24594	0.00806046		2.14419	0.00426394		9.24407	0.00919883		2098.96	0.00974589		3551.19	0.00846492			15	15		15	15
																									5.42291	0.00881316		3.31945	0.0080229		2.11231	0.0042652		8.7152	0.00952627		2088.01	0.00951629		3454.78	0.00863223			15	15		15	15
																									5.26368	0.00884263		3.32849	0.0079769		2.1236	0.00427387		8.10636	0.00951467		2101.12	0.00947901		3484.64	0.00877851			15	15		15	15
																									5.05335	0.0089167		3.32176	0.00761812		2.06624	0.0043116		7.85411	0.00917385		2105.65	0.0093539		3945.06	0.0090233			15	15		15	15
																									4.87685	0.00905069		3.34389	0.00750488		2.0271	0.00429415		7.59115	0.00936642		2119.92	0.00910679		4432.58	0.00947442			15	15		15	15
																									4.6653	0.00874352		3.44449	0.00739071		2.16586	0.00430582		7.53895	0.00953551		2142.85	0.00886609		4600.19	0.00996515			15	15		15	15
																									4.52752	0.00877256		3.53068	0.00718999		2.63677	0.00434249		6.77322	0.0095847		2131.23	0.00856066		6354.24	0.0103727			15	15		15	15
																									4.55918	0.0088238		3.56536	0.00722528		2.38764	0.00424843		6.49952	0.00948274		1966.98	0.00827907		9898.15	0.0105996			15	15		15	15
																									4.79639	0.00889949		3.51309	0.00716683		2.45021	0.00419468		6.73251	0.00951875		1976.79	0.00815739		12317.5	0.0106785			15	15		15	15
																									4.77767	0.00905011		3.72351	0.00720256		2.27963	0.00418597		6.49561	0.00955691		2000.74	0.00813704		12998.5	0.0107693			15	15		15	15
																									4.97494	0.00919168		3.70943	0.0074183		2.29165	0.00418704		6.41251	0.00956461		1708.68	0.00807675		13552.9	0.0108244			15	15		15	15
																									4.88025	0.00902343		3.60289	0.00755048		2.34599	0.00411177		6.11323	0.00948477		1593.05	0.00783658		13991.1	0.0106908			15	15		15	15
																									4.98797	0.00888712		3.45739	0.00782799		2.41288	0.00412328		5.85544	0.00945527		1460.31	0.00754636		15616.7	0.0106108			15	15		15	15
																									4.76102	0.00890168		3.56225	0.00795784		2.27484	0.00413282		5.8883	0.00933675		1357.97	0.00751979		15820.5	0.0106315			15	15		15	15
																									4.89595	0.00893918		3.46559	0.00791864		2.44429	0.00418169		4.77178	0.00930851		1505.09	0.00779868		15996.5	0.0106351			15	15		15	15
																									4.7742	0.0089919		3.55334	0.00790349		2.478	0.00422397		4.66168	0.00903991		1691.19	0.00791239		16283.9	0.0106899			15	15		15	15
																									4.6776	0.00903075		3.50103	0.00795196		2.68594	0.0043136		4.36193	0.0089122		1603.1	0.00782866		16532.7	0.0106947			15	15		15	15
																									4.74219	0.0091343		3.49424	0.00802845		2.57569	0.00440284		4.34142	0.00888285		1652.1	0.00765948		16507.6	0.0107404			15	15		15	15
																									4.12805	0.00934919		3.57957	0.00810046		2.68103	0.00444933		4.32857	0.00885067		1630.29	0.00772593		16371.8	0.0107225			15	15		15	15
																									4.15152	0.00933153		3.6494	0.00808586		2.79865	0.00445626		4.18131	0.0087504		1637.35	0.00788152		16486.6	0.010536			15	15		15	15
																									3.94677	0.00944634		3.46359	0.00810478		2.85835	0.00447705		4.52009	0.0082926		1655.66	0.00779438		16568.5	0.0104344			15	15		15	15
																									3.87166	0.0094382		3.61947	0.00805913		2.89967	0.00452533		4.67192	0.00809042		1728.78	0.00779765		17052.1	0.0103185			15	15		15	15
																									3.77872	0.00942926		4.16573	0.00814857		2.97999	0.00452534		4.514	0.00798297		1761.94	0.00799255		16915.2	0.0103674			15	15		15	15
																									3.69129	0.00941085		3.81736	0.00818796		3.2448	0.00453462		4.40488	0.00805315		1762.92	0.00834867		15966	0.0101395			15	15		15	15
																									4.41403	0.00952112		3.73729	0.00816361		3.12564	0.00447168		4.45914	0.00796426		1719.49	0.00869579		15687.8	0.00960272			15	15		15	15
																									4.32292	0.0093823		3.80841	0.00811896		2.98253	0.00444876		4.44934	0.00785254		1690.44	0.0091173		15204.5	0.00921831			15	15		15	15
																									4.25255	0.00931461		3.6689	0.00800803		2.67075	0.00447286		4.60247	0.00771908		1649.74	0.0091856		10877.2	0.00891928			15	15		15	15
																									4.31676	0.0093463		3.65891	0.00777891		2.80657	0.00449329		4.86854	0.007701		1644.74	0.00940674		9425.76	0.00870009			15	15		15	15
																									4.34557	0.00933987		3.50074	0.00765048		2.69584	0.00455167		5.29702	0.00772564		1529.65	0.00950441		6744.53	0.00864329			15	15		15	15
																									4.39159	0.00927506		3.22925	0.00777126		2.81315	0.00452523		6.54964	0.00772805		1489.04	0.00953243		5957.65	0.00876309			15	15		15	15
																									3.79369	0.00241916		2.75984	0.00239092		3.13698	0.000482782		6.76798	0.00425937		727.824	0.00214248		11129.6	0.00192441			10	10		10	10
																									4.08066	0.00239678		2.62088	0.00239324		3.11264	0.000481046		6.47708	0.00455788		747.893	0.00216979		11702.7	0.00193096			10	10		10	10
																									4.2502	0.00241549		2.68778	0.00236058		2.99421	0.000493826		5.92092	0.00479667		716.598	0.00210578		12710.5	0.00189749			10	10		10	10
																									4.19799	0.00242415		2.88537	0.00218385		2.87588	0.000480145		5.75279	0.00492377		721.678	0.00203933		13030.2	0.00184402			10	10		10	10
																									4.37865	0.00243829		2.92314	0.00220179		2.90309	0.000469707		5.54082	0.00506058		735.352	0.00196007		13286.5	0.00183443			10	10		10	10
																									4.46701	0.00236324		2.88602	0.00218824		2.63138	0.000466647		5.61474	0.00507274		756.821	0.00190791		12004	0.00193117			10	10		10	10
																									4.73414	0.00233717		2.62008	0.00219034		2.79056	0.000414683		5.79584	0.00505042		797.568	0.00188728		10987.2	0.00193078			10	10		10	10
																									4.75051	0.00229559		2.65735	0.00222367		2.81968	0.000378182		5.78794	0.00517354		831.177	0.00186241		10943.2	0.00189438			10	10		10	10
																									4.47161	0.00227596		2.7328	0.00220326		2.85153	0.000341371		5.77839	0.00518319		809.657	0.00181647		10818.8	0.00184501			10	10		10	10
																									4.59075	0.00220142		2.75049	0.00215076		2.81621	0.000353143		6.33777	0.00530707		927.272	0.00187506		10213.5	0.001833			10	10		10	10
																									4.69165	0.00212638		2.78635	0.00213746		2.86002	0.000370124		6.76084	0.00543772		1115.21	0.00185327		9119.57	0.00193944			10	10		10	10
																									4.64815	0.00211393		3.11692	0.00216961		2.66523	0.000401732		6.44831	0.00548092		1200.74	0.00177597		8086.51	0.00197057			10	10		10	10
																									5.04546	0.00210918		3.31673	0.00223305		2.66327	0.000426893		6.44841	0.00540156		1258.88	0.00174305		8000.55	0.00199062			10	10		10	10
																									4.85282	0.00211932		3.43179	0.00229076		2.65862	0.000451828		6.66992	0.00525514		1284	0.00163982		8012.6	0.00200862			10	10		10	10
																									5.2356	0.00216307		3.61174	0.00229086		3.25704	0.000474117		6.63417	0.00507674		1375.37	0.00162475		7986.52	0.00202611			10	10		10	10
																									4.96464	0.0022011		3.67075	0.00233428		3.63268	0.000493974		6.78372	0.00500995		1405.28	0.00161088		7616.17	0.00208295			10	10		10	10
																									4.88024	0.00220381		3.8819	0.00234165		3.62442	0.000543481		6.58778	0.00477073		1483.83	0.0015411		6988.87	0.00211726			10	10		10	10
																									4.70039	0.00212005		4.03202	0.00233		3.84826	0.000611865		6.45549	0.00450636		1465.85	0.00151188		7076.03	0.00214465			10	10		10	10
																									4.76471	0.0021132		4.00229	0.00233058		3.81943	0.00069362		6.5806	0.00417739		1501.97	0.00150279		7338.39	0.0020812			10	10		10	10
																									4.66675	0.00207024		3.95328	0.00233681		4.19893	0.000786473		6.54467	0.00389681		1437.23	0.00146282		7338.91	0.0020602			9	10		10	10
																									4.78686	0.00211253		4.13342	0.00232995		4.02275	0.000862131		6.47732	0.00352482		1480.77	0.00145396		7033.21	0.00210144			9	10		10	10
																									4.54149	0.00217277		4.09249	0.00232048		4.4172	0.000920519		6.36321	0.00318254		1662.27	0.00144212		6545.41	0.00213314			9	10		10	10
																									4.76859	0.00216658		4.11751	0.00231231		4.54966	0.000962285		6.47024	0.00306254		1710.11	0.00143325		5645.98	0.00213914			9	10		10	10
																									4.89298	0.00214179		4.37356	0.00222761		4.61997	0.00101712		6.47586	0.00279		1719.36	0.00143721		5138.54	0.00217812			9	10		10	10
																									4.58551	0.00218285		4.31586	0.00220277		4.71452	0.00106899		6.65018	0.00255139		1765.28	0.00150363		4838.32	0.00218667			9	10		10	10
																									7.52168	0.00217559		4.24457	0.00220419		4.65702	0.00109181		7.39737	0.00228774		1793.3	0.00156079		4515.91	0.00226392			6	10		10	10
																									4.09448	0.00208511		4.47252	0.00216028		4.69423	0.00112595		7.39446	0.0020465		1750.78	0.00158325		4347.47	0.00239869			10	10		10	10
																									4.41787	0.00208552		4.49208	0.00208753		4.70049	0.00116715		7.22682	0.00187326		1753.37	0.00157172		4071.12	0.00245968			10	10		10	10
																									4.4243	0.0020594		4.61503	0.00210219		4.69742	0.00119478		7.09411	0.00171185		1764.91	0.00157849		3816.65	0.0025917			10	10		10	10
																									4.29949	0.00208454		4.54732	0.00210072		4.70792	0.00121519		6.92108	0.0015552		1589.41	0.0015968		3575.66	0.0026217			10	10		10	10
																									4.03756	0.00206582		4.56042	0.00207169		4.52834	0.00119051		5.64294	0.00144402		1491.34	0.00167678		3552.86	0.00258237			10	10		10	10
																									4.00573	0.00201011		4.14528	0.00204942		4.40082	0.00118227		6.11815	0.0014398		1458.71	0.00174062		3524.81	0.00254304			10	10		9	10
																									3.83179	0.00194561		7.83674	0.00192404		4.15459	0.00117468		5.28989	0.00140299		1395.43	0.00179642		3486.37	0.00254449			10	10		5	10
																									3.5178	0.00194738		7.98811	0.00194265		3.55427	0.00118471		6.4718	0.00145543		1355.11	0.00189404		3375.09	0.00254945			10	10		6	10
																									3.27895	0.00200004		8.42543	0.00193555		3.32469	0.00119591		6.93686	0.0014696		1379.24	0.00194768		3268.79	0.00258699			10	10		5	10
																									4.32936	0.00207174		5.27108	0.00188395		2.97395	0.00117231		8.57216	0.00148447		1314.5	0.00199223		3098.72	0.00260467			10	10		8	10
																									5.31339	0.0020849		5.31926	0.00190122		2.82012	0.00114497		9.21282	0.00156364		1286.99	0.00207654		2919.71	0.00265387			10	10		8	10
																									5.38242	0.00211172		5.75413	0.00183432		2.49621	0.0011092		9.23923	0.00161634		1370.68	0.00208968		2638.52	0.00271598			10	10		8	10
																									5.23606	0.00209219		8.26967	0.00180152		2.36385	0.00104975		9.41408	0.00179724		1345.09	0.00219676		2395.56	0.0027728			10	10		5	10
																									5.363	0.00206567		5.75541	0.00189008		2.30574	0.000967122		9.46181	0.00192453		1352.63	0.00223471		2232.15	0.00284064			10	10		8	10
																									5.35936	0.00207895		5.82132	0.00197342		2.2808	0.000893661		9.37542	0.00212001		1219.78	0.00221068		1956.9	0.00289645			10	10		8	10
																									5.38221	0.0020321		5.90224	0.00202934		1.94174	0.000838576		9.29965	0.00229198		1123.03	0.00222366		1894.18	0.00294589			10	10		8	10
																									5.31581	0.00197961		5.90699	0.0021041		1.78878	0.000792666		9.03036	0.00243186		1105.84	0.00217397		1836.16	0.00296773			10	10		8	10
																									5.36067	0.00201112		5.72987	0.00211145		1.68163	0.000735046		9.39827	0.00259275		1073.47	0.00213856		1754.07	0.00301075			10	10		8	10
																									5.19917	0.00201581		5.6871	0.0021409		7.34341	0.000706058		9.22958	0.00272159		1068.34	0.00219945		1706.84	0.00295401			10	10		8	10
																									5.1447	0.00203291		5.49201	0.00214619		7.01026	0.0006738		8.10474	0.00289674		1072.08	0.00221282		1668.36	0.00284301			10	10		9	10
																									4.93938	0.0020565		5.35942	0.0021727		7.65717	0.000639845		8.16253	0.00300226		1061.04	0.00232011		1688.39	0.00283388			10	10		8	10
																									4.77198	0.00207109		5.3063	0.00219109		8.67534	0.000630547		8.71823	0.00304474		1020.85	0.00238636		1717.09	0.00276994			10	10		8	10
																									5.14918	0.00210491		5.18806	0.00219609		8.59348	0.000598504		8.56922	0.00309815		954.995	0.00239272		1725.74	0.00269461			10	10		8	10
																									5.34246	0.00212006		5.09696	0.00219496		8.32079	0.000596847		8.67961	0.00312952		910.043	0.00248015		1794.85	0.00272507			10	10		8	10
																									5.65481	0.00220007		4.81	0.00219445		7.91477	0.000578031		8.65718	0.00316067		879.489	0.00246294		1778.95	0.00276293			10	10		8	10
																									5.64394	0.00229814		4.76989	0.00219597		7.77668	0.000553867		8.52936	0.00316829		863.339	0.00244624		1802.93	0.00271691			10	10		8	10
																									6.01139	0.00231717		4.07352	0.00224542		7.96834	0.000504885		7.49916	0.00321852		821.902	0.00239008		1792.72	0.00272421			10	10		9	10
																									6.0822	0.00227073		3.76088	0.00225432		7.87473	0.000466763		6.94743	0.0031875		790.626	0.00236306		1775.58	0.00272517			10	10		9	10
																									6.50074	0.00219645		3.39344	0.00219878		2.06876	0.000436066		5.54314	0.00321561		802.313	0.00237012		1733.24	0.00268858			10	10		9	10
																									4.81956	0.00213104		3.49015	0.00223515		2.25728	0.000420084		4.40706	0.0032123		815.736	0.00241961		2088.73	0.00282926			10	10		10	10
																									5.15449	0.00207388		3.48258	0.00229322		2.32394	0.000402722		4.27485	0.00319019		732.784	0.00243609		2300.77	0.00281775			10	10		10	10
																									5.19087	0.00206294		2.7822	0.0023752		2.30812	0.00037587		4.34284	0.0031539		692.393	0.00244729		3217.6	0.00276622			10	10		10	10
																									5.66291	0.00206627		2.85985	0.00241587		2.22641	0.000371162		5.16111	0.00307119		655.798	0.00242778		3538.57	0.00275835			10	10		10	10
																									5.94068	0.00201911		3.15358	0.00245149		2.07591	0.000387684		5.37119	0.0029945		603.841	0.00242897		3578.35	0.00267718			10	10		10	10
[truncated: 18 more columns]

## Sheet: Fig3 B, F,G,K,L,Q
Fig3B					Fig3F							Fig3G						Fig3K							Fig3L								Fig3Q
Firing rate vs. Burst Rate					VSS dFrequency to motion							VSS SNR						AutoCorr dFrequency to motion							AutoCorr SNR								Polarity Index
Motion Freq	Firing Rate	Burst Rate			VSS 10%	VSS 20%	VSS 40%	VSS 80%	DCN LFP			VSS 10%	VSS 20%	VSS 40%	VSS 80%			Xcorr 10%	Xcorr 20%	Xcorr 40%	Xcorr 80%	DCN LFP			Xcorr 10%	Xcorr 20%	Xcorr 40%	Xcorr 80%					16 Hz	16 Hz (Shuffle)
8	63.1778	4.74			-6.74	-6.74	-6.74	0	0			16.2682	19.3523	20.929	55.2441			-0.0319361	-0.0319361	-0.0319361	-0.0319361	0			1551.06	4283.52	8645.68	9128.26					0.0177339	0.0234879
8	34.1556	2.04			0.02	0.02	0.02	-0.01	0			42.3724	26.1932	56.1336	49.7231			-0.0319361	-0.0319361	-0.0319361	-0.0319361	0			1189.36	2280.96	4990.28	8706.5					0.0199654	0.0238794
8	89.8222	6.57			-7.31	-0.01	-0.01	0	0			18.0871	43.808	52.1925	52.8437			-0.0319361	-0.0319361	-0.0319361	-0.0319361	0			1148.06	2271.33	3544.92	8785.78					0.0131313	0.0247844
8	42.7778	3.2			0	0.02	0	-0.01	0			16.5496	25.2761	38.3851	42.0994			-0.0319361	-0.0319361	-0.0319361	-0.0319361	0			1776.37	3055.88	4643.38	10136.8					0.00546839	0.0224996
8	3.53333	0			-6.56	-7.47	0	-0.01	0			11.9667	36.2349	35.5156	51.62			-0.0319361	-0.0319361	-0.0319361	-0.0319361	0			1373.51	3419.01	6363.37	7341.52					0.0126624	0.0243757
8	4.55556	0			0.02	0.01	-0.02	0	0			39.6019	57.1761	58.5306	87.9801			-0.0319361	-0.0319361	-0.0319361	-0.0319361	0			1537.69	3191.43	3740.05	5533.65					0.0507287	0.0309268
8	5.42222	0.02			11.06	-0.04	0.01	-0.01	0			34.8702	33.1217	45.9939	46.9432			-0.0319361	-0.0319361	-0.0319361	-0.0319361	0			701.452	1534.23	2614.89	5846.54					0.0314934	0.0232788
8	6.6	0			-12.12	0.01	-0.03	0	0			18.2423	33.5084	44.8796	68.3395			-0.0319361	-0.0319361	-0.0319361	-0.0319361	0			1411.08	2032.66	7736.98	9694.84					0.0212017	0.0186378
8	9.4	0.02			-8.79	-9.41	0	0				20.9994	29.0952	39.1156	62.6915			-0.0319361	-0.0319361	-0.0319361	-0.0319361				1739.45	2510.09	6353.15	9106.63					0.0227733	0.0203304
8	9.33333	0.01			0.04	-0.06	6	0				26.4812	20.3674	25.0592	52.901			-0.0319361	-0.0319361	-0.0319361	-0.0319361				1338.32	1674.34	3859.61	8143.78					0.0163135	0.0203291
8	9.88889	0.02			5.52	5.87	-6.62	-0.01				26.6767	43.878	56.8433	60.0482			-0.0319361	-0.0319361	-0.0319361	-0.0319361				752.559	1890.77	3276.14	6853.13					0.0289727	0.0280848
8	7.28889	0			-7.01	-0.01	-0.01	0				18.8454	27.8559	51.7946	72.0376			-0.0319361	-0.0319361	-0.0319361	-0.0319361				2000.12	4205.05	4280.01	7232.4					0.0347359	0.0316128
8	7.15556	0.03			-0.05	-6.58	-6.6	-6.69				54.2151	52.0701	35.0752	55.7175			-6.51896	-0.0319361	-0.0319361	-0.0319361				1397.62	2725.43	5570.26	9563.53					0.00577694	0.0163981
8	7.62222	0.02			8.42	-0.01	0	0				15.8568	36.2468	41.6302	102.197			-0.0319361	-0.0319361	-0.0319361	-0.0319361				1155.08	2870.31	4556.43	6234.9					0.0257892	0.024157
8	22.1556	0.51			-10.64	10.46	-0.01	-0.01				8.91388	21.2386	26.4958	83.2419			-0.0319361	-0.0319361	-0.0319361	-0.0319361				1052.26	2127.44	3414.36	6644					0.0438357	0.0253239
8	23.0667	0.61			0	-6.54	-0.01	-0.01				18.395	20.3266	60.1129	72.0215			-0.0319361	-0.0319361	-0.0319361	-0.0319361				1041.25	2811.41	4883.1	9272.67					0.00661528	0.023884
8	39.2222	2.75			2.59	0.02	0	-6.69				12.5981	36.2283	59.2913	73.7073			-0.0319361	-0.0319361	-0.0319361	-0.0319361				2862.11	3906.75	6202.25	8716.42					0.0392864	0.0219128
8	22.5556	1.44			-9.45	0	-0.02	-0.01				23.4909	36.0477	52.926	83.3018			-0.0319361	-0.0319361	-0.0319361	-0.0319361				1506.93	4635.3	5640.56	5478.91					0.0418529	0.0245492
8	7.26667	0.01			-0.06	-4.02	-0.01	-0.01				9.22982	20.832	38.4494	50.6052			-0.0319361	-0.0319361	-0.0319361	-0.0319361				1557.29	2715.59	4089.19	7143.71					0.0202087	0.0215619
8	7.08889	0			6.42	0.01	-0.01	0				16.0304	45.9643	41.2733	62.7089			-0.0319361	-0.0319361	-0.0319361	-0.0319361				666.519	1476.09	4514.19	6779.89					0.0308708	0.0247814
8	7.44444	0			9.4	-6.79	-0.02	-0.01				19.1595	27.7654	64.3043	101.922			-0.0319361	-0.0319361	-0.0319361	-0.0319361				760.125	1580.57	3321.42	7424.16					0.138851	0.0223938
8	14.9556	0.1			-10.24	0	0	0				11.1065	21.5921	40.947	52.5707			-0.0319361	-0.0319361	-0.0319361	-0.0319361				811.152	1797.23	4937.49	9957.76					0.0427253	0.0271772
8	14.0444	0.18			0	5.87	-0.02	0				20.188	15.9939	43.9043	48.3961			-7.01796	-0.0319361	-0.0319361	-0.0319361				1159.49	2756.08	9063.74	9592.92					0.03757	0.0276626
8	15.2222	0.18			-6.53	-6.79	-0.01	-6.74				17.8224	16.7711	34.8575	52.6512			-0.0319361	-0.0319361	-0.0319361	-0.0319361				804.817	1499.78	6013.2	6839.18					0.0293419	0.0227717
8	15.9778	0.24			0	-0.01	0	-0.01				46.5934	29.9578	25.4029	66.4743			-0.0319361	-0.0319361	-0.0319361	-0.0319361				1657.58	2943.57	5708.14	7558.28					0.123085	0.0185556
8	17.0889	0.18			10.42	-9.07	-0.01	-0.01				19.2418	36.6582	43.0091	46.6096			-0.0319361	-0.0319361	-0.0319361	-0.0319361				1501.17	2207.92	4744.92	7145.9					0.0305649	0.0235407
8	21.4	0.28			-0.02	-0.02	-0.02	-0.01				12.6634	16.3391	47.1964	66.66			-0.0319361	-0.0319361	-0.0319361	-0.0319361				2000.71	3155.52	5869.49	7010.35					0.024874	0.0242326
8	20.4444	0.37			0.02	10.18	-0.01	0				37.1429	32.7696	43.3447	67.8856			-0.0319361	-0.0319361	-0.0319361	-0.0319361				1777.24	2859.43	4325.14	8599.79					0.0270782	0.0288719
8	19.8444	0.4			-6.95	-0.01	-0.04	-0.01				22.0426	26.1739	41.8904	78.4631			-0.0319361	-0.0319361	-0.0319361	-0.0319361				1490.98	2531.82	4976.89	10072.6					0.0213401	0.0191505
8	34.4667	1.41			-3.31	5.58	0	0				20.7844	75.5161	102.418	67.4612			-0.0319361	-0.0319361	-0.0319361	-0.0319361				2204.72	2520.75	4352.53	7440.06					0.0171947	0.0225939
8	33.8	1.39			0.04	10.34	6.7	0				29.7589	41.3677	47.4507	53.8599			-0.0319361	-0.0319361	-0.0319361	-0.0319361				1621.09	2689.89	7154.39	8570.24					0.0106502	0.0258288
8	61.2	4.43			8.35	-0.04	0	0.01				8.85794	23.537	42.2562	53.7348			-0.0319361	-0.0319361	-0.0319361	-0.0319361				955.702	3118.45	4168.11	7687.17					0.0344125	0.0184971
8	32.2667	2.16			-6.79	-0.01	-0.01	0				30.3695	51.2146	77.7683	68.4065			-0.0319361	-0.0319361	-0.0319361	-0.0319361				1214.41	3194.32	4396.24	9010.8					0.0719917	0.0302927
8	6.8	0			0	-6.86	0	0				30.2863	26.2491	33.8902	70.4762			-0.0319361	-0.0319361	-0.0319361	-0.0319361				1444.42	2505.98	5127.2	10642.5					0.0151029	0.0291913
8	6.91111	0.04			6.94	-0.02	-0.02	0				27.2125	31.1769	38.0782	45.1858			-0.0319361	-0.0319361	-0.0319361	-0.0319361				1613.69	4900.1	5401.9	9448.04					0.0444916	0.0212535
8	31.8444	1.14			-0.02	-0.02	-6.62	0				34.0582	51.9401	41.0208	75.8789			-0.0319361	-0.0319361	-0.0319361	-0.0319361				1001.65	2712.65	5032.49	7572.23					0.0784338	0.0263722
8	31.5333	1.11			-9.11	0	0	0				35.3353	67.0604	120.697	101.379			-0.0319361	-0.0319361	-0.0319361	-0.0319361				1399.25	2154.21	4989.48	10773.7					0.0287772	0.0219087
8	16.8889	0.2			0.02	-0.02	-0.01	0				26.4904	41.7233	41.616	74.9772			-0.0319361	-0.0319361	-0.0319361	-0.0319361				2014.34	2534.62	3071.71	6197.15					0.067376	0.0180753
8	16.9556	0.15			0.01	-6.51	0	0				10.8289	22.9435	30.6714	41.1228			-0.0319361	-0.0319361	-0.0319361	-0.0319361				1153.58	2570.59	4860.68	8887.75					0.0236515	0.0237297
8	24.8889	0.54			5.83	-0.02	0.02	-0.01				17.8308	24.7952	38.5082	61.2292			-0.0319361	-0.0319361	-0.0319361	-0.0319361				1042.38	3277.18	6392.05	8729.83					0.126468	0.0322566
8	25.4444	0.64			10.53	4.14	0.01	0				26.4175	25.7086	47.7865	60.5877			-0.0319361	-0.0319361	-0.0319361	-0.0319361				794.893	1254.79	3123.92	9459.19					0.100666	0.0340404
8	25.4	0.56			-10.5	10.35	0	-0.01				14.377	28.5937	58.0273	64.1063			-0.0319361	-0.0319361	-0.0319361	-0.0319361				2708.88	2645.59	5314.02	9417.61					0.182668	0.0364966
8	22.7111	0.55			-5.61	0.01	-0.01	-0.01				9.9455	8.4983	31.2776	51.2936			-0.0319361	-0.0319361	-0.0319361	-0.0319361				3469.11	3865.34	6127.98	10808.9					0.0158328	0.0351207
8	22.4	0.54			-3.33	-0.02	0	0				17.8858	24.6883	42.8354	70.8199			-0.0319361	-0.0319361	-0.0319361	-0.0319361				1162.7	1925.07	3057.86	6416.42					0.0623611	0.0235239
8	79.9778	5.75			-0.04	7.74	0.01	-0.01				49.8843	29.9363	41.3	43.2065			-0.0319361	-0.0319361	-0.0319361	-0.0319361				1003.48	1415.46	3806.93	6862.52					0.0352537	0.026115
8	61.2889	3.84			-6.82	-9.23	-0.01	-0.01				11.5967	26.4663	31.7205	40.1755			-0.0319361	-0.0319361	-0.0319361	-0.0319361				779.711	1886.33	3946.6	6091.85					0.0258658	0.0230772
8	16.4667	0.13			0.01	0	-6.79	0				22.2182	17.3533	44.6201	62.6961			-0.0319361	-0.0319361	-0.0319361	-0.0319361				2027.86	3354.67	4908.96	7836.58					0.036075	0.028678
8	17	0.11			-8.75	6	0	-0.01				20.4963	32.793	35.9874	62.1013			-0.0319361	-0.0319361	-0.0319361	-0.0319361				940.034	1660.51	4390.11	7697.31					0.0145858	0.0138357
8	12.4222	0.14			-6.61	-7.46	-0.01	0				11.9924	19.1352	24.8729	43.6485			-0.0319361	-0.0319361	-0.0319361	-0.0319361				1207.19	2244.05	3472.76	9988.52					0.0449659	0.0256574
8	12.9111	0.05			0	0	-0.02	0				17.2148	21.934	33.9842	66.6593			-0.0319361	-0.0319361	-0.0319361	-0.0319361				2015.05	3052.23	4916.6	7799.58					0.028473	0.0256451
8	28.9111	0.84			5.96	-0.02	5.12	-6.69				20.4584	32.8814	40.6152	90.9411			-0.0319361	-0.0319361	-0.0319361	-0.0319361				1345.74	1733.87	3890.22	6853.98					0.0284682	0.0273387
8	29.6444	0.73			-3.84	0.03	-7.02	0				30.8277	35.7417	38.0147	53.0887			-0.0319361	-0.0319361	-0.0319361	-0.0319361				1449.38	2270.07	3333.29	6980.42					0.0525169	0.0233859
8	29.0222	0.99			-0.02	-0.04	0.01	-0.01				20.9843	35.1889	62.3239	60.3309			-0.0319361	-0.0319361	-0.0319361	-0.0319361				1744.37	2436.44	3365.04	8064.73					0.0191951	0.0240046
8	29.4444	0.74			4.58	5.11	-0.01	0				26.7403	31.0088	57.3708	82.2245			-0.0319361	-0.0319361	-0.0319361	-0.0319361				1309.66	2329.03	5088.56	8259.92					0.0688448	0.0264993
8	15.4667	0.15			-6.68	-10.14	0.01	0				16.5465	20.8108	38.3769	75.4287			-0.0319361	-0.0319361	-0.0319361	-0.0319361				1405.36	2872.97	4643.7	8534.74					0.133639	0.0149881
8	15.8889	0.21			-0.04	-6.9	-0.01	0				16.8094	22.9233	28.7511	59.2878			-0.0319361	-0.0319361	-0.0319361	-0.0319361				1990.4	3362.57	6488.23	7388.57					0.00987947	0.0220174
8	17.6222	0.24			-10.75	-0.02	-0.01	0				23.5827	46.8366	111.007	88.9347			-0.0319361	-0.0319361	-0.0319361	-0.0319361				1197.08	2737.55	5169.74	6778.19					0.0381434	0.0271611
8	20.2667	0.31			-7.64	12.17	0	0				25.504	37.7799	40.2274	61.9448			-0.0319361	-0.0319361	-0.0319361	-0.0319361				1204.37	2377.16	4501.18	8494.08					0.0827671	0.0307975
8	14.5333	0.1			-3.48	0	0.01	0				28.8914	26.6591	45.4722	64.0121			-0.0319361	-0.0319361	-0.0319361	-0.0319361				1336.28	2682.65	4411.51	8655.96					0.0600684	0.053236
8	13.4889	0.03			-0.08	4.09	0.02	-6.77				13.0798	24.6713	29.84	54.2881			-0.0319361	-0.0319361	-0.0319361	-0.0319361				1158.41	3290.35	5645.03	8813.28					0.0652726	0.0507949
8	14.5778	0.11			2.9	-6.6	-0.01	-0.01				11.3306	23.1807	28.1904	42.8247			-0.0319361	-0.0319361	-0.0319361	-0.0319361				1830.92	2448.82	3516.75	6774.28					0.099419	0.0512044
8	15.7778	0.14			-0.03	-0.01	0	0				22.1233	40.9793	43.708	41.6681			-0.0319361	-0.0319361	-0.0319361	-0.0319361				1051.45	1470.2	4079.3	7845.64					0.0509373	0.0450085
8	14.9556	0.11			9.13	0.01	-0.02	0				10.7624	11.919	24.2227	62.1533			-0.0319361	-0.0319361	-0.0319361	-0.0319361				1778.81	4333.22	5664.93	7307.03					0.0698215	0.0466829
8	15.3111	0.16			0	0.01	0	-6.69				38.0045	37.8749	53.6631	40.8947			-0.0319361	-0.0319361	-0.0319361	-0.0319361				1373.04	2140.22	4274.45	7626.21					0.104995	0.0460737
8	18.7556	0.22			12.38	0	0	0				25.834	30.401	28.4071	80.7962			-0.0319361	-0.0319361	-0.0319361	-0.0319361				1506	2081.91	3920.31	6843.96					0.0510763	0.0439565
8	18.7778	0.2			-6.86	-3.77	0.01	0				27.301	20.9246	43.4999	39.1249			-0.0319361	-0.0319361	-0.0319361	-0.0319361				661.836	1320.49	2885.79	7405.06					0.071474	0.0481093
8	18.7333	0.2			-0.04	0	-6.74	0				24.494	32.0532	58.9524	66.1927			-0.0319361	-0.0319361	-0.0319361	-0.0319361				1554.48	2330.62	6484.1	12399.2					0.0535595	0.0548141
8	19.8667	0.29			3.44	-6.53	-0.01	-0.01				31.6525	37.4392	50.1178	76.7171			-0.0319361	-0.0319361	-0.0319361	-0.0319361				1108.44	2319.02	5048.45	7295.21					0.0426661	0.0482318
8	20.4222	0.22			8.87	0	0.02	-0.01				22.1006	40.1059	31.0377	78.0509			-0.0319361	-0.0319361	-0.0319361	-0.0319361				1992.52	4229.65	5543.24	10924.4					0.107167	0.0465211
8	20.3778	0.33			12.1	-0.01	-6.69	-0.01				24.195	22.9527	38.8779	44.4082			-0.0319361	-0.0319361	-0.0319361	-0.0319361				1610.37	4060.29	7796.79	7433.81					0.0558027	0.0480458
8	19.9111	0.25			-8.8	6.02	-0.02	0				11.9414	13.0816	44.063	54.4975			-0.0319361	-0.0319361	-0.0319361	-0.0319361				1707.11	4277	5893.02	7166.55					0.0834635	0.0582065
8	19.4889	0.26			-0.01	-6.51	0	-0.01				15.4244	18.0037	65.6284	54.2819			-0.0319361	-0.0319361	-0.0319361	-0.0319361				1840.55	2840.43	4962.57	11031.1					0.0746171	0.0491246
8	21.7778	0.38			0.02	0	0	0				17.1615	29.9068	41.5992	41.3595			-0.0319361	-0.0319361	-0.0319361	-0.0319361				1182.64	1941.2	3168.35	7152.83					0.0627403	0.0522826
8	64.8444	5.63			-0.04	10.16	-6.63	0				10.1015	24.1462	55.7268	70.4088			-0.0319361	-0.0319361	-0.0319361	-0.0319361				1030.55	2086.83	4371.75	8814.63					0.0793762	0.0493247
8	20.6222	1.33			-7.32	-0.01	0	0				16.6935	23.5857	22.651	36.2302			-0.0319361	-0.0319361	-0.0319361	-0.0319361				3193.2	5193.78	4651.88	11230.6					0.0587269	0.0510121
8	34.8444	1.53			0.03	0.02	-0.01	-6.69				19.9488	29.1416	25.2413	44.9234			-0.0319361	-0.0319361	-0.0319361	-0.0319361				1218.1	2301.07	4584.65	7138.76					0.0634194	0.0492337
8	39.4444	2.42			-9.26	-9.08	0.01	0				20.3854	39.2416	33.1418	69.0431			-0.0319361	-0.0319361	-0.0319361	-0.0319361				1160.89	2460.51	4050.45	7168.85					0.108044	0.0449301
8	18.0889	0.21			-6.62	-3.52	-0.02	-6.82				24.2845	30.8694	31.3283	63.5998			-0.0319361	-0.0319361	-0.0319361	-0.0319361				798.998	1782.2	4229.32	7951.54					0.0539217	0.0549838
8	11.8667	0.26			-0.04	-0.04	-0.01	0				22.9639	43.4655	49.8888	59.362			-0.0319361	-0.0319361	-0.0319361	-0.0319361				2565.93	3258.74	8475.91	8798.65					0.039695	0.0475784
8	23.6	0.73			-10.14	4.05	-0.02	0				27.6459	92.8164	52.7396	73.3208			-0.0319361	-0.0319361	-0.0319361	-0.0319361				2166.54	4523.94	4618.62	8088.64					0.0596114	0.0501581
8	15.9333	0.2			-7.02	-7.16	-6.69	0				32.0605	36.7221	39.4249	80.5662			-0.0319361	-0.0319361	-0.0319361	-0.0319361				928.103	2617.54	3344.44	6650.04					0.125795	0.0489244
8	17.3111	0.2			0.02	0	0.01	0				20.6843	20.2111	31.768	54.2868			-0.0319361	-0.0319361	-0.0319361	-0.0319361				855.216	2121.66	6287.76	7357.98					0.037899	0.0514441
8	29.6	0.91			-0.02	-0.01	0.02	-6.63				28.759	53.5156	47.8663	61.6056			-0.0319361	-0.0319361	-0.0319361	-0.0319361				1909.3	2963.79	5197.09	7891.11					0.0579287	0.0502537
8	32.6444	1.18			4.09	5.2	-0.01	-0.01				49.1676	23.7563	23.1398	50.5211			-0.0319361	-0.0319361	-0.0319361	-0.0319361				1408.13	3356.65	4511.01	8708.92					0.0993604	0.0457244
8	29.4444	1.16			-6.49	-6.53	0.02	-0.01				13.5565	16.5748	22.3499	68.2747			-7.01796	-0.0319361	-0.0319361	-0.0319361				1787.1	2405.26	8315.04	6625.33					0.0402947	0.0500596
8	35.2222	1.89			-4.18	0.01	0	-6.78				22.317	30.9893	64.4353	78.5323			-0.0319361	-0.0319361	-0.0319361	-0.0319361				1980.07	2590.22	6252.94	6847.88					0.0504242	0.0487083
8	18.5111	0.42			0.01	9.39	-0.01	0				40.6527	24.8477	25.0079	33.3523			-0.0319361	-0.0319361	-0.0319361	-0.0319361				1341.67	2919.79	6248.05	8705.4					0.0857016	0.042432
8	21.3556	0.76			10.43	-0.02	-0.02	0				19.3825	24.7315	39.9155	68.8578			-0.0319361	-0.0319361	-0.0319361	-0.0319361				1922.12	2014.82	3880.87	7776.1					0.0817827	0.00850479
8	25.9111	0.74			-2.24	12.74	-0.03	0				13.2567	17.6967	36.0869	53.8463			-0.0319361	-0.0319361	-0.0319361	-0.0319361				2071.3	3538.06	4464.31	7801.42					0.0884985	0.012629
8	23.5778	0.63			0.04	-0.01	4.02	-0.01				13.1527	20.9181	20.4235	51.579			-0.0319361	-0.0319361	-0.0319361	-0.0319361				1242.87	2950.88	3620.94	7142.63					0.045105	0.00287071
8	25.9556	0.96			-6.45	0	-6.76	0				11.1158	23.1588	28.3384	61.2244			-0.0319361	-0.0319361	-0.0319361	-0.0319361				1757.2	2582.26	4309.66	9429.62					0.0409945	0.00774112
8	33.9778	1.63			0.04	0.01	0	-0.01				7.81715	20.8523	28.0335	76.3068			-0.0319361	-0.0319361	-0.0319361	-0.0319361				1244.08	2145.09	5217.71	7296.55					0.0199544	0.00897978
8	32.5111	1.33			5.27	0	6.99	-0.01				21.0628	22.8955	32.6339	57.0274			-0.0319361	-0.0319361	-0.0319361	-0.0319361				3369.03	3690.96	6929.89	10251.1					0.0318814	0.0105569
8	33.9556	1.57			-0.02	0.02	-6.63	0				39.0831	41.7852	40.1837	63.2632			-0.0319361	-0.0319361	-0.0319361	-0.0319361				2320.2	5742.42	4619.22	7969.84					0.0193676	0.00552132
8	21.6444	0.44			-1.94	-0.01	0	0				16.744	24.6488	33.2579	53.4715			-0.0319361	-0.0319361	-0.0319361	-0.0319361				1465.74	2991.98	7172.67	10550.6					0.0406402	0.010047
8	19.7556	0.41			0.06	-6.59	5.2	0				64.0305	24.906	36.8177	56.523			-0.0319361	-0.0319361	-0.0319361	-0.0319361				528.557	1533.73	4594.41	10131.8					0.0308646	0.00903665
8	22.3111	0.42			7.06	-0.04	0	-0.01				20.8159	25.6145	64.6094	50.2786			-0.0319361	-0.0319361	-0.0319361	-0.0319361				897.152	1971.46	5512.18	10537.1					0.0254075	0.0162845
8	32.2667	1.32			0	-0.04	-0.01	-6.62				17.1612	28.012	27.3824	44.6241			-0.0319361	-0.0319361	-0.0319361	-0.0319361				1020.54	4330.98	4833.72	9220.14					0.0663814	0.00737891
8	31	1.31			-4.05	2.69	-6.6	0				39.2808	30.9499	38.317	47.0171			-0.0319361	-0.0319361	-0.0319361	-0.0319361				1494.61	2438.9	4974.22	11495.5					0.0180899	0.0229187
8	32.0444	1.44			-0.01	-6.74	0.02	0				16.2381	19.1401	40.7157	74.1991			-6.51896	-0.0319361	-0.0319361	-0.0319361				1165.37	2224.85	6306.78	7576.75					0.0440312	0.0118297
8	59.6667	5.1			2.9	0.02	-0.01	0										-0.0319361															0.0297201	0.00629743
8	46.1556	2.99			12.44	0.03	-0.02	0										-0.0319361															0.0521969	0.00358794
8	70.1111	6.35			-6.51	-6.69	-6.69	0										-6.51896															0.0436567	0.00439748
8	85.7333	7.97			-2.35	0.02	0	0										-0.0319361															0.0484704	0.00412392
8	33.0667	2.58			-0.04	0.04	-9	-0.01										-0.0319361															0.0469953	0.00370819
8	19.6444	0.49			6.7	6.45	0.03	0				Table Analyzed	Vibration 16 Hz VSS SNR												Table Analyzed	Vibration 16 Hz Xcorr SNR							0.01836	0.0055734
8	23.9778	0.94			10.03	-0.06	5.27	-0.01																									0.0264992	0.0095602
8	20.8	0.6			-7.89	-0.02	-0.01	0				Friedman test													Friedman test								0.0173276	0.00256462
8	16.0444	0.73			-0.01	5.23	0	-0.01				P value	<0.0001												P value	<0.0001							0.0184677	0.0144892
8	27.5111	1.03			0.04	-0.01	-0.01	0				Exact or approximate P value?	Approximate												Exact or approximate P value?	Approximate							0.0211658	0.00708862
8	15.8	0.18			13.97	-6.74	-0.02	-0.01				P value summary	****												P value summary	****							0.0252705	0.013655
8	19.2667	0.53			-9.17	-3.85	0					Are means signif. different? (P < 0.05)	Yes												Are means signif. different? (P < 0.05)	Yes							0.0131789	0.023693
8	37.7778	2.03			-3.59	-0.01	6.88					Number of groups	4												Number of groups	4							0.0324737	0.0180832
8	43.4	3.21			-0.05	7.33	-6.74					Friedman statistic	213.3												Friedman statistic	292.9							0.0220066	0.0142838
8	21.5556	0.63			4.02	-0.03	0.01																										0.012354	0.0112447
8	19	0.46			-7.3	-6.89	-9.27					Data summary													Data summary								0.0263295	0.0194926
8	16.1778	0.58			-0.01	0.01	-6.51					Number of treatments (columns)	4												Number of treatments (columns)	4							0.0301156	0.0143844
8	33.3556	1.86			2.61	7.52	-0.02					Number of subjects (rows)	100												Number of subjects (rows)	100							0.0383235	0.0172315
8	30.5111	1.58			6.41	0	-6.47																										0.0271539	0.0218454
8	22.1556	1.01			12.67	-0.02	0																										0.00112164	0.0119996
8	34.2222	1.76			13.98	-0.02	-0.01																										0.0224533	0.0122254
8	28.6	1.29			0	0.01	-0.01					Multiple comparison													Multiple comparison								0.0180134	0.0153037
8	34.6	1.65			-6.46	0.03	0					Number of families	1												Number of families	1							0.00529791	0.0178151
8	20.8222	0.89			0.01	5.12	0					Number of comparisons per family	6												Number of comparisons per family	6							0.00567014	0.0115575
8	17.1111	0.7			0	-7.01	0.01					Alpha	0.05												Alpha	0.05							0.00888	0.00794827
8	10.6	0.4			-0.02	-3.29	0																										0.0167424	0.015416
8	21.7778	0.56			-3.56	0.02	0					Dunn's multiple comparisons test	Rank sum diff.	Significant?	Summary	Adjusted P Value									Dunn's multiple comparisons test	Rank sum diff.	Significant?	Summary	Adjusted P Value				0.0575728	0.0134357
8	17.7111	0.44			0	0.01	2.86					VSS 10% vs. VSS 20%	-64	Yes	**	0.0027	A-B								Xcorr 10% vs. Xcorr 20%	-100	Yes	****	<0.0001	A-B			0.0310996	0.0187501
8	19.2667	0.33			-7.53	0						VSS 10% vs. VSS 40%	-154	Yes	****	<0.0001	A-C								Xcorr 10% vs. Xcorr 40%	-200	Yes	****	<0.0001	A-C			0.0191043	0.012685
8	26.1111	1.12			0.02	2.81						VSS 10% vs. VSS 80%	-250	Yes	****	<0.0001	A-D								Xcorr 10% vs. Xcorr 80%	-296	Yes	****	<0.0001	A-D			0.0128881	0.0165393
8	26.2222	0.85			2.1	-0.01						VSS 20% vs. VSS 40%	-90	Yes	****	<0.0001	B-C								Xcorr 20% vs. Xcorr 40%	-100	Yes	****	<0.0001	B-C			0.0179784	0.0171917
8	29.6889	1.26			5.99	-0.04						VSS 20% vs. VSS 80%	-186	Yes	****	<0.0001	B-D								Xcorr 20% vs. Xcorr 80%	-196	Yes	****	<0.0001	B-D			0.0253354	0.0124167
8	32.6222	1.37			8.29	9.44						VSS 40% vs. VSS 80%	-96	Yes	****	<0.0001	C-D								Xcorr 40% vs. Xcorr 80%	-96	Yes	****	<0.0001	C-D			0.0114181	0.0187686
8	34.3778	1.72			-10.33	-0.03																											0.0226315	0.0163471
8	41.4667	2.66			0	-0.01						Test details	Rank sum 1	Rank sum 2	Rank sum diff.	n1	n2								Test details	Rank sum 1	Rank sum 2	Rank sum diff.	n1	n2			0.0464111	0.0138935
8	29.6667	1.46			5.29	0.01						VSS 10% vs. VSS 20%	133	197	-64	100	100								Xcorr 10% vs. Xcorr 20%	101	201	-100	100	100			0.00973145	0.0135788
8	18.2667	0.8			12.04	-6.84						VSS 10% vs. VSS 40%	133	287	-154	100	100								Xcorr 10% vs. Xcorr 40%	101	301	-200	100	100			0.0311195	0.0125787
8	15.2222	0.29			-6.51	0.01						VSS 10% vs. VSS 80%	133	383	-250	100	100								Xcorr 10% vs. Xcorr 80%	101	397	-296	100	100			0.0189733	0.0133111
8	10.2667	0.3			-0.01	-0.01						VSS 20% vs. VSS 40%	197	287	-90	100	100								Xcorr 20% vs. Xcorr 40%	201	301	-100	100	100
8	27.6444	1.34			-7.64	-6.6						VSS 20% vs. VSS 80%	197	383	-186	100	100								Xcorr 20% vs. Xcorr 80%	201	397	-196	100	100
8	21.3333	0.59			0	0.02						VSS 40% vs. VSS 80%	287	383	-96	100	100								Xcorr 40% vs. Xcorr 80%	301	397	-96	100	100
8	16.4667	0.58			-6.58	-0.03
8	39.9778	2.24			0	-8.87																											Table Analyzed	16 Hz
8	27.3778	1.38			13.86	-0.01
8	24.0444	1.16			-0.04	-6.6																											Column B	16 Hz (Shuffle)
8	38.5778	1.82			10.01	0.03																											vs.	vs.
8	30.8222	1.67			-6.82	5.11																											Column A	16 Hz
8	21.1333	1.02			0.02	0.03
8	47.2889	3.2			-0.02	-6.79																											Wilcoxon matched-pairs signed rank test
8	35.9333	2.06			-6.88	-0.02																											P value	<0.0001
8	45.1556	3.12			-3.04	0.01																											Exact or approximate P value?	Exact
8	115.778	8.28			0.03	12.15																											P value summary	****
8	51.7333	4.11			0.08	-0.02																											Significantly different (P < 0.05)?	Yes
8	35.7111	2			0	-0.02																											One- or two-tailed P value?	Two-tailed
8	30.9556	1.05			-4.01	6.45																											Sum of positive, negative ranks	1450 , -8141
8	29.1778	1.16			-0.05	-8.76																											Sum of signed ranks (W)	-6691
8	27.5556	0.97			2.09	0.02																											Number of pairs	138
8	27.9778	1.02			4.09	-6.91																											Number of ties (ignored)	0
8	34.1111	1.4			8.72	0.02
8	32.9111	1.34			-9.51	6.16																											Median of differences
8	18.0222	0.78			-6.46	-0.02																											Median	-0.009296
8	29.6444	0.94			0.02	-8.87
8	38.7111	1.76			6.56	-6.35																											How effective was the pairing?
8	27.5778	0.99			-3.76	0.02																											rs (Spearman)	0.4442
8	21.0444	0.97			-0.03	-0.01																											P value (one tailed)	<0.0001
8	53.8889	3.63			10.07	-0.01																											P value summary	****
8	46.0222	3.3			-0.03	0.02																											Was the pairing significantly effective?	Yes
8	32.6889	1.95			-6.91	5.59
8	40.1556	2			-0.01	-0.01
8	29.8222	1.47			0	2.8
8	23.5556	1			7.9	0
8	21.0222	1.11			-0.04	-9.19
8	12.1333	0.65			-7.31	-6.61
8	21.8444	0.68			-3.82	0.02
8	25.1333	0.53			0	7.58
8	9.6	0.02			-6.56	-3.72
8	9.15556	0.03			0.01	0
8	21.2889	0.61			6.18	2.9
8	21.7778	0.67			10.45	5.87
8	19.8	0.46			-7.92
8	17.2889	0.29			0
8	17.6222	0.25			-7
8	11.3556	0.13			-3.22
8	15.8	0.27			-0.03
8	82.1333	7.04			-6.6
8	53.2889	3.67			0.01
8	12.0889	0.05			5.14
8	11.7111	0.06			-9.39
8	13.1556	0.09			-0.02
8	37.9111	1.79			6.36
8	37.5556	2.06			-8.79
8	39.1778	1.91			-0.04
8	11.6667	0.1			-10.3
8	9.77778	0.01			-9.09
8	16.6222	0.27			-0.02
8	18.3556	0.25			9.49
8	21.6	0.47			-0.07
8	23.4222	0.58			-6.93
8	15.7333	0.28			-0.02
8	16.2667	0.31			0.01
8	35.4222	1.83			8.39
8	36.2667	1.78			-6.89
8	34.7556	1.66			0.01
8	35.1556	2.15			-0.02
8	31.9556	1.37			7.8
8	46.2444	3.19			-6.68
8	42.1556	2.27			0.05
8	32.1333	1.77			6.16
8	31.7333	1.25			-0.03
8	101.578	8.2			-8.83
8	66.0444	4.8			0.01
8	38.7111	2.16			-6.56
8	36.7556	1.98			0.04
8	36.1111	2.11			5.24
8	46.8667	3.18			-0.01
8	47.2444	2.77			4.21
8	43.8444	3.04			-0.04
8	31.8444	1.92			12.85
8	26.8889	1.15			0.02
8	19.3111	0.46			-9.41
8	19.7778	0.33			-3.82
8	19.1556	0.33			0
12	71.8889	6.10185			8.86
12	43.9556	2.99074			12.64
12	99.5778	6.87963			-10.69
12	54.6444	4.06481			-5.06
12	3	0			-0.02
12	4.57778	0			6.69
12	5.28889	0			9.83
12	6.37778	0.0185185			-8.76
12	9.75556	0.0185185			0.02
12	9.42222	0.0555556			8.51
12	8.86667	0.0185185			-7.26
12	6.8	0			0.02
12	8.35556	0.00925926			2.15
12	7.6	0.0277778			6.06
12	21.3556	0.435185			-12.5
12	22.2444	0.611111			-9.5
12	51.5111	3.59259			-0.05
12	32.4444	2.06481			5.09
12	7.37778	0.00925926			9.53
12	6.66667	0.00925926			-8.87
12	7	0			-6.35
12	14.0444	0.175926			0.06
12	14.4444	0.0925926			0.03
12	14.9333	0.111111			-6.87
12	15.5778	0.203704			-0.01
12	16.5778	0.231481			5.26
12	19.9333	0.37037			0.04
12	20.8222	0.333333			-0.01
12	21.2667	0.351852			12.68
12	36.3778	1.72222			-0.02
12	35.4444	1.40741			-6.67
12	77.3111	5.55556			0.02
12	47.3778	2.72222			7.52
12	7.48889	0.0185185			-7.42
12	7.46667	0.0185185			-3.07
12	33.1778	1.37963			0
12	32.0444	1.2037			6
12	17.7778	0.25
12	17	0.212963
12	26.7333	0.731481
12	26.7111	0.759259
12	27.6444	0.787037
12	22.8444	0.583333
12	21.8889	0.546296
12	90.6	6.92593
12	68.0667	4.48148
12	16.6222	0.138889
12	15.9778	0.175926
12	12.2667	0.0648148
12	13.2	0.0925926
12	31.0667	0.962963
12	29.4667	0.953704
12	31.3111	1.12037
12	29.6667	1.00926
12	17.1778	0.277778
12	17.9333	0.277778
12	20.8667	0.444444
12	21.7556	0.518519
12	14.7556	0.12963
12	15.7111	0.0925926
12	16.3111	0.148148
12	15.5556	0.12963
12	17.8	0.12037
12	16.7333	0.157407
12	20.1778	0.333333
12	21.6667	0.472222
12	21.1111	0.37963
12	22.8889	0.435185
12	23.2889	0.444444
12	22.7556	0.435185
12	22.1778	0.444444
12	20.7556	0.398148
12	21.1778	0.398148
12	78.0889	7.60185
12	30.5111	2.62963
12	41.2444	2.43519
12	46.1333	2.85185
12	20.9111	0.425926
12	15.8222	0.546296
12	28.6889	0.87963
12	16.9333	0.166667
12	19.0667	0.324074
12	33.8889	1.32407
12	36.9778	1.71296
12	37.9333	1.4537
12	41.2889	1.96296
12	25.6444	0.62963
12	26.6667	0.898148
12	27.8	0.787037
12	28.3111	0.777778
12	28.9556	0.777778
12	36.2222	1.42593
12	35.7556	1.43519
12	37.4889	1.33333
12	23.4	0.481481
12	24.3111	0.5
12	25.6222	0.592593
12	35.4667	1.47222
12	37.2	1.47222
12	37.5556	1.48148
12	61.5111	4.87963
12	48.2444	2.7037
12	69.4667	6
12	103.133	8.05556
12	38.9333	2.80556
12	23.4667	0.527778
12	27.4	0.851852
12	24.4222	0.583333
12	15.7778	0.472222
12	31.4667	0.972222
12	20.8889	0.444444
12	23.3111	0.388889
12	45.3333	2.0463
12	49.8889	2.76852
12	18.9778	0.435185
12	13.8444	0.509259
12	12.5333	0.546296
12	34.1333	1.68519
12	25.5111	1.60185
12	17.9333	1.14815
12	34.2889	1.55556
12	26.2	1.17593
12	38.8889	1.7963
12	14.2	0.648148
12	10.4	0.583333
12	6.13333	0.398148
12	21.6667	0.472222
12	15.5111	0.425926
12	17.2222	0.407407
12	29.3778	1.09259
12	26.5778	0.953704
12	32.7333	1.27778
12	33.4444	1.44444
12	41.4	1.77778
12	43.0444	2.77778
12	31.8667	1.86111
12	18.4667	0.546296
12	11.2667	0.333333
12	7.71111	0.324074
12	30.4222	1.07407
12	17.2889	0.462963
12	13.5556	0.638889
12	37.3111	2.0463
12	31.2667	1.26852
12	28.3778	1.15741
12	33.3778	1.51852
12	32.8	1.49074
12	25.4222	0.972222
12	48.9556	3.0463
12	38.3333	1.87963
12	46.5333	2.7963
12	135.556	8.87963
12	70.7111	4.93519
12	35.8667	1.66667
12	33.3778	1.12963
12	33.0889	1.27778
12	30.3333	0.990741
12	27.4	0.842593
12	33.6444	1.34259
12	36.7333	1.41667
12	22.6667	0.472222
12	33.4889	1.08333
12	35.5556	1.52778
12	29.3778	0.981481
12	26.8889	0.935185
12	45.9778	3.28704
12	49.3333	3.27778
12	37.8889	2.08333
12	36.9556	1.86111
12	32.1333	1.46296
12	27.8222	1.10185
12	20.2444	1.37963
12	11.3778	0.638889
12	20.3556	0.444444
12	23.0889	0.453704
12	9.82222	0.0740741
12	10.1111	0.00925926
12	23.2444	0.407407
12	21.1556	0.527778
12	21.0889	0.361111
12	16.4	0.305556
12	16.8	0.222222
12	11.4444	0.175926
12	16.8222	0.222222
12	83.8889	7.01852
12	53.6	3.78704
12	12.0667	0.138889
12	11.7333	0.101852
12	12.2889	0.12037
12	37.8444	1.80556
12	37.7333	1.88889
12	37.9111	1.71296
12	10.0889	0.166667
12	8.8	0.0740741
12	17.6667	0.314815
12	19.6222	0.314815
12	22.6667	0.481481
12	24.2667	0.592593
12	16.0667	0.240741
12	18.2444	0.240741
12	36.4889	2.05556
12	32.1556	1.69444
12	36.4667	2.08333
12	34.6	1.75
12	33.5778	1.36111
12	44.7778	2.83333
12	43.3556	2.27778
12	30.4222	1.44444
12	34.7111	1.47222
12	114.867	8.91667
12	70.8	5.74074
12	33.5778	1.22222
12	33.6889	1.25
12	31.8889	1.05556
12	45.1111	2.62963
12	46.3778	2.57407
12	44.1778	2.61111
12	32.7333	1.49074
12	26.5556	1.0463
12	20.6667	0.342593
12	20.8	0.342593
12	18.6444	0.305556
16	68.4889	5.19444
16	40.0222	2.13889
16	94.8	6.05556
16	46.3333	2.81481
16	2.62222	0.00925926
16	3	0
16	4.66667	0.0462963
16	5.53333	0
16	8.35556	0.0277778
16	8.73333	0.0462963
16	9.08889	0.037037
16	6.57778	0
16	6.64444	0.0277778
16	7.84444	0.0277778
16	18.1111	0.62037
16	19.4	0.453704
16	44.5333	2.87963
16	26.9333	1.43519
16	5.77778	0
16	5.88889	0
16	6.68889	0.0185185
16	13.7778	0.175926
16	12.7556	0.0925926
16	14.3111	0.166667
16	14.6444	0.175926
16	15.8222	0.222222
16	19.6889	0.444444
16	19.8667	0.453704
16	19.6667	0.37963
16	40.4	1.9537
16	37.4889	1.52778
16	63.9111	4.62963
16	30.0889	2.10185
16	10	0.0648148
16	9.93333	0.12037
16	35.3333	1.60185
16	37.6	1.59259
16	19.1333	0.314815
16	19.2222	0.361111
16	26.4889	0.740741
16	24.7556	0.62963
16	25.8222	0.685185
16	25.3778	0.703704
16	25.1333	0.777778
16	82.2444	6.36111
16	56.7333	4.02778
16	19.1778	0.268519
16	18.4889	0.212963
16	14.5333	0.148148
16	14.9556	0.111111
16	35.1111	1.34259
16	33.2	1.33333
16	34.1778	1.25
16	32.8444	1.25
16	21.8222	0.425926
16	24.3111	0.564815
16	37.9333	1.87037
16	45.0444	2.24074
16	19.2	0.305556
16	18.2	0.231481
16	19.1556	0.259259
16	20.5556	0.342593
16	20.2444	0.296296
16	20.5556	0.324074
16	27.3556	0.62963
16	25.5111	0.583333
16	25.8667	0.62963
16	26.2222	0.777778
16	28.9111	0.805556
16	26.8889	0.694444
16	27.9778	0.685185
16	26.4444	0.740741
16	27.3778	0.703704
16	88.3778	7.99074
16	37.7556	3.76852
16	51.3111	3.65741
16	57.4444	4.25926
16	26.2222	0.675926
16	21.5556	1.05556
16	36	1.66667
16	24.3111	0.583333
16	26.4222	0.62963
16	43.4444	2.28704
16	46.5111	2.62963
16	48.4889	2.24074
16	49.4444	2.60185
16	29.4444	0.768519
16	33.9333	1.0463
16	34.6	1.07407
16	35.7778	1.06481
16	35.7111	1.19444
16	46.1778	1.99074
16	44.4444	2.07407
16	45.7778	2.23148
16	32.8889	0.935185
16	31.3778	0.796296
16	31.3556	0.907407
16	45.3333	1.96296
16	45.6	1.87963
16	44.9111	2.17593
16	67.7778	5.09259
16	54.5111	3.47222
16	72.3556	6.37037
16	113.689	8.28704
16	50.9333	3.16667
16	28.6444	0.703704
16	34.6667	1.37963
16	28.4889	0.768519
16	20.6667	0.601852
16	37.6222	1.50926
16	23.8667	0.37037
16	29.1333	0.657407
16	50.6	2.62037
16	57.8444	3.65741
16	18.8444	0.509259
16	18.4222	0.555556
16	16.2667	0.638889
16	37.4667	2.60185
16	31.1556	1.83333
16	24.8444	1.36111
16	37.0222	2.01852
16	28.5333	1.53704
16	39.6444	2.2963
16	15.6889	0.759259
16	14.7778	0.768519
16	7.46667	0.425926
16	23.4444	0.666667
16	20.1333	0.805556
16	20.7111	0.546296
16	30.8222	1.35185
16	30.0222	1.30556
16	33.2444	1.28704
16	35.4	1.77778
16	40.3556	2.39815
16	45.7111	3.12037
16	34.2667	2.17593
16	22.1778	1.11111
16	15.4	0.490741
16	11.5778	0.490741
16	29.6222	1.41667
16	20.8222	0.898148
16	17.8222	0.703704
16	45.2667	2.27778
16	38.6222	1.7963
16	35.3333	1.77778
16	42.9111	2.06481
16	40.6667	1.75926
16	33.5333	1.40741
16	53.0889	3.62963
16	46.8	2.65741
16	53.1556	3.50926
16	146.311	8.63889
16	80.1778	4.99074
16	39.8	1.64815
16	35.9778	1.52778
16	36.2444	1.50926
16	35.5556	1.44444
16	35.5111	1.31481
16	40.2667	1.75
16	37.5778	1.56481
16	26.7111	1.06481
16	35.4889	1.51852
16	38.6889	1.62037
16	34.7778	1.4537
16	32.3556	1.44444
16	58.2	4.25
16	56.6667	4.07407
16	47.6444	2.99074
16	40.7556	2.09259
16	38.1111	1.52778
16	33.9111	1.50926
16	22.1556	1.43519
16	11.5111	0.638889
16	23.1111	0.592593
16	24.9111	0.712963
16	10.6444	0.0462963
16	10.9778	0.0462963
16	22.3556	0.731481
16	22.3111	0.666667
16	21.5111	0.481481
16	18.9333	0.342593
16	20.6667	0.407407
16	15.2444	0.194444
16	19.4	0.277778
16	92.0667	8.41667
16	59.8	4.64815
16	14.5333	0.0648148
16	14.4	0.0648148
16	14.5333	0.12963
16	43.3556	2.17593
16	43.2222	1.94444
16	44.9778	2.35185
16	15.9333	0.203704
16	12.2	0.0740741
16	18.5778	0.324074
16	18.9556	0.361111
16	24.7333	0.675926
16	24.4444	0.509259
16	18.3556	0.240741
16	18.8444	0.361111
16	35.5333	1.58333
16	29.8222	1.50926
16	33.2	1.33333
16	35.8667	1.75
16	33.5111	1.21296
16	44.4889	3.09259
16	41.0444	2.25926
16	30.7333	1.33333
16	32.5333	1.10185
16	108.667	8.81481
16	59.1333	5.62037
16	39.4889	1.71296
16	40	1.74074
16	40.1556	1.71296
16	48.3778	3
16	47.7556	3
16	49.3556	3.15741
16	37.2889	1.89815
16	29.5333	1.05556
16	20.2889	0.305556
16	21.1111	0.324074
16	19.6	0.37037
20	71.9778	5.65741
20	41.5111	2.62963
20	97.8222	6.82407
20	49.2444	3.50926
20	3.82222	0.00925926
20	5.06667	0
20	6.13333	0.00925926
20	7.2	0
20	9.64444	0.0462963
20	10.8222	0.0185185
20	11.5333	0.037037
20	9.15556	0.0185185
20	7.24444	0.0185185
20	8	0.00925926
20	22.4222	0.509259
20	24.8667	0.546296
20	45.8444	3.14815
20	28.4222	1.65741
20	7.62222	0.0185185
20	7.06667	0
20	6.86667	0
20	16.3556	0.148148
20	14.9111	0.0648148
20	17.7778	0.175926
20	17.9556	0.166667
20	19.6444	0.314815
20	22.4222	0.416667
20	22.7556	0.361111
20	24.8222	0.490741
20	38.1333	1.9537
20	36.3333	1.51852
20	62.5333	5.03704
20	31.3556	2.49074
20	8.42222	0.0185185
20	7.11111	0.037037
20	34.8667	1.61111
20	32.6222	1.72222
20	18.1111	0.305556
20	16.8889	0.240741
20	26.7556	0.694444
20	26.1333	0.75
20	24.6889	0.657407
20	24.1556	0.546296
20	23.2444	0.638889
20	80.9778	6.78704
20	57.5556	4.42593
20	16.7111	0.222222
20	17.6889	0.305556
20	13.7556	0.148148
20	12.8222	0.148148
20	32.4222	1.38889
20	29.9778	1.16667
20	31.9556	1.18519
20	30.4222	1.11111
20	17.6667	0.351852
20	20.9111	0.287037
20	24.6667	0.583333
20	27.8889	0.564815
20	17.8222	0.185185
20	17.5778	0.231481
20	18.6222	0.212963
20	18.8	0.185185
20	17.8222	0.222222
20	19.3333	0.231481
20	22.5778	0.444444
20	23.3778	0.583333
20	24.0889	0.555556
20	25.3111	0.712963
20	25.1333	0.62037
20	25.0444	0.518519
20	24.8222	0.490741
20	25.1778	0.611111
20	26.3556	0.731481
20	84.2444	8.2037
20	38.1111	3.22222
20	50.6889	3.64815
20	53.2	3.89815
20	24.3778	0.509259
20	22.8889	1.15741
20	35.4444	1.63889
20	18.9333	0.25
20	21.8889	0.416667
20	39.2	1.75926
20	41.8222	2.25926
20	32.0444	1.56481
20	37.8444	2.26852
20	19.4889	0.694444
20	24.2889	0.916667
20	29	1.35185
20	27	0.888889
20	26.8667	1.00926
20	37.3333	1.91667
20	37.0222	1.9537
20	35.5556	1.85185
20	23	0.805556
20	23.5111	0.888889
20	22.5111	0.824074
20	36.0667	1.84259
20	34.3778	1.63889
20	34.1556	1.89815
20	58.5556	4.69444
20	43.8222	2.96296
20	60.9333	5.11111
20	89.7333	7.7037
20	35.9556	3.23148
20	21.1111	0.75
20	28.0889	1.2963
20	21.9333	0.796296
20	16.7556	0.722222
20	31.5556	1.61111
20	16.0222	0.361111
20	20.7778	0.740741
20	39.0444	2.33333
20	47.4	3.5
20	23.0222	0.416667
20	21.1556	0.611111
20	22.5556	0.87963
20	43.5333	2.47222
20	38.6667	1.92593
20	33.5556	1.74074
20	40.9333	1.80556
20	35.2667	1.55556
20	41.2444	2
20	21.9333	0.972222
20	19.0222	0.722222
20	13.7333	0.685185
20	26.1556	0.592593
20	25.9333	0.925926
20	25.8667	0.62037
20	36.0889	1.33333
20	35.1556	1.25
20	36.4667	1.71296
20	39.8444	1.89815
20	41.4	2.12963
20	47.7333	2.91667
20	43.4222	2.42593
20	26.6222	0.861111
20	19.4	0.509259
20	17.4	0.472222
20	31.4444	1.19444
20	26.3556	0.824074
20	24.8	0.777778
20	45.6889	2.19444
20	38.2	1.57407
20	34.2	1.37037
20	51.8444	3
20	42.6	1.7963
20	34.5556	1.43519
20	52.5556	3.62963
20	41.8667	2.25926
20	50.3111	3.19444
20	149.689	8.37037
20	69.0222	4.19444
20	44.8	2.05556
20	35.5556	1.41667
20	36.7556	1.59259
20	37.7333	1.76852
20	35.7556	1.41667
20	42.4	1.91667
20	38.3111	1.35185
20	25.5111	0.824074
20	34.2222	1.14815
20	41.9111	1.97222
20	33.1778	1.22222
20	29	1.05556
20	65.9333	5.03704
20	58.7556	3.92593
20	48.8889	2.66667
20	50.0889	3.11111
20	39.9333	1.62963
20	33.8667	1.38889
20	17.8222	1.13889
20	7.24444	0.490741
20	22.9778	0.555556
20	26.5778	0.601852
20	10.0667	0.0648148
20	11.2889	0.0833333
20	30.4667	1.34259
20	27.6222	1.12963
20	30.6667	1.23148
20	23.7111	0.574074
20	20.7778	0.398148
20	19.1333	0.324074
20	20.9556	0.314815
20	87.8222	7.98148
20	47.9111	3.98148
20	15.6222	0.148148
20	15.8444	0.12037
20	16.3111	0.166667
20	45.3556	2.47222
20	45.4	2.46296
20	48.4889	3.01852
20	13.6889	0.185185
20	12.3778	0.12963
20	29.4	0.851852
20	29.4889	0.842593
20	35.4667	1.31481
20	37.8222	1.38889
20	26.9333	0.518519
20	25.6	0.722222
20	46.1333	2.77778
20	45.6222	2.73148
20	45.0667	2.92593
20	55.2222	3.51852
20	46.0889	2.43519
20	67.8444	5.2037
20	56.7556	4
20	50.3556	3.03704
20	43.4667	2.22222
20	130.267	9.87963
20	79.6889	7.37037
20	39.6444	1.53704
20	42.5778	1.96296
20	40.2	1.59259
20	56.9778	4.12037
20	56.4444	4.12963
20	58.8667	4.16667
20	48.1111	2.44444
20	37.1111	1.35185
20	28.0444	0.787037
20	29.6667	0.824074
20	27.9333	0.685185
15	63.8667	4.92593
15	34.5111	2.16667
15	82.6	6
15	29.2222	1.83333
15	3.62222	0.00925926
15	5.17778	0
15	6	0.037037
15	8.17778	0.0185185
15	9.95556	0.0555556
15	11.2222	0.037037
15	12.0889	0.037037
15	9.35556	0.0277778
15	8.08889	0.0555556
15	8.2	0
15	23.4444	0.666667
15	25.4667	0.564815
15	38.1556	2.63889
15	24.5778	1.46296
15	7.42222	0.00925926
15	6.82222	0
15	7.35556	0.00925926
15	15.4222	0.203704
15	16	0.166667
15	18.7556	0.222222
15	17.8222	0.240741
15	20.6667	0.287037
15	22.4667	0.407407
15	24.3333	0.583333
15	24.9111	0.398148
15	38.0222	1.88889
15	36.6667	1.55556
15	64.4444	5.5
15	33.7333	2.66667
15	8.55556	0.0462963
15	8.71111	0.0185185
15	36.5333	1.68519
15	34.9778	1.65741
15	19.2889	0.277778
15	18.3778	0.231481
15	29.0444	0.759259
15	26.2222	0.712963
15	25.4667	0.75
15	25.3778	0.675926
15	23.6444	0.601852
15	81.8222	6.94444
15	57.7333	4.44444
15	16.8667	0.148148
15	17.0667	0.12963
15	14.6667	0.166667
15	14.4667	0.12963
15	33.6	1.30556
15	32.9556	1.47222
15	33.6444	1.28704
15	32.9556	1.49074
15	18.6667	0.398148
15	19.7556	0.425926
15	22.3556	0.805556
15	25.5111	0.907407
15	16.8444	0.240741
15	16.4222	0.259259
15	17.8667	0.37037
15	19.1778	0.296296
15	18.6	0.324074
15	18.6222	0.314815
15	22.9778	0.537037
15	23.1778	0.648148
15	23.9778	0.555556
15	25.4	0.666667
15	24.9556	0.574074
15	27.1556	0.768519
15	24.0667	0.694444
15	23.8222	0.657407
15	25.1778	0.787037
15	80.1333	7.47222
15	30.1333	2.77778
15	49.1778	3.65741
15	52.7778	3.91667
15	23.9111	0.592593
15	19.8444	0.990741
15	34.4889	1.72222
15	18.0667	0.398148
15	20.8444	0.425926
15	37.8	2.14815
15	41.8444	2.43519
15	37.4	1.58333
15	43.8444	2.2037
15	23.2444	0.722222
15	28.9111	0.925926
15	31.0667	1.03704
15	30.0667	1.08333
15	31.2444	1.13889
15	39.9778	1.75926
15	38.8	1.83333
15	40.4667	2
15	25.4	0.805556
15	24.9778	0.731481
15	27.2667	0.814815
15	38.0222	1.89815
15	38.5111	1.91667
15	39.6444	1.94444
15	55.7333	3.74074
15	46.9111	3.12963
15	54.8667	3.65741
15	94.3778	7.87037
15	52.6889	4.61111
15	25.2889	0.916667
15	30.8889	1.25
15	23.3111	0.712963
15	23.6444	1.34259
15	33.6444	1.37963
15	19.9333	0.564815
15	24.8889	0.703704
15	44.8222	2.56481
15	50.6667	3.02778
15	22.1333	0.842593
15	16.8	1.08333
15	11.0889	0.944444
15	49.8667	4.12963
15	29.8889	1.92593
15	19.2889	1.60185
15	35.8222	2.01852
15	27.0444	1.66667
15	37.0222	2.09259
15	10.1778	0.842593
15	9.4	0.796296
15	4.86667	0.435185
15	26.9333	1.0463
15	16.6444	0.842593
15	19.1333	0.592593
15	28.1556	1.78704
15	29.5556	1.37037
15	35.7556	2.03704
15	31.3556	1.73148
15	33.3556	2.16667
15	43.8889	3.07407
15	26.6667	2.00926
15	30.3556	1.78704
15	13.7778	0.555556
15	8.31111	0.638889
15	34.8444	1.81481
15	20.6222	0.981481
15	13.7556	1
15	45.1778	3.07407
15	41.3333	2.43519
15	39.4	2.76852
15	47.0222	3.86111
15	44.9778	2.82407
15	37.9111	2.37963
15	50.5556	3.47222
15	46.5333	2.93519
15	53.5778	3.89815
15	147.867	8.2037
15	80.9778	5.55556
15	39.9778	2.11111
15	37.8889	1.84259
15	42.8444	2.2963
15	40.2	2.2037
15	37.6667	1.87037
15	40.2444	2.26852
15	36.1111	1.48148
15	28.1111	1.16667
15	37.1556	1.76852
15	39.9556	1.87963
15	36.0222	1.58333
15	36.5556	2.0463
15	65.7111	6.26852
15	60.8667	5.05556
15	54.6	4.25926
15	48.6222	3.85185
15	41.5778	2.4537
15	40.0667	2.5463
15	19.4444	0.907407
15	8.35556	0.527778
15	21.4444	0.490741
15	25.4889	0.537037
15	10.0444	0.0277778
15	10.1556	0.0277778
15	26.5333	0.546296
15	23.8	0.601852
15	25.3556	0.564815
15	21.8444	0.425926
15	19.8889	0.268519
15	16.8222	0.268519
15	18.9111	0.240741
15	88.4222	7.74074
15	48.8222	3.72222
15	13.5778	0.111111
15	14.5778	0.12963
15	15.7778	0.194444
15	40.9556	2.61111
15	44.6444	2.58333
15	46.3111	3.03704
15	14.6444	0.481481
15	11.5333	0.222222
15	27.3111	0.574074
15	27.3778	0.62963
15	35.0444	1.09259
15	34.2444	1.00926
15	23.4667	0.583333
15	27.0667	0.657407
15	43.4444	2.07407
15	45.3333	2.51852
15	40.8444	1.83333
15	51.8444	3.12963
15	44.6444	2.15741
15	63.0667	4.68519
15	53.1333	3.21296
15	46.7778	2.63889
15	42.5556	2.05556
15	134.178	9.15741
15	81.0444	6.64815
15	41.2889	1.83333
15	44.5556	2.2037
15	41.3778	1.75
15	57.1778	3.9537
15	56.6	3.87037
15	56.9111	3.94444
15	45.6222	2.4537
15	35.5333	1.30556
15	28.1111	0.685185
15	27.3556	0.583333
15	26.3333	0.564815
10	73.4222	4.94444
10	45.8	2.0463
10	88.3111	6.10185
10	22.6667	1.14815
10	6.57778	0.0185185
10	7.06667	0.00925926
10	8.93333	0.0740741
10	9.73333	0.037037
10	13.1778	0.0833333
10	13.5556	0.101852
10	13.5556	0.0648148
10	10.0222	0.0277778
10	8.6	0.00925926
10	10.2667	0.0185185
10	30.8889	0.935185
10	29.9556	0.925926
10	49.5556	2.52778
10	31.4667	1.47222
10	9.51111	0.0277778
10	9.95556	0.00925926
10	8.77778	0.0277778
10	20	0.240741
10	20.6889	0.277778
10	21.9556	0.268519
10	22.4889	0.453704
10	23.1556	0.37963
10	26.6	0.509259
10	27.5556	0.787037
10	27.6444	0.592593
10	38.1778	1.65741
10	36.3333	1.5463
10	61.7111	4.77778
10	31.9111	2.19444
10	7.95556	0.037037
10	8.35556	0.0185185
10	35.5778	1.62963
10	34.3111	1.71296
10	18.4	0.222222
10	18.6889	0.277778
10	25.1111	0.527778
10	25.7111	0.611111
10	25.3111	0.851852
10	24.2667	0.555556
10	22.7778	0.537037
10	81.0667	6.61111
10	56.1111	3.88889
10	17.1111	0.222222
10	18.9333	0.231481
10	14.9111	0.138889
10	13.5556	0.0833333
10	33.8889	1.46296
10	31.4667	1.25926
10	33.4889	1.28704
10	31.2444	1.14815
10	16.3111	0.268519
10	19.1111	0.462963
10	19.2222	0.509259
10	23.0667	0.638889
10	13.6	0.12037
10	14.2222	0.194444
10	15.7333	0.148148
10	15.4444	0.166667
10	16.4667	0.222222
10	16.7556	0.148148
10	19.1111	0.351852
10	20.3778	0.333333
10	21	0.342593
10	22.6889	0.416667
10	20.6667	0.435185
10	21.5333	0.425926
10	21.1333	0.490741
10	19.9111	0.444444
10	21.7778	0.453704
10	70.0667	7.10185
10	27.2667	2.75
10	41.8222	2.96296
10	43.8889	3.19444
10	18.8444	0.518519
10	16.1111	0.972222
10	29.4667	1.15741
10	14.7111	0.268519
10	16.7778	0.268519
10	32.3333	1.56481
10	34.4222	1.96296
10	32.2667	1.69444
10	37.7111	2.58333
10	23.9778	0.75
10	32.2	1.47222
10	31.0889	1.42593
10	29.3333	1.05556
10	29.6444	1.09259
10	38.7556	2.12037
10	37.7556	2.09259
10	37.6444	2.02778
10	28.6	0.981481
10	27.4444	1.07407
10	28.8444	0.925926
10	39.2222	2.33333
10	39.5333	2.18519
10	41.2667	2.01852
10	38.4222	2.41667
10	47.3333	3.31481
10	36.5333	1.88889
10	78.3333	7.82407
10	30.4444	3.18519
10	20.9556	0.787037
10	28.7556	1.32407
10	21.1778	0.648148
10	16.7333	0.925926
10	31.9333	1.69444
10	17.3111	0.388889
10	22.1333	0.759259
10	40.6889	2.69444
10	46.7111	3.59259
10	15.5333	0.425926
10	19.7333	0.768519
10	15.5333	0.675926
10	40.1111	3.36111
10	34.2444	2.21296
10	27.1333	1.7963
10	36.2222	2.25
10	29.5778	1.40741
10	37.8889	2.37037
10	18.6667	0.990741
10	15.0444	0.787037
10	9.82222	0.5
10	24.9778	0.787037
10	22.5778	1.07407
10	21.5778	0.592593
10	31.3556	1.83333
10	29.8222	1.5463
10	33.6667	1.85185
10	34.0889	2.02778
10	39.5333	2.4537
10	46.1333	3.35185
10	37.3556	2.65741
10	24.3556	1.51852
10	17.4667	0.638889
10	12.7778	0.555556
10	30.4889	2
10	22.0667	0.944444
10	19	0.962963
10	32.9111	1.37037
10	34.3556	1.63889
10	31.9111	1.41667
10	38	2
10	34.8	1.67593
10	30.7556	1.41667
10	48.5778	3.30556
10	41.4222	2.35185
10	48.7778	3.23148
10	138.222	9.08333
10	73.1333	4.92593
10	35.4	1.58333
10	34.6667	1.48148
10	36.3111	1.62963
10	34.2444	1.36111
10	35.7778	1.35185
10	38.3111	1.84259
10	36.0889	1.60185
10	25.1333	0.805556
10	36.2889	1.58333
10	37.7778	1.80556
10	33.2667	1.22222
10	29.5111	1.23148
10	52.7333	4.34259
10	52.8889	3.58333
10	45.6	2.73148
10	39.6889	2.10185
10	35.8222	1.65741
10	32.2444	1.42593
10	25.8222	1.15741
10	17.4	0.962963
10	19.0222	0.574074
10	20.9778	0.425926
10	10.8444	0.0925926
10	9.46667	0.0648148
10	21.3111	0.546296
10	22.3778	0.62037
10	20.6667	0.574074
10	12.7778	0.194444
10	16.2444	0.138889
10	9.62222	0.111111
10	14.8222	0.203704
10	83.9333	7.02778
10	62.6222	4.83333
10	10.6444	0.0833333
10	10.4222	0.0833333
10	11.1778	0.0833333
10	36.4	1.5
10	36.1778	1.75
10	36.1333	1.7037
10	8.77778	0.111111
10	7.48889	0.0740741
10	25.2889	0.731481
10	25.4222	1
10	31.4444	1.33333
10	32.6889	1.73148
10	23.7333	0.648148
10	26.2889	0.787037
10	45.7778	3.36111
10	46.2222	3.81481
10	44.0889	3.65741
10	47.3111	3.62037
10	42.7556	3
10	59.7778	5.48148
10	47.5333	3.59259
10	43.9333	3.28704
10	42.9333	2.91667
10	133.711	9.73148
10	95.4889	7.02778
10	47.8	2.96296
10	45.9333	3.12037
10	48.4889	3.5463
10	55.0222	4.23148
10	56.0667	4.42593
10	56.6444	4.60185
10	45.1778	2.96296
10	34.6222	1.59259
10	26.3333	0.768519
10	27.5778	0.796296
10	25.1333	0.583333

## Sheet: Fig. 4 C,F,G,H,K,L,M,N,O
Fig4C							Fig4F								Fig4G							Fig4H							Fig4K										Fig4L										Fig4M
Light Off	Light On	Duty Cycle On	Duty Cycle Off				VSS 10%	VSS 20%	VSS 40%	VSS 80%	CB LFP				VSS 10%	VSS 20%	VSS 40%	VSS 80%				CB Frequency	Populational Coding Frequency						Baseline	8 hz	12 hz	16 hz	20 hz	15 hz	10 hz				Baseline	8 hz	12 hz	16 hz	20 hz	15 hz	10 hz				CB Frequency
72.6745	192.373	521.277	81.811				-6.74	-6.74	-6.74	0	0				16.2682	19.3523	20.929	55.2441				8	8						94.0576	2770.34	2815.42	2482.72	1762.51	2452.31	2207.93				185.402	2333.69	3564.28	2631.55	2584.63	2198.53	2093.43				8
102.88	30.1119	127.571	46.2285				0.02	0.02	0.02	-0.01	0				42.3724	26.1932	56.1336	49.7231				12	12						233.663	4276.11	10910.1	2297.76	9108.77	7905.07	3536.07				55.5336	1278.24	5241.75	2922.03	7497.34	5823.51	3294.64				12
49.827	127.595	416.319	38.7597				-7.31	-0.01	-0.01	0	0				18.0871	43.808	52.1925	52.8437				16	16						207.724	8438.42	4548.19	10398.8	12463.2	20099.2	8698.25				83.353	1647.95	3665.28	3589.16	14863.7	2293.75	7695.26				16
22.4359	236.182	815.61	73.288				0	0.02	0	-0.01	0				16.5496	25.2761	38.3851	42.0994				20	20						147.14	3535.62	9757.56	5054.79	24342.1	7576.65	7835.19				11.453	422.754	2491.6	728.387	3365.19	1253.2	1560.17				20
43.8364	111.135	361.137	85.7411				-6.56	-7.47	0	-0.01	0				11.9667	36.2349	35.5156	51.62				15	15						589.766	11196.8	27894.6	27409.2	31625	38384.7	17430				62.4819	379.184	636.116	506.987	1650.35	1821.56	986.998				15
35.4428	54.7786	195.862	34.9952				0.02	0.01	-0.02	0	0				39.6019	57.1761	58.5306	87.9801				10	10						505.32	12560.2	21175.5	20339.9	20037.4	24502.3	13015.6				170.258	1061.97	2447.72	1181.82	2368.38	4074.67	1741.78				10
14.9684	109.816	350.866	44.5721				11.06	-0.04	0.01	-0.01					34.8702	33.1217	45.9939	46.9432				8	8						551.023	13334.2	19266	31151.6	27377.4	33640.3	17242.3				265.787	2251.73	2687.08	1622.66	3388.03	4132.91	4362.92				8
2.04114	70.6744	288.387	28.7912				-12.12	0.01	-0.03	0					18.2423	33.5084	44.8796	68.3395				12	12																										12
9.60829	8.55668	63.8758	6.85146				-8.79	-9.41	0	0					20.9994	29.0952	39.1156	62.6915				16	16																										16
9.70122	5.2986	23.0638	2.75564				0.04	-0.06	6	0					26.4812	20.3674	25.0592	52.901				20	20																										20
93.198	128.046	192.035	105.989				5.52	5.87	-6.62	-0.01					26.6767	43.878	56.8433	60.0482				15	15																										15
41.6425	205.274	586.288	108.897				-7.01	-0.01	-0.01	0					18.8454	27.8559	51.7946	72.0376				10	10																										10
65.3899	114.581	255.819	108.973				-0.05	-6.58	-6.6	-6.69					54.2151	52.0701	35.0752	55.7175				8	8																										8
68.9769	42.3945	55.6465	69.978				8.42	-0.01	0	0					15.8568	36.2468	41.6302	102.197				12	12																										12
17.7526	247.645	727.496	91.3455				-10.64	10.46	-0.01	-0.01					8.91388	21.2386	26.4958	83.2419				16	16																										16
37.5124	120.008	351.609	101.673				0	-6.54	-0.01	-0.01					18.395	20.3266	60.1129	72.0215				20	20																										20
12.6156	101.57	329.06	52.669				2.59	0.02	0	-6.69					12.5981	36.2283	59.2913	73.7073				15	15																										15
6.65061	113.582	383.297	50.0492				-9.45	0	-0.02	-0.01					23.4909	36.0477	52.926	83.3018				10	10																										10
8.84982	34.6059	133.342	28.3637				-0.06	-4.02	-0.01	-0.01					9.22982	20.832	38.4494	50.6052				8	8																										8
1.46724	60.8895	201.446	25.1533				6.42	0.01	-0.01	0					16.0304	45.9643	41.2733	62.7089				12	12																										12
68.3438	180.844	570.827	50.6359				9.4	-6.79	-0.02	-0.01					19.1595	27.7654	64.3043	101.922				16	16																										16
81.9841	116.957	286.619	110.689				-10.24	0	0	0					11.1065	21.5921	40.947	52.5707				20	20																										20
33.5493	141.851	313.689	113.055				0	5.87	-0.02	0					20.188	15.9939	43.9043	48.3961				15	15																										15
12.5442	226.779	858.31	49.2104				-6.53	-6.79	-0.01	-6.74					17.8224	16.7711	34.8575	52.6512				10	10																										10
19.2269	147.77	577.469	66.1649				0	-0.01	0	-0.01					46.5934	29.9578	25.4029	66.4743				8	8																										8
15.5875	87.1442	209.778	79.2523				10.42	-9.07	-0.01	-0.01					19.2418	36.6582	43.0091	46.6096				12	12																										12
4.50371	86.9851	228.112	51.3032				-0.02	-0.02	-0.02	-0.01					12.6634	16.3391	47.1964	66.66				16	16																										16
0.480175	32.2445	139.624	12.6324				0.02	10.18	-0.01	0					37.1429	32.7696	43.3447	67.8856				20	20																										20
3.56654	8.62352	41.901	4.65565				-6.95	-0.01	-0.04	-0.01					22.0426	26.1739	41.8904	78.4631				15	15																										15
87.0131	71.0623	94.108	63.2695				-3.31	5.58	0	0					20.7844	75.5161	102.418	67.4612				10	10																										10
43.4005	98.4586	305.465	45.9302				0.04	10.34	6.7	0					29.7589	41.3677	47.4507	53.8599				8	8																										8
36.6629	67.8038	275.777	16.9456				8.35	-0.04	0	0.01					8.85794	23.537	42.2562	53.7348				12	12																										12
5.52858	202.639	814.557	7.51117				-6.79	-0.01	-0.01	0					30.3695	51.2146	77.7683	68.4065				16	16																										16
8.43034	136.823	613.884	25.9559				0	-6.86	0	0					30.2863	26.2491	33.8902	70.4762				20	20																										20
4.77996	155.567	491.68	62.694				6.94	-0.02	-0.02	0					27.2125	31.1769	38.0782	45.1858				15	15																										15
11.7197	92.6342	403.937	33.8457				-0.02	-0.02	-6.62	0					34.0582	51.9401	41.0208	75.8789				10	10																										10
11.8555	17.6208	107.383	11.1607				-9.11	0	0	0					35.3353	67.0604	120.697	101.379																															8
83.5042	133.561	337.865	65.3175				0.02	-0.02	-0.01	0					26.4904	41.7233	41.616	74.9772																															12
5.83997	372.257	1380.9	59.5162				0.01	-6.51	0	0					10.8289	22.9435	30.6714	41.1228																															16
34.0764	147.466	711.711	73.6701				5.83	-0.02	0.02	-0.01					17.8308	24.7952	38.5082	61.2292																															20
30.5307	86.6603	253.365	52.7278				10.53	4.14	0.01	0					26.4175	25.7086	47.7865	60.5877																															15
25.5316	2.71737	22.3063	5.02676				-10.5	10.35	0	-0.01					14.377	28.5937	58.0273	64.1063																															10
29.0211	41.6588	103.854	21.3827				-5.61	0.01	-0.01	-0.01					9.9455	8.4983	31.2776	51.2936
6.74377	26.3665	84.8184	28.3685				-3.33	-0.02	0	0					17.8858	24.6883	42.8354	70.8199
0.185396	20.8067	89.1797	1.09343				-0.04	7.74	0.01	-0.01					49.8843	29.9363	41.3	43.2065
88.4031	17.7509	36.4809	11.4544				-6.82	-9.23	-0.01	-0.01					11.5967	26.4663	31.7205	40.1755
1.09426	169.827	665.923	19.3728				0.01	0	-6.79	0					22.2182	17.3533	44.6201	62.6961
12.3353	85.1793	348.038	41.6772				-8.75	6	0	-0.01					20.4963	32.793	35.9874	62.1013
2.31121	111.042	447.942	12.1345				-6.61	-7.46	-0.01	0					11.9924	19.1352	24.8729	43.6485
11.6688	43.8171	181.862	24.556				0	0	-0.02	0					17.2148	21.934	33.9842	66.6593
13.6517	52.3249	153.925	21.5186				5.96	-0.02	5.12	-6.69					20.4584	32.8814	40.6152	90.9411
18.4665	11.4493	63.3782	3.52096				-3.84	0.03	-7.02	0					30.8277	35.7417	38.0147	53.0887
13.738	0.350718	4.33973	0.664902				-0.02	-0.04	0.01	-0.01					20.9843	35.1889	62.3239	60.3309
1.05779	37.5155	122.733	9.03662				4.58	5.11	-0.01	0					26.7403	31.0088	57.3708	82.2245
4.71527	14.2097	60.6207	5.01699				-6.68	-10.14	0.01	0					16.5465	20.8108	38.3769	75.4287
0.172429	23.962	102.571	1.08802				-0.04	-6.9	-0.01	0					16.8094	22.9233	28.7511	59.2878
0.318331	16.4611	61.1631	2.07026				-10.75	-0.02	-0.01	0					23.5827	46.8366	111.007	88.9347
0.404545	11.0307	51.3987	1.20891				-7.64	12.17	0	0					25.504	37.7799	40.2274	61.9448
							-3.48	0	0.01	0					28.8914	26.6591	45.4722	64.0121
							-0.08	4.09	0.02	-6.77					13.0798	24.6713	29.84	54.2881
							2.9	-6.6	-0.01	-0.01					11.3306	23.1807	28.1904	42.8247
							-0.03	-0.01	0	0					22.1233	40.9793	43.708	41.6681
							9.13	0.01	-0.02	0					10.7624	11.919	24.2227	62.1533
							0	0.01	0	-6.69					38.0045	37.8749	53.6631	40.8947
							12.38	0	0	0					25.834	30.401	28.4071	80.7962
							-6.86	-3.77	0.01	0					27.301	20.9246	43.4999	39.1249
							-0.04	0	-6.74	0					24.494	32.0532	58.9524	66.1927
							3.44	-6.53	-0.01	-0.01					31.6525	37.4392	50.1178	76.7171
							8.87	0	0.02	-0.01					22.1006	40.1059	31.0377	78.0509
							12.1	-0.01	-6.69	-0.01					24.195	22.9527	38.8779	44.4082
							-8.8	6.02	-0.02	0					11.9414	13.0816	44.063	54.4975
							-0.01	-6.51	0	-0.01					15.4244	18.0037	65.6284	54.2819
							0.02	0	0	0					17.1615	29.9068	41.5992	41.3595
							-0.04	10.16	-6.63	0					10.1015	24.1462	55.7268	70.4088
							-7.32	-0.01	0	0					16.6935	23.5857	22.651	36.2302
							0.03	0.02	-0.01	-6.69					19.9488	29.1416	25.2413	44.9234
							-9.26	-9.08	0.01	0					20.3854	39.2416	33.1418	69.0431
							-6.62	-3.52	-0.02	-6.82					24.2845	30.8694	31.3283	63.5998
							-0.04	-0.04	-0.01	0					22.9639	43.4655	49.8888	59.362
							-10.14	4.05	-0.02	0					27.6459	92.8164	52.7396	73.3208
							-7.02	-7.16	-6.69	0					32.0605	36.7221	39.4249	80.5662
							0.02	0	0.01	0					20.6843	20.2111	31.768	54.2868
							-0.02	-0.01	0.02	-6.63					28.759	53.5156	47.8663	61.6056
							4.09	5.2	-0.01	-0.01					49.1676	23.7563	23.1398	50.5211
							-6.49	-6.53	0.02	-0.01					13.5565	16.5748	22.3499	68.2747
							-4.18	0.01	0	-6.78					22.317	30.9893	64.4353	78.5323
							0.01	9.39	-0.01	0					40.6527	24.8477	25.0079	33.3523
							10.43	-0.02	-0.02	0					19.3825	24.7315	39.9155	68.8578
							-2.24	12.74	-0.03	0					13.2567	17.6967	36.0869	53.8463
							0.04	-0.01	4.02	-0.01					13.1527	20.9181	20.4235	51.579
							-6.45	0	-6.76	0					11.1158	23.1588	28.3384	61.2244
							0.04	0.01	0	-0.01					7.81715	20.8523	28.0335	76.3068
							5.27	0	6.99	-0.01					21.0628	22.8955	32.6339	57.0274
							-0.02	0.02	-6.63	0					39.0831	41.7852	40.1837	63.2632
							-1.94	-0.01	0	0					16.744	24.6488	33.2579	53.4715
							0.06	-6.59	5.2	0					64.0305	24.906	36.8177	56.523
							7.06	-0.04	0	-0.01					20.8159	25.6145	64.6094	50.2786
							0	-0.04	-0.01	-6.62					17.1612	28.012	27.3824	44.6241
							-4.05	2.69	-6.6	0					39.2808	30.9499	38.317	47.0171
							-0.01	-6.74	0.02	0					16.2381	19.1401	40.7157	74.1991
							2.9	0.02	-0.01	0
							12.44	0.03	-0.02	0
							-6.51	-6.69	-6.69	0
							-2.35	0.02	0	0
							-0.04	0.04	-9	-0.01
							6.7	6.45	0.03	0
							10.03	-0.06	5.27	-0.01
							-7.89	-0.02	-0.01	0
							-0.01	5.23	0	-0.01
							0.04	-0.01	-0.01	0
							13.97	-6.74	-0.02	-0.01
							-9.17	-3.85	0
							-3.59	-0.01	6.88
							-0.05	7.33	-6.74
							4.02	-0.03	0.01
							-7.3	-6.89	-9.27
							-0.01	0.01	-6.51
							2.61	7.52	-0.02
							6.41	0	-6.47
							12.67	-0.02	0
							13.98	-0.02	-0.01
							0	0.01	-0.01
							-6.46	0.03	0
							0.01	5.12	0
							0	-7.01	0.01
							-0.02	-3.29	0
							-3.56	0.02	0
							0	0.01	2.86
							-7.53	0
							0.02	2.81
							2.1	-0.01
							5.99	-0.04
							8.29	9.44
							-10.33	-0.03
							0	-0.01
							5.29	0.01
							12.04	-6.84
							-6.51	0.01
							-0.01	-0.01
							-7.64	-6.6
							0	0.02
							-6.58	-0.03
							0	-8.87
							13.86	-0.01
							-0.04	-6.6
							10.01	0.03
							-6.82	5.11
							0.02	0.03
							-0.02	-6.79
							-6.88	-0.02
							-3.04	0.01
							0.03	12.15
							0.08	-0.02
							0	-0.02
							-4.01	6.45
							-0.05	-8.76
							2.09	0.02
							4.09	-6.91
							8.72	0.02
							-9.51	6.16
							-6.46	-0.02
							0.02	-8.87
							6.56	-6.35
							-3.76	0.02
							-0.03	-0.01
							10.07	-0.01
							-0.03	0.02
							-6.91	5.59
							-0.01	-0.01
							0	2.8
							7.9	0
							-0.04	-9.19
							-7.31	-6.61
							-3.82	0.02
							0	7.58
							-6.56	-3.72
							0.01	0
							6.18	2.9
							10.45	5.87
							-7.92
							0
							-7
							-3.22
							-0.03
							-6.6
							0.01
							5.14
							-9.39
							-0.02
							6.36
							-8.79
							-0.04
							-10.3
							-9.09
							-0.02
							9.49
							-0.07
							-6.93
							-0.02
							0.01
							8.39
							-6.89
							0.01
							-0.02
							7.8
							-6.68
							0.05
							6.16
							-0.03
							-8.83
							0.01
							-6.56
							0.04
							5.24
							-0.01
							4.21
							-0.04
							12.85
							0.02
							-9.41
							-3.82
							0
							8.86
							12.64
							-10.69
							-5.06
							-0.02
							6.69
							9.83
							-8.76
							0.02
							8.51
							-7.26
							0.02
							2.15
							6.06
							-12.5
							-9.5
							-0.05
							5.09
							9.53
							-8.87
							-6.35
							0.06
							0.03
							-6.87
							-0.01
							5.26
							0.04
							-0.01
							12.68
							-0.02
							-6.67
							0.02
							7.52
							-7.42
							-3.07
							0
							6
[truncated: 9 more columns]

## Sheet: Fig5 E, G,H
Fig 5E								Fig 5G														Fig 5H
Peak Frequency & Ampltiude								CB x ACC							CB x Motion							Cerebellar-Motion Correlation
Amplitude			Frequency
CB	Motion		CB	Motion				Baseline	Light on	Light off					Baseline	Light on	Light off					Baseline	Motion	Frequency Peak	Amplitude Peak
4.68592	9.28521e-05		26	26				47.5373	138.798	56.9563					47.8865	482.617	69.9318					0.0864716	0.195426	0.981539	0.0109496
3.02861	2.60292e-05		26	29				155.981	267.786	162.178					151.604	760.035	197.781					0.0853251	0.181847	0.970205	0.000868316
1.48854	4.65301e-05		27	25				136.362	117.254	100.342					139.182	371.386	107.088					0.121117	0.161906	0.974977	0.003032
0.873524	4.5344e-05		25	25				75.2799	135.843	101.661					76.5753	535.567	120.507					0.101188	0.251323	0.979839	0.00205446
5.04615	5.81826e-05		27	28				87.0506	174.086	106.069					85.6784	635.565	113.128					0.115402	0.268596	0.980174	0.0689219
6.32444	6.60753e-05		25	25				140.038	247.686	132.019					140.242	753.312	133.081					0.0951369	0.193354	0.97594	0.00931717
3.96624	3.60398e-05		26	27				98.0733	111.711	101.333					100.712	338.017	114.894					0.117182	0.151754	0.976502	0.0303562
1.3614	3.39728e-05		27	27				117.715	158.422	121.15					124.376	471.133	122.934					0.107593	0.175691	0.974715	0.0421253
0.0515924	6.18753e-05		27	27
1.73317	5.98942e-05		25	26
6.3404	1.30892e-05		5	6
5.22507	0.000220779		5	5
8.09209	6.01632e-05		4	5				Table Analyzed	ACC x CB Xcorr mean						Table Analyzed	Compensated_ACC x CB						Table Analyzed	Time Domain vs Frequency Domain (Baseline)
5.50078	0.0001483		5	5
8.4753	0.000107633		4	4				Friedman test							Friedman test							Friedman test
0.636524	0.00032958		5	5				P value	0.0048						P value	0.0009						P value	<0.0001
27.093	0.000374069		5	5				Exact or approximate P value?	Exact						Exact or approximate P value?	Exact						Exact or approximate P value?	Approximate
22.6037	0.000214886		5	5				P value summary	**						P value summary	***						P value summary	****
3.40564	0.000184046		4	5				Are means signif. different? (P < 0.05)	Yes						Are means signif. different? (P < 0.05)	Yes						Are means signif. different? (P < 0.05)	Yes
17.7458	0.000277396		5	5				Number of groups	3						Number of groups	3						Number of groups	4
49.3133	4.88309e-05		5	6				Friedman statistic	9.75						Friedman statistic	12.25						Friedman statistic	24
18.4126	0.000216803		5	6
6.58865	0.000184185		5	5				Data summary							Data summary							Data summary
28.6324	0.000775286		5	6				Number of treatments (columns)	3						Number of treatments (columns)	3						Number of treatments (columns)	4
71.059	0.000126073		8	5				Number of subjects (rows)	8						Number of subjects (rows)	8						Number of subjects (rows)	8
0.830063	0.000497035		4	6
11.8631	0.0010219		6	5
15.279	0.000329065		6	6
6.0664	8.89261e-06		6	6
15.3591	0.00065209		6	6
33.1417	2.90417e-05		6	5				Multiple comparison							Multiple comparison							Multiple comparison
2.80943	0.000496851		6	6				Number of families	1						Number of families	1						Number of families	1
5.25766	0.000437047		7	6				Number of comparisons per family	3						Number of comparisons per family	3						Number of comparisons per family	6
23.4643	0.000571871		7	6				Alpha	0.05						Alpha	0.05						Alpha	0.05
8.12761	6.18443e-05		4	6
18.1698	0.00112786		5	6				Dunn's multiple comparisons test	Rank sum diff.	Significant?	Summary	Adjusted P Value			Dunn's multiple comparisons test	Rank sum diff.	Significant?	Summary	Adjusted P Value			Dunn's multiple comparisons test	Rank sum diff.	Significant?	Summary	Adjusted P Value
8.36783	0.0010021		5	6				Baseline vs. Light on	-12	Yes	**	0.0081	A-B		Baseline vs. Light on	-13	Yes	**	0.0035	A-B		Baseline vs. Motion	-8	No	ns	0.728	A-C
5.49486	0.000472629		6	6				Baseline vs. Light off	-3	No	ns	>0.9999	A-C		Baseline vs. Light off	-2	No	ns	>0.9999	A-C		Baseline vs. Frequency Peak	-16	Yes	*	0.0117	A-E
16.536	2.89297e-05		7	6				Light on vs. Light off	9	No	ns	0.0733	B-C		Light on vs. Light off	11	Yes	*	0.0179	B-C		Baseline vs. Amplitude Peak	8	No	ns	0.728	A-F
14.9911	0.000274843		6	6																		Motion vs. Frequency Peak	-8	No	ns	0.728	C-E
18.5256	0.000225179		7	7				Test details	Rank sum 1	Rank sum 2	Rank sum diff.	n1	n2		Test details	Rank sum 1	Rank sum 2	Rank sum diff.	n1	n2		Motion vs. Amplitude Peak	16	Yes	*	0.0117	C-F
2.90668	0.00107732		7	7				Baseline vs. Light on	11	23	-12	8	8		Baseline vs. Light on	11	24	-13	8	8		Frequency Peak vs. Amplitude Peak	24	Yes	****	<0.0001	E-F
4.52307	0.000559744		7	7				Baseline vs. Light off	11	14	-3	8	8		Baseline vs. Light off	11	13	-2	8	8
37.3373	0.000404872		7	7				Light on vs. Light off	23	14	9	8	8		Light on vs. Light off	24	13	11	8	8		Test details	Rank sum 1	Rank sum 2	Rank sum diff.	n1	n2
12.2192	0.000108481		6	7																		Baseline vs. Motion	16	24	-8	8	8
5.27433	0.00123891		8	7																		Baseline vs. Frequency Peak	16	32	-16	8	8
22.7524	0.00057269		7	7																		Baseline vs. Amplitude Peak	16	8	8	8	8
4.44088	0.000894438		7	7																		Motion vs. Frequency Peak	24	32	-8	8	8
4.07107	5.23749e-05		6	7																		Motion vs. Amplitude Peak	24	8	16	8	8
20.3751	0.000180529		7	7																		Frequency Peak vs. Amplitude Peak	32	8	24	8	8
16.7933	0.000574893		6	6
8.63616	0.000380788		9	8
7.36581	0.000765521		7	8
22.715	0.000555371		7	8
8.87042	0.000759559		8	8
5.06527	0.000895099		7	8
14.4783	0.000648757		7	8
5.58445	0.00126343		8	8
1.51959	0.000686669		8	8
8.2683	0.00040762		7	8
6.27411	0.000609655		7	9
13.1464	0.000554362		8	8
1.91387	0.00229129		8	8
51.7514	0.000820106		8	8
11.9854	0.000394248		8	8
3.35958	0.00117101		6	8
0.951275	0.00298225		9	8
11.2359	0.00182533		9	8
6.77818	0.000750036		6	8
85.5206	0.000627831		9	8
14.5925	0.00255814		9	9
40.0909	0.000213102		9	9
6.05955	0.00272519		9	9
12.9712	0.0025304		9	9
4.34891	0.000532672		5	9
7.80369	0.00160818		9	9
11.5105	0.00107316		10	9
13.5743	0.00282465		9	9
9.66251	0.00131293		9	9
3.51095	0.000642179		8	9
21.8683	0.00280289		10	10
1.30032	0.00084608		8	10
9.38569	0.00350642		9	10
15.2669	0.00276991		10	10
19.8046	0.00106271		10	10
9.15001	9.352e-05		9	9
5.5729	0.00135459		11	10
39.3959	0.00354743		10	10
13.3657	0.00136026		9	10
5.03535	0.00179809		9	10
16.1686	0.000862201		12	10
22.4948	0.000183154		10	10
1.75928	0.00312704		10	10
50.6799	0.00281555		10	10
10.268	0.00164524		10	10
28.5598	0.000649721		10	11
3.09127	0.00204903		12	10
28.0268	0.00510031		10	10
2.2443	0.00182833		11	10
7.77971	0.000526898		11	11
1.42435	0.00128049		10	11
73.3467	4.37001e-05		11	11
8.61456	0.00446688		12	11
46.9611	0.00508734		11	11
1.70581	0.00295822		10	11
13.3897	0.000169702		11	11
1.27049	0.00414356		10	11
16.3398	0.00766257		11	11
2.26195	0.00146625		11	11
47.5762	0.00147387		11	11
10.9973	0.00234855		12	12
15.4367	0.000578018		11	12
3.25969	0.00529145		12	12
21.7968	0.00488822		12	12
7.51638	0.00399464		9	12
20.8798	0.000139476		11	12
5.56604	0.00509546		11	12
12.7072	0.00876296		12	12
11.275	0.00201736		12	12
26.8776	0.00248815		12	12
10.0577	0.0017398		12	13
18.4805	0.00151494		12	13
1.34943	0.0043204		13	13
11.5691	0.00169722		13	13
1.64046	0.00301502		12	13
12.7667	0.00296127		12	13
8.90676	0.00558671		13	13
5.36304	0.00649735		13	13
15.3702	0.00167864		12	12
19.1137	0.00405345		12	13
22.2518	0.00310171		14	13
10.6562	0.00433323		13	13
2.67786	0.00561773		13	13
7.83447	0.00346416		14	13
15.4176	0.0045132		12	13
12.2233	0.00189228		14	14
3.47115	0.0046875		13	13
11.2655	0.00874546		14	13
17.0806	0.00542327		13	13
25.2499	0.00668233		13	13
17.6001	0.00653674		14	14
2.3012	0.00476877		15	14
17.5886	0.00721349		14	14
14.5128	0.0103405		14	14
14.1369	0.00726574		14	14
28.92	0.00129298		14	14
53.1632	0.00668494		14	14
16.8354	0.0108069		14	14
14.5344	0.00478214		14	14
18.5837	0.00822315		13	14
7.28081	0.00920583		15	15
4.8948	0.00648407		16	15
28.4848	0.00701522		14	15
19.1257	0.00412743		14	15
9.61947	0.00717894		15	15
4.69307	0.0017464		16	14
39.2223	0.00589175		15	15
13.1331	0.00981001		15	15
7.97476	0.00480122		14	15
2.14317	0.0090599		17	15
13.3706	0.00669354		15	15
1.4464	0.0106557		16	15
7.37777	0.00894793		15	15
6.2442	0.00579399		15	15
12.3348	0.0097745		16	15
10.148	0.0072427		16	15
51.1509	0.00946146		15	15
5.55922	0.00997235		15	15
12.5953	0.00734629		15	15
3.14748	0.015019		14	15
6.8681	0.0148968		16	16
3.98923	0.0160186		18	16
4.75422	0.0070209		15	16
14.894	0.0143713		16	16
11.9543	0.0139873		16	16
2.60974	0.0163461		16	16
22.5525	0.0161048		17	16
9.98235	0.0116809		16	16
4.01177	0.0112596		16	16
14.3514	0.0199038		16	16
4.80082	0.0281567		17	17
0.535156	0.0173466		17	17
11.7641	0.00905649		17	17
2.79909	0.010349		17	17
6.23058	0.014299		17	17
6.26883	0.0130038		17	17
8.30441	0.0184358		17	17
12.4864	0.0101596		18	17
9.68266	0.0118213		17	17
8.29732	0.0170349		16	17
0.919413	0.0233335		15	17
7.16609	0.0181674		17	17
5.68138	0.0143488		17	17
0.626715	0.0142991		17	17
2.0058	0.0129612		17	17
11.2728	0.0133873		18	17
2.34952	0.0237155		16	17
13.4544	0.00862399		18	18
6.00457	0.0106933		18	17
23.8085	0.0154863		17	17
2.47101	0.0373455		18	18
1.79458	0.025557		18	18
2.99899	0.0157709		20	18
9.43264	0.0192595		17	18
0.88096	0.0172409		18	18
9.63451	0.0250466		19	18
10.2303	0.0219539		19	18
2.99797	0.0168511		19	18
7.47821	0.0255079		18	18
13.0007	0.0272574		18	18
10.1439	0.0453045		18	19
8.93856	0.0290985		19	19
2.36856	0.0300487		19	19
12.2756	0.0247739		17	19
2.93243	0.0202047		19	19
19.0667	0.0322761		18	19
7.68537	0.0197335		19	19
4.08962	0.0177191		19	19
6.42456	0.0347426		20	19
16.8339	0.0328264		19	19
15.8691	0.0403802		19	20
6.51412	0.0266836		19	20
7.07465	0.0249608		20	20
66.1864	0.0276169		20	20
3.72257	0.0183479		18	20
5.24342	0.0278219		19	19
3.04421	0.0309737		19	19
11.8373	0.0250755		20	20
1.34647	0.0249425		20	20
9.09475	0.0306419		19	19
21.1024	0.0499742		20	20
3.7744	0.0415803		18	20
5.18711	0.035421		20	20
16.9469	0.0434271		20	20
2.40797	0.0299895		19	20
3.80381	0.0364154		20	20
27.4373	0.0433103		21	20
11.8037	0.0335186		20	20
5.00237	0.0485931		19	20
14.9939	0.043319		20	20
5.28183	0.0541896		21	21
3.59317	0.0569357		21	21
6.59597	0.0438763		21	21
12.9764	0.0488722		21	21
11.1801	0.0381143		21	21
11.6338	0.0412135		21	21
19.5735	0.0572349		21	21
21.1646	0.0412604		21	21
5.24103	0.0445621		21	21
22.7023	0.0655481		21	21
5.89541	0.0614976		22	22
4.92527	0.0445581		22	22
2.9236	0.0439234		22	22
20.6297	0.0408618		22	22
14.8476	0.0457692		22	22
13.0005	0.048244		21	22
23.5484	0.0424373		22	22
13.3789	0.0463344		22	22
8.51268	0.0447864		23	22
7.17736	0.0568786		22	22
8.10512	0.0595134		22	22
2.25848	0.0525447		22	22
6.82829	0.0520171		20	22
8.61972	0.0504655		23	22
6.11961	0.0533334		22	22
13.3109	0.0568273		22	22
2.8838	0.0598865		22	22
32.366	0.0380913		22	22
3.51944	0.0517647		21	22
13.1561	0.0642207		23	22
7.02546	0.0639469		23	23
2.66944	0.047457		23	23
6.72909	0.0534178		23	23
28.6739	0.0605322		23	23
18.9345	0.063589		23	23
5.54323	0.0648534		24	23
5.38835	0.0734709		22	23
6.84878	0.0473537		22	23
4.85826	0.0607795		22	23
0.987351	0.0620849		23	23
13.5219	0.0614268		25	24
3.13934	0.047444		24	24
1.04117	0.0433737		25	24
8.28511	0.0489985		23	24
13.7776	0.0519466		25	24
10.3305	0.0553865		25	24
3.24782	0.0575777		23	24
3.62898	0.039491		25	24
10.2982	0.0514181		24	24
50.2254	0.0480682		24	24
24.0087	0.0343961		24	24
8.36348	0.0362676		24	24
20.0067	0.0347815		24	24
10.3697	0.0411113		22	24
23.1449	0.0352158		25	24
13.8263	0.0316115		24	24
1.39423	0.0384437		24	24
30.4561	0.0292804		24	24
9.1444	0.0270616		25	24
5.76722	0.0505533		24	24
15.3478	8.02988e-05		25	27
20.4547	8.44081e-05		24	26
8.09295	6.75264e-05		27	27
5.16583	0.00013108		27	23
11.7187	0.000109457		26	27
8.44499	0.000171712		25	27
7.10103	7.89042e-05		25	23
14.812	0.000113929		26	27
8.51876	7.66205e-05		24	27
4.0592	0.000100805		26	26
33.7146	3.8953e-05		4	5
22.3584	0.000155056		5	5
37.0535	8.92656e-05		5	4
27.7879	9.10455e-05		4	5
9.27867	0.000184374		5	5
68.9108	0.000137409		5	6
152.665	6.82459e-05		4	5
34.0404	5.81792e-05		4	5
2.67252	0.000473869		3	5
52.5165	0.000140725		4	5
47.64	0.000433621		6	5
6.00318	0.00018222		5	6
167.262	0.000828514		5	6
51.0971	8.62268e-05		4	6
17.0262	0.000453795		6	6
44.5179	6.89759e-05		7	6
42.4027	0.000174392		4	5
26.8234	7.02335e-05		4	4
13.5556	0.000370601		5	6
38.8127	0.000254972		5	6
134.505	0.000144852		6	5
190.738	0.000581148		6	6
19.7899	0.000817072		5	6
34.8464	0.000427214		7	6
17.2769	0.000607955		5	7
71.3744	0.000264196		5	6
123.238	0.000513874		5	6
42.0651	9.78418e-05		5	7
8.63565	0.0015348		5	6
59.2833	0.000508106		4	6
23.9339	0.000156083		5	7
59.7036	0.0006901		6	7
38.5899	0.00136259		6	7
16.0274	0.00124799		8	7
24.7023	0.000502139		7	7
67.6286	0.000257416		5	7
69.1052	0.000756638		6	7
21.6852	0.000132133		7	6
10.4487	0.000993673		8	7
31.5554	0.00114497		8	7
39.9793	0.000737955		8	8
35.197	0.00126185		10	8
33.9283	0.00142486		10	8
25.002	0.00119662		9	8
84.6443	0.000853745		8	8
30.9992	0.000201195		8	8
16.0021	0.00108704		8	7
33.4402	0.000325295		9	8
12.3835	0.000738726		9	8
129.642	0.00143065		6	7
10.9215	0.00135277		9	8
50.0284	0.00440979		5	8
54.4745	0.00172932		8	8
33.0298	0.00167837		7	8
12.214	0.00124532		7	8
28.6398	0.000551204		7	8
11.8843	0.000460629		10	8
95.6299	0.000486819		9	8
24.8832	0.00163211		9	8
8.26467	0.00440381		9	8
17.0576	0.0020553		12	9
38.8566	0.00172465		8	9
105.198	0.00185729		8	9
5.47259	0.00494643		12	9
39.395	0.00111104		10	9
93.5347	0.00425862		5	9
0.930947	0.00146074		9	9
6.30402	0.000981853		12	9
38.2707	0.00292971		9	9
63.9734	0.00142872		6	9
15.0984	0.00118835		10	10
66.0063	0.00181541		10	10
3.18013	0.000678713		11	10
30.302	0.00589852		10	10
180.78	0.000327635		8	10
29.0599	0.00150476		10	10
50.1778	0.000213126		10	10
13.7811	0.00159204		11	10
3.03156	0.00396781		11	10
7.75944	0.00185761		8	10
37.3516	0.000203292		10	11
26.9696	0.00168312		8	10
24.0817	0.000194878		11	11
4.94951	0.0059918		11	10
25.3193	0.00145439		11	10
17.7252	0.00247406		11	10
56.3453	0.00187534		9	10
16.3417	0.00162978		9	10
24.1434	0.00343006		10	10
44.3093	0.00161732		8	10
55.0485	0.00100429		10	11
25.9357	0.00270488		9	11
2.00417	0.00185437		12	11
12.2187	0.010736		10	11
7.01555	0.00108532		12	11
16.1369	0.00501366		12	11
47.5527	0.00557908		11	11
17.9211	0.00109742		11	11
29.2116	0.00620235		11	11
16.8869	0.00400652		10	11
25.4579	0.00221523		12	12
18.8439	0.00373433		12	12
33.5673	0.00251085		12	12
12.2109	0.00536464		13	12
9.20344	0.00198557		12	12
13.3951	0.00578472		12	12
25.2192	0.00288558		11	12
3.29313	0.00163432		11	12
7.52278	0.0058544		13	12
49.5246	0.004641		12	12
9.60295	0.00396982		11	13
22.7929	0.00315593		12	12
20.3882	0.00255747		12	12
38.9172	0.00653129		13	12
24.6189	0.00194498		12	12
13.7604	0.0081073		11	12
47.1718	0.00498146		10	12
9.6181	0.00195245		10	13
8.77091	0.00697546		10	12
26.192	0.00372742		12	12
20.7826	0.00523129		13	13
21.7051	0.00436631		14	13
13.352	0.00783325		12	13
40.5157	0.0115758		14	13
31.7935	0.00196816		13	13
26.7881	0.0119805		14	13
85.2027	0.0083407		11	13
2.39138	0.0017745		12	13
1.20928	0.0106801		16	13
25.2533	0.00641342		13	13
33.3922	0.00603983		14	14
69.7833	0.00742671		14	14
1.81357	0.0162841		13	14
16.3653	0.0100595		15	14
10.3936	0.00333922		14	14
6.50656	0.0136497		15	14
46.7249	0.00545064		14	14
35.3471	0.00552796		14	14
6.81321	0.0088725		14	14
29.7147	0.00825317		14	14
55.3815	0.00625235		15	15
23.215	0.00452338		15	15
4.11099	0.0170993		14	15
26.9441	0.0075158		15	15
10.2538	0.00485204		16	15
11.9409	0.010119		15	15
78.7106	0.00403545		15	14
31.3363	0.0054784		15	15
28.4874	0.00294211		15	15
6.63052	0.00902512		17	15
28.0846	0.00940199		15	15
30.6607	0.00345601		15	15
4.01181	0.0177194		17	15
29.1133	0.00656436		15	15
15.3653	0.00657232		15	15
21.9818	0.0138351		15	15
26.4455	0.00480678		15	15
33.7519	0.00337687		13	15
21.6327	0.00753809		15	15
20.2728	0.00953063		14	15
20.2786	0.0125551		16	16
81.157	0.00734403		16	16
15.7254	0.020497		17	16
14.0223	0.0101515		16	16
14.3784	0.0146613		16	16
11.1986	0.00890217		15	16
43.7327	0.00545076		16	16
17.3743	0.0107434		16	16
18.8297	0.0142549		18	16
17.8174	0.0143578		16	16
21.1312	0.0114881		15	17
39.5953	0.00955538		17	17
7.73884	0.0210577		17	17
11.4557	0.00450494		16	17
30.7699	0.024487		17	17
38.2031	0.0182681		17	17
22.6458	0.0102257		17	17
20.78	0.0110098		16	17
17.7169	0.00960677		16	17
10.6733	0.0164025		16	17
39.264	0.0143413		18	17
10.9473	0.00586442		17	17
13.8595	0.0256265		17	17
6.49615	0.00439289		15	17
39.9209	0.0268066		17	17
21.6779	0.0263537		17	17
36.0085	0.00457512		17	17
23.8525	0.00955863		17	17
4.70876	0.0143075		17	17
12.3124	0.0213624		18	17
33.4025	0.0181454		18	18
5.71861	0.0122613		19	18
12.9755	0.0275817		18	18
3.67648	0.00644493		19	18
8.43645	0.0311483		17	18
7.08862	0.0261707		17	18
22.5533	0.0112303		18	18
54.2035	0.0157658		18	18
97.0507	0.0229183		18	18
1.25224	0.0309405		17	18
33.8184	0.0259796		19	19
6.37804	0.0124817		18	19
26.7649	0.036518		18	19
12.1237	0.0095722		19	19
13.2565	0.0317594		19	19
1.20867	0.0315069		18	19
42.4694	0.0133066		19	19
35.2566	0.0269716		18	19
44.9178	0.0228418		19	19
7.68776	0.0386669		19	19
23.9327	0.0250194		18	19
12.7408	0.0170332		20	19
12.0195	0.0304502		19	19
4.7829	0.0142757		20	19
4.10639	0.0266036		20	20
48.7	0.0309819		19	19
54.4244	0.0128717		19	19
40.4402	0.0170433		20	19
56.9578	0.0153761		20	19
15.8672	0.0318936		18	20
19.0289	0.0277292		20	20
33.9597	0.0259209		20	20
18.8719	0.0507076		21	20
16.7395	0.0230132		20	20
15.4068	0.0440063		20	20
49.3471	0.0432696		20	20
111.093	0.0193232		20	20
10.1745	0.0173219		20	20
9.86057	0.0394089		19	20
15.7691	0.0438825		20	20
28.6274	0.0513183		22	21
34.0677	0.0295432		20	21
10.7402	0.0502236		20	21
39.793	0.0248137		21	21
7.3867	0.050087		21	21
9.94996	0.0557121		20	21
79.572	0.0310628		21	21
63.8736	0.0198132		21	21
111.838	0.0464724		21	21
38.8368	0.0535606		21	21
15.3897	0.0216407		21	22
23.0988	0.0423742		21	22
26.961	0.0475556		22	22
45.5217	0.0333742		22	22
26.4514	0.0530027		22	22
7.23812	0.0350974		22	21
37.1191	0.0329718		21	22
69.843	0.0268401		21	21
10.7311	0.0423307		23	22
10.8163	0.0486818		21	21
115.864	0.0213878		22	22
59.8234	0.0511044		22	22
9.74737	0.0601189		21	22
125.231	0.0419527		22	22
23.873	0.0671363		23	22
21.6258	0.0571284		22	22
4.54568	0.0321264		22	22
10.9748	0.0196749		22	22
39.4844	0.0512783		22	22
8.6218	0.0408683		24	22
16.2263	0.0372447		23	23
26.8789	0.05694		23	23
27.6092	0.0646033		22	23
199.106	0.0445973		23	23
71.8387	0.0731052		23	23
47.1528	0.0485693		23	23
22.4021	0.0348538		23	23
53.4885	0.0276716		23	23
26.2026	0.0409791		23	23
4.26605	0.0530545		24	23
84.538	0.0225662		23	24
30.749	0.0444028		24	24
12.2049	0.0494888		22	24
48.4555	0.0379033		24	24
34.7996	0.0606742		23	24
14.2999	0.0439869		23	24
23.8717	0.0252722		24	24
30.7238	0.0234936		24	24
1.2433	0.0432355		25	24
42.9811	0.0352561		24	24
117.983	0.0240759		24	24
26.1108	0.0371708		24	24
1.87083	0.0443549		24	24
49.7798	0.0291409		25	24
50.765	0.0421282		24	24
12.7994	0.0301089		24	24
27.5121	0.0296755		24	24
56.0795	0.026638		24	24
14.1989	0.0367447		24	24
22.8509	0.0276388		25	24
4.27012	0.000194667		5	6
0.139952	5.09485e-05		2	4
5.95582	1.00062e-06		5	2
8.09702	1.53158e-05		5	4
11.3127	6.35745e-05		4	5
4.9681	4.33964e-05		5	4
11.2165	0.00017713		4	5
4.07668	0.00016822		4	4
2.98787	6.14391e-05		3	4
5.50538	8.28819e-05		6	5
1.13451	5.11062e-05		4	4
4.17785	0.000109571		4	5
5.09368	0.000266105		5	5
1.96322	0.00017427		4	5
13.5804	4.22158e-05		5	6
7.74705	2.08482e-05		4	5
5.83185	2.41587e-05		5	4
21.7389	0.000214041		7	5
2.66103	3.4873e-05		5	6
13.8201	0.000159802		5	6
11.327	0.000235264		5	5
23.4022	0.00100873		4	6
2.24083	0.000403994		7	6
7.23533	6.70427e-05		5	6
12.9974	0.000345935		5	6
19.0535	0.000496123		5	5
21.4247	0.000555683		5	6
2.57318	0.00043874		4	6
9.6616	0.000133956		6	6
5.24463	0.000328371		4	6
17.4144	0.000339768		6	6
2.66982	0.000135968		7	6
5.04026	0.000641199		6	6
5.66983	0.000255693		6	6
5.86605	0.000594685		7	6
14.492	4.05077e-05		6	5
14.6927	0.000251334		7	6
3.88554	0.000504785		6	6
6.97193	0.00061542		3	6
4.81489	0.000931125		6	6
7.60617	6.45872e-05		8	7
3.41563	0.000730612		5	7
9.541	0.00225436		5	7
1.01632	3.27664e-05		7	8
7.03257	0.000450572		6	7
17.5917	0.000315745		6	7
7.89782	0.000267609		8	7
8.63373	0.000931933		6	7
15.3741	0.000626949		8	7
25.8615	5.63698e-05		7	8
1.82245	0.000216298		10	7
6.93005	0.00251446		9	8
7.11286	0.00202365		7	8
7.01223	0.000254416		8	8
10.3037	0.000319934		8	7
8.49905	0.000504013		8	8
3.60574	0.000603481		9	8
12.1658	0.000277477		10	8
12.4055	0.000656326		8	8
7.78002	0.000121953		10	8
18.0177	0.00110163		8	9
13.3168	0.00135683		6	9
13.5868	0.00348457		8	9
7.18955	0.00115589		8	8
4.46904	0.000122161		8	8
16.8587	0.000449697		10	10
12.1999	0.00200973		8	8
4.89289	0.000339887		10	8
22.0885	0.00162704		9	9
10.0875	0.000346236		8	8
3.51139	0.00012718		9	9
2.85465	0.000921876		8	9
2.39637	0.00131351		11	9
8.95189	0.00178568		8	9
3.85204	0.000661373		8	9
6.79366	0.00221405		10	9
9.06562	0.00315488		9	9
4.65405	0.000579679		9	9
20.5243	0.0014915		7	9
13.4707	0.000310306		10	9
5.34774	0.000540896		9	10
0.882872	0.00111045		11	10
6.90267	0.00114968		10	10
0.998213	0.000852261		10	10
4.66008	0.000901112		8	10
6.00162	0.00218194		11	10
7.82293	0.00248714		10	10
12.6578	0.00058912		9	10
7.01487	0.0019812		10	10
1.97264	0.000180203		8	10
2.61781	0.000614629		10	11
0.283072	0.00177735		12	11
7.02244	0.00178998		9	11
2.11304	0.00221623		12	11
4.39647	0.00109732		12	11
2.43815	0.000910401		11	11
3.80256	0.00329483		10	11
3.3131	0.000558558		12	11
9.76781	0.00320674		11	11
7.13425	0.000283847		11	11
3.75859	0.0016192		12	11
5.15012	0.00420269		11	11
2.48089	0.000853773		11	11
7.62691	0.00282873		11	11
4.05305	0.000704798		11	11
7.54781	0.000860556		9	11
4.93729	0.00275948		10	11
3.52255	0.000541196		10	12
2.78601	0.00235389		12	11
2.82453	0.00202349		13	11
6.95164	0.00256582		12	12
1.27711	0.00515027		11	12
0.352872	0.00120973		12	12
3.64727	0.00624788		12	12
5.24863	0.00275201		12	12
4.31381	0.00193822		12	12
2.13764	0.0058001		10	12
5.36023	0.000711637		12	12
2.95255	0.000647149		13	12
10.1155	0.00162905		12	12
12.7274	0.00494465		13	13
0.328574	0.00404472		14	13
1.00312	0.0028397		12	13
2.32442	0.00484517		13	13
2.78903	0.00221018		10	13
3.43721	0.00283034		13	13
3.67277	0.00710682		13	13
4.78369	0.00298502		14	13
6.25465	0.00385648		13	13
6.68362	0.00348047		13	13
9.3697	0.00464727		13	13
3.4518	0.00389433		13	13
3.95508	0.0042999		15	13
0.946624	0.00780583		13	13
9.07044	0.002266		13	13
6.30624	0.00333154		13	13
3.35734	0.00876826		13	13
1.78191	0.00401779		13	13
3.29533	0.00475013		14	13
7.19219	0.00392122		13	13
9.20105	0.00722559		14	14
1.13541	0.00681338		13	14
2.11863	0.00641535		14	14
5.35366	0.0118122		14	14
3.23863	0.00458255		15	14
8.28625	0.00648173		14	14
16.0946	0.0202335		14	14
0.525187	0.0107667		17	14
0.64612	0.00724058		15	14
2.59209	0.00588824		14	14
9.57725	0.00696521		14	15
6.0134	0.0100621		14	15
9.21302	0.00835252		12	15
8.19152	0.00854298		15	15
1.76586	0.0122142		14	15
2.30484	0.00655562		15	15
8.32191	0.0135413		15	15
8.07529	0.00554755		15	15
2.50535	0.00862366		15	15
8.9992	0.00688155		14	15
17.8494	0.010065		16	16
5.76664	0.00831851		15	15
1.41834	0.00989578		15	16
16.0526	0.00709596		15	16
1.86648	0.0108309		16	15
5.06137	0.0103103		15	16
9.08314	0.00864384		15	16
2.86806	0.00675267		14	16
1.08137	0.00598506		16	15
2.36898	0.00715925		16	16
5.40844	0.0151096		15	16
8.63935	0.0141219		16	16
1.9467	0.0116223		17	16
1.48827	0.0158868		16	16
9.40767	0.0172115		16	16
1.81885	0.014141		16	16
5.58306	0.0138947		16	16
5.47283	0.00948995		15	16
1.61662	0.0125728		17	16
2.82199	0.0128991		17	16
1.62496	0.018426		17	17
17.1173	0.0149239		17	17
1.08877	0.0167088		17	17
1.3727	0.0176612		17	17
1.79442	0.0166821		17	17
4.00358	0.0149811		17	17
2.12796	0.0161991		18	17
0.474591	0.0181032		16	17
1.2572	0.0135373		17	17
1.82555	0.0172114		17	17
4.21498	0.0198525		18	18
5.45189	0.0156155		18	18
0.861665	0.0213474		17	18
14.2538	0.0169477		18	18
5.64789	0.0157944		17	18
1.38063	0.0150916		17	18
4.78101	0.0183992		16	18
16.9925	0.0243159		18	18
7.1854	0.0139877		18	18
2.71597	0.0214682		18	18
7.92497	0.0260273		18	18
1.96212	0.0217638		17	18
1.11539	0.0216505		19	18
11.7877	0.0220548		18	18
2.23253	0.0173747		16	18
3.48123	0.0283639		18	18
7.51734	0.019261		16	18
15.9395	0.0284877		18	18
1.71579	0.0165834		18	18
6.45795	0.0326195		18	18
1.28978	0.0358116		19	19
3.10115	0.0261074		19	19
7.05348	0.0298612		19	19
9.48206	0.0319045		19	19
1.64213	0.0234969		20	19
1.56444	0.0212819		19	19
8.46304	0.0323991		19	19
4.81288	0.0390807		19	19
6.05383	0.0351224		18	19
0.518242	0.0273748		18	19
2.71381	0.036833		20	20
3.95323	0.030145		19	20
1.43049	0.0298849		19	20
21.3989	0.0328514		19	20
1.90771	0.0275204		20	20
2.8054	0.0267553		19	20
3.56247	0.032851		20	20
1.89571	0.030573		20	20
2.29895	0.0216028		21	20
3.4911	0.0413924		20	20
3.03438	0.0361897		21	21
1.49087	0.0317693		19	20
4.48483	0.0291958		19	20
5.43738	0.0320618		20	20
2.34747	0.0334352		20	20
3.67486	0.0312746		20	20
9.27946	0.0304266		20	20
3.76671	0.0368911		20	20
6.20777	0.0258083		21	20
9.76566	0.0410744		20	20
14.9434	0.0630955		21	21
4.98322	0.0523498		22	21
4.51409	0.0517616		21	21
4.43757	0.0368673		21	21
1.00414	0.0573754		21	21
2.84407	0.0489003		20	21
13.0762	0.0566636		21	21
0.553755	0.0633863		20	21
8.8799	0.0420541		21	21
12.6983	0.0679385		21	21
3.03121	0.0377788		21	22
8.46189	0.0612664		22	22
2.06143	0.0597163		23	22
9.09878	0.0581347		21	22
1.07581	0.0586117		22	22
7.55948	0.0574447		21	22
20.4895	0.0621779		22	22
11.8903	0.0777768		21	22
8.86884	0.0371155		22	22
1.54884	0.0373996		21	22
5.23058	0.0474227		22	23
7.06256	0.0393221		23	23
7.19281	0.0474835		22	23
18.7521	0.0521804		22	22
1.04144	0.0501121		23	23
1.54761	0.0448662		23	22
15.707	0.051942		22	22
7.3064	0.0473909		23	22
9.24113	0.0362818		22	22
28.8179	0.0489336		23	23
2.66874	0.0498779		24	23
4.53056	0.0564512		23	23
12.1054	0.0594666		23	23
21.7979	0.0675966		23	23
7.0479	0.053418		23	23
7.8759	0.0537699		21	23
11.609	0.052595		23	23
2.00188	0.0635648		24	23
2.1398	0.0426213		25	23
14.9773	0.0702021		23	23
8.0268	0.0463544		24	24
4.58776	0.0511496		25	24
2.04898	0.0431028		25	24
8.19335	0.0516078		24	24
2.82318	0.0467547		24	24
1.85152	0.0527376		25	24
2.79895	0.0389014		23	24
5.39498	0.0586042		24	24
4.24469	0.0414264		24	24
25.3183	0.0665497		24	24
4.3544	0.0424804		24	25
1.58338	0.0343268		26	25
8.73911	0.0264014		24	25
4.5163	0.0339721		25	25
4.29111	0.0338604		25	25
3.40865	0.0421667		23	25
1.46004	0.0457978		24	25
3.40777	0.0334335		24	25
6.34447	0.0260092		25	25
16.61	0.0377089		25	25
14.0142	3.10655e-05		5	4
4.23448	1.50476e-05		3	4
15.1414	9.26968e-05		4	5
3.23203	1.7184e-05		4	4
0.621268	4.60085e-05		25	26
0.488561	3.42841e-05		25	27
1.65584	3.50843e-05		24	25
3.22363	4.10802e-05		26	27
2.6256	4.17142e-05		25	27
0.171896	3.9781e-05		29	25
10.0589	0.000904449		6	5
10.2681	7.27324e-05		5	5
6.55952	6.74055e-05		5	5
17.7001	0.000345664		5	5
4.34446	6.20063e-05		4	5
16.8545	4.30313e-05		5	5
17.799	0.000200702		4	6
6.04637	0.000118887		5	4
20.3954	4.411e-05		6	4
24.4337	0.000330369		5	5
4.93563	8.61198e-05		5	5
8.70113	8.77411e-05		6	5
6.0352	0.000326085		5	6
2.88583	0.000584828		6	6
15.0238	0.000209606		6	6
6.89825	4.66036e-05		7	6
3.46775	0.00025877		5	6
19.9223	9.14061e-05		5	6
12.4628	0.000214339		6	5
4.94677	0.000285689		4	5
11.6684	0.00029178		6	6
23.3542	0.000962609		5	6
8.78798	0.00254922		7	6
15.6396	0.000987749		6	6
16.5848	0.00041994		6	7
9.74812	0.0012649		4	6
13.3109	0.00103148		6	6
29.4282	0.000436863		6	6
7.87355	0.000361021		7	6
9.27672	0.000313634		9	6
1.61479	0.00159032		6	7
9.57467	0.00268711		7	7
4.89045	0.00161096		7	7
30.6128	0.00123538		7	7
15.3661	0.000810697		8	7
51.766	0.000420825		7	7
25.3165	0.00105055		7	7
0.585162	0.000695813		7	7
3.08777	0.000941543		7	7
15.7967	0.000453621		8	7
46.7431	0.00177702		7	8
13.1018	0.00232632		8	8
4.55222	0.00147217		7	8
18.2626	0.000756472		7	8
3.39779	0.00176198		8	8
98.3378	0.000115953		8	8
11.58	0.00138517		7	8
7.87875	0.0022376		7	8
14.2345	0.00122283		7	8
39.0035	0.00200409		8	8
70.6408	0.00278173		8	8
0.828319	0.00171431		7	8
30.4305	0.00107303		8	8
11.4688	0.000697397		9	8
12.3038	0.00350408		7	8
3.63459	0.000771576		8	9
37.8369	0.0014037		9	8
38.5217	0.00235092		8	8
14.4958	0.000872202		8	8
6.61325	0.00231632		8	8
12.9409	0.0026741		9	9
2.87073	0.00374131		10	9
16.5347	0.00256757		9	9
5.24421	0.00146436		9	9
2.41042	0.00265105		9	9
19.0948	0.00179196		9	9
26.472	0.00224422		8	9
29.1513	0.00187889		8	9
8.6175	0.00093819		9	9
10.0622	0.0018546		9	9
19.6604	0.00253429		10	10
3.17719	0.00753192		8	10
9.17167	0.00208601		10	10
1.3932	0.00202158		9	10
27.6125	0.00432309		9	10
19.324	0.00160807		10	10
2.56905	0.00252247		11	10
8.19466	0.00243496		11	10
12.8427	0.000555857		9	10
15.1433	0.00206745		10	10
24.0129	0.00312645		10	10
21.0474	0.00432238		10	10
5.6482	0.0018041		9	10
9.36714	0.0022581		10	10
2.78381	0.00217581		10	11
12.3092	0.00216327		11	11
1.92804	0.00317696		9	11
2.64154	0.00196794		12	10
14.1248	0.000971697		10	10
18.8873	0.00251068		10	10
6.9781	0.00739066		11	11
0.598879	0.00401204		10	11
3.53003	0.00232225		12	11
8.81883	0.00391331		12	11
1.67561	0.00398952		12	11
4.14427	0.00497293		11	11
1.09931	0.00337889		11	11
7.55505	0.00335122		9	11
11.2141	0.00102249		11	11
17.3258	0.0048729		11	11
13.4356	0.0104516		12	12
2.38619	0.0101952		12	12
9.98931	0.00520866		12	12
3.55458	0.00564949		11	12
12.4167	0.00525632		12	12
1.05608	0.00762578		15	12
0.675956	0.00491007		13	12
3.76055	0.0100092		12	12
21.7957	0.000970388		12	12
5.89959	0.00607608		13	12
14.0609	0.00517383		12	13
7.47962	0.00725942		13	13
11.9001	0.00778422		13	13
6.58517	0.00302276		12	13
7.17343	0.0060919		13	13
1.8345	0.00730279		13	13
11.1322	0.00627732		13	13
3.9639	0.00798651		13	13
18.6241	0.00064839		13	13
20.7334	0.00571959		13	13
1.39868	0.00684565		14	13
3.13466	0.00892903		11	13
3.10336	0.00863472		14	13
6.38681	0.00517025		13	13
8.29566	0.00771991		13	13
5.54647	0.0115415		13	13
4.79572	0.00935433		13	13
4.93493	0.0108984		14	13
18.5958	0.00190119		13	13
34.0369	0.00914605		13	13
10.189	0.0141326		14	14
7.61809	0.00832588		14	14
0.550713	0.00980823		15	14
19.9842	0.00613972		14	14
9.62915	0.0087387		14	14
2.14605	0.0106854		14	14
2.56122	0.0123172		14	14
4.04486	0.0137016		15	14
9.18584	0.0056338		14	14
33.5237	0.0149537		14	14
4.79353	0.0176534		14	15
8.07502	0.00990777		14	15
3.38257	0.009113		15	15
12.7856	0.00575694		14	15
7.46251	0.0126315		15	15
9.12089	0.0154774		14	15
0.738946	0.0118726		13	15
2.37328	0.0110993		16	15
4.48759	0.00562892		14	15
22.2349	0.012361		15	15
2.69221	0.0127849		16	16
6.34255	0.012018		14	15
4.0341	0.0109093		15	15
11.5199	0.00454538		15	15
15.9568	0.0129147		16	15
4.0061	0.0187491		15	15
9.29015	0.0122561		15	15
4.16511	0.0108992		15	16
15.7121	0.00664526		15	15
41.4457	0.0126663		15	15
11.8721	0.0140633		16	16
3.07379	0.0156871		15	16
8.33519	0.0173512		16	16
2.12337	0.00592494		17	16
14.1629	0.0183046		16	16
5.10909	0.0256328		16	16
0.674622	0.0152467		17	16
11.9984	0.0141494		16	16
1.53585	0.0123756		16	16
19.916	0.0133052		16	16
3.0721	0.0163786		16	17
8.33313	0.0186316		17	17
1.97637	0.0216444		15	17
4.81425	0.0123571		15	17
1.71848	0.0216966		17	17
8.41517	0.0272366		17	17
4.11651	0.0173429		17	17
1.31918	0.0152484		17	17
18.0265	0.017002		17	17
25.967	0.01846		17	17
10.7446	0.0161575		18	17
10.7422	0.0147264		17	17
14.0513	0.013496		17	17
10.2235	0.0144595		17	17
10.2723	0.0194944		18	17
2.06916	0.0208178		16	17
18.028	0.016058		18	17
10.0685	0.0143501		17	18
7.79742	0.01195		17	17
6.37325	0.0166647		18	18
17.6011	0.0210619		18	18
4.31672	0.0247167		18	18
4.26227	0.0237764		19	18
10.0397	0.0271211		18	18
4.57319	0.0254597		18	18
4.41351	0.0332444		18	18
16.556	0.0243699		18	18
11.8633	0.0210441		18	18
6.73633	0.0211054		18	18
2.63671	0.0252915		20	18
9.31992	0.0330348		19	19
8.33963	0.0276329		19	19
10.7635	0.0262779		19	19
34.1118	0.0428556		19	19
15.8642	0.0300664		19	19
1.7044	0.0345625		20	19
34.4742	0.0185446		19	19
19.9626	0.027146		19	19
13.5824	0.0227561		19	19
4.68612	0.0242687		17	19
10.7503	0.0259069		19	20
12.6782	0.0341645		20	20
12.5863	0.0279668		20	20
30.0248	0.0354149		19	20
4.42474	0.0291213		20	20
4.68165	0.0417493		19	20
20.2737	0.0191871		19	20
1.96642	0.0237615		19	19
4.52408	0.0225331		19	20
5.88371	0.0232067		18	20
10.9524	0.0312231		20	20
11.4707	0.0357128		20	20
15.1397	0.0355635		20	20
34.5289	0.0513222		20	20
4.29866	0.0377749		20	20
5.60241	0.0424647		21	20
3.07627	0.0266935		20	20
2.28592	0.0259446		18	20
54.4792	0.0450796		20	20
6.67466	0.027627		19	20
5.70133	0.07019		19	21
14.226	0.0439978		21	21
5.01001	0.0432026		21	21
46.3346	0.0518734		21	21
6.08285	0.0578108		21	21
15.3923	0.0482227		21	21
4.43335	0.0415917		21	21
10.0743	0.0463752		20	21
45.5544	0.053413		21	21
3.56583	0.0403265		20	21
9.20725	0.04677		22	22
3.81569	0.0373082		23	22
15.9377	0.0436948		22	22
10.9577	0.0466863		22	22
3.98888	0.0533615		22	22
6.33145	0.04633		22	22
39.4707	0.0358442		21	22
4.94439	0.0365045		26	22
58.7519	0.0580715		22	22
0.587221	0.0445651		23	22
19.8751	0.046529		22	22
8.70973	0.0589001		23	22
28.2314	0.0416251		22	22
12.6791	0.0408518		22	22
2.30424	0.0443802		23	22
20.9362	0.0387199		22	22
39.4813	0.0501709		22	22
6.01242	0.0481673		23	22
6.7597	0.0592595		22	22
0.90996	0.0478835		23	22
9.72062	0.0531209		24	23
4.68672	0.0562089		23	23
2.68599	0.0617434		21	23
20.2062	0.0585479		23	23
8.94758	0.0607998		23	23
2.75359	0.0578852		23	23
41.4522	0.059328		23	23
8.46829	0.0569698		23	23
29.7294	0.0602523		23	23
8.95793	0.0598152		23	23
11.7963	0.0504503		24	24
23.6875	0.0468181		24	24
9.64156	0.0498621		24	24
10.1691	0.0513373		24	24
7.41008	0.0520265		26	24
6.41044	0.0503468		23	24
8.92822	0.0485388		24	24
8.78392	0.0481171		24	24
16.3408	0.0577776		24	24
11.3657	0.0427736		23	24
2.01152	0.0313096		24	24
5.3799	0.0300334		24	24
4.16982	0.0330739		25	24
5.12149	0.0386628		24	24
4.32745	0.0360842		25	24
2.28779	0.0413887		24	24
7.68461	0.0365764		24	24
35.9473	0.0335255		25	24
2.02349	0.0398744		24	24
6.54136	0.0401045		25	24
5.05389	0.000181815		3	4
4.45576	5.9642e-05		4	4
3.91686	1.55868e-05		3	4
6.92315	0.000172339		4	4
24.9673	0.000110824		5	4
40.5527	6.68936e-05		5	4
14.5528	3.91932e-05		4	4
12.3828	3.21492e-05		4	4
10.5038	5.55565e-05		4	4
0.811479	8.8126e-05		3	6
3.52647	2.0839e-05		4	5
21.2946	0.000222552		5	5
6.31173	6.06031e-05		5	5
14.765	0.000346505		5	5
2.55301	0.00030942		6	5
2.74609	9.94283e-05		4	5
7.07713	0.000415048		5	5
14.0097	0.000103046		5	5
12.0796	0.000165874		5	5
4.91589	3.08561e-05		4	5
13.2263	7.6708e-05		5	6
35.2547	0.000153726		5	6
2.45053	0.000171649		7	6
13.9225	0.000415307		5	6
0.843275	0.000364379		6	6
21.1322	7.07988e-05		5	5
19.8633	0.000487292		5	6
26.6268	0.000183569		6	6
7.90695	0.000452998		6	6
2.50037	0.000146001		5	5
6.48611	0.000185989		5	7
30.9397	0.000211244		6	7
10.83	0.000343368		6	6
4.57051	1.75858e-05		7	6
42.247	0.000845784		6	7
10.1938	8.68834e-05		7	6
4.35979	0.000386098		6	7
15.9157	0.000336362		7	6
24.0727	0.000866077		6	6
1.21416	0.000106022		6	6
15.9131	0.000139817		7	7
3.62404	0.00150666		7	7
3.07807	0.000861836		5	7
15.7315	0.000193863		7	6
55.2091	0.00209677		7	7
14.8722	0.000112956		6	7
29.1682	0.00015049		6	7
24.6914	0.000681516		7	7
30.1659	0.00158535		7	7
14.3182	0.000249147		7	7
20.8912	0.000318164		8	8
18.4161	0.000746122		7	8
6.8542	0.000871176		8	8
3.84664	0.000617689		9	6
6.9477	0.000530173		10	8
4.41403	8.54232e-05		8	8
21.5017	6.18171e-05		8	6
2.69129	0.00100924		7	8
12.9129	0.00149209		8	8
13.8992	0.00113553		7	8
8.50745	0.000486594		9	9
17.0654	0.000987946		8	8
10.516	0.000841544		9	9
3.48576	0.000714183		6	8
9.57214	0.00104684		9	9
9.29386	0.00012544		9	8
0.928724	0.000320201		9	8
6.96721	0.00100015		8	8
30.3644	0.00108902		9	8
7.77893	0.000294172		9	8
4.5848	0.00040648		11	9
6.03269	0.00150006		9	9
19.4494	0.00160236		9	9
11.329	0.000283824		10	10
14.0069	0.00214502		8	9
14.8068	8.90599e-05		9	9
4.62693	0.00152375		9	9
11.3995	0.000764103		10	9
23.833	0.00250562		10	9
20.3779	0.000479039		9	9
6.92421	0.00115614		10	10
10.1934	0.00169542		10	10
19.8028	0.0029396		10	10
11.125	0.000606243		10	9
16.4764	0.000801148		10	10
2.2975	0.000107098		13	10
3.96542	0.00106856		8	10
7.78189	0.000714323		9	10
19.9	0.00287199		9	10
19.5144	0.000469105		10	10
14.3544	0.000815046		11	11
2.97043	0.00288428		10	11
30.2784	0.00353312		11	11
11.1747	0.00133785		10	11
14.2678	0.00105225		11	11
13.7328	0.000504491		11	10
3.29664	0.000809259		11	11
9.40929	0.00224299		12	11
8.76379	0.00216801		10	10
12.188	0.000253077		11	11
8.13703	0.00265851		11	11
13.1502	0.00296266		9	11
42.5595	0.0064281		11	11
15.4813	0.000875739		12	11
15.5788	0.00458937		9	11
9.40237	0.000896045		12	11
6.87683	0.00638149		12	11
32.2252	0.00371341		12	11
8.61363	0.00291263		13	11
8.38571	0.00050397		11	11
2.75766	0.00442224		14	12
10.5198	0.00390166		11	12
14.142	0.00889528		12	12
7.81528	0.00078799		13	12
8.45825	0.0041975		10	12
19.5019	0.00134825		12	12
17.3546	0.0107652		12	12
45.8211	0.00541598		12	12
7.07714	0.00346844		13	12
23.8614	0.00237057		12	12
8.38092	0.00607192		13	13
16.4981	0.004474		12	13
7.32651	0.00869079		13	13
1.68778	0.00198329		13	13
4.00477	0.0025216		13	13
9.67318	0.00158305		12	13
2.23639	0.00332276		16	13
12.0316	0.00301026		12	13
4.86514	0.00417255		15	13
3.35756	0.0032411		13	13
11.0973	0.00690478		13	13
7.73651	0.00178526		10	13
5.16458	0.00986555		13	13
4.1407	0.00577411		12	13
28.4159	0.00338897		13	13
5.87775	0.00249084		13	13
8.61784	0.00595815		13	13
3.39574	0.00449483		11	13
28.976	0.00425833		13	13
8.26625	0.00394393		13	13
5.25828	0.0103893		17	14
3.52396	0.00729481		14	14
15.4114	0.0129571		15	14
62.268	0.005548		14	14
2.90719	0.00778977		14	14
11.4955	0.00634388		14	14
5.17093	0.00762292		14	14
16.9474	0.00399307		14	14
18.6997	0.00429785		14	14
12.6638	0.0132025		14	14
23.526	0.0140065		15	15
4.01658	0.00470081		14	15
3.50546	0.00854917		18	15
7.40724	0.00831774		14	15
27.0479	0.00855293		15	15
9.48294	0.00625733		15	15
6.68246	0.010687		14	15
4.75519	0.00874441		15	15
57.2551	0.00691278		15	15
19.1212	0.0112463		14	15
14.0626	0.00996489		16	15
16.7897	0.00613115		16	15
20.7793	0.0069226		15	16
24.9819	0.0117157		15	15
6.92195	0.00753014		16	15
8.79541	0.00893525		15	16
13.7166	0.00867651		15	15
23.9797	0.00701497		15	16
15.1672	0.00517617		15	15
4.70037	0.0166166		16	15
3.97962	0.023872		16	16
13.3811	0.0106012		16	16
7.40643	0.0147395		15	16
15.3972	0.0180671		15	16
39.3287	0.0124134		16	16
48.6276	0.0103635		16	16
33.6212	0.025914		16	16
12.3506	0.0106221		15	16
11.5224	0.00906644		16	16
21.532	0.0161187		15	16
42.5101	0.0185295		17	17
19.4507	0.0114635		17	17
25.1398	0.0253938		17	17
16.8315	0.015469		16	17
5.13516	0.0185363		17	17
4.84346	0.017801		17	17
51.4253	0.0165144		17	17
5.46631	0.0122598		17	17
53.8401	0.0126226		17	17
1.98395	0.0170467		18	17
55.7749	0.0164307		18	18
18.4335	0.0136998		18	18
14.0652	0.0213028		17	18
22.5425	0.0096275		17	17
21.0786	0.016673		18	18
13.2935	0.0305393		17	17
50.9437	0.0262284		17	18
7.61389	0.0111944		17	18
9.96029	0.0123183		17	18
7.89953	0.0119648		18	17
24.6691	0.0175682		18	18
24.9461	0.0167589		19	18
8.63774	0.0284337		19	18
48.5989	0.00705816		18	18
59.9832	0.0141491		18	18
3.68448	0.0454087		17	18
46.4096	0.0248601		18	18
16.1961	0.0203923		18	18
3.80972	0.0172343		18	18
7.19076	0.0212801		18	18
21.0236	0.02874		19	19
24.6859	0.0174359		19	19
9.69223	0.0303864		18	19
10.5662	0.0141492		19	19
47.9075	0.019297		19	19
15.2463	0.0518056		19	19
47.6387	0.0260479		19	19
7.83428	0.0179904		19	19
35.5073	0.0142389		19	19
26.9917	0.0247368		19	19
32.5518	0.0317299		20	20
27.3064	0.0255777		20	20
4.36562	0.0337506		19	20
26.1031	0.0208563		20	20
61.3011	0.0232215		20	20
3.76384	0.0421503		20	20
57.1152	0.024846		20	20
6.93092	0.0207283		19	20
7.88812	0.0164576		19	20
7.34023	0.0246947		20	20
23.0398	0.0289502		21	20
19.0766	0.029166		20	20
12.2261	0.0283984		20	20
36.4323	0.0228546		20	20
20.0864	0.0204923		20	20
15.8012	0.0253391		20	20
64.2588	0.0250991		20	20
5.00796	0.0281414		20	20
38.3651	0.0257738		20	20
8.72873	0.0229605		21	20
19.9658	0.0361231		22	21
4.78595	0.0332993		21	21
15.4816	0.0408803		21	21
27.8378	0.026212		21	21
28.8748	0.0323727		21	21
6.26568	0.0449202		21	21
37.7818	0.0361509		21	21
2.68382	0.0280646		19	21
33.3522	0.03291		21	21
7.1537	0.0394117		21	21
63.9239	0.0304402		22	22
27.8361	0.0380259		22	22
24.8216	0.0445063		22	22
22.6664	0.0260792		22	22
63.1464	0.0239979		22	22
36.288	0.0303319		22	22
20.835	0.0417699		22	22
2.41258	0.0357724		20	22
40.4108	0.0221273		22	22
24.5309	0.0335431		22	22
16.8465	0.0244659		22	22
25.6117	0.0265623		23	23
8.96451	0.0320257		23	22
17.5626	0.0264077		22	22
12.85	0.0301738		23	22
29.7197	0.0289161		22	23
27.7941	0.0378697		22	22
2.48362	0.0268892		21	22
4.26807	0.0287719		22	22
38.2221	0.0355165		22	22
28.0022	0.0363474		23	23
18.3627	0.0555514		23	23
42.6075	0.0509233		23	23
32.4516	0.0367446		23	23
7.39507	0.0415942		24	23
21.7363	0.0324627		23	23
44.8427	0.0505834		23	23
6.99635	0.0423769		23	23
4.37638	0.0444357		24	23
28.3725	0.0442241		22	23
92.436	0.0484157		24	24
13.4537	0.0658839		24	24
36.0582	0.0535801		24	24
36.1103	0.0461522		24	24
10.7693	0.0557057		24	24
9.47069	0.0460193		23	24
6.13422	0.0539923		24	24
4.94845	0.042165		24	24
3.45942	0.0553411		25	24
80.3839	0.0391769		24	24
49.5094	0.0505607		24	25
31.1989	0.0548426		24	25
6.3871	0.0369249		24	25
20.0189	0.0396721		24	25
19.0415	0.0455694		25	25
9.29233	0.0268706		25	25
10.2606	0.0400505		25	25
3.74865	0.0411104		24	25
4.17373	0.0447654		25	25
48.761	0.0387376		25	25
82.7948	0.000127389		5	5
7.38637	1.38579e-05		4	5
25.7928	0.000366233		8	5
6.02829	5.61391e-05		4	5
47.6926	0.000109416		5	5
44.6198	4.10412e-05		4	5
34.7123	0.000184891		4	5
91.3804	4.0786e-05		5	4
15.588	0.000108372		5	4
12.1591	0.000144869		6	5
15.9878	0.000245138		5	5
18.3132	8.10563e-05		6	5
72.0233	0.000987922		6	5
101.855	0.000105596		4	5
19.3784	0.000227497		7	5
69.0341	0.000185104		5	5
77.2263	0.00020433		4	5
110.713	0.000134373		5	4
14.1724	0.000477254		5	5
57.3477	0.000596143		4	5
50.4949	0.000464808		6	6
67.7938	0.000592933		7	6
25.1707	0.00157061		6	6
20.5171	0.000456295		7	6
149.807	0.000342871		5	6
13.6484	0.000384668		6	6
82.4224	0.000170017		5	6
15.5611	0.000100005		6	6
54.2313	0.00219809		6	6
50.0168	0.0027998		7	6
61.3623	0.00106773		5	7
53.2906	0.000530114		6	7
14.4275	0.00123964		5	7
9.31971	0.00167332		7	7
41.0641	0.000514443		6	7
18.5837	0.000451215		5	7
26.1228	0.00041449		4	7
21.2588	8.46324e-05		7	8
25.0715	0.00145211		9	7
12.6855	0.00323723		7	7
169.535	0.00158091		5	7
37.465	0.000536711		6	7
59.1963	0.00106183		4	7
5.67518	0.00349589		9	7
4.02323	0.000767332		7	7
27.9624	0.00092848		7	7
11.8031	0.000868512		8	7
57.8436	0.00077566		5	7
29.7892	0.00218915		8	7
13.6588	0.00273786		9	7
215.381	0.0020499		5	8
110.954	0.000268184		6	8
15.3733	0.00129839		7	8
56.2242	0.00432795		6	8
14.8188	0.00123573		9	8
32.5831	0.00119112		8	8
9.24206	0.00205107		7	8
6.18364	0.00187368		9	8
9.32038	0.00336152		8	8
22.4557	0.00308633		7	8
21.593	0.0025053		9	9
8.87049	0.00195636		9	9
5.91237	0.00273306		8	9
8.84773	0.00392234		8	9
7.36049	0.00141194		9	9
17.0492	0.00158766		9	9
8.76326	0.00152383		9	9
19.6896	0.00183586		9	9
34.8897	0.0042747		9	9
6.25285	0.00210409		9	9
33.7988	0.00155313		9	9
64.1249	0.00212974		5	10
24.0624	0.00209795		10	9
2.54971	0.0034176		8	9
38.747	0.00117494		9	9
34.4694	0.00188671		9	9
38.048	0.00101365		9	9
2.35315	0.00068493		11	10
13.4001	0.00436318		8	9
8.41864	0.000856928		9	9
21.4084	0.00282692		11	10
14.3697	0.00414426		10	10
18.2244	0.00397131		9	10
19.8302	0.00413181		10	10
34.3767	0.00282842		10	10
35.6731	0.00295118		10	10
28.7315	0.00183527		10	10
10.585	0.00250275		9	10
12.1313	0.0048743		8	10
18.4788	0.0026689		10	10
34.5197	0.00214205		11	11
18.5958	0.00529207		12	11
26.4401	0.00606876		11	11
11.6269	0.00407582		11	11
17.1125	0.00346494		11	11
18.9719	0.00406664		11	11
22.1171	0.00250514		10	11
5.2475	0.00390607		9	11
5.56855	0.00407101		10	11
5.87607	0.00142892		12	11
27.5785	0.00139037		11	12
4.19359	0.0084345		12	12
10.3043	0.00327333		10	12
26.8656	0.00409525		13	12
13.202	0.0037236		12	12
4.08001	0.00352803		13	12
12.663	0.00209088		11	12
27.3092	0.00203635		11	12
33.2456	0.00202464		12	12
2.79676	0.000866405		12	12
9.06831	0.00230398		11	12
18.5452	0.0115422		12	12
12.5668	0.00537893		13	12
9.15333	0.00653378		12	12
11.4627	0.00562868		12	12
59.9853	0.00513917		12	12
43.8709	0.00231174		12	12
24.5773	0.00594794		13	12
32.8683	0.00393668		13	12
31.4648	0.00313944		12	12
4.39439	0.000830908		12	13
32.1187	0.0149357		13	13
15.3694	0.0111816		15	13
7.1033	0.00875741		14	13
54.0253	0.00483592		13	13
21.9876	0.00660293		13	13
45.1077	0.0032069		13	13
34.7917	0.00782044		14	13
30.1887	0.00278727		13	13
5.8841	0.00438094		14	13
6.45097	0.00386744		15	14
28.5099	0.0124814		13	14
9.74128	0.0115954		15	14
15.4869	0.00949785		15	14
18.8012	0.00562224		14	14
11.3713	0.00649971		13	14
21.4324	0.00357549		13	14
21.989	0.0105422		12	14
48.7277	0.00264466		14	14
6.44481	0.0040904		14	14
9.87697	0.00382704		13	14
7.00103	0.0137377		14	14
12.5756	0.00689502		14	14
25.4706	0.00954436		14	14
32.7591	0.00629124		16	14
34.719	0.0078457		14	14
15.8379	0.00398486		12	14
15.0593	0.0090747		16	14
7.09132	0.00382127		12	14
3.67777	0.00465185		14	14
6.60382	0.00774825		13	15
39.7977	0.0181657		15	15
16.8469	0.00933329		14	15
28.3088	0.0107955		15	15
44.5275	0.0062134		15	15
24.2919	0.0105943		15	15
11.3069	0.00585839		15	15
64.9566	0.0105508		15	15
3.67376	0.00464654		15	15
26.6668	0.00586176		15	15
23.9317	0.00997519		16	16
12.5455	0.0192866		15	16
9.11778	0.0115612		16	16
11.3312	0.010087		15	16
12.7266	0.0116156		16	16
24.703	0.0101715		16	16
52.913	0.00880045		16	16
70.1581	0.00531903		16	16
33.0476	0.00556652		16	16
25.764	0.00641413		16	16
17.3784	0.0144224		17	17
10.1042	0.0159178		15	16
62.7779	0.00798412		16	16
16.7106	0.00995651		16	17
37.8779	0.00775654		17	16
15.3326	0.0130268		16	16
17.6536	0.00382433		16	17
26.9829	0.00930995		17	16
26.0377	0.00552715		17	16
8.85489	0.00900451		17	17
4.71031	0.0188629		17	17
51.5808	0.0239833		17	17
18.2645	0.0144975		15	17
8.37844	0.0126381		16	17
14.0662	0.0118831		17	17
15.3474	0.0187788		17	17
9.437	0.00732024		17	17
12.582	0.00719037		17	17
12.2027	0.0101535		17	17
37.3178	0.00900512		17	17
32.4672	0.0226918		18	18
35.6604	0.0239461		18	18
23.8512	0.0215413		17	18
22.0992	0.0211681		18	18
9.44294	0.014652		18	18
7.71133	0.018197		18	18
19.4293	0.00676347		18	18
29.7021	0.0128058		18	18
35.6916	0.0132584		17	18
32.9286	0.00867764		18	18
5.99319	0.0179088		19	18
40.7047	0.0204553		18	18
81.2185	0.0164732		18	19
4.03787	0.0173793		17	19
3.17574	0.00773519		18	19
4.72523	0.0184838		18	19
23.27	0.00853224		17	19
43.8229	0.00945329		18	19
76.8766	0.0140038		18	19
16.6869	0.00660764		19	19
28.1789	0.0334484		19	19
9.14613	0.0329444		18	19
62.6091	0.0288174		19	19
52.3919	0.0264827		19	19
39.9	0.0259554		20	19
9.55254	0.0247427		21	19
3.25564	0.0134753		18	19
18.5872	0.0198092		19	19
98.8436	0.0230238		20	19
72.7015	0.0113867		19	19
3.758	0.0207408		21	20
4.11482	0.0401811		20	20
155.399	0.0360839		20	20
4.39165	0.0325659		20	20
11.9265	0.0330107		21	20
6.63132	0.019381		20	20
21.0513	0.013916		20	20
8.97782	0.0174542		20	20
1.32045	0.023196		18	20
3.53381	0.0120595		20	20
18.4264	0.018235		21	21
13.6025	0.0398363		21	21
103.309	0.030548		21	21
48.5174	0.0312946		21	21
6.15247	0.0370813		20	21
2.23246	0.0347064		21	21
23.5225	0.00952149		20	21
54.0469	0.0257716		21	21
32.2731	0.0217087		20	21
37.3613	0.0121503		20	21
5.285	0.0260679		21	21
15.0484	0.0457627		19	21
108.196	0.0212097		21	21
17.1958	0.0456482		20	21
16.7152	0.0272215		21	21
14.7824	0.0186066		21	21
17.6936	0.0263424		21	21
78.7461	0.032166		21	21
38.3723	0.0318386		22	21
44.8782	0.0187982		21	21
16.2348	0.0226109		23	22
0.855232	0.044212		21	22
20.8519	0.0356218		22	22
11.4181	0.0623499		21	22
15.6064	0.0533928		22	22
12.7988	0.0288775		22	22
11.1774	0.0295127		20	22
36.3897	0.0467729		22	22
46.3768	0.0326614		22	22
31.0492	0.0267329		22	22
96.2068	0.0185077		23	23
45.6901	0.0602562		22	23
63.0141	0.0346521		23	23
56.5869	0.0494509		23	23
31.3947	0.0416759		23	23
47.3951	0.0538696		22	23
17.9349	0.0355227		23	23
57.5867	0.0360051		23	23
40.2948	0.0325797		23	23
79.6374	0.0295997		23	23
54.0834	0.0281986		23	23
20.0217	0.0404187		23	23
133.179	0.0317276		23	23
162.178	0.0361165		23	23
13.7207	0.024924		23	23
9.35274	0.0427033		22	23
38.7485	0.0311488		23	23
45.5465	0.0410102		24	23
60.9222	0.0383907		23	23
13.3843	0.029253		24	23
86.5341	0.0284251		24	24
15.0555	0.0679822		24	24
119.684	0.0476468		24	24
93.5804	0.0402236		24	24
28.9904	0.0300629		22	24
17.2011	0.0625676		23	24
40.2882	0.0457367		23	24
18.4207	0.0489658		24	24
72.3905	0.0485847		24	24
34.5289	0.0407687		24	24
23.6893	0.0325234		24	25
22.8463	0.0551787		25	25
8.74109	0.0395606		25	25
97.2859	0.0317858		25	25
30.0419	0.0243877		25	25
10.2826	0.040629		25	25
7.5948	0.0291393		25	25
113.965	0.0405251		25	25
27.9797	0.0401581		25	25
15.9316	0.0381883		24	25
33.8054	7.68227e-06		5	3
4.41487	2.05634e-05		3	4
6.65342	0.000294509		5	6
16.2565	0.000115327		5	5
2.42543	0.000444447		4	5
5.45228	0.000254112		4	4
9.03382	2.29243e-05		4	3
13.3561	9.70038e-05		5	5
3.80643	3.48692e-05		4	5
5.81986	9.26141e-05		4	4
17.6822	0.0001376		5	7
0.697899	5.6032e-05		3	5
8.88726	4.08129e-05		4	5
21.9905	0.000310064		5	4
9.81659	0.00118117		6	5
21.4203	0.000261025		6	5
6.78562	0.000185633		5	5
7.14934	0.000209136		6	6
3.14603	3.59048e-05		5	5
2.7102	9.27737e-05		5	5
3.8541	0.000357731		7	5
1.62997	0.000400162		5	6
10.087	5.35875e-05		7	6
1.41173	0.00031563		7	5
22.0746	0.000167209		5	5
6.74726	0.000674821		5	6
16.6181	8.8118e-05		5	5
6.88411	8.68385e-05		5	6
3.86974	0.000254849		4	5
8.15998	5.95297e-05		6	6
6.19997	0.000184764		6	6
44.2413	0.000273743		6	7
44.6554	0.000229058		6	6
7.55762	0.00061353		5	6
2.1619	0.000559114		4	6
20.5987	0.00128583		5	6
18.4601	0.000739354		6	7
15.8177	0.000545076		6	6
11.2724	0.000379488		6	6
2.82191	0.000471486		4	6
16.34	0.000546632		6	7
16.6539	0.000547347		6	8
5.21176	0.000227131		6	7
5.63508	0.000770324		6	7
4.20446	0.000126067		6	6
22.6707	0.000415151		7	7
21.5697	0.000342372		7	7
16.3607	0.000775504		7	7
7.55709	0.000399489		8	7
13.4171	0.000396475		7	7
13.4415	0.000399958		7	8
9.43733	0.00180628		7	8
13.4744	0.000217382		6	8
7.89092	0.00099327		7	8
11.5991	0.00102816		6	7
31.3463	0.000461124		8	8
7.20628	0.000928729		7	8
3.90832	0.00168642		8	8
20.762	0.00012512		8	7
7.74781	0.00025037		7	9
6.23862	0.00289891		9	8
1.23409	0.000388327		7	9
14.0905	0.00123521		8	8
7.78	0.000914499		8	8
2.79328	0.00155992		8	9
7.45814	0.000923351		6	8
5.14718	0.000902672		8	8
11.5229	0.00115825		7	8
4.58966	0.000673114		8	9
8.59433	0.000523444		8	9
6.98463	0.00258406		9	9
23.3903	0.00175432		9	9
4.38467	0.00251018		11	9
1.34535	0.00224223		7	9
10.6008	0.0028989		9	9
10.9232	0.00398049		9	9
8.0879	0.000428789		10	9
6.91137	0.00192621		8	9
6.44057	0.00140555		9	9
5.09893	0.000876976		9	9
9.1273	0.00227655		10	10
1.95401	0.00305395		8	10
0.934056	0.00299831		11	10
4.65151	0.0012795		10	10
17.8144	0.00228561		10	10
10.8475	0.00113961		9	10
6.43376	0.000408872		9	10
11.6019	0.00358605		7	10
7.7432	0.0030273		9	10
3.20683	0.000247303		9	10
11.0103	0.00236832		11	10
6.72672	0.00255593		10	10
10.6836	0.00382303		9	10
3.11755	0.00177225		10	11
5.85635	0.00201701		10	11
2.85791	0.00123687		7	10
2.54881	0.000847503		8	11
7.98093	0.00315317		11	10
3.16201	0.0012976		10	10
16.3286	0.00138813		10	10
14.7629	0.00447442		12	11
3.63106	0.00364942		10	11
18.6226	0.00460501		11	11
3.41394	0.00430185		11	11
2.00721	0.00442274		10	11
6.21843	0.00372661		9	11
6.59024	0.00191934		11	11
2.39203	0.00158587		13	11
6.73681	0.00414677		12	11
1.50665	0.00263796		10	11
14.5086	0.00433301		13	12
5.3976	0.00286917		12	12
6.95475	0.00660364		11	12
4.68546	0.00458512		12	12
4.43394	0.0038008		12	12
2.67677	0.00277964		12	12
28.7019	0.00317336		12	12
0.974469	0.00206807		12	12
5.89491	0.00226566		12	12
3.08414	0.00246451		12	12
11.4786	0.00510863		13	13
2.72417	0.00367572		12	13
13.0217	0.00340484		12	13
1.0089	0.00425876		13	13
3.97177	0.00785441		10	13
7.03955	0.00354486		11	13
6.22743	0.00209786		13	12
5.03159	0.00345186		16	13
3.58972	0.0023094		11	13
4.37775	0.00330001		13	13
5.48596	0.00781113		13	13
5.27395	0.00258586		14	13
4.05827	0.00414576		13	13
1.92716	0.0059467		13	13
5.3997	0.00988949		13	13
2.23287	0.00291415		14	13
2.62681	0.00314656		13	13
0.951494	0.0043561		12	13
1.74322	0.00313028		13	13
3.42207	0.00485388		13	13
2.20699	0.00770305		13	14
1.494	0.00726077		14	14
2.21697	0.00651597		12	14
1.72492	0.00865523		15	14
0.860516	0.00962429		15	14
1.30136	0.00750079		15	14
1.50201	0.0100739		13	14
3.00815	0.00982883		13	14
8.72639	0.00366363		16	14
4.11292	0.00726749		14	14
1.47728	0.0126707		15	15
5.46245	0.00852686		15	15
4.95442	0.00888224		14	15
1.7636	0.0143635		14	15
12.0227	0.0118387		14	15
2.82635	0.0061315		13	15
3.46879	0.013929		15	15
10.9482	0.0114479		15	15
3.12469	0.00555718		15	15
0.736242	0.00881679		14	15
4.339	0.00873401		16	15
1.86935	0.0104769		14	15
0.621458	0.00929475		15	15
4.02402	0.00865722		15	15
1.61715	0.0110052		16	15
6.8249	0.00575789		16	15
12.8348	0.00822856		16	15
0.484272	0.00509605		16	15
1.70645	0.00491217		14	15
2.73603	0.0084676		15	15
7.67326	0.014518		16	16
4.35315	0.0183887		16	16
4.65913	0.0149296		16	16
3.20555	0.0150987		17	16
5.45253	0.0147324		16	16
1.93547	0.00832162		16	16
11.0038	0.0141249		16	16
6.82941	0.012571		16	16
5.68559	0.0126185		16	16
8.20029	0.0189009		17	16
5.25851	0.0162646		17	17
1.88555	0.0167166		18	17
4.9694	0.0153083		16	17
3.7871	0.0153337		16	17
1.22539	0.0176581		17	17
4.11037	0.0125638		16	17
1.34511	0.0163476		16	17
1.87754	0.0119262		16	17
15.4282	0.012074		16	17
1.13964	0.0131522		15	17
5.09404	0.0130328		16	17
3.66623	0.00861003		17	18
8.48212	0.0143815		18	17
3.82055	0.0138976		17	18
18.8294	0.0130072		17	17
11.6096	0.0133737		17	18
[truncated: 404 more rows]

## Sheet: Fig6 C, D, E, I, L, M, N, Q
Fig 6C									Fig 6D									Fig 6E									Fig 6I					Fig 6L								Fig 6M								Fig 6N
Linear Chirp Peak Frequency & Ampltiude									Linear chirp Xcorr									Linear Chirp Cerebellar-Motion Correlation									Single unit 2D corr					Complex Chirp Peak Frequency & Ampltiude								Complex chirp Xcorr								Complex Chirp Cerebellar-Motion Correlation
Amplitude			Frequency																													Amplitude			Frequency
CB	Motion		CB	Motion																								Original	Shuffled			CB	Motion		CB	Motion
369.398	1240.57		4	4					Baseline	Light on	Light off							Shuffled	Motion	Frequency Peak	Amplitude Peak						unit 1	0.149169	0.127313			3933.81	175.083		4	5				Baseline	Light on	Light off						Baseline	Motion
1430.74	1451.69		1	5					1141149	2166785	819607							0.0232518	0.299819	0.973957	0.18635						unit 2	0.298319	0.144795			11211.1	425.213		5	6				107172	4.65582e+06	75453.5						0.0161199	0.318267
91.9921	140.389		5	5					1847872	3182430	1055353							0.0221863	0.471631	0.997454	0.0920125						unit 3	0.225863	0.102928			22456.5	622.967		6	6				1.02449e+06	4.11217e+06	980319						0.0158967	0.245694
425.856	1662.93		6	6					845339	11399035	832022							0.0235594	0.344994	0.997244	0.0786288						unit 4	0.219015	0.0917146			23190.9	2079.97		7	7				110079	7.94002e+06	715732						0.0158698	0.320358
378.674	2061.87		7	7					992648	8548749	641495							0.026122	0.336359	0.996045	0.194172						unit 5	0.274727	0.119823			16692.4	2141.43		8	8				430761	3.89976e+06	538416						0.0176448	0.374768
195.648	3147.68		7	8					6499799	24198016	7035004							0.0214917	0.183115	0.918371	0.15126						unit 6	0.174417	0.0831403			8270.63	1714.08		9	9				162055	1.76311e+06	224963						0.0158817	0.368569
221.865	5226.77		8	8					5827921	17680268	6200897							0.0224096	0.283099	0.990521	0.00134188						unit 7	0.210933	0.115894			6999.75	2935.61		10	10				969862	2.46956e+06	432848						0.0161609	0.253178
128.919	5646.63		9	9					980564	7296578	995300							0.023119	0.532373	0.992041	0.0697517						unit 8	0.23933	0.0947949			7171.01	4617.76		11	11				83656.7	2.14038e+06	40850.3						0.0157872	0.49128
74.5984	6116.73		9	10					926645	9818319	973581							0.0237049	0.589342	0.99297	0.0109617						unit 9	0.210062	0.0874838			4863.19	1713.69		12	12				220703	1.14953e+06	296112						0.0164487	0.28485
167.822	5105.14		10	10																							unit 10	0.250169	0.0901257			4426.84	3071.26		13	13				386008	2.11553e+06	262688						0.017201	0.321085
60.0842	3065.23		9	11																							unit 11	0.319073	0.124714			1992.3	2923.55		14	14				490913	3.15923e+06	1.06121e+06						0.016379	0.293341
46.2344	8903.05		12	12																							unit 12	0.263119	0.111128			2977.45	1267.85		12	13				1.9324e+06	3.22822e+06	1.47434e+06						0.0154024	0.324583
31.4193	10441.5		14	13																							unit 13	0.290295	0.114473			2335.08	601.537		11	11				1.14486e+06	2.90534e+06	653267						0.0160347	0.366488
52.2635	15570.5		13	13					Table Analyzed	CB vs Move								Table Analyzed	Chirp DCN_Stim Time vs Freq domain (Shuffled)								unit 14	0.267352	0.121012			2389.29	196.726		10	10
140.5	12721.6		15	14																							unit 15	0.25132	0.112768			2417.06	187.033		9	9
55.5997	8248.94		17	14					Friedman test									Friedman test									unit 16	0.256148	0.102351			1366.96	257.326		8	8
73.6174	13941.2		14	15					P value	0.0011								P value	<0.0001								unit 17	0.272613	0.118003			1573.46	25.0747		10	10
39.1673	23158.8		17	16					Exact or approximate P value?	Exact								Exact or approximate P value?	Approximate								unit 18	0.148135	0.0767017			867.927	207.295		12	12
177.742	5781.58		16	16					P value summary	**								P value summary	****								unit 19	0.194033	0.102843			703.564	476.103		13	13
182.327	1997.43		17	17					Are means signif. different? (P < 0.05)	Yes								Are means signif. different? (P < 0.05)	Yes								unit 20	0.378291	0.166395			1176.32	257.472		15	15				Table Analyzed	Motion x CB Xcorr mean							Table Analyzed	Complex Chirp DCN_Stim Time vs Freq domain (Shuffled)
554.398	2846.9		18	18					Number of groups	3								Number of groups	4								unit 21	0.366366	0.139109			1865.92	167.736		17	17
643.748	651.648		19	19					Friedman statistic	12								Friedman statistic	22.2								unit 22	0.346485	0.130781			6345.29	178.036		19	19				Friedman test								Friedman test
579.422	1963.33		19	19																							unit 23	0.309392	0.118288			9308.4	237.429		20	21				P value	0.0001							P value	<0.0001
685.245	4776.62		20	20					Data summary									Data summary									unit 24	0.36768	0.144381			8340.72	1023.18		22	22				Exact or approximate P value?	Approximate							Exact or approximate P value?	Approximate
883.908	842.45		21	21					Number of treatments (columns)	3								Number of treatments (columns)	4								unit 25	0.312249	0.138914			6177.77	748.53		24	24				P value summary	***							P value summary	****
262.508	7149.04		22	22					Number of subjects (rows)	8								Number of subjects (rows)	8								unit 26	0.249456	0.145658			7884.07	1791.7		25	25				Are means signif. different? (P < 0.05)	Yes							Are means signif. different? (P < 0.05)	Yes
547.109	11890.4		22	22																							unit 27	0.0614672	0.0822438			8002.48	546.94		24	24				Number of groups	3							Number of groups	4
444.151	9969.95		23	23																							unit 28	0.186954	0.117587			8681.35	680.797		23	23				Friedman statistic	18.17							Friedman statistic	32.4
475.414	4195.12		24	24																							unit 29	0.077987	0.0843717			8790.86	1014.64		22	22
896.264	5533.22		24	24					Multiple comparison									Multiple comparison									unit 30	0.0733834	0.0655672			9363.83	2919.86		21	21				Data summary								Data summary
33.5353	432.722		4	5					Number of families	1								Number of families	1								unit 31	0.167056	0.108862			3811.81	1612.84		20	21				Number of treatments (columns)	3							Number of treatments (columns)	4
125.383	304.858		5	5					Number of comparisons per family	3								Number of comparisons per family	6								unit 32	0.208333	0.115147			8344.64	234.972		20	20				Number of subjects (rows)	12							Number of subjects (rows)	12
129.335	752.429		5	6					Alpha	0.05								Alpha	0.05								unit 33	0.448091	0.182738			10313.9	646.121		20	20
41.4317	1145.51		7	6																							unit 34	0.215984	0.138984			11192.4	1551.35		20	20
191.151	4581		7	7					Dunn's multiple comparisons test	Rank sum diff.	Significant?	Summary	Adjusted P Value					Dunn's multiple comparisons test	Rank sum diff.	Significant?	Summary	Adjusted P Value					unit 35	0.555882	0.22376			11164.8	100.941		20	20
153.388	3851.48		8	8					Baseline vs. Light on	-12	Yes	**	0.0081	A-B				Shuffled vs. Motion	-14	Yes	*	0.0402	A-B				unit 36	0.204084	0.132365			10147.8	2460.44		20	20				Multiple comparison								Multiple comparison
41.4267	1803.9		8	8					Baseline vs. Light off	0	No	ns	>0.9999	A-C				Shuffled vs. Frequency Peak	-22	Yes	***	0.0001	A-C				unit 37	0.381572	0.154491			9939.05	1544.68		19	19				Multiple comparison								Number of families	1
110.022	2537.79		9	9					Light on vs. Light off	12	Yes	**	0.0081	B-C				Shuffled vs. Amplitude Peak	-4	No	ns	>0.9999	A-D				unit 38	0.290663	0.15735			5397.68	405.736		18	18				Number of families	1							Number of comparisons per family	6
235.649	3795.51		10	10														Motion vs. Frequency Peak	-8	No	ns	0.728	B-C				unit 39	0.257986	0.131341			2216.76	404.321		17	17				Number of comparisons per family	3							Alpha	0.05
17.6698	8444.66		11	11					Test details	Rank sum 1	Rank sum 2	Rank sum diff.	n1	n2				Motion vs. Amplitude Peak	10	No	ns	0.3168	B-D				unit 40	0.389211	0.177319			753.063	1220.09		16	16				Alpha	0.05
80.6603	7295.25		11	11					Baseline vs. Light on	12	24	-12	8	8				Frequency Peak vs. Amplitude Peak	18	Yes	**	0.0029	C-D				unit 41	0.589458	0.254419			461.093	1365.23		15	15												Dunn's multiple comparisons test	Rank sum diff.
218.53	5379.91		12	12					Baseline vs. Light off	12	12	0	8	8													unit 42	0.190298	0.111357			378.524	299.734		14	14				Dunn's multiple comparisons test	Rank sum diff.	Significant?	Summary	Adjusted P Value				Baseline vs. Motion	-18
221.284	12622.9		13	13					Light on vs. Light off	24	12	12	8	8				Test details	Rank sum 1	Rank sum 2	Rank sum diff.	n1	n2				unit 43	0.101378	0.0922217			309.235	25.5476		13	14				Baseline vs. Light on	-17	Yes	**	0.0016	A-B			Baseline vs. Frequency Peak	-30
346.356	7462.45		13	13														Shuffled vs. Motion	10	24	-14	8	8				unit 44	0.241029	0.117283			1608.79	707.808		12	12				Baseline vs. Light off	2	No	ns	>0.9999	A-C			Baseline vs. Amplitude Peak	0
631.309	8660.98		14	14														Shuffled vs. Frequency Peak	10	32	-22	8	8				unit 45	0.267306	0.123892			1564.34	370.675		11	11				Light on vs. Light off	19	Yes	***	0.0003	B-C			Motion vs. Frequency Peak	-12
585.086	8606.02		15	15														Shuffled vs. Amplitude Peak	10	14	-4	8	8				unit 46	0.225751	0.128084			867.133	33.1524		10	10												Motion vs. Amplitude Peak	18
119.916	9738.51		16	16														Motion vs. Frequency Peak	24	32	-8	8	8				unit 47	0.380704	0.238827			848.189	33.1644		10	10				Test details	Rank sum 1	Rank sum 2	Rank sum diff.	n1	n2			Frequency Peak vs. Amplitude Peak	30
329.673	3724		16	16														Motion vs. Amplitude Peak	24	14	10	8	8				unit 48	0.213739	0.130807			633.665	22.9163		10	10				Baseline vs. Light on	19	36	-17	12	12
338.232	5786.84		17	17														Frequency Peak vs. Amplitude Peak	32	14	18	8	8				unit 49	0.330459	0.294014			1137.51	57.443		10	10				Baseline vs. Light off	19	17	2	12	12			Test details	Rank sum 1
453.038	7048.7		18	18																							unit 50	0.193269	0.0986554			629.318	31.3869		10	10				Light on vs. Light off	36	17	19	12	12			Baseline vs. Motion	18
733.32	6539.67		18	18																							unit 51	0.238949	0.121264			601.921	59.0931		10	10												Baseline vs. Frequency Peak	18
335.158	18559.1		19	19																							unit 52	0.421096	0.210833			88.2762	78.2039		9	9												Baseline vs. Amplitude Peak	18
516.114	15413.6		20	20																							unit 53	0.526033	0.215439			72.2885	80.2643		9	9												Motion vs. Frequency Peak	36
1229.55	3818.24		20	20																							unit 54	0.406619	0.149775			31.9441	95.5659		8	8												Motion vs. Amplitude Peak	36
689.268	4717.25		21	21																							unit 55	0.516717	0.215652			97.1424	163.553		6	8												Frequency Peak vs. Amplitude Peak	48
795.28	8350.3		22	22																							unit 56	0.355813	0.139568			154.059	105.04		7	7
528.429	4919.41		23	23																							unit 57	0.516841	0.199931			242.128	248.732		2	6
928.093	16339		23	23																							unit 58	0.322981	0.136294			1220.55	780.972		6	6
844.231	6242.96		24	24																							unit 59	0.317469	0.128977			1011.75	82.2608		5	5
915.696	6229.76		25	25																							unit 60	0.492106	0.199427			192.802	164.574		4	5
2288.15	7487.61		4	5																							unit 61	0.106043	0.1075			187.329	412.979		5	5
3196.36	2093.6		5	5																							unit 62	0.0918064	0.108118			244.522	1662.85		6	7
1627.14	533.738		5	5																							unit 63	0.237722	0.146479			587.371	139.646		8	7
1342.81	353.185		6	6																							unit 64	0.0452858	0.0809065			709.098	380.244		8	4
1077.58	890.552		7	7																							unit 65	0.245256	0.128584			1940.78	145.686		9	10
1753.94	368.991		8	8																							unit 66	0.185194	0.117223			3282.77	683.261		10	10
3178.3	414.295		8	9																							unit 67	0.0915923	0.0770902			3416.83	1628.46		11	12
6277.03	349.881		9	10																							unit 68	0.0629342	0.0863089			4322.31	907.361		13	11
9136.08	112.481		10	10																							unit 69	0.0207891	0.0726387			3414.12	846.121		13	14
7840.12	354.381		10	10																							unit 70	0.684817	0.284762			4622.99	1631.8		13	13
12756.1	1080.18		11	11																							unit 71	0.122522	0.103939			6876.11	825.994		12	12
11299.3	3704.39		12	12																							unit 72	0.37903	0.167446			4708.3	2025.66		11	11
5381.8	7294.12		13	13																							unit 73	0.104579	0.115089			4587.21	3711.65		10	9
7844.53	10645.4		13	13																							unit 74	0.128493	0.115208			1865.97	744.048		8	8
7916.4	29774.8		14	14																							unit 75	0.320409	0.144713			3140.58	477.913		9	8
4532.68	25851.8		15	15																							unit 76	0.331366	0.175054			3174.34	2086.19		10	10
6475.45	10578.2		15	15																							unit 77	0.216242	0.141664			5396.68	524.764		12	13
6257.49	23269.6		16	16																							unit 78	0.389209	0.197415			6777.81	1069.58		14	13
4560.68	86263		17	17																							unit 79	0.190322	0.12374			3251.76	4927.81		16	16
3723.41	51770		17	17																							unit 80	0.249264	0.141313			5586.46	3709.75		17	17
2417.68	82607.9		18	18																							unit 81	0.144622	0.125591			3883.18	4327.43		19	19
3715.36	40389.7		19	19																							unit 82	0.312556	0.181002			2505.3	1639.09		21	21
916.865	16930.2		19	19																							unit 83	0.216981	0.165721			1983.11	621.426		22	22
1463.56	35404.7		20	20																							unit 84	0.372672	0.189325			469.516	2044.34		24	24
377.864	20068		21	21																							unit 85	0.141089	0.111545			621.314	2177.55		25	24
438.484	17487.3		22	22																							unit 86	0.366325	0.159926			1085.88	1659.99		24	24
547.134	29463.5		22	22																							unit 87	0.153538	0.107007			572.528	9277.15		22	23
347.518	40444.5		23	23																							unit 88	0.342575	0.148674			641.124	3853.03		21	23
551.642	50671.5		24	24																							unit 89	0.0393711	0.0729011			1846.93	3812.96		20	20
271.58	39847.2		25	24																							unit 90	0.156547	0.111648			2439.33	4562.43		20	20
1335.07	1450.74		5	4																							unit 91	0.252799	0.155187			1563.66	3430.54		20	19
1499.31	1767.88		5	5																							unit 92	0.449639	0.190908			5481.84	1137.37		20	20
2483.24	570.255		6	6																							unit 93	0.336618	0.2129			5363.83	376.658		20	20
1284.91	70.5811		7	6																							unit 94	0.380705	0.225808			5133.57	1073.25		20	20
1521.35	61.1426		7	7																							unit 95	0.552278	0.238133			1483.78	3635.78		19	19
2959.64	146.807		8	8																							unit 96	0.345675	0.176928			3038.14	4504.93		19	19
3204.56	373.233		9	9																							unit 97	0.207106	0.141155			2118.09	4162.87		18	18
1705.19	1919.03		9	9																							unit 98	0.307672	0.17585			6873.76	3125.09		17	16
3387.3	2266.03		10	10																							unit 99	0.317137	0.210461			3606.08	1275.34		16	16
6797.6	1836.01		11	10																							unit 100	0.285767	0.220505			6742.17	13576		15	15
7487.93	924.017		12	11																							unit 101	0.301254	0.200494			4962.21	1683.04		14	14
12341.1	1433.62		12	12																							unit 102	0.250457	0.147178			7220.01	154.573		13	14
12676	531.689		13	13																							unit 103	0.0757921	0.101134			4349.35	142.301		12	13
8238.24	3718.77		14	14																							unit 104	0.0615371	0.0540761			4071.64	697.259		11	11
8727.51	3350.03		14	14																							unit 105	0.0774833	0.0668454			3747.82	584.627		10	10
10408.1	434.488		15	15																							unit 106	0.25348	0.127277			5138.99	311.604		10	10
10209.2	185.024		16	16																							unit 107	0.455658	0.193846			4987.8	978.625		10	10
9039.42	374.954		16	17																							unit 108	0.130858	0.0848025			3566.71	562.157		10	10
9376.68	560.233		17	17																							unit 109	0.347672	0.140025			4222.85	413.969		10	10
9607.81	881.953		18	18																							unit 110	0.510119	0.194363			2183.04	388.713		10	10
3338.39	3611.53		19	19																							unit 111	0.350188	0.138401			3007.53	78.7223		9	9
3759.7	44291.7		19	19																							unit 112	0.512028	0.202362			1735.71	455.124		9	19
4855.35	41003		20	20																							unit 113	0.255028	0.131287			2590.54	241.153		8	8
3229.97	31948.2		21	21																							unit 114	0.344191	0.145949			2107.22	49.7964		7	7
2183.41	29288.5		21	21																							unit 115	0.20042	0.108594			1430.03	304.916		7	14
2719.74	57512.2		22	22																							unit 116	0.0627174	0.0686902			570.749	189.602		6	6
1045.9	45494.7		23	23																							unit 117	0.334905	0.141313			345.142	889.625		6	11
683.949	37360.7		23	23																							unit 118	0.21918	0.113536			606.598	111.431		5	10
298.209	82852.3		24	24																							unit 119	0.138354	0.0873449			76.5388	221.909		5	4
2579.82	3692.74		4	9																							unit 120	0.271185	0.122466			809.919	283.547		5	8
11989.4	244.935		7	4																							unit 121	0.369404	0.149331			5569.24	1473.61		7	7
24483.9	784.966		10	5																							unit 122	0.18718	0.107482			25503.9	2670.63		8	8
11482.4	403.312		5	7																							unit 123	0.398015	0.220312			27823.2	1903.52		9	9
5723.33	2031.99		8	7																							unit 124	0.245046	0.113953			30493.2	687.539		10	10
16870	1669.6		7	7																							unit 125	0.437403	0.170202			26057.2	219.718		11	10
28387.6	427.211		10	8																							unit 126	0.34728	0.136202			27456	1036.83		12	12
17666.1	1300.28		10	9																							unit 127	0.444802	0.181401			24758.6	1193.22		13	13
32085.1	115.851		9	12																							unit 128	0.391483	0.158586			23574.1	1023.04		14	13
10054.1	1433.56		9	10																							unit 129	0.409345	0.188266			25796.3	263.935		13	13
20049.9	427.823		11	11																							unit 130	0.306923	0.132225			33388.6	798.273		12	12
17473.6	3374.35		13	11																							unit 131	0.36125	0.163668			27587.9	3003.72		11	11
10349.9	3630.94		12	12																							unit 132	0.32708	0.141962			17186.5	3671.72		10	10
8193.48	3196.39		13	13																							unit 133	0.390398	0.18269			11339.2	1135.25		8	9
7194.22	4968.3		15	14																							unit 134	0.0789574	0.0802856			14209.4	1539.48		9	9
33253.3	1575.43		15	14																							unit 135	0.219736	0.0942095			16126.9	1635.55		11	11
28393.4	1184.76		15	15																							unit 136	0.407854	0.170992			11770.7	3354.08		12	12
14366.1	11670.1		16	16																												15166.2	1568.72		14	14
9552.77	2536.48		17	17																												13929.6	1419.66		16	16
12392.5	4745.09		17	17																												5791.96	1085.15		17	17
34216.1	5202.75		18	18																												1182.06	2868.5		19	19
26612.5	6736.56		19	19																							Column B	Shuffled				66.8738	5991.7		21	21
40466.4	2896.87		19	19																							vs.	vs.				540.387	8143.07		23	23
40895.7	13765.5		20	20																							Column A	Original				841.843	6008.69		24	24
29458.6	14613.4		21	21																												1079.48	4927.86		24	24
21613.2	12198		21	21																							Wilcoxon matched-pairs signed rank test					941.006	6026.18		23	23
37651.9	28844.7		22	22																							P value	<0.0001				1062.22	8265.54		22	22
28157.5	32338.2		23	23																							Exact or approximate P value?	Exact				975.753	8747.56		21	21
25847.8	18067.5		24	24																							P value summary	****				1376.51	6377.13		20	20
27509.2	13015.9		24	24																							Significantly different (P < 0.05)?	Yes				1618.15	7316.97		20	20
5161.79	461.198		3	4																							One- or two-tailed P value?	Two-tailed				1704.88	7500.62		20	20
4574.19	412.58		6	5																							Sum of positive, negative ranks	149.0 , -9167				1944.11	7609.82		20	20
10912.5	308.488		6	5																							Sum of signed ranks (W)	-9018				3124.48	6018.06		20	20
9591.66	804.61		6	6																							Number of pairs	136				2657.14	6580.61		20	20
13600.2	725.581		5	7																							Number of ties (ignored)	0				2993.76	3404.92		19	19
8971.85	466.378		8	8																												3462.74	2859.18		18	19
3440.73	1340.22		8	8																							Median of differences					4456.52	2062.46		17	17
25630	345.581		9	9																							Median	-0.1313				4306.49	1982.34		16	16
11149.9	316.045		10	10																												6360.22	1193.28		15	16
23500.3	178.09		10	11																							How effective was the pairing?					5855	1234.26		14	14
7903.72	4403.25		11	11																							rs (Spearman)	0.8659				6625.41	2266.16		13	13
12464.2	301.405		12	12																							P value (one tailed)	<0.0001				6988.6	3046.94		12	12
10372.4	1500.1		12	12																							P value summary	****				5846.05	4911.17		11	11
14619.2	3163.67		13	13																							Was the pairing significantly effective?	Yes				3679.85	5259.99		10	10
19556.6	8813.73		13	14																												4249.8	6429.61		10	10
4120.62	7545.06		14	14																												4587.86	5979.47		10	10
4948.94	24279.5		15	15																												6357.1	6006.83		10	10
7247.43	14685.7		16	16																												3895.29	5621.09		10	10
16095.4	9455.73		17	17																												4921.49	4729.03		10	10
17319.5	20951		18	18																												3338.61	4541.56		10	10
9367.61	10396.3		18	18																												2376.31	5477.02		9	9
35170.9	2993.04		19	19																												1598.97	4025.99		8	8
17304.1	3383.18		20	19																												1483.18	4321.15		8	8
10587.3	9126.29		20	20																												1669.74	3983.74		7	7
19915.2	13447.3		21	21																												1314.52	2231.39		7	7
32955.7	3876.56		21	21																												1331.83	1916.13		6	6
32749.9	6966.84		22	22																												971.259	1084.31		5	6
31225.9	9855.94		23	23																												1988.1	108.862		5	5
15147.8	4227.15		24	24																												185.298	61.7113		4	5
7968.41	11090.9		24	25																												79.0659	44.2809		6	6
25.6672	1500.72		5	8																												688.824	98.3022		7	7
179.524	778.492		5	5																												720.005	111.695		7	8
355.581	692.777		6	6																												921.266	82.7504		9	9
370.08	721.148		6	6																												1551.65	172.053		10	9
1339.78	757.711		7	7																												3287.32	39.8059		11	10
1816.52	4404.79		8	8																												6855.15	1859.25		12	12
1351.34	1478.02		8	9																												7500.43	1102.44		13	13
1292.77	1040.09		9	9																												5897.61	2269.32		14	13
1546.2	2561.18		10	10																												5145.57	1322.69		13	13
1186.04	2846.17		11	11																												7217.56	2465.73		12	12
1301.96	1472.88		11	11																												5918.8	4611.88		11	11
1138.17	1568.26		12	12																												3948.46	1810.08		10	10
1117.57	6203.93		13	13																												1817.24	723.035		9	8
932.415	7588.97		13	13																												1305.72	919.698		9	9
1551.66	17205.8		14	14																												2322.35	739.331		11	11
2487.85	18715.4		15	15																												2469.32	687.519		12	13
2116.97	10341.1		16	16																												3317.26	138.368		14	13
3164.13	9382		16	16																												7272.54	798.101		16	16
3262.79	34879.2		17	17																												7837.08	659.42		18	17
2373.22	30356.8		18	18																												8745.49	1553.97		19	19
1518.57	47258.5		18	18																												10244.2	5026.84		21	21
2044.94	42537.7		19	19																												5318.88	370.459		23	22
1813.02	24730.1		20	20																												3050.9	1522.96		24	24
1349.23	24048.6		20	20																												3385.1	114.365		24	25
498.305	56279.8		21	21																												4009.3	678.252		23	23
372.971	75825.9		22	22																												4574.27	269.987		22	22
218.315	62910.5		23	23																												5747.9	78.2038		21	22
215.021	82511.1		23	23																												5864.33	221.763		20	20
99.3844	69367.4		24	24																												10469.5	755.281		20	20
76.7278	58863.6		25	25																												9611.44	1634.91		20	20
74.3357	1617.76		5	7																												9278.27	1286.86		20	20
127.322	1679.29		5	5																												8453.08	1181.61		20	20
394.416	2486.01		6	6																												8381.85	2742.25		20	20
695.401	3560.22		6	7																												8402.76	442.643		19	19
1538.24	2247.6		7	7																												10005.1	2506.14		18	18
1645.13	1497.1		8	8																												9173.6	2135.32		17	17
2202.44	482.247		8	8																												8049.11	753.856		16	16
2608.33	1006.1		9	9																												6030.08	113.014		15	16
1579.15	919.439		10	10																												3371.78	1844.98		14	14
1700.98	1455.81		10	10																												2461.85	1257.77		13	14
2146.9	3409.5		11	11																												1921.73	2532.89		12	12
2056.51	1865.04		12	12																												886.831	967.692		11	11
1180.48	16686.4		13	12																												1599.09	711.468		10	10
1142.8	46241.9		13	14																												2399.81	871.07		10	10
1328.7	49590.5		14	14																												1856.34	4059.81		10	10
1631.24	79890.7		15	15																												837.219	891.605		10	10
1389.94	88226.2		15	15																												1494.19	1951.75		10	10
1558.08	52560.3		16	16																												683.335	429.163		10	10
2272.63	50715.5		17	17																												522.838	835.246		10	10
2300.06	54531.4		18	17																												1092.82	340.515		10	9
2216.96	73775.7		18	18																												258.035	1239.44		9	8
2461.99	78986.9		19	19																												552.623	2011.54		8	8
1438.68	56994.3		20	20																												848.404	172.735		7	8
1290.94	77462.6		20	20																												117.531	514.128		7	7
923.618	65070.3		21	21																												69.9934	1898.76		7	6
521.833	52740.5		22	22																												212.078	492.435		5	6
218.585	48486.8		22	22																												54.2692	216.163		6	6
153.714	45498.4		23	23																												578.66	44.7448		4	5
259.51	23592.8		24	24																												267.657	48.3817		5	6
15.6684	30169.7		26	25																												366.412	43.6082		7	7
																																465.129	45.231		7	8
																																773.109	104.988		9	9
																																1601.89	250.789		10	10
																																1069.2	230.638		11	11
																																1108.79	865.862		12	12
																																3475.69	1238.76		13	13
																																4394.52	387.99		14	13
																																2925.21	28.8228		13	14
																																1740.72	304.518		12	12
																																1650.65	447.895		11	11
																																381.858	246.962		10	10
																																123.735	357.552		9	9
																																111.835	840.923		11	9
																																528.628	582.179		11	11
																																279.79	622.758		13	13
																																415.855	1005.08		14	14
																																367.224	2849.86		15	16
																																2041.49	555.706		18	18
																																1119.46	2439.48		19	19
																																2024.51	818.209		21	21
																																421.176	60.7063		23	23
																																333.802	598.801		25	24
																																239.574	576.92		24	24
																																1614.95	1116.72		23	23
																																266.951	2096.25		22	22
																																1405.55	1121.46		21	21
																																1145.41	664.18		20	20
																																1883.32	1249.61		20	20
																																2258.4	616.797		20	20
																																1719.61	1198		20	20
																																2919.77	1141.21		20	20
																																2804.35	96.2557		20	19
																																1875.67	243.11		19	19
																																972.293	1058.46		18	18
																																488.308	2954.79		17	17
																																456.783	1741.68		16	16
																																875.264	2662.92		15	15
																																593.637	1459.53		14	14
																																556.154	738.469		13	13
																																850.177	263.952		12	12
																																266.929	1009.86		10	11
																																704.058	379.315		11	10
																																156.211	608.352		8	10
																																480.927	2089.44		9	10
																																231.357	530.085		11	10
																																256.072	1636.17		10	10
																																397.061	627.409		10	10
																																377.093	501.587		10	9
																																715.304	583.137		9	9
																																579.845	411.281		8	9
																																984.89	559.01		8	8
																																168.164	79.2151		6	7
																																293.449	50.1375		5	7
																																38.6614	73.1864		7	6
																																705.328	56.9479		1	5
																																63.5734	157.56		5	5
																																378.143	57.4446		5	5
																																54.0925	260.286		5	7
																																130.493	527.887		6	7
																																849.321	372.164		7	7
																																936.679	438.365		8	8
																																1738.81	247.229		9	9
																																455.491	2111.63		10	10
																																1023.59	325.835		11	11
																																1262.91	1939.52		12	12
																																510.957	775.438		13	13
																																1886.34	1141.93		14	14
																																1390.62	669.3		13	13
																																1801.75	989.035		12	11
																																2617.38	819.819		10	10
																																1112.34	2635.32		9	9
																																740.352	1877.82		8	8
																																1275.23	1403.07		10	10
																																1438.89	478.72		11	12
																																1708.4	287.816		13	14
																																2074.42	629.609		15	15
																																2647.47	369.901		17	17
																																1239.64	951.456		19	18
																																1505.41	544.1		20	20
																																756.94	506.507		22	22
																																1180.54	1742.81		23	23
																																382.445	1413.74		24	25
																																708.707	356.874		24	24
																																112.9	1138.19		24	23
																																541.103	729.091		22	23
																																1213.79	208.036		21	19
																																639.418	517.052		20	21
																																977.892	2441.3		20	20
																																1155.24	2929.97		20	20
																																496.729	3231.74		20	20
																																178.519	2719.89		20	20
																																289.935	4318.7		20	20
																																896.983	2486.44		19	19
																																1661.11	1930.38		18	18
																																823.907	3492.04		17	17
																																877.766	2822.14		16	16
																																969.004	7027.23		14	15
																																2243.71	2234.29		14	14
																																432.928	5978.48		13	13
																																325.737	3903.86		11	12
																																883.354	4744.35		11	11
																																678.763	1820.12		10	10
																																2479.47	3847.91		10	10
																																1543.69	1702.21		10	10
																																611.095	2539.34		10	10
																																494.715	910.122		10	10
																																1188.78	152.577		10	9
																																884.815	112.534		9	9
																																610.901	232.325		9	9
																																920.971	435.389		8	8
																																297.873	388.746		8	8
																																228.172	693.253		7	7
																																184.453	70.4541		6	6
																																195.835	77.7251		5	6
																																405.65	100.226		5	5
																																404.202	40.8141		5	5
																																32.4888	23.1849		5	5
																																559.639	16.0874		7	6
																																646.711	14.8935		8	7
																																582.964	32.0512		9	8
																																999.362	71.1487		10	9
																																953.381	191.987		10	10
																																3330.48	364.504		11	11
																																3123.47	337.382		12	12
																																2588.5	751.354		13	13
																																2720.71	1140.03		13	14
																																2320.48	259.571		12	12
																																2052.73	242.975		11	11
																																1106.32	17.3866		10	10
																																1455.97	11.1748		9	9
																																137.136	86.6233		8	9
																																2676.91	197.859		10	11
																																2384.9	1311.91		12	12
																																2315.21	119.925		14	14
																																4207.51	4632.58		15	15
																																5121.72	418.306		17	17
																																4964.27	326.611		19	19
																																4360.28	366.402		21	21
																																3474.62	813.874		22	22
																																2288.06	307.943		24	24
																																2873.49	373.704		25	25
																																2482.41	341.283		24	24
																																3917.15	415.567		23	23
																																3167.92	1386.54		21	22
																																3478.68	1138.59		20	21
																																5236.14	992.99		20	20
																																5978.24	937.929		20	20
																																6969.64	899.675		20	20
																																6873.5	777.494		20	20
																																3922.48	1816.36		20	20
																																3421.44	1064.62		20	20
																																3899.18	1042.92		19	19
																																2444.67	1157.63		17	18
																																2845.53	971.636		17	17
																																3202.32	1258.98		16	16
																																1803.52	416.429		15	15
																																1716.65	493.706		14	13
																																1405.27	954.712		13	13
																																996.587	375.638		12	12
																																763.055	291.723		11	10
																																643.316	93.976		10	10
																																393.098	63.6794		10	10
																																357.793	85.8291		10	10
																																165.423	110.014		10	10
																																263.248	141.404		11	10
																																433.335	76.1809		9	10
																																308.2	33.7817		8	9
																																149.33	57.943		7	9
																																89.7024	29.4753		10	8
																																327.866	15.9361		7	7
																																89.828	13.8511		8	6
																																102.012	8.14002		6	6
																																738.56	8.70637		4	5
																																1688.53	22.0932		3	5
																																365.334	75.0086		5	6
																																291.62	47.6268		6	7
																																216.388	177.896		7	7
																																1046.47	1069.15		7	6
																																948.687	7.99822		9	8
																																1340.21	329.045		10	10
																																1994.01	834.842		11	11
																																352.004	1144.45		11	12
																																332.346	1475.07		13	13
																																945.397	647.334		14	14
																																326.755	670.188		13	13
																																150.468	588.069		12	12
																																237.927	30.6298		11	11
																																548.657	45.3688		9	9
																																255.361	144.688		6	8
																																416.094	307.331		10	9
																																1189.71	377.311		11	11
																																1176.99	784.839		13	13
																																918.796	208.279		14	14
																																447.455	136.473		16	16
																																721.97	130.18		18	18
																																903.036	108.34		19	20
																																1153.7	171.199		21	21
																																612.055	204.538		23	23
																																217.55	223.066		25	24
																																1483.69	3637.67		24	24
																																2545.59	104.529		23	23
																																721.586	169.021		22	23
																																220.936	35.109		19	20
																																330.458	324.235		20	20
																																1161.13	3536		20	20
																																1408.79	3.63882		20	23
																																1089.09	15.3488		20	20
																																163.3	114.091		21	20
																																477.777	485.537		21	20
																																1277.96	4803.92		19	19
																																317.738	1226.2		18	19
																																1614.07	323.056		17	17
																																220.053	823.368		14	16
																																433.608	4.47157		15	15
																																374.531	13.7521		16	14
																																76.6318	5.57827		12	13
																																427.03	30.6976		12	13
																																273.848	838.469		13	11
																																566.919	318.716		10	10
																																234.586	78.2234		10	10
																																134.068	58.0085		11	10
																																355.275	3.44994		10	14
																																200.717	1.2111		10	8
																																129.886	32.6575		10	10
																																111.576	504.839		13	10
																																309.461	11.4218		9	9
																																694.842	73.0948		7	9
																																339.247	83.3153		8	9
																																59.3603	69.798		7	7
																																227.421	5.70591		6	6
																																100.808	2.85637		6	6
																																609.713	6.33405		5	5
																																103.922	6.80481		5	6
																																181.117	72.4743		5	5
																																450.753	67.6406		5	5
																																498.093	473.363		6	6
																																181.586	243.026		6	8
																																186.713	2247.52		8	8
																																111.132	2877.58		9	9
																																368.463	2370.1		10	10
																																142.297	1781.63		11	11
																																144.58	1473.64		13	12
																																174.998	8916.62		14	13
																																982.565	7323.58		14	14
																																285.797	10272.4		13	13
																																97.9081	2410.5		11	12
																																109.539	6761.67		10	11
																																498.358	3923.8		9	9
																																48.9533	2333.92		6	8
																																320.828	2256.39		10	10
																																180.648	1277.01		12	11
																																155.629	5407.58		13	13
																																488.036	1013.3		15	15
																																225.941	6672.73		17	16
																																40.6263	5468.76		19	18
																																616.773	209.98		20	20
																																391.868	5306.43		21	21
																																653.546	4148.94		23	23
																																344.307	1618.39		25	24
																																610.925	509.474		24	24
																																469.981	1065		23	23
																																606.758	680.993		22	22
																																841.092	1586.51		21	21
																																435.256	431.75		21	21
																																1001.43	4822.92		20	20
																																592.192	4406.67		20	20
																																2002.58	4949.02		20	20
																																1271.02	813.637		20	21
																																543.889	3228.4		20	20
																																718.919	4350.74		19	19
																																829.085	2152.92		18	18
																																1415.83	2076.15		17	17
																																82.0327	963.516		16	16
																																114.801	454.965		15	15
																																68.4605	1188.14		14	14
																																42.9196	1941.01		14	13
																																96.0195	279.183		12	12
																																64.282	183.461		9	11
																																45.2243	2348.72		10	10
																																174.934	3522.44		12	10
																																95.0303	3924.73		9	10
																																76.8857	5742.05		9	10
																																109.561	3831.96		12	10
																																172.811	3635.35		11	10
																																205.656	1555.65		10	9
																																243.673	4098.35		8	9
																																127.866	2452.88		8	8
																																125.787	2419.29		8	8
																																202.547	1877.15		7	7
																																183.893	340.501		6	6
																																223.339	118.659		6	6
																																428.094	39.633		6	5
																																146.006	5.6722		5	5
																																281.078	590.582		4	7
																																839.168	1007.26		5	5
																																497.308	890.839		6	6
																																109.198	1364.72		6	9
																																240.249	1968.88		8	8
																																115.54	19010.7		10	9
																																732.975	20730.9		10	10
																																634.404	4006.31		11	11
																																379.289	5744.14		12	12
																																1312.47	4468.06		13	13
																																101.669	7447.71		14	14
																																1072.1	9094.45		13	13
																																769.573	4164.93		12	12
																																199.481	4156.38		11	11
																																152.776	2804.7		7	9
																																117.891	2634.11		9	8
																																83.8928	6884.69		10	9
																																2662.77	6986.71		11	11
																																655.659	6010.55		12	13
																																74.9202	7577.6		13	15
																																316.622	6383.28		16	16
																																220.368	6316.23		18	18
																																393.346	2276.82		20	20
																																250.758	5582.77		21	22
																																701.846	6289.73		23	23
																																344.875	2285.25		25	25
																																265.152	116.415		24	24
																																405.958	721.034		23	23
																																601.893	2140.75		22	22
																																707.939	7639.33		21	21
																																614.523	1834.56		21	21
																																1336.32	6467.8		20	20
																																1422.47	7796.21		20	20
																																1463.96	5435.27		20	20
																																1090.65	5850.69		20	20
																																1052.91	5084.8		20	20
																																657.256	3651.25		19	19
																																168.648	810.22		18	18
																																311.258	1631.93		17	17
																																1026.91	6472.37		16	16
																																229.355	1000.03		15	15
																																1851.46	1636.28		14	14
																																1203.12	2689.61		13	13
																																1011.03	8877.55		13	12
																																767.84	10014.6		11	11
																																644.624	15197		10	10
																																334.719	6710.28		10	10
																																926.268	7633.42		10	10
																																315.43	2831.59		11	10
																																415.318	6857.23		10	10
																																132.65	7926.03		10	10
																																685.733	10871.8		9	10
																																86.8193	9034.35		8	9
																																522.975	7650.22		8	8
																																370.009	1483.09		8	8
																																733.043	1290.89		7	7
																																388.186	945.56		7	6
																																1226.17	1360.61		6	6
																																606.684	554.944		5	6
																																439.636	242.84		5	5
																																71.8724	132.019		5	5
																																43.5831	453.454		6	5
																																50.3471	300.021		3	8
																																654.925	1847.63		8	7
																																136.502	1567.49		9	9
																																562.597	1512.41		9	9
																																791.14	297.482		10	11
																																572.51	1419.4		11	12
																																1569.72	1282.76		13	12
																																1294.48	4924.79		13	14
																																1520.83	5599.72		14	14
																																880.755	3338.6		12	12
																																1249.61	510.767		11	11
																																317.572	1342.29		10	10
																																417.054	1298.67		10	10
																																379.757	2509.22		8	9
																																339.338	3944.7		10	11
																																1105.11	1804.84		12	12
																																1455.42	4789.93		14	14
																																1117.44	1996.85		16	16
																																961.208	2514.3		17	17
																																1449.78	2756.54		19	19
																																388.49	1762.15		21	20
																																146.236	2121.96		22	22
																																122.844	1025.73		25	24
																																320.121	2892.98		25	24
																																243.149	1426.43		23	23
																																219.53	1456.77		23	23
																																122.943	182.573		21	22
																																557.987	951.372		21	20
																																793.915	456.359		20	20
																																465.893	183.186		20	20
																																554.96	5376.23		20	20
																																1323.58	7509.73		20	20
																																765.594	9331.55		20	20
																																1066.49	4211.62		19	20
																																543.494	4924.89		19	19
																																1188.82	691.963		18	17
																																977.101	7767.75		17	17
																																1292.24	5573.56		16	16
																																1564.13	1346.23		14	14
																																753.933	9082.88		14	14
																																417.243	10963		13	13
																																437.442	3784.8		11	11
																																1048.54	310.161		10	10
																																100.324	2454.42		10	10
																																399.023	3548.18		10	10
																																1381.25	1194.67		10	10
																																845.483	869.313		10	10
																																592.265	3405.05		10	10
																																496.198	1230.47		10	10
																																272.224	7058.72		9	9
																																134.406	6161.33		9	9
																																204.021	3929.76		8	8
																																281.859	3209.28		7	8
																																110.024	432.824		9	7
																																153.765	385.449		7	6
																																190.454	556.781		4	5
																																134.227	161.191		4	4
																																32.9137	91.287		5	5
																																118.335	117.955		8	1
																																332.974	515.634		7	7
																																102.381	492.664		7	10
																																750.331	333.832		9	9
																																157.208	633.384		10	10
																																571.574	526.776		11	10
																																1638.16	266.794		12	12
																																1988.19	314.505		13	12
																																1787.12	290.266		14	13
																																1485.06	569.023		13	13
																																1052.84	581.753		12	11
																																554.505	327.397		11	11
																																284.843	2181.87		10	10
																																477.397	587.58		8	8
																																976.621	81.0257		9	9
																																1485.03	658.826		11	11
																																949.994	12.4217		13	14
																																1447.03	36.1227		14	18
																																537.792	2881.39		16	16
																																709.155	1911.84		17	18
																																700.769	1068.56		19	19
																																579.001	339.311		21	21
																																112.739	969.581		23	23
																																103.739	226.952		26	25
																																207.633	1180.18		24	24
																																738.08	954.566		23	22
																																2235.56	1936.99		22	23
																																1250.25	1935.56		21	21
																																668.236	4808.39		20	20
																																953.469	3400.2		20	20
																																517.864	2652.88		20	20
																																420.016	3334		20	20
																																333.472	3424.33		20	20
																																483.046	8539.6		20	20
																																1136.03	3912.99		19	19
																																1369.27	4835.09		18	18
																																669.476	4272.4		17	17
																																500.53	2076.37		17	16
																																1051.99	1356.69		15	16
																																845.82	848.747		14	14
																																1307.29	992.469		13	14
																																1995.95	636.75		13	12
																																737.697	2657.8		11	11
																																1002.12	794.109		10	10
																																593.863	287.131		10	10
																																365.933	489.369		10	10
																																368.755	616		10	10
																																544.273	493.144		10	10
																																825.499	2513.73		10	10
																																414.864	3841.47		10	9
																																418.259	2144.18		9	9
																																360.775	3526.68		8	9
																																138.165	2102.98		8	8
																																118.702	909.96		8	7
																																103.233	338.405		7	7
																																158.989	484.943		6	6
																																56.5446	365.154		3	5
																																30.0029	209.055		5	5
[truncated: 6 more columns]

## Sheet: Fig .7 F
Subject 1	EMG_Amp	0.916013	0.957466	1.00311	0.995779	0.92796	0.801918	0.725012	0.620481	0.650686	0.666899	0.6847	0.822606	0.887812	0.882206	0.945162	1.00196	1.0211	0.974489	0.872573	0.846675	0.78404	0.846164	0.8654	0.944391	0.984466	1.07327	1.08318	1.21968	1.26983	1.25953	1.20955	1.21627	1.12488	1.12614	1.09899	1.2773	1.47834	1.40956	1.53873	1.639	1.69016	1.89111	2.00203	2.2418	2.34238	2.47712	2.33082	2.2767
	CB_Amp	0.0105647	0.0124443	0.0112135	0.0160516	0.0139573	0.0156207	0.0191865	0.016362	0.0114038	0.0139728	0.0125993	0.0113537	0.0130882	0.0121751	0.0129131	0.0134542	0.0141096	0.0149846	0.0176488	0.0263547	0.0239862	0.0235941	0.024601	0.0243439	0.0223427	0.0237098	0.0253518	0.0211147	0.0231505	0.0190422	0.0189578	0.0212565	0.0310518	0.0257129	0.0338631	0.0284334	0.0243588	0.0296335	0.0286758	0.0270075	0.157228	0.176095	0.228003	0.239176	0.212381	0.257974	0.196304	0.216624
	EMG_freq	4	4	4	4	4	4	4	4	4	4	4	4	4	4	4	4	4	4	4	4	4	4	4	4	4	4	4	4	4	4	4	4	4	4	4	4	4	4	4	4	5	5	5	5	5	5	5	5
	CB_freq	4	4	4	4	4	4	4	4	4	4	4	4	4	4	4	4	4	4	4	4	4	4	4	4	4	4	4	4	4	4	4	4	4	4	4	4	4	4	4	4	5	5	5	5	5	5	5	5
Subject 2	EMG_Amp	0.153615	0.15845	0.164927	0.164236	0.168897	0.174175	0.171755	0.178369	0.198829	0.201605	0.198301	0.201582	0.204755	0.194728	0.185975	0.184227	0.183829	0.184704	0.188984	0.192893	0.194083	0.200587	0.208849	0.224181	0.244606	0.262557	0.280272	0.284852	0.28792	0.28894	0.283161	0.302201	0.293334	0.284915	0.273777	0.292181	0.297919	0.296842	0.297496	0.302289	0.293129	0.295198	0.291498	0.286075	0.286106	0.291875	0.308524	0.303051
	CB_Amp	0.0308166	0.027449	0.0294507	0.0267473	0.0255483	0.0318328	0.0378114	0.0383662	0.0260037	0.030178	0.048062	0.058169	0.0603421	0.038575	0.057786	0.0487397	0.0380032	0.0382002	0.0486025	0.045404	0.0287315	0.0353054	0.036056	0.0295474	0.0300871	0.0294357	0.035085	0.0478589	0.0482228	0.0428151	0.0408309	0.0463848	0.0451456	0.0368001	0.0387828	0.031097	0.037372	0.0408306	0.0282786	0.0342068	0.0256653	0.0305449	0.0649455	0.0879321	0.121679	0.108911	0.130731	0.141399
	EMG_freq	4	4	4	4	4	4	4	4	4	4	4	4	4	4	4	4	4	4	4	4	4	4	4	4	4	4	4	4	4	4	4	4	6	6	5	5	5	5	5	5	5	5	5	5	5	5	5	5
	CB_freq	4	4	4	4	4	4	4	4	4	4	4	4	4	4	4	4	4	4	4	4	4	4	4	4	4	4	4	4	4	4	4	4	6	6	5	5	5	5	5	5	5	5	5	5	5	5	5	5
Subject 3	EMG_Amp	0.23395	0.238196	0.23767	0.223318	0.242663	0.263802	0.274833	0.275176	0.287457	0.266474	0.260861	0.254011	0.274056	0.268304	0.265442	0.2446	0.234489	0.23223	0.218087	0.23427	0.233804	0.233006	0.237545	0.23647	0.243722	0.273759	0.298955	0.316181	0.33628	0.352509	0.377061	0.38164	0.396122	0.400457	0.389166	0.371247	0.345419	0.336607	0.32527	0.329543	0.338975	0.328931	0.325988	0.322825	0.309604	0.457506	0.416093	0.392775
	CB_Amp	0.0153846	0.0167103	0.0184744	0.0188501	0.0162202	0.0180562	0.0189367	0.0192744	0.0160719	0.0198992	0.0155601	0.016395	0.016688	0.0191531	0.0184632	0.0177929	0.0195699	0.0190051	0.0213335	0.018203	0.0209539	0.0127582	0.0141057	0.014707	0.0197743	0.020064	0.0160206	0.018553	0.0161424	0.0157158	0.0164474	0.0156287	0.013007	0.0145461	0.0185447	0.0143269	0.0141467	0.0158223	0.017242	0.0196099	0.0188041	0.0228652	0.0255383	0.0224341	0.0218439	0.0180366	0.0150481	0.0156612
	EMG_freq	4	4	4	4	4	4	4	4	4	4	4	4	4	4	4	4	4	4	4	4	4	4	4	4	4	4	4	4	4	4	4	4	4	4	4	4	4	4	4	4	4	4	4	4	4	5	5	5
	CB_freq	4	4	4	4	4	4	4	4	4	4	4	4	4	4	4	4	4	4	4	4	4	4	4	4	4	4	4	4	4	4	4	4	4	4	4	4	4	4	4	4	4	4	4	4	4	5	5	5
Subject 4	EMG_Amp	1.31215	1.13751	1.07573	1.16314	1.14435	1.17573	1.38466	1.48566	1.59078	1.60095	1.63274	1.67059	1.6492	1.65201	1.80464	1.79206	1.80918	1.77372	1.78994	1.9619	2.0205	0.991189	1.06405	1.1297	1.18336	1.14215	1.1741	1.2143	1.26514	1.34372	1.40489	1.53662	1.5396	1.5677	1.62525	1.6883	1.68546	1.71315	1.68287	1.69835	1.66118	1.72125	1.77325	1.7552	1.82884	1.96856	1.95976	2.05967
	CB_Amp	0.0847092	0.0907844	0.0714509	0.0539543	0.0552698	0.0552709	0.0894245	0.069759	0.0914404	0.0939161	0.0846638	0.106772	0.115568	0.0988601	0.13412	0.126225	0.115895	0.129811	0.0980973	0.114316	0.0896108	0.0878206	0.0565452	0.072757	0.0668514	0.0664506	0.0699688	0.0609709	0.0524551	0.0655686	0.0659294	0.0892652	0.0893527	0.0944104	0.113476	0.134697	0.120314	0.147834	0.123685	0.130495	0.119782	0.13012	0.141532	0.127515	0.127406	0.146348	0.147487	0.112842
	EMG_freq	4	4	4	3	3	3	3	3	3	3	3	3	3	3	3	3	3	3	3	3	3	4	4	4	4	4	4	4	4	4	4	4	4	4	4	4	4	4	4	4	4	4	4	4	4	4	4	4
	CB_freq	4	4	4	3	3	3	3	3	3	3	3	3	3	3	3	3	3	3	3	3	3	4	4	4	4	4	4	4	4	4	4	4	4	4	4	4	4	4	4	4	4	4	4	4	4	4	4	4
Subject 5	EMG_Amp	0.173095	0.171134	0.167059	0.160012	0.149845	0.13849	0.135791	0.121909	0.101928	0.0909454	0.0852544	0.0816509	0.0809124	0.0793932	0.0873721	0.0935187	0.0958497	0.0951212	0.0975172	0.103814	0.100102	0.103113	0.105057	0.107606	0.107945	0.106164	0.100563	0.0989384	0.0990076	0.0992015	0.102021	0.107151	0.10994	0.108877	0.10772	0.106152	0.107481	0.104408	0.103905	0.106557	0.101679	0.102699	0.0966119	0.102086	0.109504	0.122531	0.121578	0.124458
	CB_Amp	0.0305651	0.0371113	0.0409383	0.0369825	0.0360984	0.0309948	0.0439013	0.0826862	0.103516	0.139999	0.157902	0.154145	0.155053	0.161632	0.160102	0.192142	0.138501	0.0930079	0.052991	0.0342378	0.036093	0.03434	0.0296981	0.0404814	0.041013	0.0404719	0.05238	0.0664496	0.0568189	0.0466138	0.0661901	0.0469138	0.0515395	0.0492901	0.0379485	0.0574998	0.0724145	0.066281	0.0602166	0.0481325	0.0481405	0.0461116	0.0493229	0.0479795	0.0311583	0.0237731	0.0377012	0.0336763
	EMG_freq	4	4	4	4	4	4	4	4	4	4	4	4	4	4	4	4	4	4	4	4	4	4	4	4	4	4	4	4	4	4	4	4	4	4	4	4	5	5	5	5	5	6	6	5	6	6	6	6
	CB_freq	4	4	4	4	4	4	4	4	4	4	4	4	4	4	4	4	4	4	4	4	4	4	4	4	4	4	4	4	4	4	4	4	4	4	4	4	5	5	5	5	5	6	6	5	6	6	6	6
Subject 6	EMG_Amp	0.0271921	0.0251364	0.0248277	0.0250427	0.0245238	0.0243128	0.0278757	0.0324741	0.0350391	0.0370279	0.0380093	0.0380338	0.0363938	0.034757	0.0338518	0.0218444	0.0206118	0.0143684	0.0126743	0.00986093	0.00881754	0.00600326	0.00417186	0.00394659	0.0039107	0.00350898	0.00329585	0.00508485	0.00492282	0.00483541	0.00433947	0.00402635	0.00394053	0.00353118	0.00331493	0.0032554	0.0117556	0.00536503	0.00541613	0.0058991	0.00611824	0.00615258	0.00580895	0.00563042	0.00507033	0.00482113	0.00483021	0.00408509
	CB_Amp	0.0245021	0.0231523	0.0257406	0.0270787	0.0209457	0.0240328	0.030546	0.0318905	0.0306374	0.0293654	0.0369372	0.0449692	0.0513775	0.0478012	0.0458224	0.0498112	0.0368299	0.0287497	0.0314536	0.0240688	0.02878	0.0218079	0.0281666	0.0214615	0.0308548	0.0264342	0.0331458	0.0263622	0.0428552	0.0616541	0.0417961	0.0446508	0.0459353	0.0399392	0.0440416	0.0480021	0.0859024	0.0989319	0.0739276	0.103934	0.0842811	0.0813717	0.0566243	0.0525363	0.0589059	0.0453162	0.0417554	0.0457775
	EMG_freq	4	4	4	4	4	4	4	4	4	4	4	4	4	4	4	4	4	4	4	4	4	4	4	4	4	4	4	4	4	4	4	4	4	4	4	4	5	5	5	5	5	5	5	5	5	5	5	5
	CB_freq	4	4	4	4	4	4	4	4	4	4	4	4	4	4	4	4	4	4	4	4	4	4	4	4	4	4	4	4	4	4	4	4	4	4	4	4	5	5	5	5	5	5	5	5	5	5	5	5
Subject 7	EMG_Amp	0.0017794	0.00152739	0.00228419	0.00265203	0.00262907	0.00276208	0.00305758	0.00283985	0.003107	0.00342505	0.00322948	0.00366248	0.00319669	0.00320159	0.0032505	0.00355408	0.00370328	0.00363669	0.00394504	0.00368182	0.00324799	0.00310797	0.00320376	0.00306168	0.00315989	0.00333671	0.00290995	0.00245427	0.0028126	0.00271951	0.00268472	0.0028703	0.00281029	0.00244205	0.00227907	0.00285132	0.00278673	0.00264663	0.00272157	0.00298914	0.00274863	0.00317602	0.00325242	0.00327546	0.00300806	0.00268783	0.00272096	0.00258507
	CB_Amp	0.242393	0.310251	0.20021	0.265867	0.300398	0.190185	0.190547	0.220187	0.265881	0.211113	0.225344	0.222063	0.255284	0.203672	0.201523	0.251719	0.27885	0.190693	0.24198	0.227038	0.208658	0.209287	0.242204	0.187385	0.166244	0.210832	0.204205	0.255989	0.232211	0.190447	0.227348	0.208971	0.239868	0.261698	0.236602	0.239546	0.206637	0.156117	0.281477	0.183026	0.211797	0.24053	0.229757	0.242813	0.26878	0.233588	0.265886	0.237238
	EMG_freq	3	3	3	3	3	3	3	3	3	3	3	3	3	3	3	3	3	3	3	3	3	3	3	3	3	3	3	3	3	3	3	3	3	3	3	3	3	3	3	3	3	3	3	3	3	3	3	3
	CB_freq	3	3	3	3	3	3	3	3	3	3	3	3	3	3	3	3	3	3	3	3	3	3	3	3	3	3	3	3	3	3	3	3	3	3	3	3	3	3	3	3	3	3	3	3	3	3	3	3
Subject 8	EMG_Amp	0.259543	0.246708	0.236285	0.224797	0.226441	0.224996	0.21343	0.209447	0.221699	0.217631	0.217931	0.218012	0.21278	0.208633	0.209806	0.215055	0.217004	0.21066	0.221394	0.230928	0.243229	0.267292	0.299975	0.319885	0.335084	0.355736	0.378764	0.392167	0.407878	0.408709	0.418582	0.426859	0.434734	0.417455	0.437175	0.418063	0.415248	0.387491	0.384318	0.378262	0.36993	0.376178	0.379606	0.370779	0.376318	0.235466	0.240125	0.23936
	CB_Amp	0.0454894	0.0557531	0.0486713	0.0461371	0.0439995	0.0426512	0.0443096	0.0487441	0.0552594	0.0534468	0.053522	0.0578078	0.0569885	0.0658143	0.0807853	0.0827624	0.0778351	0.0917917	0.0794019	0.0770359	0.0746872	0.0712119	0.0699823	0.0464584	0.0557189	0.0550108	0.0642403	0.0617883	0.0585176	0.0512499	0.0628684	0.0644184	0.0665187	0.065875	0.0580997	0.0764795	0.0642892	0.0835226	0.0767633	0.0832787	0.0878595	0.0860749	0.0883882	0.0687717	0.0755458	0.0537939	0.0665522	0.0815363
	EMG_freq	4	4	4	4	4	4	4	4	4	4	4	4	4	4	4	4	4	4	4	4	4	4	4	4	4	4	4	4	4	4	4	4	4	4	4	4	4	4	4	4	4	4	4	4	4	5	5	5
	CB_freq	4	4	4	4	3	3	3	3	3	3	3	3	4	3	4	3	3	4	4	3	3	3	3	3	3	3	3	3	4	4	3	3	3	3	3	4	4	4	4	4	4	4	4	3	3	5	5	5
Subject 9	EMG_Amp	0.102122	0.104238	0.11356	0.118351	0.124633	0.113668	0.114544	0.121862	0.123489	0.122261	0.129827	0.134481	0.130704	0.130906	0.145595	0.168405	0.194475	0.193712	0.21521	0.233852	0.256497	0.263389	0.281213	0.29381	0.306954	0.291459	0.290175	0.312975	0.313976	0.331387	0.361734	0.382789	0.379503	0.376185	0.377196	0.384696	0.394932	0.396439	0.381733	0.344443	0.320859	0.30127	0.290344	0.286733	0.267646	0.250328	0.212473	0.210896
	CB_Amp	0.0344321	0.0297189	0.0413249	0.0321743	0.0259027	0.025065	0.0245931	0.0248687	0.0236646	0.0165977	0.0169036	0.0150036	0.0138022	0.0161017	0.0142244	0.012377	0.0162575	0.0130841	0.0150819	0.0114991	0.0093641	0.00886237	0.0131651	0.0111871	0.0161331	0.0147181	0.0170275	0.0135258	0.0192032	0.021578	0.0186932	0.0211598	0.0192384	0.0203222	0.017036	0.0216571	0.0211908	0.0238346	0.0180407	0.0168663	0.0207174	0.0213237	0.0142522	0.0161193	0.0189751	0.0166296	0.0127602	0.0151424
	EMG_freq	4	4	4	4	4	4	4	4	4	4	4	4	4	4	4	4	4	4	4	4	4	4	4	4	4	4	4	4	4	4	4	4	4	4	4	4	4	4	4	4	4	4	4	4	4	4	4	4
	CB_freq	4	4	4	4	4	4	4	4	4	4	4	4	4	4	4	4	4	4	4	4	4	4	4	4	4	4	4	4	4	4	4	4	4	4	4	4	4	4	4	4	4	4	4	4	4	4	4	4
Subject 10	EMG_Amp	0.0965792	0.103257	0.114775	0.11946	0.125496	0.122358	0.141659	0.168679	0.180964	0.19337	0.195303	0.194011	0.204138	0.203838	0.21445	0.211964	0.186004	0.181503	0.18109	0.209096	0.22161	0.231081	0.231816	0.245657	0.246806	0.254594	0.264424	0.271687	0.247485	0.233807	0.20903	0.190158	0.177148	0.175219	0.157052	0.154103	0.15461	0.167837	0.171614	0.171353	0.171311	0.182564	0.179652	0.171806	0.170461	0.176636	0.180481	0.181999
	CB_Amp	0.0144029	0.00762111	0.00901382	0.010734	0.0120422	0.00807176	0.0104611	0.00905373	0.00902007	0.00976445	0.0148004	0.0135413	0.0178606	0.0177322	0.0195787	0.0207713	0.0212241	0.0222471	0.0225184	0.0254278	0.0280629	0.02626	0.026806	0.0276264	0.0256739	0.0244547	0.0281435	0.0275329	0.0236665	0.0257692	0.0221208	0.0188988	0.0180465	0.0160504	0.0152448	0.0128512	0.0194975	0.0220301	0.0290851	0.0258724	0.031919	0.0264032	0.0240374	0.0249289	0.0257091	0.0296101	0.022068	0.018816
	EMG_freq	3	4	4	4	4	4	4	4	4	4	4	4	4	4	4	4	4	4	4	4	4	4	4	4	4	4	4	4	4	4	4	4	4	4	4	4	3	3	3	3	3	3	3	3	3	3	3	3
	CB_freq	3	4	4	4	4	4	4	4	4	4	4	4	4	4	4	4	4	4	4	4	4	4	4	4	4	4	4	4	4	4	4	4	4	4	4	4	3	3	3	3	3	3	3	3	3	3	3	3
[truncated: 126 more columns]

## Sheet: Fig. 7 J,K,L
	Sound off								Sound on									Fig 7L
	Increased statbility				Decreased stability				From the group of increased stability				From the group of decreased stability					Sound off				Sound on
	Baseline	tACS on	tACS off		Baseline	tACS on	tACS off		Baseline	tACS on	tACS off		Baseline	tACS on	tACS off			16.3358	39.8282	59.9126		72.2681	103.909	133.76
	0.428489	1.0447	1.57151		1.31028	0.964203	0.689722		0.701538	1.00869	1.29846		1.02545	0.921105	0.974546			11.1486	12.319	31.0896		69.5658	25.2336	70.759
	0.527894	0.583311	1.47211		0.88995	0.365569	1.11005		0.991497	0.359645	1.0085		0.792419	0.76589	1.20758			14.5276	31.7354	47.0444		70.1879	77.8838	83.5837
	0.471889	1.03084	1.52811		1.47646	0.984883	0.52354		0.912885	1.01298	1.08711		1.0207	0.81816	0.979301			10.526	7.74583	5.54082		144.705	129.98	137.521
	0.899181	2.46655	1.10082		1.74308	0.603155	0.25692		0.873896	0.960756	1.1261		1.07778	0.843476	0.92222			4.57509	1.87933	5.70659		45.5728	44.0472	69.4493
	1.0458	3.23236	0.954197		1.32436	0.590141	0.675641		0.779487	1.33284	1.22051		0.316592	1.46447	1.68341			14.1556	9.4426	5.01946		150.596	120.713	144.488
	1.05804	2.11988	0.941956		1.55417	0.70414	0.445825		0.849799	0.943861	1.1502		0.903812	0.978219	1.09619			37.7328	13.0566	5.5616		148.367	116.113	126.953
	1.75612	2.43779	0.243879		1.79154	1.52394	0.208456		1.00729	1.00591	0.992715		0.79723	1.14439	1.20277			14.3846	6.40984	7.3385		15.8301	73.2256	84.173
	0.829067	2.06314	1.17093		1.53464	1.48195	0.465359		0.847265	0.738719	1.15274		1.04594	1.80306	0.954063			33.6862	15.262	9.66312		116.18	125.745	140.909
	1.48206	1.98283	0.517943		1.69487	1.21853	0.305131		1.21433	1.33267	0.785665		0.678752	0.997083	1.32125			37.4573	102.749	45.8569		96.1837	105.744	123.943
																		21.278	65.7659	19.4142		46.6686	79.7983	73.0732
Wilcoxon Signed Rank test
	Base vs on	On vs off	base vs off		Base vs on	On vs off	base vs off		Base vs on	On vs off	base vs off		Base vs on	On vs off	base vs off			25.773	21.9233	2.99884		123.409	177.15	186.186
	0.00390625	0.0546875	0.652344		0.00390625	0.0742188	0.0078125		0.425781	0.25	0.0976562		0.300781	0.128906	0.164062			6.89419	6.6575	2.09057		30.4424	52.4788	27.7684
																		20.8072	14.9594	3.74596		95.3063	140.004	185.522
																		26.9106	37.3564	3.73717		82.8791	82.7657	81.6802
																		6.53117	16.2529	9.22431		31.047	27.0694	42.2405
																		27.7097	37.0726	9.68389		92.8949	101.947	60.1023
