# Supplementary material for: The cerebellum computes frequency dynamics for motions with numerical precision and cross-individual uniformity
Source: Research Square preprint supplement (doi:10.21203/rs.3.rs-4615547/v1), 2024-07-30
Supplement: Supplementary file 2 [file ce0cdc9531f2d81099761a3a.xlsx]

## Sheet: FigS1 I,J
FigS1 I													FigS1 J
DCN X Motion													DCN X ACC
Baseline	8Hz	12Hz	16Hz	20Hz	15Hz	10Hz							Baseline	8Hz	12Hz	16Hz	20Hz	15Hz	10Hz
820.508	2096.29	6640.32	6951.08	18979.4	8494.64	3049.47							797.185	1230.79	2059.78	1442.58	1671.31	1828.78	1205.99
800.889	1833.97	4194.83	9033.72	11391.9	3616.71	1904.4							765.846	904.031	1064.09	1713.7	1321.53	1031.88	915.245
678.485	2701.08	3060.27	4368.97	6844.43	4790.15	1849.65							723.006	1515	1209	1308.5	1302.67	1222.54	1045.64
903.23	2371.33	3146.74	5389.8	5585.42	3935	2285.68							870.283	1037.48	971.964	1707.25	1488.3	938.106	1225.17
539.226	952.551	2050.93	5089.58	4968.69	2530.51	1207.46							578.708	629.265	712.729	1010.57	703.934	730.058	524.253
1478.95	2861.02	7478.29	8203.16	14708.5	5225.38	4015.55							1383.26	1711.55	2379.73	2429.89	3664.13	2047.31	1826.74
1567.17	4376.76	7048.89	15652	12702.7	18966.7	4619.85							1401.78	2102.29	2761.19	3192.19	1336.35	5096.45	2107.45
4562.38	6070.02	8509.73	13415.2	13945.5	12956.4	7797.57							3518.3	2888.75	4269.62	4828.31	5276.72	4791.57	3995.07
Table Analyzed	DCN x Motion Xcorr												Table Analyzed	DCN x ACC Xcorr
Friedman test													Friedman test
P value	<0.0001												P value	0.0002
Exact or approximate P value?	Approximate												Exact or approximate P value?	Approximate
P value summary	****												P value summary	***
Are means signif. different? (P < 0.05)	Yes												Are means signif. different? (P < 0.05)	Yes
Number of groups	7												Number of groups	7
Friedman statistic	43.98												Friedman statistic	26.84
Data summary													Data summary
Number of treatments (columns)	7												Number of treatments (columns)	7
Number of subjects (rows)	8												Number of subjects (rows)	8
Multiple comparison													Multiple comparison
Number of families	1												Number of families	1
Number of comparisons per family	21												Number of comparisons per family	21
Alpha	0.05												Alpha	0.05
Dunn's multiple comparisons test	Rank sum diff.	Significant?	Summary	Adjusted P Value									Dunn's multiple comparisons test	Rank sum diff.	Significant?	Summary	Adjusted P Value
Baseline vs. 8Hz	-10	No	ns	>0.9999	A-B								Baseline vs. 8Hz	-14	No	ns	>0.9999	A-B
Baseline vs. 12Hz	-26	No	ns	0.0551	A-C								Baseline vs. 12Hz	-26	No	ns	0.0551	A-C
Baseline vs. 16Hz	-39	Yes	***	0.0001	A-D								Baseline vs. 16Hz	-38	Yes	***	0.0002	A-D
Baseline vs. 20Hz	-45	Yes	****	<0.0001	A-E								Baseline vs. 20Hz	-30	Yes	*	0.0109	A-E
Baseline vs. 15Hz	-34	Yes	**	0.0017	A-F								Baseline vs. 15Hz	-27	Yes	*	0.0374	A-F
Baseline vs. 10Hz	-14	No	ns	>0.9999	A-G								Baseline vs. 10Hz	-12	No	ns	>0.9999	A-G
8Hz vs. 12Hz	-16	No	ns	>0.9999	B-C								8Hz vs. 12Hz	-12	No	ns	>0.9999	B-C
8Hz vs. 16Hz	-29	Yes	*	0.0166	B-D								8Hz vs. 16Hz	-24	No	ns	0.115	B-D
8Hz vs. 20Hz	-35	Yes	**	0.0011	B-E								8Hz vs. 20Hz	-16	No	ns	>0.9999	B-E
8Hz vs. 15Hz	-24	No	ns	0.115	B-F								8Hz vs. 15Hz	-13	No	ns	>0.9999	B-F
8Hz vs. 10Hz	-4	No	ns	>0.9999	B-G								8Hz vs. 10Hz	2	No	ns	>0.9999	B-G
12Hz vs. 16Hz	-13	No	ns	>0.9999	C-D								12Hz vs. 16Hz	-12	No	ns	>0.9999	C-D
12Hz vs. 20Hz	-19	No	ns	0.5857	C-E								12Hz vs. 20Hz	-4	No	ns	>0.9999	C-E
12Hz vs. 15Hz	-8	No	ns	>0.9999	C-F								12Hz vs. 15Hz	-1	No	ns	>0.9999	C-F
12Hz vs. 10Hz	12	No	ns	>0.9999	C-G								12Hz vs. 10Hz	14	No	ns	>0.9999	C-G
16Hz vs. 20Hz	-6	No	ns	>0.9999	D-E								16Hz vs. 20Hz	8	No	ns	>0.9999	D-E
16Hz vs. 15Hz	5	No	ns	>0.9999	D-F								16Hz vs. 15Hz	11	No	ns	>0.9999	D-F
16Hz vs. 10Hz	25	No	ns	0.0801	D-G								16Hz vs. 10Hz	26	No	ns	0.0551	D-G
20Hz vs. 15Hz	11	No	ns	>0.9999	E-F								20Hz vs. 15Hz	3	No	ns	>0.9999	E-F
20Hz vs. 10Hz	31	Yes	**	0.007	E-G								20Hz vs. 10Hz	18	No	ns	0.7821	E-G
15Hz vs. 10Hz	20	No	ns	0.4334	F-G								15Hz vs. 10Hz	15	No	ns	>0.9999	F-G
Test details	Rank sum 1	Rank sum 2	Rank sum diff.	n1	n2								Test details	Rank sum 1	Rank sum 2	Rank sum diff.	n1	n2
Baseline vs. 8Hz	8	18	-10	8	8								Baseline vs. 8Hz	11	25	-14	8	8
Baseline vs. 12Hz	8	34	-26	8	8								Baseline vs. 12Hz	11	37	-26	8	8
Baseline vs. 16Hz	8	47	-39	8	8								Baseline vs. 16Hz	11	49	-38	8	8
Baseline vs. 20Hz	8	53	-45	8	8								Baseline vs. 20Hz	11	41	-30	8	8
Baseline vs. 15Hz	8	42	-34	8	8								Baseline vs. 15Hz	11	38	-27	8	8
Baseline vs. 10Hz	8	22	-14	8	8								Baseline vs. 10Hz	11	23	-12	8	8
8Hz vs. 12Hz	18	34	-16	8	8								8Hz vs. 12Hz	25	37	-12	8	8
8Hz vs. 16Hz	18	47	-29	8	8								8Hz vs. 16Hz	25	49	-24	8	8
8Hz vs. 20Hz	18	53	-35	8	8								8Hz vs. 20Hz	25	41	-16	8	8
8Hz vs. 15Hz	18	42	-24	8	8								8Hz vs. 15Hz	25	38	-13	8	8
8Hz vs. 10Hz	18	22	-4	8	8								8Hz vs. 10Hz	25	23	2	8	8
12Hz vs. 16Hz	34	47	-13	8	8								12Hz vs. 16Hz	37	49	-12	8	8
12Hz vs. 20Hz	34	53	-19	8	8								12Hz vs. 20Hz	37	41	-4	8	8
12Hz vs. 15Hz	34	42	-8	8	8								12Hz vs. 15Hz	37	38	-1	8	8
12Hz vs. 10Hz	34	22	12	8	8								12Hz vs. 10Hz	37	23	14	8	8
16Hz vs. 20Hz	47	53	-6	8	8								16Hz vs. 20Hz	49	41	8	8	8
16Hz vs. 15Hz	47	42	5	8	8								16Hz vs. 15Hz	49	38	11	8	8
16Hz vs. 10Hz	47	22	25	8	8								16Hz vs. 10Hz	49	23	26	8	8
20Hz vs. 15Hz	53	42	11	8	8								20Hz vs. 15Hz	41	38	3	8	8
20Hz vs. 10Hz	53	22	31	8	8								20Hz vs. 10Hz	41	23	18	8	8
15Hz vs. 10Hz	42	22	20	8	8								15Hz vs. 10Hz	38	23	15	8	8

## Sheet: FigS2 C, D, E, F, G, H, I, J, K
FigS2C									FigS2D								Fig S2E				Fig2F					Fig2G																			Fig2H
DCN Peak Amplitude									Motion Peak Amplitude								Whole period Peak Amplitude				Whole period Peak Frequency					Second-by-second Peak Amplitude (Individual)																			Second-by-second Peak Frequency (Individual)
																										Mouse 1			Mouse 2			Mouse 3			Mouse 4			Mouse 5			Mouse 6				Mouse 1			Mouse 2
																	DCN	Motion			DCN	Motion				DCN	Motion		DCN	Motion		DCN	Motion		DCN	Motion		DCN	Motion		DCN	Motion			DCN	Motion		DCN	Motion
Baseline	8 Hz	12 Hz	16 Hz	20 Hz	15 Hz	10 Hz			Baseline	8 Hz	12 Hz	16 Hz	20 Hz	15 Hz	10 Hz		47.1305	0.00091208			8	8				50.7733	0.00089557		17.055	0.00151731		14.26	0.000239914		7.31235	0.00170851		2.79914	0.00101845		43.8868	0.000577004			8	8		8	8
13.0441	47.1305	56.0567	43.7878	205.144	47.9138	31.4645			3.95964e-05	0.00091208	0.00485141	0.0119527	0.0268116	0.00890795	0.00214514		56.0567	0.00485141			12	12				53.8295	0.000813277		17.4572	0.00150546		14.5028	0.000322392		6.78923	0.00175919		2.96708	0.000982704		45.6872	0.000541617			8	8		8	8
5.05782	13.1916	22.9152	30.137	31.0646	15.0952	9.04214			7.46753e-05	0.00127353	0.00401642	0.011095	0.0280857	0.00793885	0.00217807		43.7878	0.0119527			16	16				53.7367	0.000754988		17.0028	0.00151237		14.3778	0.000399096		6.60253	0.00173428		3.01582	0.000967084		49.2157	0.000563904			8	8		8	8
4.20405	10.9897	10.6921	11.8369	13.1717	17.6296	9.71988			5.60367e-05	0.000582458	0.00175087	0.0058318	0.0197636	0.0040653	0.000720261		205.144	0.0268116			20	20				53.5441	0.000764646		16.4463	0.00150712		14.1808	0.000442154		6.76301	0.00176275		2.95267	0.00096141		46.7939	0.000543626			8	8		8	8
4.51819	18.6163	16.4296	18.1901	12.6324	16.7624	13.819			0.000168487	0.00117165	0.00374466	0.0120825	0.0313159	0.00828844	0.00329141		47.9138	0.00890795			15	15				54.9129	0.000749573		16.7643	0.00150808		14.4655	0.000458214		6.53904	0.00176418		3.00168	0.000965756		44.5761	0.000563053			8	8		8	8
1.03074	4.08922	5.28809	10.9623	3.76785	4.313	3.85119			8.18946e-05	0.00109811	0.00396855	0.0111532	0.027458	0.00851535	0.00196284		31.4645	0.00214514			10	10				56.6824	0.00077216		16.4219	0.00138799		13.9902	0.0004913		7.00498	0.00175563		2.87867	0.000947603		40.638	0.000521052			8	8		8	8
18.0016	43.0324	67.2418	77.4578	92.3458	35.2747	46.2303			7.78902e-05	0.00090586	0.00412186	0.0117847	0.026024	0.00886599	0.00241439		13.1916	0.00127353			8	8				56.6987	0.000788807		16.4615	0.00127126		13.3924	0.000514094		7.65987	0.00176524		2.66537	0.00093553		40.6183	0.000516885			8	8		8	8
17.4737	53.5194	116.542	162.334	69.1907	204.338	58.834			0.000103307	0.00162425	0.00384231	0.0125721	0.026026	0.00762151	0.00188082		22.9152	0.00401642			12	12				54.0649	0.000800595		16.26	0.00111838		12.3703	0.000533466		8.25731	0.00167155		2.5891	0.000897673		36.257	0.000519148			8	8		8	8
25.3697	218.279	144.599	169.969	104.2	196.281	132.871			9.96605e-05	0.00105087	0.00412118	0.011494	0.0274246	0.00899573	0.00206002		30.137	0.011095			16	16				58.3603	0.000868239		16.0188	0.000960027		11.6215	0.000559507		8.15973	0.00158965		2.65025	0.000825227		33.0601	0.000529758			8	8		8	8
																	31.0646	0.0280857			20	20				55.4135	0.000898361		14.6677	0.00103978		10.7169	0.00059028		10.0763	0.00150922		3.67642	0.000752691		34.336	0.000553916			8	8		8	8
																	15.0952	0.00793885			15	15				51.6484	0.000931601		13.7155	0.00125139		9.58639	0.000611522		10.1186	0.0015646		4.44806	0.000738622		35.4034	0.000666682			8	8		8	8
																	9.04214	0.00217807			10	10				52.3389	0.000966348		11.2426	0.0012436		9.28807	0.000637964		10.2315	0.00165121		4.6428	0.000698581		38.0054	0.000735432			8	8		8	8
																	10.9897	0.000582458			8	8				52.2432	0.000973583		11.5448	0.00116461		8.66113	0.000660681		10.5617	0.00174099		5.07137	0.00068538		38.0055	0.000789036			8	8		8	8
Table Analyzed	DCN LFP Peak Amp								Table Analyzed	Motion Peak Amp							10.6921	0.00175087			12	12				56.2484	0.000938212		12.4783	0.00118655		8.89457	0.000678715		10.675	0.00176788		5.28717	0.000661497		37.1474	0.000795145			8	8		8	8
																	11.8369	0.0058318			16	16				56.7275	0.000987162		13.9237	0.00113593		8.2451	0.000698221		11.0702	0.00175491		5.41753	0.000675569		38.718	0.000822809			8	8		8	8
Friedman test									Friedman test								13.1717	0.0197636			20	20				56.4283	0.000996065		13.8749	0.00117176		7.67471	0.000708193		11.4639	0.00170768		5.47818	0.00067608		38.0323	0.000814653			8	8		8	8
P value	0.0002								P value	<0.0001							17.6296	0.0040653			15	15				48.9014	0.000956669		13.7743	0.00120973		7.46384	0.000706844		12.4248	0.00157005		5.79221	0.000656534		37.5887	0.000828066			8	8		8	8
Exact or approximate P value?	Approximate								Exact or approximate P value?	Approximate							9.71988	0.000720261			10	10				46.4941	0.000953107		14.1627	0.0013017		8.35381	0.000691028		13.7758	0.00153843		5.86536	0.000693555		38.1373	0.000852347			8	8		8	8
P value summary	***								P value summary	****							18.6163	0.00117165			8	8				47.5365	0.000962457		13.3111	0.00139627		7.99993	0.000693868		13.0765	0.00152881		5.71053	0.000677731		40.2958	0.000866902			8	8		8	8
Are means signif. different? (P < 0.05)	Yes								Are means signif. different? (P < 0.05)	Yes							16.4296	0.00374466			12	12				49.2721	0.000925795		11.9692	0.0014434		7.69033	0.000724907		12.7933	0.00153947		5.50354	0.000686059		36.0463	0.000901378			8	8		8	8
Number of groups	7								Number of groups	7							18.1901	0.0120825			16	16				46.6359	0.000910533		11.343	0.00142807		7.43113	0.000683964		13.7483	0.00147804		5.06802	0.00068441		32.9059	0.000965325			8	8		8	8
Friedman statistic	25.88								Friedman statistic	48							12.6324	0.0313159			20	20				46.3338	0.000891671		11.2344	0.00144696		6.91924	0.000630009		13.3848	0.0014432		5.02012	0.000710919		29.9292	0.00103342			8	8		8	8
																	16.7624	0.00828844			15	15				45.6312	0.000937111		11.2406	0.00143602		7.22626	0.000604136		12.9784	0.00142436		5.00202	0.000726935		31.1763	0.00102193			8	8		8	8
Data summary									Data summary								13.819	0.00329141			10	10				44.9517	0.000941814		11.5967	0.0014495		7.56792	0.000614275		15.4858	0.00139822		4.99013	0.000728746		32.5239	0.00106073			8	8		8	8
Number of treatments (columns)	7								Number of treatments (columns)	7							4.08922	0.00109811			8	8				46.1669	0.00094033		11.192	0.00149953		7.83108	0.000617885		16.8114	0.00137465		5.18886	0.000720531		36.2527	0.00121552			8	8		8	8
Number of subjects (rows)	8								Number of subjects (rows)	8							5.28809	0.00396855			12	12				45.2087	0.000932859		11.2552	0.0015145		8.15266	0.00061361		18.0233	0.00133768		5.34046	0.000737287		39.7993	0.00129678			8	8		8	8
																	10.9623	0.0111532			16	16				44.6802	0.00091918		10.9547	0.00149778		8.03559	0.000632754		17.6839	0.0013139		5.87196	0.000726207		39.4693	0.00134277			8	8		8	8
																	3.76785	0.027458			20	20				38.9338	0.000893637		12.2979	0.00146896		8.05221	0.000631396		18.1548	0.00134073		5.99786	0.000699956		40.9124	0.00141045			8	8		8	8
Multiple comparison									Multiple comparison								4.313	0.00851535			15	15				41.587	0.000875457		13.0907	0.00145132		8.05337	0.000630977		16.1923	0.00134833		4.91056	0.000699349		43.5663	0.00145063			8	8		8	8
Number of families	1								Number of families	1							3.85119	0.00196284			10	10				44.7193	0.000889415		13.8313	0.00120911		7.81404	0.000641493		16.4131	0.00131441		4.48743	0.000684196		44.5028	0.00147108			8	8		8	8
Number of comparisons per family	21								Number of comparisons per family	21							43.0324	0.00090586			8	8				60.2636	0.000848012		15.1241	0.00117405		8.16214	0.000646104		16.6857	0.00125081		5.11743	0.000650961		43.9351	0.00148739			8	8		8	8
Alpha	0.05								Alpha	0.05							67.2418	0.00412186			12	12				62.7719	0.000850289		15.0555	0.00125704		8.23691	0.000646603		17.3555	0.00116277		4.77337	0.000661092		43.6259	0.00142431			8	8		8	8
																	77.4578	0.0117847			16	16				58.9708	0.00087459		13.6344	0.00126042		8.64916	0.000647708		18.1082	0.00107869		4.52807	0.000689291		42.887	0.00137368			8	8		8	8
Dunn's multiple comparisons test	Rank sum diff.	Significant?	Summary	Adjusted P Value					Dunn's multiple comparisons test	Rank sum diff.	Significant?	Summary	Adjusted P Value				92.3458	0.026024			20	20				56.2801	0.000932182		12.4502	0.00132267		9.7497	0.000648617		18.9738	0.00101919		4.57319	0.000768576		40.9454	0.0013728			8	8		8	8
Baseline vs. 8 Hz	-26	No	ns	0.0551	A-B				Baseline vs. 8 Hz	-8	No	ns	>0.9999	A-B			35.2747	0.00886599			15	15				48.8633	0.000888878		12.707	0.00140068		10.2338	0.000640931		19.4068	0.000993826		4.72223	0.000796085		41.8416	0.00134172			8	8		8	8
Baseline vs. 12 Hz	-30	Yes	*	0.0109	A-C				Baseline vs. 12 Hz	-24	No	ns	0.115	A-C			46.2303	0.00241439			10	10				49.8383	0.000905513		12.5262	0.00136166		10.3931	0.000625813		19.8232	0.00100355		4.39177	0.000880007		45.5469	0.00130451			8	8		8	8
Baseline vs. 16 Hz	-36	Yes	***	0.0007	A-D				Baseline vs. 16 Hz	-40	Yes	****	<0.0001	A-D			53.5194	0.00162425			8	8				50.9101	0.000953704		11.903	0.00134019		10.0448	0.000617976		18.8497	0.000989911		4.39702	0.00101065		44.8866	0.00129275			8	8		8	8
Baseline vs. 20 Hz	-29	Yes	*	0.0166	A-E				Baseline vs. 20 Hz	-48	Yes	****	<0.0001	A-E			116.542	0.00384231			12	12				45.6626	0.000933602		12.1258	0.00127384		10.0437	0.000628892		19.7751	0.000997291		4.40608	0.00112362		42.1504	0.00130034			8	8		8	8
Baseline vs. 15 Hz	-33	Yes	**	0.0028	A-F				Baseline vs. 15 Hz	-32	Yes	**	0.0045	A-F			162.334	0.0125721			16	16				40.1234	0.000958705		12.9859	0.0012099		10.0741	0.000611495		21.169	0.000916193		4.37611	0.00121115		43.7638	0.00128748			8	8		8	8
Baseline vs. 10 Hz	-14	No	ns	>0.9999	A-G				Baseline vs. 10 Hz	-16	No	ns	>0.9999	A-G			69.1907	0.026026			20	20				41.6853	0.00101314		14.1996	0.00121684		10.3222	0.000619544		22.0653	0.000835158		4.39179	0.00125919		43.1302	0.00126287			8	8		8	8
8 Hz vs. 12 Hz	-4	No	ns	>0.9999	B-C				8 Hz vs. 12 Hz	-16	No	ns	>0.9999	B-C			204.338	0.00762151			15	15				43.2617	0.00106903		16.0692	0.0012414		10.263	0.000609489		23.5565	0.000769969		4.46269	0.00133139		51.7609	0.00118785			8	8		8	8
8 Hz vs. 16 Hz	-10	No	ns	>0.9999	B-D				8 Hz vs. 16 Hz	-32	Yes	**	0.0045	B-D			58.834	0.00188082			10	10				48.9229	0.00106389		16.3463	0.00128237		9.73965	0.000607828		24.3733	0.000719754		4.62312	0.00138117		50.3991	0.00117744			8	8		8	8
8 Hz vs. 20 Hz	-3	No	ns	>0.9999	B-E				8 Hz vs. 20 Hz	-40	Yes	****	<0.0001	B-E			218.279	0.00105087			8	8				51.6885	0.00100034		15.7149	0.00130722		8.92618	0.000588368		23.831	0.000681453		4.41018	0.0014631		49.2862	0.00112887			8	8		8	8
8 Hz vs. 15 Hz	-7	No	ns	>0.9999	B-F				8 Hz vs. 15 Hz	-24	No	ns	0.115	B-F			144.599	0.00412118			12	12				50.0834	0.000937531		15.98	0.00130015		8.27004	0.000573108		23.1468	0.000657109		4.17774	0.00158684		46.8342	0.000996168			8	8		8	8
8 Hz vs. 10 Hz	12	No	ns	>0.9999	B-G				8 Hz vs. 10 Hz	-8	No	ns	>0.9999	B-G			169.969	0.011494			16	16				50.3101	0.000928136		16.2201	0.00132903		8.41831	0.000551767		23.7331	0.000632408		4.01016	0.00174964		46.1948	0.000897972			8	8		8	8
12 Hz vs. 16 Hz	-6	No	ns	>0.9999	C-D				12 Hz vs. 16 Hz	-16	No	ns	>0.9999	C-D			104.2	0.0274246			20	20				51.4612	0.000914157		16.4028	0.00135045		8.99002	0.000532679		25.1012	0.000613219		3.62613	0.00180581		46.3566	0.00084865			8	8		8	8
12 Hz vs. 20 Hz	1	No	ns	>0.9999	C-E				12 Hz vs. 20 Hz	-24	No	ns	0.115	C-E			196.281	0.00899573			15	15				52.167	0.000908378		14.6926	0.00132992		9.10588	0.000545655		26.3919	0.000593573		3.50479	0.00180433		45.5719	0.000767602			8	8		8	8
12 Hz vs. 15 Hz	-3	No	ns	>0.9999	C-F				12 Hz vs. 15 Hz	-8	No	ns	>0.9999	C-F			132.871	0.00206002			10	10				49.1956	0.000939504		13.5218	0.00133399		10.3939	0.000574536		28.704	0.000633073		3.5564	0.00182232		46.2919	0.000751137			8	8		8	8
12 Hz vs. 10 Hz	16	No	ns	>0.9999	C-G				12 Hz vs. 10 Hz	8	No	ns	>0.9999	C-G												46.161	0.000887056		12.3234	0.00132084		11.3238	0.000565277		29.7337	0.000614954		3.39612	0.00193853		46.9749	0.000686215			8	8		8	8
16 Hz vs. 20 Hz	7	No	ns	>0.9999	D-E				16 Hz vs. 20 Hz	-8	No	ns	>0.9999	D-E												29.7935	0.0008991		11.0632	0.00131151		12.3635	0.0005663		30.4513	0.000586887		2.55734	0.00201045		45.5961	0.000583289			8	8		8	8
16 Hz vs. 15 Hz	3	No	ns	>0.9999	D-F				16 Hz vs. 15 Hz	8	No	ns	>0.9999	D-F												30.2713	0.000928709		10.8476	0.00124703		14.7673	0.000571743		30.4356	0.000573104		2.53618	0.0020496		46.4844	0.00058805			8	8		8	8
16 Hz vs. 10 Hz	22	No	ns	0.2288	D-G				16 Hz vs. 10 Hz	24	No	ns	0.115	D-G												31.3395	0.000930052		10.4905	0.00120598		17.2238	0.000553292		31.428	0.000581488		2.84298	0.00200853		46.6102	0.000584027			8	8		8	8
20 Hz vs. 15 Hz	-4	No	ns	>0.9999	E-F				20 Hz vs. 15 Hz	16	No	ns	>0.9999	E-F												32.5051	0.0009263		10.2059	0.0011502		16.9519	0.00055241		31.5847	0.000587847		2.52881	0.00195092		45.2844	0.000638644			8	8		8	8
20 Hz vs. 10 Hz	15	No	ns	>0.9999	E-G				20 Hz vs. 10 Hz	32	Yes	**	0.0045	E-G												31.7034	0.000982064		9.79606	0.00107561		17.2094	0.000544535		32.208	0.000627373		2.02088	0.00189895		44.2708	0.000632045			8	8		8	8
15 Hz vs. 10 Hz	19	No	ns	0.5857	F-G				15 Hz vs. 10 Hz	16	No	ns	>0.9999	F-G												29.8758	0.000982166		9.75606	0.000981537		17.2671	0.000546498		32.4971	0.000611636		1.96513	0.00181584		39.3149	0.000637859			8	8		8	8
																										33.4393	0.000933385		10.1724	0.000934805		17.6751	0.000540964		33.2772	0.000613707		1.97484	0.00169512		41.7357	0.000635635			8	8		8	8
Test details	Rank sum 1	Rank sum 2	Rank sum diff.	n1	n2				Test details	Rank sum 1	Rank sum 2	Rank sum diff.	n1	n2												35.5502	0.000907355		10.9397	0.000905086		17.6576	0.00052102		32.7765	0.000600545		1.98115	0.00148791		50.2538	0.000614245			8	8		8	8
Baseline vs. 8 Hz	8	34	-26	8	8				Baseline vs. 8 Hz	8	16	-8	8	8												35.7168	0.0008877		10.0953	0.000908081		17.3534	0.00049211		32.0611	0.000647725		2.88357	0.00136342		52.2416	0.000602848			8	8		8	8
Baseline vs. 12 Hz	8	38	-30	8	8				Baseline vs. 12 Hz	8	32	-24	8	8												34.0016	0.000860929		8.60853	0.00092377		17.382	0.000473148		30.6118	0.000697166		3.80853	0.00125952		70.7271	0.000589636			8	8		8	8
Baseline vs. 16 Hz	8	44	-36	8	8				Baseline vs. 16 Hz	8	48	-40	8	8												34.3092	0.00085119		6.94938	0.000921268		17.3733	0.0004402		28.6304	0.000850669		4.51905	0.00119012		73.5541	0.000584501			8	8		8	8
Baseline vs. 20 Hz	8	37	-29	8	8				Baseline vs. 20 Hz	8	56	-48	8	8												52.5678	0.00513677		15.2125	0.00400959		7.83484	0.00151919		20.5645	0.00425606		3.76807	0.00362566		32.2406	0.00372729			12	12		12	12
Baseline vs. 15 Hz	8	41	-33	8	8				Baseline vs. 15 Hz	8	40	-32	8	8												52.4142	0.00499738		15.9026	0.00421936		9.96652	0.00154434		20.4238	0.00417739		3.83818	0.0036241		32.8995	0.00365368			12	12		12	12
Baseline vs. 10 Hz	8	22	-14	8	8				Baseline vs. 10 Hz	8	24	-16	8	8												45.8776	0.00479188		17.1294	0.00423027		11.0055	0.00153979		20.8787	0.00413102		3.82585	0.00367341		34.6545	0.00358143			12	12		12	12
8 Hz vs. 12 Hz	34	38	-4	8	8				8 Hz vs. 12 Hz	16	32	-16	8	8												45.3957	0.00463806		18.9276	0.00416993		13.0208	0.00152947		18.8919	0.00417123		3.79803	0.00363939		45.0809	0.00387372			12	12		12	12
8 Hz vs. 16 Hz	34	44	-10	8	8				8 Hz vs. 16 Hz	16	48	-32	8	8												44.5138	0.00466912		21.6257	0.00413814		12.8506	0.00154837		19.3403	0.00419976		3.65272	0.00361011		52.5956	0.00400948			12	12		12	12
8 Hz vs. 20 Hz	34	37	-3	8	8				8 Hz vs. 20 Hz	16	56	-40	8	8												42.4248	0.00469958		22.5225	0.00403556		14.0305	0.00156722		18.2322	0.00415474		4.19526	0.00377251		52.484	0.00396017			12	12		12	12
8 Hz vs. 15 Hz	34	41	-7	8	8				8 Hz vs. 15 Hz	16	40	-24	8	8												43.1948	0.00476511		23.7257	0.0039215		14.7683	0.00156757		15.8977	0.00415707		3.98748	0.00387383		49.2155	0.0039106			12	12		12	12
8 Hz vs. 10 Hz	34	22	12	8	8				8 Hz vs. 10 Hz	16	24	-8	8	8												41.408	0.00480704		25.3471	0.00386682		14.6997	0.00159908		15.7238	0.00417806		4.12661	0.0038901		50.0674	0.00389715			12	12		12	12
12 Hz vs. 16 Hz	38	44	-6	8	8				12 Hz vs. 16 Hz	32	48	-16	8	8												42.5511	0.00477813		27.4598	0.00379172		14.2103	0.00159997		16.4116	0.00418717		4.4143	0.00392907		49.8423	0.0040713			12	12		12	12
12 Hz vs. 20 Hz	38	37	1	8	8				12 Hz vs. 20 Hz	32	56	-24	8	8												43.2682	0.00460754		29.4278	0.00376486		13.713	0.00170437		17.2343	0.00410177		4.48915	0.00387681		50.0575	0.00408487			12	12		12	12
12 Hz vs. 15 Hz	38	41	-3	8	8				12 Hz vs. 15 Hz	32	40	-8	8	8												40.4716	0.00429868		31.3776	0.00381449		14.6446	0.00174062		17.0075	0.0040593		4.54912	0.00382658		49.4688	0.00409744			12	12		12	12
12 Hz vs. 10 Hz	38	22	16	8	8				12 Hz vs. 10 Hz	32	24	8	8	8												38.1134	0.00403366		32.7981	0.00377909		14.7952	0.00172455		15.8134	0.00402287		4.46405	0.00380895		48.5411	0.00409452			12	12		12	12
16 Hz vs. 20 Hz	44	37	7	8	8				16 Hz vs. 20 Hz	48	56	-8	8	8												36.0801	0.00400664		34.5878	0.00367742		14.2157	0.00169581		15.2756	0.00390201		4.47976	0.00385877		48.3261	0.00410694			12	12		12	12
16 Hz vs. 15 Hz	44	41	3	8	8				16 Hz vs. 15 Hz	48	40	8	8	8												33.1729	0.00404705		36.3049	0.00359955		14.2989	0.00167385		15.4891	0.00384889		4.61828	0.00399268		44.6779	0.00413589			12	12		12	12
16 Hz vs. 10 Hz	44	22	22	8	8				16 Hz vs. 10 Hz	48	24	24	8	8												31.1965	0.00406396		35.3801	0.00359834		14.2356	0.00165846		15.1819	0.00388284		4.68132	0.00404682		44.8218	0.00413062			12	12		12	12
20 Hz vs. 15 Hz	37	41	-4	8	8				20 Hz vs. 15 Hz	56	40	16	8	8												25.7789	0.00416409		33.2406	0.00361991		15.5671	0.00166049		15.0297	0.00393972		4.18199	0.00412193		46.4031	0.00418271			12	12		12	12
20 Hz vs. 10 Hz	37	22	15	8	8				20 Hz vs. 10 Hz	56	24	32	8	8												25.1543	0.0042398		33.2432	0.00364271		16.6587	0.00167347		13.4625	0.00394827		3.97801	0.00412036		50.9643	0.00424836			12	12		12	12
15 Hz vs. 10 Hz	41	22	19	8	8				15 Hz vs. 10 Hz	40	24	16	8	8												22.8283	0.00443162		32.6064	0.00367283		17.8617	0.00174177		12.5925	0.00391412		4.23703	0.00416092		54.1722	0.0042535			12	12		12	12
																										24.9276	0.00457218		31.2788	0.00372902		17.8896	0.00173981		11.5042	0.00396874		4.1252	0.00407396		56.3935	0.00427695			12	12		12	12
																										30.8522	0.00461375		29.5374	0.00375289		16.3513	0.00170801		11.2561	0.00396873		4.25839	0.00408544		56.2925	0.00426962			12	12		12	12
																										30.9581	0.00464836		28.3379	0.00370761		14.4389	0.0016791		11.6253	0.00391629		4.23521	0.00414937		54.0754	0.00428413			12	12		12	12
																										30.2781	0.00463527		26.9175	0.00374716		14.461	0.00170713		11.5621	0.00393		4.25794	0.00408083		50.5069	0.00429414			12	12		12	12
																										33.7156	0.00462168		24.9752	0.00390777		12.106	0.00175461		11.0176	0.00391175		4.4473	0.00414343		43.7932	0.00417113			12	12		12	12
																										36.2044	0.00459931		22.2742	0.00399195		12.2243	0.00176597		11.7843	0.00394666		4.66635	0.00429614		38.0887	0.00393081			12	12		12	12
																										35.9844	0.00449618		21.8132	0.00413435		11.1558	0.00173613		12.924	0.00392613		4.22895	0.00425733		42.6031	0.00392012			12	12		12	12
																										34.8669	0.0044056		22.531	0.00419601		10.2824	0.0017405		13.0886	0.00389538		4.26174	0.00411741		43.7863	0.00394142			12	12		12	12
																										40.8698	0.00443967		20.9844	0.00427877		9.99549	0.0017513		12.2992	0.00387921		4.05882	0.0041426		45.353	0.00392827			12	12		12	12
																										51.3112	0.00468428		18.9974	0.0043445		10.0079	0.00177217		11.5977	0.00386308		3.84882	0.00418234		48.9147	0.00384437			12	12		12	12
																										54.7225	0.00471566		17.9895	0.00443384		10.2723	0.00179166		10.7003	0.00392175		3.85524	0.0042663		46.0731	0.00378831			12	12		12	12
																										58.8161	0.00473894		16.1887	0.004423		9.29903	0.00169829		11.166	0.00392251		3.98867	0.00430494		46.6193	0.00383245			12	12		12	12
																										59.6104	0.00478111		15.7269	0.00435339		9.60861	0.00169096		12.054	0.00389776		3.82289	0.00431671		45.5779	0.00382021			12	12		12	12
																										65.4638	0.00492007		16.4872	0.0043173		9.09887	0.00170926		12.6466	0.00395801		4.02102	0.00428071		46.6917	0.00395959			12	12		12	12
																										71.6831	0.00508473		15.2456	0.00428033		8.86006	0.00179363		14.1533	0.0039108		3.58266	0.00426365		48.3274	0.00416455			12	12		12	12
																										84.8447	0.00524176		15.6971	0.00421684		8.4514	0.0019143		15.7794	0.00388589		3.3764	0.00419135		55.2803	0.004258			12	12		12	12
																										87.1314	0.00545304		17.2366	0.00411767		8.05002	0.00196096		17.8606	0.0037797		3.11196	0.00407037		56.6389	0.00432623			12	12		12	12
																										90.8586	0.00548999		18.4368	0.0040425		7.51977	0.00197324		18.4878	0.0036811		2.93269	0.00398555		56.9944	0.00427966			12	12		12	12
																										92.0196	0.00542762		18.3788	0.00407146		6.9541	0.00197737		19.2962	0.00361361		3.99956	0.00395861		54.4531	0.00417931			12	12		12	12
																										90.1814	0.00522984		19.1502	0.00397561		6.90194	0.00195509		19.2871	0.00369683		4.40778	0.00399074		57.5897	0.0042148			12	12		12	12
																										86.4733	0.00522938		21.229	0.00396683		7.09193	0.00195567		17.7252	0.00367013		4.31415	0.00405167		62.1946	0.00428049			12	12		12	12
																										88.0173	0.00533945		23.3228	0.00401789		7.40292	0.00202737		17.8474	0.003707		4.63794	0.00401337		69.2262	0.00423348			12	12		12	12
																										91.7177	0.00528044		23.4811	0.00404584		6.67269	0.00205961		18.1127	0.0036416		4.68216	0.0040382		74.6759	0.00431331			12	12		12	12
																										92.4476	0.00546477		23.7128	0.00402472		7.26341	0.00205878		18.9631	0.00358226		4.41678	0.00399212		72.1228	0.00429629			12	12		12	12
																										94.3081	0.00549385		22.8565	0.00396181		7.34976	0.0020619		19.2038	0.00354342		4.25909	0.00385965		77.9191	0.00432698			12	12		12	12
																										95.9548	0.00558423		22.6569	0.00390257		7.33994	0.00206688		18.1831	0.00348433		4.34718	0.0037839		84.9197	0.00443797			12	12		12	12
																										99.8488	0.00563952		21.4944	0.00395669		7.1335	0.00204282		18.3616	0.0034578		5.39945	0.00377161		87.0114	0.00449061			12	12		12	12
																										93.9078	0.00558479		20.9734	0.00393249		7.28706	0.0020585		17.9226	0.00343964		8.24636	0.00369571		90.2596	0.00456108			12	12		12	12
																										82.047	0.00533185		20.7223	0.00395895		7.17273	0.00200427		17.6535	0.00343899		8.98716	0.00373018		91.9804	0.0045365			12	12		12	12
																										77.8683	0.0051536		21.4252	0.00388549		7.30611	0.00198691		19.0978	0.00340363		8.9326	0.00368445		97.8783	0.00456462			12	12		12	12
																										73.6559	0.00519541		22.718	0.00393795		7.62038	0.00194223		20.1225	0.00328084		8.64947	0.00374148		100.567	0.00454722			12	12		12	12
																										76.4383	0.00522165		22.4963	0.00398542		6.91566	0.00188621		19.8132	0.00324307		8.75377	0.00376486		103.422	0.00444833			12	12		12	12
																										74.1283	0.00522401		21.7666	0.00406123		7.61284	0.00184521		19.8418	0.00317554		8.68742	0.00378064		105.822	0.00442018			12	12		12	12
																										66.1427	0.00506506		22.843	0.00404835		7.75403	0.00177443		19.2599	0.00318791		9.14256	0.00379986		107.605	0.00424764			12	12		12	12
																										53.2197	0.00491988		21.4514	0.00409152		7.79353	0.00166525		19.417	0.00317886		9.35308	0.00384748		107.002	0.00407399			12	12		12	12
																										51.2021	0.00479115		20.4657	0.00415408		7.46106	0.00154543		17.2268	0.00321956		9.42367	0.00386365		117.053	0.00405435			12	12		12	12
																										47.1313	0.00469029		19.4404	0.00418881		7.03895	0.00150298		17.5714	0.00320445		9.43331	0.00393232		129.973	0.0040575			12	12		12	12
																										45.0805	0.00469507		20.0994	0.00415507		7.68351	0.00147814		19.3892	0.00318595		8.05789	0.00400425		135.54	0.00408032			12	12		12	12
																										43.8119	0.00480788		20.2797	0.0042287		8.84555	0.00147272		19.3126	0.00323006		7.55655	0.00398539		130.522	0.00400795			12	12		12	12
																										40.1579	0.00482164		18.949	0.00435522		12.3404	0.00151433		19.6835	0.00323989		7.96167	0.0039548		125.149	0.00389271			12	12		12	12
																										40.3257	0.00484331		18.5925	0.0042557		13.2289	0.00152881		19.0738	0.00325919		8.19098	0.00403525		119.304	0.00387138			12	12		12	12
																										37.8023	0.0047321		18.9337	0.00429578		12.9064	0.00146577		18.4541	0.003199		9.0796	0.00417258		113.793	0.00386482			12	12		12	12
																										42.1195	0.0126968		32.25	0.0107881		7.98488	0.0053274		18.8828	0.0135911		10.5831	0.0115828		103.826	0.0111958			16	16		16	16
																										42.4796	0.0122879		34.6945	0.0106019		7.48344	0.0052163		20.3542	0.0135129		10.7711	0.0115776		129.36	0.0112124			16	16		16	16
																										43.0402	0.0118335		35.3302	0.0103706		7.69969	0.00523738		20.3723	0.0134211		10.8779	0.0114744		136.152	0.011318			16	16		16	16
																										43.012	0.0114492		34.3259	0.0101659		6.90873	0.00527568		20.2633	0.0135712		11.2993	0.0112034		137.522	0.0112481			16	16		16	16
																										41.7551	0.0112103		32.1425	0.0101418		6.76118	0.00532324		17.8727	0.0138544		11.0219	0.0110355		137.974	0.0116279			16	16		16	16
																										40.1799	0.0111166		30.482	0.0102823		6.81117	0.00529334		16.8586	0.0137887		10.9492	0.010657		132.514	0.0117632			16	16		16	16
																										38.3294	0.0109285		32.0459	0.0104551		7.04215	0.00534701		15.9577	0.0136565		10.9652	0.0102322		133.127	0.0117419			16	16		16	16
																										37.4948	0.010805		34.4213	0.0103206		7.57794	0.00538747		17.9808	0.0138972		10.7967	0.0096703		134.261	0.0116505			16	16		16	16
																										42.2464	0.0110299		36.087	0.0102219		6.49216	0.00556025		18.0778	0.0138867		7.98265	0.00929903		128.575	0.0116845			16	16		16	16
																										43.845	0.0112899		34.5984	0.0102395		5.98455	0.00582239		16.763	0.0137435		4.34719	0.00902506		124.871	0.0115395			16	16		16	16
																										44.7642	0.0113776		35.2726	0.0104693		5.9126	0.00605472		16.8946	0.0136291		3.64071	0.00885569		122.728	0.0114398			16	16		16	16
																										49.8352	0.0113936		35.3999	0.0110128		5.83412	0.00605395		16.5871	0.0135215		3.66557	0.00858514		125.121	0.0113448			16	16		16	16
																										55.171	0.0113613		35.5253	0.0111393		5.77329	0.00599364		19.1951	0.0131698		3.7363	0.00824985		116.875	0.0114165			16	16		16	16
																										61.2443	0.011574		34.916	0.0111413		5.7284	0.00596377		21.0279	0.0128595		3.58101	0.00820677		112.617	0.0114661			16	16		16	16
																										59.8188	0.0116073		35.3866	0.0111375		8.97441	0.00604794		24.0535	0.0125718		3.53307	0.00814205		100.173	0.0115319			16	16		16	16
																										65.0431	0.0115772		37.0286	0.0111134		13.3754	0.00609784		23.7526	0.0124393		3.258	0.00808376		102.627	0.0115838			16	16		16	16
																										61.1669	0.0115143		42.0741	0.0110755		14.002	0.00608904		21.896	0.0121783		3.27345	0.00805176		83.3845	0.0113782			16	16		16	16
																										56.5339	0.0113935		42.7796	0.0109478		13.9592	0.0060531		21.654	0.0121869		3.17915	0.00798833		71.6965	0.0111565			16	16		16	16
																										56.0443	0.0111193		41.3196	0.0111061		14.6183	0.00591918		21.1264	0.0121251		3.29403	0.00796243		70.9302	0.0109108			16	16		16	16
																										53.8417	0.0111305		41.3501	0.0110056		14.8955	0.00590955		20.0943	0.0120312		2.83888	0.0080282		71.2838	0.0108665			16	16		16	16
																										53.5321	0.0114512		38.0773	0.0109898		14.8672	0.00604212		18.4953	0.0118994		2.84768	0.00813083		50.4271	0.0109593			16	16		16	16
																										53.6127	0.0116783		36.2606	0.0110311		14.8259	0.00613778		18.2553	0.0117931		3.47615	0.00819252		44.805	0.011011			16	16		16	16
																										54.2393	0.0117623		34.9387	0.0110506		15.1736	0.00613762		19.0927	0.0115821		3.3382	0.00847686		44.6262	0.0108964			16	16		16	16
																										54.6764	0.0119059		33.9227	0.010972		15.9491	0.00611464		18.9744	0.0112593		3.67052	0.00889895		44.8461	0.0107088			16	16		16	16
																										54.6951	0.0119916		34.4992	0.0109367		15.7746	0.00608539		19.5255	0.0109425		3.65761	0.00914969		47.4865	0.0105975			16	16		16	16
																										56.0118	0.0121731		32.3522	0.010852		14.4596	0.00612201		21.955	0.0109861		4.11676	0.0093995		49.3966	0.0105377			16	16		16	16
																										52.066	0.0123316		31.0957	0.0108977		14.2167	0.00608896		22.8796	0.0109371		4.14601	0.00976243		47.4686	0.0105521			16	16		16	16
																										47.9509	0.0124221		30.3126	0.0109733		14.5744	0.00607687		23.3787	0.0109658		4.48965	0.0101203		47.4436	0.0104526			16	16		16	16
																										46.7418	0.0124286		33.544	0.010641		15.5045	0.00600057		23.7346	0.0109907		4.72676	0.0104715		48.7244	0.0103982			16	16		16	16
																										45.3259	0.0124402		35.3459	0.0104633		16.2509	0.00596008		21.6422	0.0111004		4.67265	0.0107154		51.2979	0.010357			16	16		16	16
																										38.8726	0.0124839		35.4038	0.0100668		16.833	0.00591401		21.7184	0.0112094		4.78537	0.0109807		50.3399	0.0104931			16	16		16	16
																										32.8667	0.0123956		34.2087	0.0100144		17.5243	0.00604182		19.1114	0.0112335		5.58022	0.0111727		49.8611	0.0106439			16	16		16	16
																										26.1397	0.0124726		33.8285	0.0100417		18.9	0.00610473		17.0019	0.0112003		6.03715	0.0114218		50.3534	0.0108003			16	16		16	16
																										25.2708	0.0124789		32.47	0.0102628		15.9966	0.00612296		14.0195	0.0112437		7.07879	0.0116513		49.8635	0.0111051			16	16		16	16
																										16.8912	0.0127089		31.719	0.0102621		11.7389	0.00602787		14.1323	0.0112591		7.68016	0.0119649		53.4649	0.0113339			16	16		16	16
																										13.5808	0.0130076		26.9306	0.010268		11.2405	0.00600434		14.5444	0.0114581		7.98587	0.0121025		63.2934	0.0117107			16	16		16	16
																										14.1956	0.0133094		26.9676	0.0103327		11.5017	0.00600505		14.6995	0.0114122		8.09733	0.012479		61.4121	0.0118863			16	16		16	16
																										14.647	0.0135493		28.188	0.0103351		9.70236	0.00613513		16.4784	0.0114477		8.30403	0.0126299		62.2727	0.0121171			16	16		16	16
																										19.1206	0.0138045		27.97	0.0103914		9.81146	0.00613695		16.8687	0.0118016		9.15048	0.012654		59.0475	0.0123876			16	16		16	16
																										23.5214	0.0136063		28.9911	0.0108908		10.2806	0.00607877		17.7378	0.0120018		9.63445	0.0128275		56.3649	0.0124381			16	16		16	16
																										21.9369	0.0133849		29.2397	0.0111351		11.1576	0.0059877		17.5277	0.0120541		9.41389	0.0129764		55.7864	0.0126313			16	16		16	16
																										24.0519	0.0131977		28.3664	0.0112685		11.5285	0.0058793		16.8758	0.0121875		9.99487	0.0129114		58.7369	0.012912			16	16		16	16
																										32.3672	0.0128589		27.3418	0.0115823		11.6347	0.00583323		17.1577	0.0122204		10.0147	0.0129519		62.8688	0.0134866			16	16		16	16
																										36.1664	0.012553		25.883	0.0119667		11.6404	0.00590283		16.7074	0.0124313		11.2564	0.012974		67.0618	0.0139235			16	16		16	16
																										36.3491	0.0123032		25.4045	0.012109		14.8309	0.00590751		15.6733	0.0124186		12.8458	0.0130541		70.6795	0.0138717			16	16		16	16
																										36.0186	0.0121179		24.9709	0.0120017		15.1254	0.00587514		13.7584	0.0120918		14.8563	0.0131422		72.3827	0.0138185			16	16		16	16
																										36.0799	0.0120514		26.0285	0.0118603		14.8266	0.00583944		13.5658	0.0115237		16.2515	0.0132534		73.8796	0.0136796			16	16		16	16
																										40.4485	0.0119768		23.0559	0.0120151		13.9424	0.00580609		12.9568	0.0114735		18.1251	0.013435		76.8403	0.0136121			16	16		16	16
																										42.9082	0.0118314		20.3234	0.0121134		13.2755	0.00569033		13.0821	0.0113997		21.2249	0.0134533		76.6596	0.0134933			16	16		16	16
																										43.8797	0.011759		20.6803	0.012083		12.8335	0.00562379		12.5582	0.0113083		22.849	0.0134647		73.9773	0.0135279			16	16		16	16
																										46.5777	0.011708		21.5983	0.0119009		12.643	0.00557494		13.1719	0.0110886		23.5779	0.0134982		73.1408	0.0132743			16	16		16	16
																										46.3841	0.011752		21.4997	0.0117761		11.3644	0.00563232		13.6632	0.0111347		24.5338	0.013609		74.4572	0.0130589			16	16		16	16
																										46.3762	0.0116504		21.2973	0.0119413		11.3229	0.00570885		13.8513	0.0111831		24.48	0.0136466		72.2459	0.0127364			16	16		16	16
																										48.3505	0.011599		19.9404	0.0119516		11.2594	0.00563474		13.6499	0.0112307		24.383	0.013788		65.8637	0.0123978			16	16		16	16
																										57.4697	0.0114386		19.1591	0.01226		11.1162	0.00567272		16.7288	0.0112499		25.3398	0.0139291		58.5591	0.0120242			16	16		16	16
																										63.8903	0.0113684		18.3358	0.012458		12.1905	0.00570246		22.4275	0.0115024		26.5934	0.0137947		59.4723	0.0119143			16	16		16	16
																										62.6131	0.0112782		18.0922	0.012565		13.1612	0.00556223		21.1353	0.0120102		27.8035	0.0135766		59.6092	0.0119216			16	16		16	16
																										59.3891	0.0111021		18.6384	0.0125746		12.7271	0.00551321		20.8534	0.0121398		28.0188	0.0135937		58.0846	0.0118466			16	16		16	16
																										58.824	0.0110906		17.4182	0.0124384		12.8733	0.00556424		20.2028	0.0119578		28.8256	0.0135758		59.9967	0.011767			16	16		16	16
																										65.264	0.0110416		16.4909	0.0122913		11.8182	0.00568627		21.9467	0.0119851		30.2806	0.0134493		68.7542	0.0117183			16	16		16	16
																										43.1115	0.0269569		45.7462	0.0301672		10.0721	0.0154911		13.3574	0.0265007		5.31944	0.0265031		23.846	0.0287487			20	20		20	20
																										44.0529	0.0269909		44.6036	0.0296357		9.56772	0.0154509		13.2516	0.0270007		5.18792	0.0262684		21.8654	0.0286787			20	20		20	20
																										46.0868	0.0270781		46.8524	0.0296711		8.31645	0.0154232		13.4811	0.0275132		5.53992	0.0264069		26.1215	0.0286539			20	20		20	20
																										63.746	0.0272741		49.7317	0.029281		8.34557	0.0153589		13.5143	0.0284618		5.60511	0.0266096		24.9995	0.0283162			20	20		20	20
																										72.1514	0.0274255		48.0197	0.029399		8.42376	0.0156076		14.2567	0.0293721		5.52204	0.0271159		25.2393	0.0281365			20	20		20	20
																										82	0.027538		48.2397	0.0292443		8.95564	0.0158562		13.6144	0.030056		5.47185	0.0271934		24.9572	0.0274206			20	20		20	20
																										102.805	0.0275243		48.9505	0.0295902		8.34236	0.0161417		13.1753	0.0310083		4.75385	0.0274172		24.0961	0.0270503			20	20		20	20
																										106.421	0.0273478		50.5654	0.0296966		9.31421	0.0164469		12.9043	0.031599		4.36805	0.027325		25.0039	0.0264988			20	20		20	20
																										103.796	0.0269437		51.2994	0.0295642		9.97196	0.0167125		12.8084	0.031641		4.08627	0.027556		24.4502	0.0261521			20	20		20	20
																										126.351	0.0267957		51.5937	0.0290939		10.0872	0.0169772		12.8042	0.0319042		3.62926	0.0275815		24.1832	0.0257909			20	20		20	20
																										131.097	0.0267552		51.5995	0.0285817		11.0854	0.0172417		12.1667	0.0318088		3.18818	0.0276938		21.7272	0.0254877			20	20		20	20
																										131.108	0.0268431		50.864	0.028221		10.913	0.0176837		11.8388	0.0317742		3.48838	0.027787		20.6367	0.0256243			20	20		20	20
																										131.129	0.0269242		50.6492	0.0281051		10.6808	0.0180782		12.0366	0.0322209		3.47194	0.0275925		21.4435	0.0259505			20	20		20	20
																										131.603	0.0268739		50.2272	0.0275859		9.80766	0.0182699		13.5076	0.0327357		3.44468	0.0274347		23.1618	0.0256711			20	20		20	20
																										132.473	0.0269749		51.4614	0.0271554		7.45146	0.018612		13.3222	0.0334104		3.31896	0.0272808		30.3919	0.0254586			20	20		20	20
																										129.701	0.0269812		49.1436	0.0265939		6.18621	0.0189404		12.3645	0.0338355		3.0444	0.0271768		33.2581	0.0257508			20	20		20	20
																										130.039	0.0271982		46.4514	0.0263097		6.08104	0.0193549		12.2036	0.0338577		3.17449	0.0274049		34.5401	0.0259081			20	20		20	20
																										129.556	0.0272928		43.0468	0.0256688		5.55689	0.0196662		11.372	0.0337433		3.21708	0.0274481		33.5077	0.0259145			20	20		20	20
																										127.896	0.0274674		38.8893	0.0253193		5.87663	0.0199654		12.3256	0.0341043		3.36334	0.0274076		35.5376	0.0257022			20	20		20	20
																										128.722	0.0275899		33.095	0.0250171		6.048	0.0202323		12.5032	0.0341724		3.26567	0.0273854		38.0396	0.025815			20	20		20	20
																										126.832	0.0277533		31.7505	0.0250924		6.17329	0.0205736		12.9318	0.0343506		3.4482	0.0270718		39.8735	0.0256034			20	20		20	20
																										128.892	0.0277872		29.0631	0.0254143		6.74295	0.0207576		12.9263	0.0342104		3.26537	0.0269807		35.8558	0.0252047			20	20		20	20
																										111.55	0.0277635		26.2128	0.0246946		7.24221	0.0209361		13.1992	0.0337734		3.23528	0.0265821		35.8147	0.0248519			20	20		20	20
																										103.808	0.0277104		25.7877	0.0250946		7.63511	0.0212217		12.8081	0.0331722		3.26807	0.0261146		36.0547	0.0244142			20	20		20	20
																										93.1945	0.0275484		25.3926	0.025904		7.38298	0.0210033		12.9201	0.0333144		3.44486	0.0257423		39.6431	0.0243895			20	20		20	20
																										79.2896	0.0276241		26.3806	0.026415		7.72833	0.0210149		12.8843	0.0327588		3.52847	0.025701		40.6294	0.0245243			20	20		20	20
																										79.9078	0.0276244		29.8865	0.0267285		6.97865	0.0211227		12.8294	0.0316144		3.48964	0.0261941		39.4255	0.0244683			20	20		20	20
																										81.388	0.0276068		27.7826	0.026705		7.5939	0.0215824		12.8351	0.0311202		3.51465	0.0265386		40.426	0.0244359			20	20		20	20
																										65.1663	0.0277313		26.729	0.0265586		8.67349	0.0215962		13.7244	0.0311301		3.50859	0.0264602		41.2929	0.0244133			20	20		20	20
																										61.0104	0.0274983		26.9399	0.026725		8.31891	0.0215606		14.2793	0.0310818		3.46772	0.0263454		43.5365	0.0245979			20	20		20	20
																										85.2716	0.0272471		26.2162	0.0267033		8.64208	0.0215012		14.4145	0.0317398		2.88989	0.0264177		44.668	0.0242712			20	20		20	20
																										103.031	0.0272508		25.0558	0.026764		9.47701	0.0213776		13.6632	0.0320474		2.73977	0.0267812		45.3075	0.0237436			20	20		20	20
																										125.402	0.027044		25.03	0.0271077		9.89029	0.0215261		12.2976	0.0318755		2.61721	0.0273965		51.2679	0.023737			20	20		20	20
																										173.646	0.0267665		23.478	0.0273622		11.1893	0.021611		12.4186	0.0319751		2.528	0.0278769		66.1169	0.0242982			20	20		20	20
																										218.614	0.0265316		22.8085	0.0271884		11.4414	0.0216313		12.597	0.0317326		2.57173	0.028229		94.8045	0.0243434			20	20		20	20
																										255.865	0.0263596		22.9744	0.0276701		12.3595	0.021411		13.0339	0.0310233		2.52589	0.0281337		118.713	0.0245515			20	20		20	20
																										303.085	0.0260216		23.2453	0.0281912		13.8892	0.021141		12.7586	0.0305243		2.56943	0.0283619		137.203	0.0247353			20	20		20	20
																										354.339	0.0258528		23.1522	0.0286347		14.0974	0.0212564		11.4699	0.0300356		2.72072	0.0286133		153.929	0.0252686			20	20		20	20
																										381.601	0.0257028		22.5602	0.0290978		14.5399	0.0213391		10.8947	0.0294912		2.5851	0.0289305		154.537	0.0252846			20	20		20	20
																										406.388	0.0255588		23.6934	0.0292833		14.8245	0.0211702		10.4779	0.0284232		2.43393	0.0293681		154.711	0.0251054			20	20		20	20
																										403.06	0.0255024		25.0923	0.0294608		15.7233	0.0211732		9.95189	0.0284144		2.50969	0.0296569		167.782	0.0257679			20	20		20	20
																										407.32	0.0256542		25.2101	0.0295824		17.6964	0.0214964		10.0555	0.0288478		2.7822	0.0297726		188.757	0.0264484			20	20		20	20
																										418.79	0.0257295		26.8691	0.0303135		19.6659	0.0216197		9.7999	0.0295362		3.05572	0.0298016		194.475	0.0269246			20	20		20	20
																										423.457	0.0258377		25.9834	0.029994		20.6156	0.0214267		10.223	0.0292095		2.84537	0.0299855		192.052	0.0269671			20	20		20	20
																										422.741	0.0260927		24.1857	0.0293246		22.1405	0.0212413		9.55381	0.0288656		2.98608	0.0299415		200.72	0.0271865			20	20		20	20
																										413.758	0.0259993		19.0266	0.0288668		22.268	0.0210455		10.2576	0.0289377		2.87241	0.0297473		216.193	0.0272003			20	20		20	20
																										413.664	0.0258558		19.0832	0.0287925		22.4096	0.021115		10.9675	0.0291324		2.80368	0.0291652		217.025	0.0271483			20	20		20	20
																										407.093	0.0258681		18.315	0.0292669		22.6911	0.0209298		11.8953	0.0292205		3.07028	0.0288646		220.309	0.0270952			20	20		20	20
																										412.937	0.0259543		15.8042	0.0291576		22.2932	0.0209628		12.616	0.0297106		3.64582	0.0286655		220.749	0.0270286			20	20		20	20
																										398.689	0.0262891		15.8899	0.0296668		22.348	0.02094		12.3651	0.0305927		4.29962	0.0283799		220.17	0.0269857			20	20		20	20
																										384.324	0.0260178		17.3373	0.0297861		23.1518	0.0208743		13.0965	0.0309814		4.63201	0.0281728		220.995	0.0271825			20	20		20	20
																										368.534	0.0259602		18.9658	0.02956		24.219	0.0208226		13.0492	0.0311188		4.61766	0.0273821		212.618	0.0273967			20	20		20	20
																										353.577	0.0262717		19.0249	0.0289662		23.1101	0.0205151		13.6935	0.0313968		4.69876	0.0270725		191.615	0.0269835			20	20		20	20
																										335.342	0.0265578		19.5904	0.0289611		22.9573	0.0203459		14.3749	0.0315085		4.6705	0.0264994		177.169	0.0270695			20	20		20	20
																										305.575	0.0267067		18.8748	0.0290951		22.3635	0.0199614		14.6519	0.0316812		4.94625	0.0263287		151.572	0.026926			20	20		20	20
																										265.83	0.026915		18.5322	0.0287249		21.15	0.0198352		14.4251	0.0320504		5.47487	0.0261095		135.631	0.0268911			20	20		20	20
																										216.126	0.0269891		17.9287	0.0285215		20.6171	0.0196984		13.9245	0.0324929		5.73931	0.0257835		121.385	0.0265566			20	20		20	20
																										187.108	0.0269168		17.8585	0.028717		19.9448	0.0196193		13.5344	0.0333089		5.9132	0.0260159		120	0.0264869			20	20		20	20
																										168.559	0.0268854		18.2836	0.028665		20.2455	0.0195413		13.595	0.0346459		5.87025	0.0259417		118.185	0.0262498			20	20		20	20
																										170.052	0.0269348		16.8519	0.0284858		18.7889	0.0198095		13.7414	0.0351842		5.82382	0.0257631		102.531	0.025974			20	20		20	20
																										41.6635	0.00811529		10.5946	0.0100464		21.4215	0.00375328		31.5524	0.00764213		5.95966	0.00808567		34.2619	0.00700636			15	15		15	15
																										40.926	0.00802069		9.42778	0.00989291		21.3818	0.00375178		31.1735	0.00754865		5.96567	0.00803641		35.1804	0.00700949			15	15		15	15
																										37.4725	0.00796442		9.94129	0.00944398		20.9976	0.00371296		27.97	0.00738261		5.93894	0.00779721		36.9683	0.00702818			15	15		15	15
																										26.8693	0.00779773		9.48194	0.00914871		20.4706	0.00362869		25.0797	0.00727426		5.68784	0.00764311		36.8605	0.00715361			15	15		15	15
																										22.363	0.00760307		10.2046	0.00888842		21.0691	0.00362045		24.7214	0.00720778		5.34707	0.00743144		38.5926	0.00727662			15	15		15	15
																										17.2466	0.00755625		12.3812	0.00864538		19.8224	0.00364191		23.6592	0.00719421		5.49581	0.0072371		38.5935	0.00738192			15	15		15	15
																										17.9926	0.00746227		13.8769	0.00837157		18.5565	0.00362947		21.5597	0.00719718		5.47292	0.00717349		38.5548	0.00760648			15	15		15	15
																										21.4374	0.00750713		13.6019	0.00830235		18.5505	0.00361874		20.3507	0.00713273		4.62879	0.00704503		38.6201	0.00776273			15	15		15	15
																										27.928	0.00757367		13.5609	0.00824801		17.9487	0.00361699		21.125	0.00708749		3.10008	0.00705844		39.0666	0.00787646			15	15		15	15
																										39.4474	0.00777586		12.7576	0.00809586		18.5434	0.00357573		22.0502	0.00714699		2.93432	0.00725686		37.7837	0.00793518			15	15		15	15
																										41.8017	0.00801215		13.096	0.0077279		16.1439	0.00355134		20.956	0.00714389		3.2596	0.0072452		35.616	0.00791977			15	15		15	15
																										46.8154	0.00835299		13.3144	0.00744905		15.7237	0.00354791		20.4171	0.00712026		3.26658	0.00741174		36.1592	0.00787062			15	15		15	15
																										50.2071	0.00854453		13.6751	0.00726855		16.0825	0.0035816		22.2594	0.00717496		3.07806	0.00767029		34.6035	0.00774686			15	15		15	15
																										56.1887	0.00860834		13.049	0.00728841		16.4217	0.00357994		22.6532	0.00759856		3.31398	0.00765461		32.2268	0.00770632			15	15		15	15
																										55.7293	0.00866712		14.9676	0.00716115		15.8032	0.00357832		21.7117	0.00768594		3.55219	0.00773637		29.57	0.00780085			15	15		15	15
																										60.4037	0.00894056		17.1441	0.00711377		16.4144	0.00363997		18.1673	0.00761001		4.00321	0.00789271		28.6909	0.00788719			15	15		15	15
																										62.8712	0.00909124		18.9407	0.00731582		17.0285	0.00362698		15.0478	0.00757129		3.96707	0.00821467		29.22	0.00796301			15	15		15	15
																										71.7935	0.00904764		20.1238	0.00764679		17.6803	0.00366482		14.3398	0.00771123		3.96687	0.00856778		28.2424	0.00806265			15	15		15	15
																										73.1463	0.00903922		20.5853	0.00793257		17.3615	0.00377517		14.5153	0.00783906		3.9666	0.00898833		28.2824	0.00806446			15	15		15	15
																										70.5241	0.0092041		19.8696	0.00805703		17.6158	0.00378489		12.4002	0.00790371		4.92538	0.00923213		30.2079	0.00803046			15	15		15	15
																										71.2295	0.00922437		21.1774	0.00796071		19.8393	0.0038406		12.2789	0.00796652		4.8135	0.00945628		32.6043	0.0079475			15	15		15	15
																										73.4992	0.00930313		21.9076	0.00796567		22.0242	0.00392758		12.2114	0.00812843		4.63966	0.00978002		30.8496	0.00804699			15	15		15	15
																										78.9995	0.00967688		23.3657	0.00793638		22.8719	0.00405818		13.4813	0.0081594		4.835	0.0100956		30.482	0.00808737			15	15		15	15
																										82.1001	0.00999739		22.243	0.00771915		21.0609	0.00409649		14.5897	0.00830082		5.3225	0.0104771		28.5032	0.00806596			15	15		15	15
																										83.0302	0.00992193		19.9041	0.00772231		20.8704	0.0041247		14.5408	0.00826234		5.08321	0.0105138		30.3872	0.00800751			15	15		15	15
																										81.1594	0.00976821		20.5529	0.00770967		19.5635	0.00415013		15.9706	0.00834572		4.99602	0.0103815		29.5883	0.00789005			15	15		15	15
																										78.7581	0.00969062		20.9071	0.00777865		18.2246	0.00413958		18.5299	0.0085587		4.90088	0.0103106		29.1821	0.00788904			15	15		15	15
																										74.4354	0.00965643		21.6618	0.00775472		17.0844	0.00411658		18.0134	0.00868462		4.8839	0.0102296		29.3886	0.00795447			15	15		15	15
																										69.1881	0.0094344		21.6389	0.00778253		16.4951	0.00412148		17.2063	0.0087635		5.04588	0.0100853		30.2591	0.00810064			15	15		15	15
																										71.5113	0.0092928		22.4187	0.00786263		16.0816	0.00416708		18.6148	0.00880903		4.63702	0.00984853		35.2641	0.0082394			15	15		15	15
																										69.3283	0.00902903		21.7556	0.00806046		15.0547	0.00426394		19.2049	0.00919883		4.50136	0.00974589		36.0671	0.00846492			15	15		15	15
																										70.6848	0.00881316		21.4342	0.0080229		14.4472	0.0042652		17.985	0.00952627		4.41995	0.00951629		35.5178	0.00863223			15	15		15	15
																										67.0452	0.00884263		21.058	0.0079769		13.7615	0.00427387		18.0071	0.00951467		4.31546	0.00947901		37.901	0.00877851			15	15		15	15
																										67.1931	0.0089167		18.6775	0.00761812		13.2637	0.0043116		18.0471	0.00917385		4.1666	0.0093539		40.9731	0.0090233			15	15		15	15
																										62.3265	0.00905069		16.5488	0.00750488		12.6249	0.00429415		17.1402	0.00936642		3.63563	0.00910679		41.1599	0.00947442			15	15		15	15
																										58.5762	0.00874352		15.1233	0.00739071		12.5907	0.00430582		17.9958	0.00953551		3.65632	0.00886609		40.4597	0.00996515			15	15		15	15
																										50.0723	0.00877256		14.5248	0.00718999		12.4643	0.00434249		16.4656	0.0095847		3.68951	0.00856066		40.3349	0.0103727			15	15		15	15
																										46.8569	0.0088238		14.3106	0.00722528		11.4268	0.00424843		16.1386	0.00948274		3.60762	0.00827907		44.5759	0.0105996			15	15		15	15
																										47.5062	0.00889949		15.1211	0.00716683		11.0355	0.00419468		16.0106	0.00951875		3.31671	0.00815739		42.9129	0.0106785			15	15		15	15
																										47.1332	0.00905011		13.2898	0.00720256		8.94193	0.00418597		15.9784	0.00955691		3.70675	0.00813704		40.4557	0.0107693			15	15		15	15
																										45.7055	0.00919168		12.0924	0.0074183		9.42103	0.00418704		16.579	0.00956461		3.71583	0.00807675		40.2797	0.0108244			15	15		15	15
																										40.8818	0.00902343		10.2806	0.00755048		11.1495	0.00411177		15.6746	0.00948477		3.13981	0.00783658		42.917	0.0106908			15	15		15	15
																										37.2248	0.00888712		9.98377	0.00782799		12.4695	0.00412328		15.5592	0.00945527		2.88626	0.00754636		43.4749	0.0106108			15	15		15	15
																										36.7745	0.00890168		10.424	0.00795784		13.5497	0.00413282		16.4071	0.00933675		2.91733	0.00751979		42.8171	0.0106315			15	15		15	15
																										37.222	0.00893918		8.36452	0.00791864		15.2303	0.00418169		15.4109	0.00930851		3.60208	0.00779868		43.0658	0.0106351			15	15		15	15
																										37.3433	0.0089919		7.70781	0.00790349		16.3289	0.00422397		12.9022	0.00903991		4.33819	0.00791239		44.9078	0.0106899			15	15		15	15
																										35.858	0.00903075		6.80989	0.00795196		17.7563	0.0043136		12.7053	0.0089122		4.22721	0.00782866		45.0744	0.0106947			15	15		15	15
																										31.6669	0.0091343		7.77505	0.00802845		17.4384	0.00440284		12.7523	0.00888285		4.08625	0.00765948		43.032	0.0107404			15	15		15	15
																										27.5425	0.00934919		8.50592	0.00810046		19.7662	0.00444933		12.2095	0.00885067		4.10316	0.00772593		35.0654	0.0107225			15	15		15	15
																										24.8968	0.00933153		11.277	0.00808586		20.5011	0.00445626		12.487	0.0087504		4.24706	0.00788152		34.1997	0.010536			15	15		15	15
																										21.418	0.00944634		13.6284	0.00810478		21.418	0.00447705		11.6471	0.0082926		4.63031	0.00779438		33.1966	0.0104344			15	15		15	15
																										20.1578	0.0094382		14.9325	0.00805913		22.183	0.00452533		11.1974	0.00809042		4.65673	0.00779765		30.5402	0.0103185			15	15		15	15
																										21.3315	0.00942926		15.0591	0.00814857		22.2827	0.00452534		11.1902	0.00798297		4.51973	0.00799255		25.7712	0.0103674			15	15		15	15
																										21.4459	0.00941085		14.6606	0.00818796		22.6986	0.00453462		11.0128	0.00805315		4.53351	0.00834867		24.1849	0.0101395			15	15		15	15
																										27.4887	0.00952112		15.0232	0.00816361		21.6804	0.00447168		9.72865	0.00796426		4.61648	0.00869579		23.5973	0.00960272			15	15		15	15
																										33.1073	0.0093823		14.7948	0.00811896		21.0757	0.00444876		9.99873	0.00785254		4.58654	0.0091173		27.4551	0.00921831			15	15		15	15
																										35.5766	0.00931461		14.314	0.00800803		22.0025	0.00447286		9.67499	0.00771908		4.5542	0.0091856		34.0724	0.00891928			15	15		15	15
																										35.6315	0.0093463		13.6833	0.00777891		22.5395	0.00449329		8.86602	0.007701		4.03608	0.00940674		35.73	0.00870009			15	15		15	15
																										35.2617	0.00933987		13.7933	0.00765048		22.7928	0.00455167		9.25533	0.00772564		4.57967	0.00950441		36.0062	0.00864329			15	15		15	15
																										34.8349	0.00927506		14.3882	0.00777126		20.7246	0.00452523		10.3678	0.00772805		4.79957	0.00953243		36.9269	0.00876309			15	15		15	15
																										24.4632	0.00241916		9.33943	0.00239092		16.0543	0.000482782		22.6797	0.00425937		4.9312	0.00214248		40.2332	0.00192441			10	10		10	10
																										24.4054	0.00239678		11.4605	0.00239324		14.7633	0.000481046		21.7751	0.00455788		4.86934	0.00216979		38.4392	0.00193096			10	10		10	10
																										24.8188	0.00241549		12.1589	0.00236058		14.5283	0.000493826		21.8008	0.00479667		5.02247	0.00210578		44.0316	0.00189749			10	10		10	10
																										23.8919	0.00242415		12.7412	0.00218385		14.4884	0.000480145		22.8797	0.00492377		5.17952	0.00203933		46.8114	0.00184402			10	10		10	10
																										24.7262	0.00243829		13.034	0.00220179		13.7194	0.000469707		22.822	0.00506058		5.61226	0.00196007		53.0087	0.00183443			10	10		10	10
																										26.2486	0.00236324		13.7217	0.00218824		13.1234	0.000466647		22.9501	0.00507274		5.6081	0.00190791		56.8374	0.00193117			10	10		10	10
																										29.9953	0.00233717		14.8525	0.00219034		12.3623	0.000414683		22.6371	0.00505042		5.73519	0.00188728		60.7448	0.00193078			10	10		10	10
																										33.6263	0.00229559		14.0314	0.00222367		11.2834	0.000378182		22.7872	0.00517354		5.73837	0.00186241		63.9729	0.00189438			10	10		10	10
																										34.0595	0.00227596		14.6705	0.00220326		11.1644	0.000341371		22.5426	0.00518319		5.88942	0.00181647		63.7578	0.00184501			10	10		10	10
																										33.7543	0.00220142		14.5838	0.00215076		10.02	0.000353143		23.5362	0.00530707		6.09272	0.00187506		63.7153	0.001833			10	10		10	10
																										37.9219	0.00212638		14.7425	0.00213746		9.67024	0.000370124		23.5998	0.00543772		6.02834	0.00185327		61.3518	0.00193944			10	10		10	10
																										35.7174	0.00211393		15.2564	0.00216961		8.74828	0.000401732		22.8586	0.00548092		6.09995	0.00177597		63.0606	0.00197057			10	10		10	10
																										35.5054	0.00210918		15.5664	0.00223305		8.22549	0.000426893		19.8019	0.00540156		5.92527	0.00174305		62.4768	0.00199062			10	10		10	10
																										33.9645	0.00211932		15.3755	0.00229076		7.933	0.000451828		18.267	0.00525514		5.91733	0.00163982		62.6633	0.00200862			10	10		10	10
																										29.8774	0.00216307		14.5666	0.00229086		7.85206	0.000474117		17.8647	0.00507674		5.8666	0.00162475		57.6906	0.00202611			10	10		10	10
																										29.7197	0.0022011		14.8002	0.00233428		7.26014	0.000493974		17.8665	0.00500995		5.72383	0.00161088		51.5522	0.00208295			10	10		10	10
																										29.094	0.00220381		14.1448	0.00234165		7.60194	0.000543481		18.004	0.00477073		5.86436	0.0015411		53.6703	0.00211726			10	10		10	10
																										29.2191	0.00212005		13.8374	0.00233		6.5549	0.000611865		15.6823	0.00450636		5.79661	0.00151188		59.8926	0.00214465			10	10		10	10
																										32.2972	0.0021132		13.4628	0.00233058		6.71496	0.00069362		13.4515	0.00417739		4.25641	0.00150279		60.4399	0.0020812			10	10		10	10
																										31.9039	0.00207024		13.1128	0.00233681		6.86393	0.000786473		11.9796	0.00389681		3.31443	0.00146282		58.643	0.0020602			10	10		10	10
																										33.5568	0.00211253		11.0547	0.00232995		7.19838	0.000862131		10.7156	0.00352482		3.2613	0.00145396		59.1626	0.00210144			10	10		10	10
																										35.3044	0.00217277		11.5352	0.00232048		7.31521	0.000920519		9.10183	0.00318254		3.21677	0.00144212		52.4585	0.00213314			10	10		10	10
																										38.7968	0.00216658		10.5517	0.00231231		7.53779	0.000962285		7.01986	0.00306254		2.76636	0.00143325		44.6237	0.00213914			10	10		10	10
																										39.6607	0.00214179		9.74594	0.00222761		7.69816	0.00101712		6.98514	0.00279		2.31245	0.00143721		39.4526	0.00217812			10	10		10	10
																										39.031	0.00218285		8.6149	0.00220277		7.83722	0.00106899		7.73818	0.00255139		2.4097	0.00150363		39.5759	0.00218667			10	10		10	10
																										35.8882	0.00217559		7.35566	0.00220419		8.06751	0.00109181		9.21462	0.00228774		2.41046	0.00156079		35.6111	0.00226392			10	10		10	10
																										32.7522	0.00208511		7.49382	0.00216028		8.1584	0.00112595		9.83701	0.0020465		2.68098	0.00158325		31.5787	0.00239869			10	10		10	10
																										32.025	0.00208552		6.63835	0.00208753		8.573	0.00116715		10.4558	0.00187326		2.72414	0.00157172		32.1728	0.00245968			10	10		10	10
																										32.3736	0.0020594		6.56049	0.00210219		8.96715	0.00119478		10.2141	0.00171185		2.81043	0.00157849		36.0531	0.0025917			10	10		10	10
																										28.3484	0.00208454		6.69374	0.00210072		8.0272	0.00121519		10.1681	0.0015552		2.6476	0.0015968		36.8426	0.0026217			10	10		10	10
																										29.0328	0.00206582		6.08554	0.00207169		6.72554	0.00119051		10.7837	0.00144402		2.42728	0.00167678		32.7719	0.00258237			10	10		10	10
																										31.7842	0.00201011		6.46682	0.00204942		6.21472	0.00118227		11.1451	0.0014398		2.40065	0.00174062		33.2508	0.00254304			10	10		10	10
																										32.1277	0.00194561		6.78462	0.00192404		6.23919	0.00117468		10.3125	0.00140299		2.61986	0.00179642		38.1651	0.00254449			10	10		10	10
																										33.1919	0.00194738		6.87661	0.00194265		5.69477	0.00118471		12.5347	0.00145543		2.81128	0.00189404		36.3014	0.00254945			10	10		10	10
																										36.3768	0.00200004		6.95062	0.00193555		6.21568	0.00119591		12.5988	0.0014696		2.77807	0.00194768		36.8209	0.00258699			10	10		10	10
																										36.054	0.00207174		7.37796	0.00188395		7.3529	0.00117231		12.5303	0.00148447		2.48719	0.00199223		36.9622	0.00260467			10	10		10	10
																										35.0545	0.0020849		7.35866	0.00190122		8.80479	0.00114497		12.6362	0.00156364		2.48181	0.00207654		31.3377	0.00265387			10	10		10	10
																										33.0333	0.00211172		7.36016	0.00183432		10.4063	0.0011092		12.8016	0.00161634		2.47134	0.00208968		34.8798	0.00271598			10	10		10	10
																										34.7376	0.00209219		7.13866	0.00180152		10.6028	0.00104975		12.3668	0.00179724		2.53429	0.00219676		35.8265	0.0027728			10	10		10	10
																										34.0267	0.00206567		6.99689	0.00189008		10.2844	0.000967122		12.4483	0.00192453		2.78882	0.00223471		36.8866	0.00284064			10	10		10	10
																										34.0285	0.00207895		5.94339	0.00197342		10.5201	0.000893661		12.3326	0.00212001		3.12585	0.00221068		44.7482	0.00289645			10	10		10	10
																										29.7457	0.0020321		6.02669	0.00202934		10.2571	0.000838576		12.1769	0.00229198		3.25634	0.00222366		47.6559	0.00294589			10	10		10	10
																										27.4553	0.00197961		6.07854	0.0021041		10.2172	0.000792666		12.2875	0.00243186		3.34257	0.00217397		48.2916	0.00296773			10	10		10	10
																										28.2007	0.00201112		5.08595	0.00211145		10.7663	0.000735046		11.5755	0.00259275		3.31254	0.00213856		44.623	0.00301075			10	10		10	10
																										28.4196	0.00201581		5.16742	0.0021409		11.4413	0.000706058		10.0507	0.00272159		3.82622	0.00219945		46.4048	0.00295401			10	10		10	10
																										27.6243	0.00203291		5.17868	0.00214619		12.4405	0.0006738		9.69811	0.00289674		3.64618	0.00221282		45.9698	0.00284301			10	10		10	10
																										28.0456	0.0020565		5.35989	0.0021727		12.1136	0.000639845		8.96971	0.00300226		3.44915	0.00232011		47.4102	0.00283388			10	10		10	10
																										27.4778	0.00207109		5.83013	0.00219109		11.771	0.000630547		8.61385	0.00304474		3.37025	0.00238636		43.4284	0.00276994			10	10		10	10
																										30.2261	0.00210491		5.82538	0.00219609		11.8909	0.000598504		9.47752	0.00309815		3.46035	0.00239272		44.3798	0.00269461			10	10		10	10
																										28.9636	0.00212006		5.73718	0.00219496		11.4967	0.000596847		9.93696	0.00312952		3.60799	0.00248015		44.0228	0.00272507			10	10		10	10
																										26.618	0.00220007		4.96654	0.00219445		11.8302	0.000578031		10.6176	0.00316067		3.58961	0.00246294		49.817	0.00276293			10	10		10	10
																										29.9313	0.00229814		4.54621	0.00219597		12.1193	0.000553867		10.6769	0.00316829		3.49619	0.00244624		46.9414	0.00271691			10	10		10	10
																										31.206	0.00231717		5.02125	0.00224542		12.7217	0.000504885		8.66935	0.00321852		3.36028	0.00239008		47.5491	0.00272421			10	10		10	10
																										28.7076	0.00227073		4.41936	0.00225432		12.5671	0.000466763		8.82846	0.0031875		3.4551	0.00236306		47.698	0.00272517			10	10		10	10
																										32.2751	0.00219645		4.17492	0.00219878		11.2474	0.000436066		8.6609	0.00321561		3.24749	0.00237012		45.4422	0.00268858			10	10		10	10
																										35.2702	0.00213104		4.3656	0.00223515		9.99549	0.000420084		9.74163	0.0032123		3.11907	0.00241961		44.5062	0.00282926			10	10		10	10
																										34.2599	0.00207388		4.53862	0.00229322		8.33213	0.000402722		10.3857	0.00319019		3.3259	0.00243609		40.9243	0.00281775			10	10		10	10
																										32.3529	0.00206294		4.85236	0.0023752		7.87139	0.00037587		10.4979	0.0031539		3.6114	0.00244729		39.7793	0.00276622			10	10		10	10
																										30.7798	0.00206627		8.48749	0.00241587		8.37166	0.000371162		13.5254	0.00307119		3.7029	0.00242778		38.4215	0.00275835			10	10		10	10
																										27.9121	0.00201911		9.82244	0.00245149		8.36835	0.000387684		15.0203	0.0029945		3.25361	0.00242897		32.0795	0.00267718			10	10		10	10

## Sheet: FigS4 C,D,G,H,K,L,O,P,S,T
FigS4C								FigS4D									FigS4G								FigS4H									FigS4K								FigS4L
8 Hz dFrequency to motion								8 Hz SNR									12 Hz dFrequency to motion								12 Hz SNR									20 Hz dFrequency to motion								20 Hz SNR
VSS 10%	VSS 20%	VSS 40%	VSS 80%					VSS 10%	VSS 20%	VSS 40%	VSS 80%						VSS 10%	VSS 20%	VSS 40%	VSS 80%					VSS 10%	VSS 20%	VSS 40%	VSS 80%						VSS 10%	VSS 20%	VSS 40%	VSS 80%					VSS 10%	VSS 20%	VSS 40%	VSS 80%
0.02	0.02	0.02	0.02					18.2	13.3072	30.3292	34.9061						0.31	0.17	0.04	0.02					42.9967	46.1137	77.9592	91.1615						-4.43	-15.08	-0.04	-0.03					8.35283	22.0484	10.9616	25.1417
17.06	18.1	0.02	0.02					14.0249	15.53	31.2795	35.6457						0.04	0.03	-3.39	0.01					13.4503	12.8735	31.7407	106.017						-0.18	-8.6	-13.97	-0.03					3.28175	7.82078	14.5503	32.411
-0.03	0.02	0.02	0.02					18.4202	16.8486	19.2194	25.4063						-3.51	0.07	0.02	0.02					20.2727	19.66	24.6084	47.9042						3.32	-0.04	-10.3	-0.01					19.1096	18.129	22.2558	32.8473
8.86	0	0.03	0.02					12.4849	18.3357	20.8198	25.5742						0	11.2	10.67	0.01					48.7929	47.753	59.9248	72.1829						-14.12	-0.05	-0.03	-0.02					7.96047	17.0133	17.0155	27.8766
16.34	0.02	0.02	0.02					11.9573	16.219	19.509	23.7218						12.64	-0.04	-3.43	0.01					50.4781	40.5266	52.8165	84.6234						-0.07	5.85	-0.03	-0.03					8.64986	12.4589	16.9883	29.6104
-0.05	6.46	0.02	0.03					7.60159	13.6531	21.4061	24.1629						-3.78	17.2	0.01	0.01					41.6716	55.5047	48.5749	110.497						5.71	-0.02	-0.01	-0.01					11.4225	28.1474	17.9886	42.7294
0.02	-3.03	21.41	0.02					14.0522	21.9228	15.4829	28.1588						0	0.05	11.22	0.03					27.0012	71.5677	47.0575	68.5578						-0.02	0.04	-13.99	-0.01					11.5661	20.687	30.5167	38.4486
9.82	0	0	0.03					9.35644	9.48747	14.7439	21.2818						-4.67	-4.61	-0.02	0.01					33.9501	49.3433	39.2841	83.006						-9.13	-15.01	-0.02	-0.02					15.4054	14.9178	14.7618	19.1812
19.81	0	0.03	0.02					9.12978	21.5386	31.1359	30.7277						-0.04	0	0.02	0.03					24.412	26.7539	41.4994	72.803						0.04	-0.05	-0.01	-0.04					7.43446	12.1045	20.1936	27.6977
-3.06	7.48	0	0.02					15.2826	21.8521	21.4719	25.602						-5.44	0.04	-4.2	0.03					19.8772	21.718	32.8851	87.3512						8.47	0.01	-0.01	-0.02					12.9614	13.1676	16.5379	21.9292
0.03	10.57	0.03	0.02					7.06088	7.04696	15.6819	26.1508						0.48	11.81	0	0.01					16.2788	45.9806	48.5711	66.8345						0.02	-0.03	-0.02	-0.01					8.9779	16.9538	27.7184	27.3009
2.94	18.3	0.04	0.03					7.296	20.5602	20.7167	22.3734						7.67	-0.09	0.01	0.01					43.6164	47.4933	59.7671	98.6417						5.57	8.67	-13.86	-0.02					20.0868	15.7251	23.5079	36.1123
18.26	0.02	0.02	0.02					38.9167	38.862	29.1583	30.968						10.45	10.93	11.81	0.01					15.4423	25.7148	44.8022	78.8846						0.04	-0.02	-0.03	0.01					23.0205	26.9959	34.8474	30.7939
0	0.08	0.02	0.02					23.071	16.6777	31.7957	26.2691						-0.13	-3.53	-0.03	-0.01					20.6922	28.364	57.0098	74.2598						9.58	9.07	8.92	-14.04					4.96265	16.7212	12.0641	27.5076
0.09	21.44	-0.01	0.03					12.3216	15.5516	21.4182	23.453						10.93	-0.02	-3.53	0.01					22.6822	29.0629	57.9927	80.0864						-0.04	-13.77	-15.2	-0.01					11.9961	10.0185	34.6194	30.7198
0.16	-4.21	6.46	0.02					37.5138	25.7635	12.5591	20.516						-3.99	0.08	0.01	0.02					21.2109	49.0099	68.272	94.1784						8.54	-8.76	-0.01	-0.01					10.8245	10.6022	11.0862	27.7718
21.42	0	0.04	0.02					12.5105	10.849	13.3671	23.8786						0.02	-3.4	0.07	0.01					36.5972	48.2222	63.8633	103.157						-0.03	-3.73	-0.03	-0.04					8.30916	8.03134	26.0231	34.1513
-4.13	0.02	0.04	0.02					32.124	23.0565	26.9366	23.1869						10.64	-0.01	0.01	0.01					16.578	33.5592	49.4132	97.5304						9.08	0.01	3.5	-0.02					21.5946	20.0851	23.0485	48.2737
0.03	0.03	6.36	0.02					20.6698	17.8123	31.7452	26.2671						0.02	0.02	11.2	-0.01					40.897	41.9752	25.285	50.7047						-3.79	0.02	-0.02	-0.01					7.28784	10.2476	39.0612	43.5092
5.11	9.78	0.03	0.02					12.7242	29.2487	28.8001	32.1689						-2.7	-8.43	0.02	0.02					15.1202	22.0701	28.5918	69.7663						0.02	-0.02	-0.01	-0.02					8.27442	7.55303	12.2195	30.5772
7.9	0.04	0.02	0.02					11.4513	9.69695	14.3033	26.7333						1.13	-6.94	-0.02	0.01					26.5564	45.6157	35.5397	74.102						6.66	0.02	8.66	-0.02					12.0303	11.9285	23.0384	29.0567
13.97	0.02	0.06	0.02					12.7112	19.1839	23.6354	30.294						11.09	0.22	-0.04	0.01					25.761	49.8734	102.564	82.7484						8.93	-0.01	0.01	-0.03					15.6647	11.2324	15.3572	18.491
-0.03	-0.03	0.02	0.02					8.94965	18.0719	27.3169	27.0391						14.69	-1.99	0.01	0.01					36.4801	67.4657	37.7984	72.1779						-10.24	-13.86	-13.86	-0.02					7.11077	21.4365	17.1198	26.6127
18.17	5.2	0.02	0.03					16.6802	19.7156	17.2002	25.344						-6.94	-0.02	0.07	0.01					25.6975	25.4524	51.1073	102.555						-0.03	0.02	-0.03	-0.03					8.67884	16.8877	19.886	29.0308
0.03	21.85	0.02	0.02					10.5334	16.8414	31.7331	26.5691						1.35	-3.47	0.07	0.02					25.9014	36.335	64.7465	72.9053						3.23	8.86	-0.03	-0.02					8.41943	10.3464	24.1943	31.2632
0.01	0.04	-0.02	0.03					21.9911	12.1626	15.0692	22.2334						-1.96	0.03	0.01	0.01					11.9512	18.1137	30.7289	63.5057						-14.24	-3.73	-0.05	-0.02					15.7967	29.4675	25.7819	31.098
0.02	15.84	7.98	0.02					19.2215	13.6677	26.129	22.1748						-0.02	0.07	-1.67	0.03					19.2097	34.6932	53.0947	79.9855						-10.85	-0.01	-13.96	-0.02					31.2381	48.9922	33.2525	37.6671
-0.04	0.02	0.02	0.02					24.4907	22.139	24.9571	24.6235						11.37	-0.09	-0.01	0.02					30.9344	39.3806	61.0987	74.0364						-7.42	-0.01	-0.05	-0.02					12.805	9.26693	22.1543	29.7114
5.31	6.34	0.04	0.02					7.81783	15.2548	16.5846	30.021						-3.34	-0.01	0.04	0.01					15.0017	37.5798	36.9991	72.91						0.01	-7.07	-0.01	-0.02					20.2771	20.1908	47.2432	29.0551
21.98	0.08	0.04	0.02					20.618	29.0796	16.9028	26.3879						0.15	2.55	6.84	0.01					34.7589	38.228	62.7915	74.4344						8.69	-0.07	-0.01	-0.01					14.5134	19.6865	40.0987	22.7322
0.06	21.84	8.95	0.02					16.337	12.6693	11.2796	25.4635						-5.2	-3.45	11.34	0.01					20.2876	84.9055	51.9383	81.6801						-14.79	3.24	0.01	-14.04					17.2213	31.9109	40.4961	28.3504
8.88	0.02	21.04	0.02					10.4096	14.4053	20.3874	26.1498						9.61	-0.01	-0.02	0.01					17.1323	35.8221	60.4652	80.6792						-0.01	-0.06	-0.02	-0.02					7.72653	9.15575	29.2014	33.0469
18.52	0.1	0.02	0.02					26.5677	26.468	12.6954	20.3933						-8.07	7.88	0.03	0.01					33.8563	28.475	29.6942	64.0025						-0.04	-1.4	-0.05	-0.02					9.86015	6.08741	12.3886	29.5288
-0.02	-0.03	0.03	0.02					10.4989	11.9275	15.617	31.0103						-0.08	-3.28	0.03	0.01					44.0918	75.7127	67.8791	72.8627						8.53	-0.01	-0.03	-0.02					11.6573	8.08451	26.482	30.4818
16.46	7.64	21.44	0.02					17.1012	15.5012	18.2286	23.2776						-0.06	0.03	11.2	0.01					24.2274	26.5211	70.6161	71.5179						-13.81	-8.68	-0.03	-0.02					14.1271	13.1772	15.9477	26.4771
21.05	10.78	-0.02	0.02					18.5204	22.88	22.0519	25.4814						-3.42	12.61	0.02	0.02					12.4313	27.2855	58.5737	83.7981						-4.1	0.04	-0.04	-0.01					24.6193	25.1736	22.946	31.9661
0.13	0.01	21.21	0.02					14.2256	14.9936	14.7319	23.9197						7.9	16.22	11.18	0.02					16.9279	25.6616	50.2787	75.4078						0.07	-8.63	-0.02	-0.02					8.72745	18.5224	34.813	25.9345
10.48	-0.07	0.01	0.03					7.75772	14.2697	27.5563	22.5824						-8.19	0.02	0.04	0.01					16.6992	26.1767	39.6915	99.69						3.42	-0.02	-0.05	-0.02					9.92886	10.6645	22.9896	26.254
0.04	0.03	0.09	0.02					20.107	31.3981	18.3936	29.0279						0.07	0.02	-0.01	0.02					17.2695	28.3284	54.9557	91.3494						5.71	9.07	0.02	-0.02					6.51248	9.84653	21.5297	38.9631
0.16	18.21	0.02	0.02					10.2889	11.8413	20.8967	27.4069						12.6	11.17	-0.02	0.01					39.0797	52.7895	50.9077	77.4174						8.79	-0.05	0.01	-0.03					5.13705	8.52285	24.1718	35.4345
10.35	0.03	0.06	0.02					12.0034	13.3496	11.1814	23.9115						-4.31	0.03	0.01	0.01					21.9317	23.6221	39.0429	73.1899						0.02	6.34	-0.02	-0.02					20.4852	22.4062	24.0398	26.0403
-0.01	0.08	-0.02	0.03					13.8912	12.5666	23.7994	26.5943						0.07	-0.01	9.56	0					31.7409	43.608	59.6241	118.948						0.02	-0.04	-0.02	-0.02					13.3284	17.2802	15.3416	28.2293
6.34	7.6	0.03	0.03					14.9869	16.1127	15.5752	17.5951						-4.3	7.79	0	0.01					21.3514	46.2977	44.82	70.4524						-0.05	-0.06	-0.02	-0.02					16.8221	11.8531	23.387	23.3335
7.59	11.6	0.02	0.02					15.0441	15.1068	29.7996	31.2514						-0.04	11.18	0.07	0.01					34.3365	48.4247	58.5323	76.9332						-14.04	-0.01	0.01	-0.02					18.5205	32.1718	38.75	38.2746
11.61	21.1	0	0.02					14.317	23.0527	21.338	22.2744						11.11	-5.18	0.01	0.01					16.8159	16.7369	35.4578	57.7784						-2.58	-6.21	-15.17	-0.03					21.1832	17.0183	27.6348	35.4043
18.27	0.02	0.02	0.02					15.4814	10.8547	27.0113	21.766						0.07	-0.02	-0.02	0.03					15.3202	43.4062	37.3773	76.7199						0.01	-0.08	-0.06	-0.02					21.2722	24.1407	32.3991	40.1203
19.47	11.79	0.03	0.02					18.0515	16.1418	29.3257	31.6626						7.67	-4.5	0.01	0.01					13.8026	23.85	43.0366	73.1379						0.04	-6.84	-0.02	-0.01					9.74097	9.11348	27.7876	31.1808
-0.14	0.03	0.02	0.03					13.1863	19.0333	14.4287	26.611						10.43	-0.01	0.01	0.01					19.9669	34.9564	69.5088	74.1266						8.11	0.02	-0.05	-0.01					6.39773	12.3876	19.9969	50.5675
7.54	8.03	0.02	0.02					9.77915	10.3799	9.63615	19.143						-3.46	9.22	0	0.01					21.7435	25.1341	35.439	93.9744						0	8.66	0.01	-0.02					15.5039	16.6276	17.4546	25.12
10.87	13.25	9.14	0.03					12.3272	20.3111	39.103	21.8676						-4.98	0	0.03	0.01					43.1547	42.0293	65.1286	109.303						9.56	-0.08	-0.01	-0.03					24.546	15.2424	21.8294	27.9017
0.02	21.02	21.09	0.03					26.9022	22.9907	28.3173	33.4665						-0.04	10.56	0.03	0					36.2593	29.0075	59.0133	99.8368						-15.17	0.02	-0.03	-0.02					9.85249	21.0649	29.1607	30.087
10.7	-0.04	0.02	0.03					17.2721	24.222	20.1536	28.4222						-4.62	-8.33	11.58	0.01					16.8382	16.089	43.2534	81.8054						-12.04	0.04	-0.01	-0.02					10.953	9.10145	15.2457	30.8956
20.11	8.89	0.03	0.02					13.6971	15.6315	11.0846	22.7874						-0.01	-0.03	-0.01	0.01					18.5506	32.722	35.6141	60.8292						-8.61	-0.04	-0.02	-0.02					9.10662	10.9839	26.7887	23.6984
-0.07	20.52	6.46	0.02					27.6765	38.9508	25.5375	22.2271						9.35	10.66	0.03	0.01					27.8546	51.9501	70.8108	103.631						-0.04	-0.02	-0.01	-0.01					6.66026	17.2832	32.3512	29.8031
13.08	0.03	20.93	0.02					9.9507	16.5419	23.4638	25.5948						11.83	0.07	11.53	0.01					23.4074	28.5698	65.3298	100.163						6.34	-0.02	-0.01	-14.04					18.6643	40.3116	58.8611	31.6799
-0.02	0.13	0.02	0.02					15.9975	12.976	15.0516	21.4216						0.05	0.05	-0.02	0.02					19.5335	24.9392	48.3702	90.8661						9.04	5.36	-0.01	-0.02					29.0416	50.3906	26.84	33.4227
9.11	6.22	0.02	0.02					23.8285	16.4392	37.4591	35.0197						10.64	12.72	0.01	0.01					87.7421	68.8666	72.7438	81.7063						-0.01	-3.82	-0.04	-0.02					14.9091	13.4316	29.7376	24.2489
15.13	0.02	6.43	0.02					17.3022	12.8145	25.1974	27.4229						0.09	0.03	0.03	0.01					43.9178	39.4879	76.3264	93.6105						-10.67	0	-0.02	-0.02					15.5069	10.5989	18.3768	34.4944
0.07	7.98	18.03	0.02					11.1853	21.4411	27.2107	31.4447						10.66	-4.75	0.03	0.01					25.8847	25.7684	48.7667	75.3306						-7.16	3.4	-0.02	-14.04					9.23669	13.0765	14.8924	31.6164
0.08	21.42	0.03	0.02					43.2109	20.1308	23.8922	23.753						16.94	-0.02	0.03	0.01					18.5539	14.501	46.8181	97.8044						-0.04	5.13	-0.05	-0.03					12.8124	19.8694	19.4771	40.7845
7.65	0.05	0.02	0.03					14.8584	21.3276	25.8109	30.2818						-2.9	7.26	0.03	0.02					16.4536	54.8481	93.1902	84.561						2.14	-15.17	-14.04	-0.02					14.8065	10.8245	14.3331	23.0498
-0.01	0.02	0.02	0.02					11.4018	15.833	34.8848	24.9968						-0.07	16.07	11.52	0					27.4652	31.1905	36.8558	82.3237						7.39	-14.1	-0.02	-14.04					10.064	20.846	17.0854	22.0291
11.93	6.38	0.02	0.02					19.1054	25.9111	20.6971	28.3091						13.64	0.03	0.04	-0.01					14.9262	20.0364	59.7066	103.15						-14.26	-0.04	-0.01	-0.01					12.7126	17.4002	20.9192	37.4309
21.71	21.12	7.93	0.02					7.76865	13.2494	12.9301	27.1096						16.2	9.16	-0.01	0.03					22.4509	29.533	47.7241	92.4377						-11.92	-0.02	-14.07	-0.02					8.56906	11.3132	27.9588	34.1455
0.06	0.04	21.54	0.02					26.7917	18.7181	11.5854	24.0794						0.14	0.03	-0.02	-0.01					15.1479	26.6658	51.4492	52.9658						-10.29	-0.07	0.01	-0.03					19.0579	23.1647	17.1802	29.9901
8.03	7.85	0.06	0.02					12.1157	18.9537	27.114	33.9967						12.72	12.72	0	0.03					36.8553	50.2117	57.9435	83.6051						-0.07	-3.14	-0.02	-0.03					11.7287	26.908	23.8105	29.7808
20.99	0	0.06	0.03					9.93792	12.9241	17.9145	24.2578						0.07	-3.56	0.07	0.01					23.544	30.4639	55.0961	80.5841						3.32	-0.04	-0.02	-14					31.2092	32.0195	26.262	39.552
-0.07	7.84	0.03	0.02					17.0984	19.5701	24.3572	25.0428						-10.06	0.03	-0.02	0.01					32.4256	56.6482	104.441	90.034						-14.74	0.04	0.01	-0.02					17.6187	16.3495	29.1728	27.4202
8.87	0.02	0.02	0.02					16.1543	14.8577	15.4199	22.5597						-0.04	0.01	11.05	0.01					25.7903	28.5468	40.1719	87.8867						-5.92	-0.04	-3.18	-0.01					18.2097	18.018	21.2328	19.5153
20.61	8.86	7.84	0.02					21.3332	21.3686	27.68	33.9308						4.6	-0.04	0.03	0.01					10.3147	7.98289	67.2897	147.867						0.01	0.02	0.01	-0.02					24.072	27.4177	25.1134	33.31
0.03	21.39	18.04	0.02					14.6562	22.0101	20.7103	25.7523						16.04	0.06	-0.01	0.03					31.9102	25.7289	39.2906	73.951						-11.88	-14.82	-10.43	-14.03					21.4819	25.5358	60.923	33.1732
0.17	0.02	0.02	0.02					28.5691	16.2449	20.1608	33.6938						0.07	11.38	9.59	0.02					24.4732	59.9132	80.0009	86.4244						-0.07	-0.04	-0.01	-0.02					13.6918	13.2797	12.9601	34.8065
8.95	0.02	7.98	0.02					10.2155	17.3383	25.5634	27.7159						11.34	-0.02	0.03	0.01					22.4438	45.3584	44.0998	60.5458						0.06	0.01	-13.99	-0.04					6.68468	11.8501	18.4826	27.3428
14.02	0.01	0.03	0.02					7.38823	14.7073	17.467	25.6622						0.07	4.52	-0.06	0.01					10.905	32.5106	51.3278	72.1501						-0.11	-13.98	-0.01	-0.02					11.7806	11.9421	35.6698	26.5348
20.94	20.73	0.02	0.02					10.6346	25.5418	16.3842	22.3916						11.11	0.08	0.04	0					49.8316	58.0026	82.3298	79.4668						6.81	-0.02	-0.02	-0.02					8.28019	16.582	24.4896	51.1641
0.04	0.01	6.41	0.02					21.6245	13.6391	15.1352	25.4154						-3.57	-0.03	11.32	-0.01					24.6336	60.9286	66.0946	82.8033						-13.91	-10.24	-14.07	-0.01					8.01015	11.9607	17.1945	22.9928
7.93	17.98	0	0.02					8.79856	12.9625	26.6789	23.3373						17.24	4.56	0.07	0.02					24.9134	29.6037	41.4562	66.3788						-10.17	0.01	-0.03	-0.01					4.34704	10.5239	14.9345	23.9726
-2.68	-0.03	0.02	0.02					13.0976	12.7354	13.6837	23.9805						-8.34	16.22	0.01	0.03					12.5552	33.0444	35.1443	74.3951						-0.02	-0.08	3.45	-0.02					22.0569	17.835	20.7141	22.5289
0.06	0.04	0.03	0.02					19.7568	28.0492	25.2022	24.6142						-0.01	0.07	0.03	0.01					17.2829	52.8407	52.7783	99.7704						0	3.45	-0.03	-14.04					7.10312	14.341	16.3873	35.1481
8.08	6.44	6.36	0.02					19.4388	11.405	12.4681	22.3496						-3.91	0.02	-0.03	0.01					14.1144	33.2611	68.0949	89.9584						3.46	-14.93	-0.03	-0.03					12.8784	15.3682	29.2049	28.5847
-0.06	20.78	0.04	0.02					12.5406	11.3542	25.9021	22.617						-0.04	7.38	0.02	0.02					20.2164	22.2079	62.2718	75.0778						0.01	-10.71	-0.02	-0.01					10.0967	14.1247	26.1603	22.7026
1.5	-0.06	0.02	0.02					23.3537	29.3694	27.2066	25.32						7.28	0.04	0.02	0.01					30.2349	54.1506	110.588	86.599						-12.39	-0.04	-0.05	-0.02					22.689	19.415	25.3907	36.1575
6.44	0.02	0.02	0.02					9.31434	11.9764	12.9447	25.2236						-0.01	0.01	0.07	0.01					21.069	34.1386	40.3392	81.9257						0.03	-0.01	0.01	-0.01					12.2008	14.417	56.3057	43.0149
18.18	6.43	7.91	0.02					16.8819	14.3789	20.5374	27.1067						-3.93	11.18	11.38	0.02					17.6815	43.6602	65.6334	121.15						-0.02	-0.05	-0.05	-0.01					4.92912	12.1338	22.9289	44.9483
20.77	21.53	21.21	0.03					10.012	25.6637	33.1993	25.5989						0.14	-0.06	0.03	0.02					5.06651	14.0711	35.9245	66.9041						-13.8	-0.02	0.01	-14.03					39.7055	73.8101	31.6784	36.1972
0.04	0.06	0.02	0.02					12.5598	12.9078	20.3857	23.905						3.04	-8.43	-3.17	0.01					60.2306	36.0185	81.4824	91.0984						-5.97	-0.01	-0.03	-0.02					12.4473	19.2825	18.3662	26.5085
11.6	7.89	0.02	0.02					11.7077	13.2539	18.3309	21.9097						11.34	-3.73	-0.03	0.02					17.6986	28.2164	43.7377	68.9393						0	-14.13	-0.03	-0.01					12.9536	18.9727	30.36	33.2687
0.03	15.12	0.03	0.02					7.10529	14.6593	21.9933	26.061						-0.05	-0.04	0.03	-0.01					23.474	22.0529	25.7126	57.4469						3.35	0.02	-13.98	-0.02					17.7298	30.1219	27.444	35.2879
15.89	0.03	0.02	0.02					18.2	13.4068	13.3943	22.4179						4.59	7.9	-0.04	0.02					27.137	35.9982	47.567	78.3443						5.49	-0.02	-0.01	-0.02					20.0187	27.2849	14.5548	34.9414
-0.01	0.04	21.31	0.02					15.8514	11.0444	15.694	25.9816						7.73	-1.84	-0.01	0.03					22.1781	57.2166	78.8542	60.8911						-9.93	2.12	-0.03	-0.02					17.306	19.7576	32.7838	30.005
6.37	-0.02	0.04	0.02					10.6012	25.31	25.6414	30.9213						0.05	0.1	0.03	0.01					30.171	25.5074	40.2814	58.943						-4.05	-0.01	-0.05	-0.02					12.1283	24.9241	18.4657	34.1928
21	0.03	7.93	0.02					8.50596	15.037	31.4742	22.9267						2.18	12.65	0.02	0.01					24.3582	62.7797	149.919	102.098						-0.2	0.08	0.02	-0.02					12.038	11.7885	21.1916	34.4247
-0.02	10.54	0.02	0.03					23.3085	25.1469	24.5211	22.9402						-0.03	-0.06	0.08	-0.01					23.6142	27.74	31.5101	58.0998						-0.03	-5.63	-0.03	-0.02					10.9593	26.5001	26.9026	32.3781
0.02	18.18	0.04	0.02					14.5716	32.6873	26.0345	27.056						3.92	11.33	-3.39	0.01					47.6133	28.2053	60.0264	64.2931						7.39	0.01	8.86	-0.02					12.1802	11.163	12.7109	18.0082
20.78	0.06	0.02	0.02					11.2034	19.4292	24.9582	23.4545						11.96	0.03	0.02	0					22.9286	30.785	54.4477	62.7376						-0.16	8.69	-0.02	-0.02					21.3425	17.608	25.5307	28.3026
0.03	18.03	0.02	0.02					7.17169	8.19351	10.9646	16.2989						16.22	7.65	0.05	0.02					21.6527	28.3971	45.0528	63.3207						5.61	-13.98	-0.01	-0.01					15.9971	20.6107	13.4246	24.0805
4.72	0.04	0.02	0.02					6.24868	14.2752	16.1084	23.8826						0.69	-3.35	-3.34	0.03					35.863	25.4129	60.1407	65.8329						-14.07	-10.49	0.02	-0.02					9.20739	5.70226	21.0295	38.3634
10.8	0.15	0.02	0.02					19.3341	17.1493	20.9369	29.9458						14.25	0.04	-0.02	0.02					19.9831	31.6536	50.6364	65.8278						-0.04	-0.01	0.02	-0.02					33.5947	11.5327	11.8358	24.3066
17.94	7.94	7.83	0.02					10.6469	15.0061	16.8465	22.7524						0.05	9.63	11.21	0.03					14.7776	37.3447	66.8058	76.3424						6.81	8.24	-13.86	-0.01					7.28336	36.8154	40.3879	36.7984
20	11.52	0.02	0.02					14.3041	20.6234	34.4022	17.7665						-3.45	-1.84	0.03	0.03					23.3155	25.0013	43.8599	90.9902						0.08	-0.01	-0.03	-0.02					7.37783	8.24374	27.8011	35.2368
0	15.5	0															0.27	0.07	-0.02															6.89	-0.03	-0.03	-0.02
14.66	0.02	0.03															17.06	12.31	0.04															-4.06	-0.05	-0.02	-0.01
16.94	0.02	0.02															0.1	-0.02	-3.6															-0.02	-0.08	-0.03	-0.02
0.05	0.03	21.1															-0.03	0.05	0.01															-13.55	-0.03	-0.03	-0.01
6.59	0	0.01						Table Analyzed	Vibration 8 Hz VSS SNR								-8.49	11.81	0.02						Table Analyzed	Vibration 12 Hz VSS SNR								0	-0.03	-10.32	-14					Table Analyzed	Vibration 20 Hz Xcorr SNR
20.78	0.03	0.02															-3.75	0.03	-0.01															8.59	-0.03	-0.02	-0.02
-0.07	0.06	0.02						Friedman test									6.32	0.08	11.82						Friedman test									-0.05	0.01	0.02	-0.01					Friedman test
-2.95	0.03	21.31						P value	<0.0001								-1.84	0.03	0						P value	<0.0001								0.01	-10.29	-14.08	-14.04					P value	<0.0001
0.02	0.02	0.02						Exact or approximate P value?	Approximate								-0.01	-0.03	-0.02						Exact or approximate P value?	Approximate								-0.04	-0.08	-0.01	-0.03					Exact or approximate P value?	Approximate
6.32	7.77	0.03						P value summary	****								-4.03	-0.02	0.07						P value summary	****								0	-0.03	-14.09	-0.02					P value summary	****
0.04	18.17	0.04						Are means signif. different? (P < 0.05)	Yes								1.2	12.1	9.32						Are means signif. different? (P < 0.05)	Yes								4.29	-0.01	-0.03	-0.01					Are means signif. different? (P < 0.05)	Yes
15.1	21.5	0.02						Number of groups	4								2.86	0.01	-5.18						Number of groups	4								-14.14	-13.84	0.02						Number of groups	4
0.02	0.01	0.04						Friedman statistic	122.5								9.57	9.64	-0.02						Friedman statistic	236.8								-7.24	-0.01	0.01						Friedman statistic	290.5
8.05	7.9	21.21															16.02	-1.84	-0.02															-1.44	-14	-0.01
-2.95	0.02	0.02						Data summary									17.94	0.12	0.02						Data summary									-0.05	-0.02	-0.02						Data summary
0.02	18.06	0.03						Number of treatments (columns)	4								-6.81	11.3	11.32						Number of treatments (columns)	4								9.85	-14.92	-14						Number of treatments (columns)	4
11.08	0.07	0.04						Number of subjects (rows)	100								7.45	-0.04	-4.1						Number of subjects (rows)	100								-9.88	-0.07	-0.02						Number of subjects (rows)	100
0.02	12.98	0.04															-0.04	10.56	-0.03															-3.24	-0.04	0.02
1.15	0.02	0.02															-3.44	-4.38	9.16															-0.02	0.03	-0.03
6.36	0.06	0.04						Multiple comparison									0.12	0.01	-0.03						Multiple comparison									8.84	-0.05	0.02						Multiple comparison
10.39	6.53	18.04						Number of families	1								11.88	11.25	11.77						Number of families	1								-12.04	-14.04	-13.96						Number of families	1
11.77	21.15	0.03						Number of comparisons per family	6								-3.35	-4.03	-3.7						Number of comparisons per family	6								0.01	-0.04	-0.02						Number of comparisons per family	6
18.41	0.06	0.02						Alpha	0.05								0.07	0	0.02						Alpha	0.05								0.06	0.07	-14.09						Alpha	0.05
20.97	7.97	0.02															10.49	-4.72	0.02															2.49	-4.07	-0.02
0.06	-0.01	0.03						Dunn's multiple comparisons test	Rank sum diff.	Significant?	Summary	Adjusted P Value					0.08	-0.05	0.02						Dunn's multiple comparisons test	Rank sum diff.	Significant?	Summary	Adjusted P Value					-0.04	0.02	8.87						Dunn's multiple comparisons test	Rank sum diff.	Significant?	Summary	Adjusted P Value
6.43	21.43	0.05						VSS 10% vs. VSS 20%	-45	No	ns	0.0823	A-B				0.12	-1.84	-3.39						VSS 10% vs. VSS 20%	-71	Yes	***	0.0006	A-B				-3.92	8.81	-0.03						Xcorr 10% vs. Xcorr 20%	-98	Yes	****	<0.0001	A-B
0	0.06	15.33						VSS 10% vs. VSS 40%	-109	Yes	****	<0.0001	A-C				-0.06	0	0.03						VSS 10% vs. VSS 40%	-165	Yes	****	<0.0001	A-C				-0.05	0.01	-0.02						Xcorr 10% vs. Xcorr 40%	-200	Yes	****	<0.0001	A-C
6.52	0.03	0.02						VSS 10% vs. VSS 80%	-190	Yes	****	<0.0001	A-D				-0.03	17.2	10.42						VSS 10% vs. VSS 80%	-264	Yes	****	<0.0001	A-D				6.9	-15.09	-13.97						Xcorr 10% vs. Xcorr 80%	-294	Yes	****	<0.0001	A-D
15.16	10.57	0.02						VSS 20% vs. VSS 40%	-64	Yes	**	0.0027	B-C				12.1	-3.53	-0.03						VSS 20% vs. VSS 40%	-94	Yes	****	<0.0001	B-C				0.04	-13.83	-0.02						Xcorr 20% vs. Xcorr 40%	-102	Yes	****	<0.0001	B-C
0.22	-0.02	0.02						VSS 20% vs. VSS 80%	-145	Yes	****	<0.0001	B-D				0.01	0.05	-0.01						VSS 20% vs. VSS 80%	-193	Yes	****	<0.0001	B-D				-11.94	-10.59							Xcorr 20% vs. Xcorr 80%	-196	Yes	****	<0.0001	B-D
7.44	20.95	0						VSS 40% vs. VSS 80%	-81	Yes	****	<0.0001	C-D				-7.06	11.15	0						VSS 40% vs. VSS 80%	-99	Yes	****	<0.0001	C-D				-0.01	-0.05							Xcorr 40% vs. Xcorr 80%	-94	Yes	****	<0.0001	C-D
11.6	0.02																0.14	12.46	-3.5															3.3	-0.06
15.4	-0.1							Test details	Rank sum 1	Rank sum 2	Rank sum diff.	n1	n2				7.09	-7.49	0.02						Test details	Rank sum 1	Rank sum 2	Rank sum diff.	n1	n2				0.02	-0.02							Test details	Rank sum 1	Rank sum 2	Rank sum diff.	n1	n2
0.01	7.77							VSS 10% vs. VSS 20%	164	209	-45	100	100				-0.02	-4.35	0.09						VSS 10% vs. VSS 20%	125	196	-71	100	100				7.53	-0.07							Xcorr 10% vs. Xcorr 20%	102	200	-98	100	100
0.03	18.1							VSS 10% vs. VSS 40%	164	273	-109	100	100				11.18	0.03	0.01						VSS 10% vs. VSS 40%	125	290	-165	100	100				-18.41	-0.04							Xcorr 10% vs. Xcorr 40%	102	302	-200	100	100
10.34	0.02							VSS 10% vs. VSS 80%	164	354	-190	100	100				-5.14	8.73	-3.34						VSS 10% vs. VSS 80%	125	389	-264	100	100				-5.54	-0.04							Xcorr 10% vs. Xcorr 80%	102	396	-294	100	100
-2.78	-0.01							VSS 20% vs. VSS 40%	209	273	-64	100	100				-0.01	0.12	0.06						VSS 20% vs. VSS 40%	196	290	-94	100	100				0.02	0.05							Xcorr 20% vs. Xcorr 40%	200	302	-102	100	100
0.03	7.83							VSS 20% vs. VSS 80%	209	354	-145	100	100				11.21	0.02	0.03						VSS 20% vs. VSS 80%	196	389	-193	100	100				8.67	-14.03							Xcorr 20% vs. Xcorr 80%	200	396	-196	100	100
-2.99	0.04							VSS 40% vs. VSS 80%	273	354	-81	100	100				-0.05	16.43							VSS 40% vs. VSS 80%	290	389	-99	100	100				-15.11	0.01							Xcorr 40% vs. Xcorr 80%	302	396	-94	100	100
0.07	7.94																13.99	0.03																-10.43	-13.76
7.71	18																-5.7	-0.02																-0.04	-0.05
11.32	0.02																-1.95	0.01																-0.04	2.18
20.97	0.02																0.03	-0.03																-0.03	5.65
0.17	6.34																10.61	11.15																-14.14	-10.05
0.02	16.45																16.56	0.07																-0.03	-3.99
10.58	0.04																-6.1	11.33																-10.05	-0.04
20.05	18.03																-1.81	-4.14																-0.12	-13.98
-0.07	0.02																7.52	-0.02																-6.17	0.02
7.89	8																17	5.43																-0.03	-0.03
18.06	0																0.05	10.98																-0.01	0.01
0.02	0.03																7.01	17.4																-0.04	-0.02
17.94	20.88																-4.34	0.09																-10.23	0.03
20.93	0.04																0.04	-0.02																-0.02	6.9
-2.98	0.03																11.22	11.85																6.94	-15.05
0.09	0.01																0.15	17.08																-14.09	-0.03
7.97	-2.98																0.04	0.05																-10.23	9.08
13.05	0.02																12.55	9.41																-0.1	0.02
18.77	6.57																14.05	-0.01																-0.04	-13.8
0.04	13.35																-4.58	0.09																-10.98	-9.07
1.9	18.07																0.03	7.14																-0.01	-0.03
6.43	0.08																2.24	-2.92																-13.93	-14.08
12.86	0.04																11.01	0																-0.02	-0.04
21.03	7.12																0.02	-4.61																0.04	3.6
-2.79	0.11																8.9	0.03																-14.93	8.93
0.05	17.94																-3.53	5.58																-10.16	-0.04
-0.03	0.02																-0.06	-0.02																-0.07	-0.02
20.28	0.03																7.79	12.84																-10.4	-13.86
0.08	0.03																0.05	-0.04																-0.12	-9.15
21.97	7.94																7.78	9.09																6.76	-0.02
0.02	0.04																-5.27	-0.06																0.08
6.62	0.02																1.02	9.66																5.72
10.6	-0.02																3.38	0.02																-14.2
0.02	7.65																10.95	0.07																-11.37
15.28	0.05																0.05	-0.01																-0.03
20.89	15.43																6.93	11.59																4.59
0.04	-2.93																10.58	0.07																8.09
-3.47	0.02																-8.57	10.47																-14.07
7.58	11.45																-0.03	-1.78																-9.07
18.15	17.09																3.69	-0.03																0.02
0.03	21.75																11.21	0																-2.96
16.22	0.02																16.97	-0.01																0.03
-0.03	0.04																0.14	0.01																-13.59
2.73	20.48																15.13	0.09																-7.01
7.83	0																0.02	12.37																-0.04
0.06	18.34																13.99	0.03																0.12
2.74																	-4.36	-4.5																2.11
7.94																	0.17	0.03																8.69
14.65																	7.07	0.05																-13.9
18.01																	-2.93																	-9.03
0																	-0.07																	-2.74
1.49																	-4.71																	-0.03
0.01																	0																	8.12
6.3																	2.61																	-0.07
0.08																	8.69																	2
7.8																	13.53																	7.19
17.95																	15.36																	-15.06
0.04																	0																	-10.08
0.03																	12.83																	-4.45
6.2																	-0.08																	-0.06
9.27																	5.43																	-0.08
12.04																	9.14																	-14.22
0																	0.01																	-0.03
7.75																	0.03																	8.69
0.02																	-0.06																	-13.94
5.71																	9.84																	-0.07
18																	15.08																	8.6
0.02																	-2.86																	-13.98
-0.04																	0.01																	0.01
6.51																	11.64																	-13.64
9.73																	0.18																	-4.17
21.4																	7.94																	-0.05
-0.04																	0																	8.86
18.12																	10.6																	-10.01
19.91																	-3.22																	-3.99
0.17																	-3.22																	-1.52
6.23																	0.1																	-0.03
-2.76																	8.03																	8.92
0																	0.03																	-14.22
11.57																	-1.95																	0.08
18.38																	0.2																	3.75
7.38																	12.32																	7.35
15.77																	0.02																	-0.02
21.21																	0.1																	8.09
-0.08																	11.25																	-15.09
1.92																	-7.27																	-10.66
7.51																	0.07																	-0.01
21.15																	2.53																	-1.5
0.07																	7.79																	0.02
4.92																																		3.85
13.18																																		-3.16
18.82																																		0.06
-0.01																																		6.89
7.44																																		-15.1
10.68																																		-10.2
17.26																																		0.02
0.02																																		9
0.06																																		0.02
6.65																																		-14.89
10.8																																		-3.22
13.81																																		-0.05
7.47																																		-10.23
0.05																																		-0.09
14.59																																		-0.06
6.36																																		-3.28
0.03																																		8.72
13.15																																		-17.12
21.74																																		-13.64
0.01																																		0
6.46																																		6.59
12.28
16.21
20.4
0.04
14.32
20.1

## Sheet: FigS5 C,D,G,H,K,L,O,P,S,T
FigS5C								FigS5D									FigS5G								FigS5H									FigS5K								FigS5L
8 Hz dFrequency to motion								8 Hz SNR									12 Hz dFrequency to motion								12 Hz SNR									20 Hz dFrequency to motion								20 Hz SNR
Xcorr 10%	Xcorr 20%	Xcorr 40%	Xcorr 80%					Xcorr 10%	Xcorr 20%	Xcorr 40%	Xcorr 80%						Xcorr 10%	Xcorr 20%	Xcorr 40%	Xcorr 80%					Xcorr 10%	Xcorr 20%	Xcorr 40%	Xcorr 80%						Xcorr 10%	Xcorr 20%	Xcorr 40%	Xcorr 80%					Xcorr 10%	Xcorr 20%	Xcorr 40%	Xcorr 80%
-0.0159681	-0.0159681	-0.0159681	-0.0159681					570.745	1315.62	3574.35	4268.42						-0.0239521	-0.0239521	-0.0239521	-0.0239521					1443.54	2097.89	4098.46	5888.87						-0.0399202	-0.0399202	-0.0399202	-0.0399202					2295.87	5786.63	4961.5	10374.2
-0.0159681	-0.0159681	-0.0159681	-0.0159681					1082.45	1768.17	3089.28	5861.18						-0.0239521	-0.0239521	-0.0239521	-0.0239521					1154.78	2800.64	5832.11	6664.34						-0.0399202	-0.0399202	-0.0399202	-0.0399202					2151.76	3163.47	17090.4	10403.5
-0.0159681	-0.0159681	-0.0159681	-0.0159681					1154.22	2771.44	3914.35	4886.4						-0.0239521	-0.0239521	-0.0239521	-0.0239521					1733.02	2982.27	3012.27	6279.01						-0.0399202	-0.0399202	-0.0399202	-0.0399202					952.048	1598.39	4905.62	12514.4
-0.0159681	-0.0159681	-0.0159681	-0.0159681					715.602	1651.64	2812.45	5091.57						-0.0239521	-0.0239521	-0.0239521	-0.0239521					3405.64	3716.58	4286.32	7024.42						-0.0399202	-0.0399202	-0.0399202	-0.0399202					1614.86	2818.2	5251.03	8874.74
-0.0159681	-0.0159681	-0.0159681	-0.0159681					1352.36	2847.74	4990.21	4594.32						-0.0239521	-0.0239521	-0.0239521	-0.0239521					1528.36	2108.78	3984.38	6295.6						-0.0399202	-0.0399202	-0.0399202	-0.0399202					803.774	2302.22	3471.54	9223.57
-0.0159681	-0.0159681	-0.0159681	-0.0159681					1399.03	3040.46	3525.99	5607.71						-0.0239521	-0.0239521	-0.0239521	-0.0239521					1773.01	1624.18	3042.01	6581.15						-0.0399202	-0.0399202	-0.0399202	-0.0399202					1531.16	2359.75	8623.41	11898.5
-0.0159681	-0.0159681	-0.0159681	-0.0159681					1067.96	1532.94	2544.59	4544.45						-0.0239521	-0.0239521	-0.0239521	-0.0239521					1309.71	2513.22	3591.02	5959.51						-0.0399202	-0.0399202	-0.0399202	-0.0399202					776.057	2363.39	4603.57	10456.1
-0.0159681	-0.0159681	-0.0159681	-0.0159681					1655.49	4353.24	4969.56	5794.06						-0.0239521	-0.0239521	-0.0239521	-0.0239521					2043.31	2716.82	5352.23	6225.84						-0.0399202	-0.0399202	-0.0399202	-0.0399202					1912.98	3658.27	5854.58	7137.73
-0.0159681	-0.0159681	-0.0159681	-0.0159681					949.388	2332.45	5247.57	5658.17						-0.0239521	-0.0239521	-0.0239521	-0.0239521					1313.08	1762.63	3811.62	6084.25						-0.0399202	-0.0399202	-0.0399202	-0.0399202					876.077	2574.42	4928.82	16476.9
-0.0159681	-0.0159681	-0.0159681	-0.0159681					982.783	1358.78	2171.18	4388.29						-0.0239521	-0.0239521	-0.0239521	-0.0239521					856.916	1271.52	2977.4	7032.4						-0.0399202	-0.0399202	-0.0399202	-0.0399202					1760.19	4096.83	4895.57	8863.25
-0.0159681	-0.0159681	-0.0159681	-0.0159681					1254.49	2518.84	3874.28	5729.88						-0.0239521	-0.0239521	-0.0239521	-0.0239521					1003.78	3388.99	4685.12	6405.28						-0.0399202	-0.0399202	-0.0399202	-0.0399202					786.937	1717.25	3908.88	8349.96
-0.0159681	-0.0159681	-0.0159681	-0.0159681					1005.59	1634.45	3715.82	6004.37						-0.0239521	-0.0239521	-0.0239521	-0.0239521					1256.28	2606.36	3375.17	5759.27						-0.0399202	-0.0399202	-0.0399202	-0.0399202					762.771	1645.64	6037.51	10651.8
-0.0159681	-0.0159681	-0.0159681	-0.0159681					1483.53	4301.87	4428.69	6542.22						-0.0239521	-0.0239521	-0.0239521	-0.0239521					2014.82	2509.05	3868.41	7778.73						-0.0399202	-0.0399202	-0.0399202	-0.0399202					1125.12	2454.84	5760.79	8636.71
-0.0159681	-0.0159681	-0.0159681	-0.0159681					1548.79	1750.99	2907.61	5117.3						-0.0239521	-0.0239521	-0.0239521	-0.0239521					901.776	1525.81	4348.9	6610.64						-12.016	-0.0399202	-0.0399202	-0.0399202					811.238	1938.66	3080.39	8576.5
-0.0159681	-0.0159681	-0.0159681	-0.0159681					977.462	1493.02	2460.71	4854.21						-0.0239521	-0.0239521	-0.0239521	-0.0239521					1103.62	2362.99	4422.69	5993.8						-0.0399202	-0.0399202	-0.0399202	-0.0399202					1237.29	2280.17	4025.45	8340.62
-0.0159681	-0.0159681	-0.0159681	-0.0159681					1393.36	2095.17	5618.79	5316.53						-0.0239521	-0.0239521	-0.0239521	-0.0239521					1592.76	4127.55	3828.23	5685.96						-9.52096	-0.0399202	-0.0399202	-0.0399202					912.127	1564.13	3956.58	9095.34
-0.0159681	-0.0159681	-0.0159681	-0.0159681					1224.69	1680.79	2986.07	5450.29						-0.0239521	-0.0239521	-0.0239521	-0.0239521					800.709	1887.08	3685.33	6574.19						-0.0399202	-0.0399202	-0.0399202	-0.0399202					1661.15	2404.84	5432.78	13676.7
-0.0159681	-0.0159681	-0.0159681	-0.0159681					1227.4	2812.98	3833	6333.02						-0.0239521	-0.0239521	-0.0239521	-0.0239521					964.185	1830.46	3804.71	7002.75						-0.0399202	-0.0399202	-0.0399202	-0.0399202					1404.05	1571.08	4338.53	6754.66
-0.0159681	-0.0159681	-0.0159681	-0.0159681					1839.92	2373.23	3057.6	5292.47						-0.0239521	-0.0239521	-0.0239521	-0.0239521					1217.51	4707.37	5712.93	8082.72						-0.0399202	-0.0399202	-0.0399202	-0.0399202					1352.81	2494.72	5304.16	10201.3
-0.0159681	-0.0159681	-0.0159681	-0.0159681					2402.72	3203.29	3287.56	5052.39						-0.0239521	-0.0239521	-0.0239521	-0.0239521					1628.6	3593.04	3927.64	7826.12						-0.0399202	-0.0399202	-0.0399202	-0.0399202					1361.36	3068.02	3136.44	7508.7
-0.0159681	-0.0159681	-0.0159681	-0.0159681					779.085	1505.53	2879.29	4768.58						-0.0239521	-0.0239521	-0.0239521	-0.0239521					1199.32	2630.35	3842.74	6174.3						-0.0399202	-0.0399202	-0.0399202	-0.0399202					1968.19	4966.12	8424.32	10764.2
-0.0159681	-0.0159681	-0.0159681	-0.0159681					707.339	1138.59	1907.17	4835.95						-0.0239521	-0.0239521	-0.0239521	-0.0239521					873.4	2107.9	4668.74	5141.54						-0.0399202	-0.0399202	-0.0399202	-0.0399202					1124.36	1976.94	3912.83	10354.1
-0.0159681	-0.0159681	-0.0159681	-0.0159681					1358.98	2051.37	5750.87	6092.82						-0.0239521	-0.0239521	-0.0239521	-0.0239521					1389.79	2381.03	3642.52	6432.26						-0.0399202	-0.0399202	-0.0399202	-0.0399202					1832.55	2760.97	7656.19	9304.13
-0.0159681	-0.0159681	-0.0159681	-0.0159681					1471.17	1968.23	2557.48	4960.75						-0.0239521	-0.0239521	-0.0239521	-0.0239521					625.047	1466.7	2461.11	4333.53						-0.0399202	-0.0399202	-0.0399202	-0.0399202					1006.84	2309.44	4371.46	6205.05
-0.0159681	-0.0159681	-0.0159681	-0.0159681					1142.36	1592.57	2298.28	5528.36						-0.0239521	-0.0239521	-0.0239521	-0.0239521					1121.04	3303.01	7840.5	6657.03						-0.0399202	-0.0399202	-0.0399202	-0.0399202					2284.27	2693.99	5668.4	7659.38
-0.0159681	-0.0159681	-0.0159681	-0.0159681					1096.66	1700.79	3408.5	3963.95						0.47505	-0.0239521	-0.0239521	-0.0239521					984.394	1827.7	3291.89	6303.12						-0.0399202	-0.0399202	-0.0399202	-0.0399202					1342.3	2388.22	4704.33	8205.31
-0.0159681	-0.0159681	-0.0159681	-0.0159681					1598.78	2244.76	2912.88	4914.62						-0.0239521	-0.0239521	-0.0239521	-0.0239521					1239.29	3134.07	4756.88	7950.03						-12.016	-0.0399202	-0.0399202	-0.0399202					723.277	2191.71	4362.02	9536.85
-0.0159681	-0.0159681	-0.0159681	-0.0159681					1466.3	2439.83	7464.79	5369.1						-0.0239521	-0.0239521	-0.0239521	-0.0239521					1159.42	2928.95	6090.3	9535.26						-0.0399202	-0.0399202	-0.0399202	-0.0399202					989.413	1848.4	4860.08	9085.59
-0.0159681	-0.0159681	-0.0159681	-0.0159681					1664.09	4435.23	3078.88	5469.71						-0.0239521	-0.0239521	-0.0239521	-0.0239521					1338.61	1516.61	3358.25	6837.42						-0.0399202	-0.0399202	-0.0399202	-0.0399202					1692.67	3333.93	4087.88	7413.68
-0.0159681	-0.0159681	-0.0159681	-0.0159681					979.815	1863.37	2194.58	4607.75						-0.0239521	-0.0239521	-0.0239521	-0.0239521					1811.6	2892.35	5670.57	8458.08						-14.012	-0.0399202	-0.0399202	-0.0399202					731.699	1466.64	3298.61	8865.68
-0.0159681	-0.0159681	-0.0159681	-0.0159681					1765.78	2158.56	3836.06	5251.92						-0.0239521	-0.0239521	-0.0239521	-0.0239521					1043.87	1749.69	3563.77	6523.98						-0.0399202	-0.0399202	-0.0399202	-0.0399202					1474.1	1888.2	3178.69	8428.84
-0.0159681	-0.0159681	-0.0159681	-0.0159681					1076.33	1700.07	2915.2	4727.39						-0.0239521	-0.0239521	-0.0239521	-0.0239521					672.508	1473.94	3247.52	5538.52						-0.0399202	-0.0399202	-0.0399202	-0.0399202					1143.09	1862.46	5447.54	7678.65
-0.0159681	-0.0159681	-0.0159681	-0.0159681					824.299	2310.42	3763.87	6432.85						-0.0239521	-0.0239521	-0.0239521	-0.0239521					756.179	1397.29	4220.14	6375						-0.0399202	-0.0399202	-0.0399202	-0.0399202					1382	2231.34	5149.23	9470.79
-0.0159681	-0.0159681	-0.0159681	-0.0159681					1841.74	2792.11	4295.63	5442.67						-0.0239521	-0.0239521	-0.0239521	-0.0239521					1501.78	1871.62	4036.29	5285.83						-0.0399202	-0.0399202	-0.0399202	-0.0399202					763.805	2784.32	5197.97	8831.49
-0.0159681	-0.0159681	-0.0159681	-0.0159681					1536.14	2471.58	3696.71	5908.24						-0.0239521	-0.0239521	-0.0239521	-0.0239521					1477.61	2044.68	3881.66	7013.84						-0.0399202	-0.0399202	-0.0399202	-0.0399202					1621.04	1694.11	4767.47	8160.77
-0.0159681	-0.0159681	-0.0159681	-0.0159681					1155.08	1615.82	3621.22	6226.79						-0.0239521	-0.0239521	-0.0239521	-0.0239521					865.921	2297.3	3280.94	5931.07						-0.0399202	-0.0399202	-0.0399202	-0.0399202					1543.2	2746.71	2995.29	9920.1
-0.0159681	-0.0159681	-0.0159681	-0.0159681					1101.86	1776.94	2568.53	6135.58						-0.0239521	-0.0239521	-0.0239521	-0.0239521					1713.25	2160.12	4435.85	6777.13						-7.52495	-0.0399202	-0.0399202	-0.0399202					1969.21	1483.28	2872.84	6501.32
-0.0159681	-0.0159681	-0.0159681	-0.0159681					1810.07	3850.98	6346.34	5812.58						-0.0239521	-0.0239521	-0.0239521	-0.0239521					2003.36	5843.47	8176.92	8615.73						-0.0399202	-0.0399202	-0.0399202	-0.0399202					1790.65	1990.64	3632.5	10089.2
-0.0159681	-0.0159681	-0.0159681	-0.0159681					916.626	2070.69	4367.38	6322.15						-0.0239521	-0.0239521	-0.0239521	-0.0239521					1005.46	1678.26	3166.15	6189.79						-0.0399202	-0.0399202	-0.0399202	-0.0399202					1192.26	1884.78	5124.04	7451.5
-0.0159681	-0.0159681	-0.0159681	-0.0159681					1406.14	2591.75	3443.74	4809.19						-0.0239521	-0.0239521	-0.0239521	-0.0239521					1473.46	2104.44	4201.93	7324.51						-0.0399202	-0.0399202	-0.0399202	-0.0399202					940.042	3069.42	6338.5	9310.06
-0.0159681	-0.0159681	-0.0159681	-0.0159681					802.204	2900.99	2620.5	4494.27						-0.0239521	-0.0239521	-0.0239521	-0.0239521					1155.48	2700.85	2771.37	6269.51						-0.0399202	-0.0399202	-0.0399202	-0.0399202					2041.44	4294.09	7681.57	9752.56
-0.0159681	-0.0159681	-0.0159681	-0.0159681					827.406	2082.41	3810.58	4472.3						0.47505	-0.0239521	-0.0239521	-0.0239521					1907.75	3017.33	2706.72	5861.83						-0.0399202	-0.0399202	-0.0399202	-0.0399202					2486.85	6700.84	8419.13	7973.84
-0.0159681	-0.0159681	-0.0159681	-0.0159681					783.669	1249.73	2889.13	4529.97						-0.0239521	-0.0239521	-0.0239521	-0.0239521					1177.74	2524.22	6618.32	6640.08						-0.0399202	-0.0399202	-0.0399202	-0.0399202					1482.5	2201.11	5353.52	8383.07
-0.0159681	-0.0159681	-0.0159681	-0.0159681					631.42	1702.28	2091.96	4586.19						-0.0239521	-0.0239521	-0.0239521	-0.0239521					1168.4	3017.46	4982.34	6813.46						-13.014	-0.0399202	-0.0399202	-0.0399202					1594.81	1865.7	3531.47	9384.63
-0.0159681	-0.0159681	-0.0159681	-0.0159681					716.849	1168.73	3661.33	5206.61						-0.0239521	-0.0239521	-0.0239521	-0.0239521					1128.29	1278.26	2999.75	4806.17						-0.0399202	-0.0399202	-0.0399202	-0.0399202					1055.9	2393.83	3973.76	9242.21
-0.0159681	-0.0159681	-0.0159681	-0.0159681					976.358	1677.32	3587.63	5853.36						-0.0239521	-0.0239521	-0.0239521	-0.0239521					1006.18	1686.25	3672.8	6533.16						-14.012	-0.0399202	-0.0399202	-0.0399202					1161.98	1746.13	5162.29	11972.2
-0.0159681	-0.0159681	-0.0159681	-0.0159681					1498.37	2685.34	4030.71	5314.15						-0.0239521	-0.0239521	-0.0239521	-0.0239521					1343.97	1760.65	2720.79	6271.49						-0.0399202	-0.0399202	-0.0399202	-0.0399202					796.705	2756.81	5433.56	8107.86
-0.0159681	-0.0159681	-0.0159681	-0.0159681					840.563	1951.18	4991.87	7718.39						-0.0239521	-0.0239521	-0.0239521	-0.0239521					978.312	3743.7	5461.98	8886.38						-0.0399202	-0.0399202	-0.0399202	-0.0399202					1355.35	2500.42	6573.22	10621.1
-0.0159681	-0.0159681	-0.0159681	-0.0159681					1082.98	1528.9	3240.05	4551.21						-0.0239521	-0.0239521	-0.0239521	-0.0239521					1897.51	2762.12	4677.88	6300.04						-12.016	-0.0399202	-0.0399202	-0.0399202					1552.01	6527.17	9297.42	12551.7
-0.0159681	-0.0159681	-0.0159681	-0.0159681					549.48	1179.94	2236.88	5532.62						-0.0239521	-0.0239521	-0.0239521	-0.0239521					1327.22	3821.36	7404.45	6360.59						-0.0399202	-0.0399202	-0.0399202	-0.0399202					826.799	2983.15	3367.8	13129.3
-0.0159681	-0.0159681	-0.0159681	-0.0159681					1029.22	1509.17	1897.48	4371.89						-0.0239521	-0.0239521	-0.0239521	-0.0239521					1311.8	3191.03	3207.88	5268.67						-0.0399202	-0.0399202	-0.0399202	-0.0399202					879.242	2219.88	4295.7	12604.6
-0.0159681	-0.0159681	-0.0159681	-0.0159681					1344.55	3194.2	3450.45	4775.2						-0.0239521	-0.0239521	-0.0239521	-0.0239521					1165.09	1640.96	3669.43	5677.5						-0.0399202	-0.0399202	-0.0399202	-0.0399202					726.212	1751.7	3453.74	9113.34
-0.0159681	-0.0159681	-0.0159681	-0.0159681					1191.56	2017.1	2872.42	4230.35						-0.0239521	-0.0239521	-0.0239521	-0.0239521					938.126	1717.1	4204.89	6081.44						-0.0399202	-0.0399202	-0.0399202	-0.0399202					809.284	2150.39	4340.51	7700.34
-0.0159681	-0.0159681	-0.0159681	-0.0159681					419.979	1005.39	2283.52	4223.73						-1.52096	-0.0239521	-0.0239521	-0.0239521					1325.94	2125.4	3937.39	7011						-0.0399202	-0.0399202	-0.0399202	-0.0399202					1323.75	2461.3	5026.2	9790.38
-0.0159681	-0.0159681	-0.0159681	-0.0159681					838.539	1976.59	3387.36	5964.92						-0.0239521	-0.0239521	-0.0239521	-0.0239521					1049.72	3166.41	5242.44	5973.99						-0.0399202	-0.0399202	-0.0399202	-0.0399202					1234.41	1618.16	3570.84	6997.42
-0.0159681	-0.0159681	-0.0159681	-0.0159681					674.52	1453.07	3586.29	5069.37						-0.0239521	-0.0239521	-0.0239521	-0.0239521					1102.13	2326.53	3186.23	6544.82						-0.0399202	-0.0399202	-0.0399202	-0.0399202					1127.61	5640.25	3693.26	7029.74
-0.0159681	-0.0159681	-0.0159681	-0.0159681					1362.53	2091.42	4089.24	7730.23						-0.0239521	-0.0239521	-0.0239521	-0.0239521					1219.79	2012.28	2741.42	6656.09						-0.0399202	-0.0399202	-0.0399202	-0.0399202					966.259	2421	5059.83	12105
-0.0159681	-0.0159681	-0.0159681	-0.0159681					1567.4	2155.03	4783.26	4585.79						-0.0239521	-0.0239521	-0.0239521	-0.0239521					883.446	2131.61	4755.2	5787.21						-0.0399202	-0.0399202	-0.0399202	-0.0399202					1204.55	1949.41	3329.91	7147.48
-0.0159681	-0.0159681	-0.0159681	-0.0159681					1117.77	1911.47	3707.87	4816.22						-0.0239521	-0.0239521	-0.0239521	-0.0239521					830.923	2303.42	3976.79	5689.7						-0.0399202	-0.0399202	-0.0399202	-0.0399202					1411.3	2289.07	5470.84	8765.51
-0.0159681	-0.0159681	-0.0159681	-0.0159681					1263.92	1740.71	2631.4	5987.64						-0.0239521	-0.0239521	-0.0239521	-0.0239521					1320.2	2404.34	3275.87	7553.35						-0.0399202	-0.0399202	-0.0399202	-0.0399202					776.253	2521.48	11399.1	9470.69
-0.0159681	-0.0159681	-0.0159681	-0.0159681					1641.19	2010.63	4845.49	5767.4						-0.0239521	-0.0239521	-0.0239521	-0.0239521					1643.46	1815.32	5166.94	6647.65						-0.0399202	-0.0399202	-0.0399202	-0.0399202					1725.09	2500.46	6270.56	8030.88
-0.0159681	-0.0159681	-0.0159681	-0.0159681					884.91	2350.04	4160.63	5520.29						-0.0239521	-0.0239521	-0.0239521	-0.0239521					2604.3	2859.07	3945.38	6596.91						-0.0399202	-0.0399202	-0.0399202	-0.0399202					877.975	1136.78	3030.82	7827.52
-0.0159681	-0.0159681	-0.0159681	-0.0159681					1475.11	2377.76	4783.25	5423.62						-0.0239521	-0.0239521	-0.0239521	-0.0239521					1972.9	2007.64	3790.81	5382.98						-0.0399202	-0.0399202	-0.0399202	-0.0399202					1357.5	3365.66	5636.82	7400.93
-0.0159681	-0.0159681	-0.0159681	-0.0159681					1235.47	1360.46	2623.84	5032.03						-0.0239521	-0.0239521	-0.0239521	-0.0239521					2637.51	4107.91	3343.28	5997.07						-0.0399202	-0.0399202	-0.0399202	-0.0399202					1278.17	2121.49	3264.51	8256.63
-0.0159681	-0.0159681	-0.0159681	-0.0159681					1458.15	1885.91	2844.76	5302.86						-0.0239521	-0.0239521	-0.0239521	-0.0239521					1478.27	1863.57	2981.4	5370.5						-0.0399202	-0.0399202	-0.0399202	-0.0399202					1596.6	2536.29	8001.37	13643.7
-0.0159681	-0.0159681	-0.0159681	-0.0159681					1271.2	1287.56	2021.23	4165.95						-4.01597	-0.0239521	-0.0239521	-0.0239521					1064.62	3037.88	4443.42	4760.61						-0.0399202	-0.0399202	-0.0399202	-0.0399202					944.684	2577.5	5466.75	9881.28
-0.0159681	-0.0159681	-0.0159681	-0.0159681					1216.46	1956.76	4532.69	4373.4						-0.0239521	-0.0239521	-0.0239521	-0.0239521					1634.69	2334.99	4282.92	8168.42						-0.0399202	-0.0399202	-0.0399202	-0.0399202					923.3	2201	3843.27	10135.8
-0.0159681	-0.0159681	-0.0159681	-0.0159681					945.319	2062.21	3137.33	4713.77						-0.0239521	-0.0239521	-0.0239521	-0.0239521					815.908	1544.82	3704.51	5535.22						-0.0399202	-0.0399202	-0.0399202	-0.0399202					1472.05	2220.28	4296.37	7600.37
-0.0159681	-0.0159681	-0.0159681	-0.0159681					2031.17	2756.08	6747.44	6136.89						-0.0239521	-0.0239521	-0.0239521	-0.0239521					838.005	2646.75	4175.18	6863.2						-0.0399202	-0.0399202	-0.0399202	-0.0399202					1327.42	2307.57	4178.96	12536.2
-0.0159681	-0.0159681	-0.0159681	-0.0159681					1251.96	2522.45	3353.91	6474.42						-0.0239521	-0.0239521	-0.0239521	-0.0239521					1075.49	2423.89	3384.23	7424.4						-0.0399202	-0.0399202	-0.0399202	-0.0399202					2074.26	1891.65	4906.18	7543.17
-0.0159681	-0.0159681	-0.0159681	-0.0159681					2180.94	1552.16	3706.2	4642.87						-0.0239521	-0.0239521	-0.0239521	-0.0239521					1446.88	2540.31	3167.48	7115.56						-0.0399202	-0.0399202	-0.0399202	-0.0399202					1442.48	1854.74	4239.75	8246.09
-0.0159681	-0.0159681	-0.0159681	-0.0159681					1336.54	2365.23	4198.93	7150.86						-0.0239521	-0.0239521	-0.0239521	-0.0239521					1561.38	4626.92	4506.8	5834.29						-0.0399202	-0.0399202	-0.0399202	-0.0399202					964.077	1568.69	4086.63	8956.51
-0.0159681	-0.0159681	-0.0159681	-0.0159681					871.885	1577.24	3702.74	4868.33						-0.0239521	-0.0239521	-0.0239521	-0.0239521					1359.36	1984.45	3048.03	7196.77						-0.0399202	-0.0399202	-0.0399202	-0.0399202					2037.23	2785.31	5777.65	9131.36
-0.0159681	-0.0159681	-0.0159681	-0.0159681					1205.78	2887.35	6274.56	4654.53						-0.0239521	-0.0239521	-0.0239521	-0.0239521					1362.73	4206.61	5456.6	6558.29						-0.0399202	-0.0399202	-0.0399202	-0.0399202					1281.45	2529.03	10703.3	9894.68
-0.0159681	-0.0159681	-0.0159681	-0.0159681					919.816	1286.49	3288.49	4729.67						-0.0239521	-0.0239521	-0.0239521	-0.0239521					1541.16	2077.02	3419.82	6724.5						-0.0399202	-0.0399202	-0.0399202	-0.0399202					1312.3	1765.25	4027.71	5652.56
-0.0159681	-0.0159681	-0.0159681	-0.0159681					834.619	1418.27	2595.77	6515						-0.0239521	-0.0239521	-0.0239521	-0.0239521					1140.91	2234.22	4174.29	7680.28						-0.0399202	-0.0399202	-0.0399202	-0.0399202					1219.31	2904.88	5670.77	7649.04
-0.0159681	-0.0159681	-0.0159681	-0.0159681					1341.9	2361.53	3736.78	4443.83						-0.0239521	-0.0239521	-0.0239521	-0.0239521					1272.62	2104.89	6010.15	4713.09						-0.0399202	-0.0399202	-0.0399202	-0.0399202					1470.24	2024.14	4202.1	7353.3
-0.0159681	-0.0159681	-0.0159681	-0.0159681					1339.33	2167.94	3284.77	4856.65						-0.0239521	-0.0239521	-0.0239521	-0.0239521					1360.76	1987.05	4252.44	6113.31						-0.0399202	-0.0399202	-0.0399202	-0.0399202					1396.11	3228.94	4168.41	8471.97
-0.0159681	-0.0159681	-0.0159681	-0.0159681					1576.71	2176.65	4269.86	4210.45						-0.0239521	-0.0239521	-0.0239521	-0.0239521					1284.72	2534.84	3408.77	6287.5						-0.0399202	-0.0399202	-0.0399202	-0.0399202					1198.71	1841.33	3074.16	6920.32
-0.0159681	-0.0159681	-0.0159681	-0.0159681					924.653	2223.94	3451.19	5286.84						-0.0239521	-0.0239521	-0.0239521	-0.0239521					640.746	1217.12	2631.5	5715.48						-14.012	-0.0399202	-0.0399202	-0.0399202					2152.23	2499.21	6925.78	7801.64
-0.0159681	-0.0159681	-0.0159681	-0.0159681					1336.64	1973.4	4761.37	4888.9						-0.0239521	-0.0239521	-0.0239521	-0.0239521					2184.18	2805.62	5222.33	5935.78						-0.0399202	-0.0399202	-0.0399202	-0.0399202					802.704	1894.64	5326.57	11147.9
-0.0159681	-0.0159681	-0.0159681	-0.0159681					1974.29	3074.74	3750.54	5331.66						-0.0239521	-0.0239521	-0.0239521	-0.0239521					866.396	2149.85	3667.73	6902.85						-0.0399202	-0.0399202	-0.0399202	-0.0399202					961.316	1866.92	3753.33	10117.5
-0.0159681	-0.0159681	-0.0159681	-0.0159681					1435.12	3595.13	4332.5	6719.27						-0.0239521	-0.0239521	-0.0239521	-0.0239521					1077.18	1571.87	3504	5939						-9.02196	-0.0399202	-0.0399202	-0.0399202					1196.15	3013.41	4946.64	12078.3
-0.0159681	-0.0159681	-0.0159681	-0.0159681					1095.55	1847.38	2761.05	6271.75						-0.0239521	-0.0239521	-0.0239521	-0.0239521					1036.03	1599.3	4524.44	8691.72						-0.0399202	-0.0399202	-0.0399202	-0.0399202					1961.66	3607.98	5382.35	10352.1
-0.0159681	-0.0159681	-0.0159681	-0.0159681					1547.93	3757.36	4182.29	5467.71						-0.0239521	-0.0239521	-0.0239521	-0.0239521					1402.75	3187.76	3419.39	6341.2						-0.0399202	-0.0399202	-0.0399202	-0.0399202					1086.26	1773.22	5921.8	9366.22
-0.0159681	-0.0159681	-0.0159681	-0.0159681					1238.72	2137.24	3879.41	6028.18						-0.0239521	-0.0239521	-0.0239521	-0.0239521					848.526	1930.73	3874.02	6273.39						-14.012	-0.0399202	-0.0399202	-0.0399202					735.357	1391.69	3949.34	9425.34
-0.0159681	-0.0159681	-0.0159681	-0.0159681					1288.83	1460.2	2458.34	6140.74						-0.0239521	-0.0239521	-0.0239521	-0.0239521					1108.59	2312.48	3575.63	5681.38						-0.0399202	-0.0399202	-0.0399202	-0.0399202					1672.06	3283.4	5261.42	12152.7
-0.0159681	-0.0159681	-0.0159681	-0.0159681					1635.43	2333.45	4932.15	5809.07						-0.0239521	-0.0239521	-0.0239521	-0.0239521					1793.88	4164.59	10690.1	7229.44						-0.0399202	-0.0399202	-0.0399202	-0.0399202					1576.24	6467.96	6482.46	9496.51
-0.0159681	-0.0159681	-0.0159681	-0.0159681					984.513	2279.67	3045.89	4382.77						-0.0239521	-0.0239521	-0.0239521	-0.0239521					2107.06	2462.57	5169.38	4376.59						-0.0399202	-0.0399202	-0.0399202	-0.0399202					919.692	2491.61	3872	11298.2
-0.0159681	-0.0159681	-0.0159681	-0.0159681					973.911	2191.28	2923.47	4360.69						-0.0239521	-0.0239521	-0.0239521	-0.0239521					848.857	1690.9	3886.93	6143.9						-0.0399202	-0.0399202	-0.0399202	-0.0399202					1240.03	2734.64	7493.27	9992.8
-0.0159681	-0.0159681	-0.0159681	-0.0159681					1861.72	3165.5	3770.75	4524.39						-0.0239521	-0.0239521	-0.0239521	-0.0239521					758.642	1314.78	2743.88	5995.25						-0.0399202	-0.0399202	-0.0399202	-0.0399202					1191.16	3944.58	11927.6	12701
-0.0159681	-0.0159681	-0.0159681	-0.0159681					866.009	3036.56	5071.95	4906.97						-0.0239521	-0.0239521	-0.0239521	-0.0239521					954.342	2308.12	4353.43	7128.39						-0.0399202	-0.0399202	-0.0399202	-0.0399202					796.677	1756.03	5328.34	12595.9
-0.0159681	-0.0159681	-0.0159681	-0.0159681					764.1	1110.77	2212.32	5324.52						-0.0239521	-0.0239521	-0.0239521	-0.0239521					1820.66	2722.99	3835.76	5482.69						-0.0399202	-0.0399202	-0.0399202	-0.0399202					1342.38	2567.92	3357.22	9655.96
-0.0159681	-0.0159681	-0.0159681	-0.0159681					1000.97	1730.6	2643.32	4422.44						-0.0239521		-0.0239521	-0.0239521					568.673	1551.55	3131.82	5877.26						-0.0399202	-0.0399202	-0.0399202	-0.0399202					1716.74	5394.14	9078.07	10206.3
-0.0159681	-0.0159681	-0.0159681	-0.0159681					1248.69	3060.28	3812.48	6068.47						-0.0239521		-0.0239521	-0.0239521					612.571	1861.51	2961.11	6130.31						-0.0399202	-0.0399202	-0.0399202	-0.0399202					1259.33	3127.3	4570.89	11613.6
-0.0159681	-0.0159681	-0.0159681	-0.0159681					1032.58	1647.5	2800.64	5587.38						-0.0239521		-0.0239521	-0.0239521					1027.33	1798.62	2347.86	5257.69						-0.0399202	-0.0399202	-0.0399202	-0.0399202					1353.35	2437.68	11134.1	12779.6
-0.0159681	-0.0159681	-0.0159681	-0.0159681					1146.43	2220.49	4553.77	5176.65						-0.0239521		-0.0239521	-0.0239521					778.224	1791.85	2884.95	4523.03						-0.0399202	-0.0399202	-0.0399202	-0.0399202					1261.43	3550.18	6243.01	9032.57
-0.0159681	-0.0159681	-0.0159681	-0.0159681					1164.36	2046.27	4975.14	5682.9								-0.0239521	-0.0239521					1166	1624.32	3971.31	6460.34						-0.0399202	-0.0399202	-0.0399202	-0.0399202					1003.71	1618.82	5223.09	12786.3
-0.0159681	-0.0159681	-0.0159681	-0.0159681					570.834	1193.13	2761.59	5246.28								-0.0239521	-0.0239521					1113.32	1654.58	3191.3	5908.28						-0.0399202	-0.0399202	-0.0399202	-0.0399202					1016.91	2172.91	5613.47	6551.42
-0.0159681	-0.0159681	-0.0159681	-0.0159681					2154.03	2806.42	3707.98	4889.57									-0.0239521					1067.79	2398.35	5969.54	7761.82						-0.0399202	-0.0399202	-0.0399202	-0.0399202					1349.77	3040.76	5419.42	9632.9
								Table Analyzed	Vibration 8 Hz Xcorr SNR																Table Analyzed	Vibration 12 Hz Xcorr SNR																Table Analyzed	Vibration 20 Hz Xcorr SNR
								Friedman test																	Friedman test																	Friedman test
								P value	<0.0001																P value	<0.0001																P value	<0.0001
								Exact or approximate P value?	Approximate																Exact or approximate P value?	Approximate																Exact or approximate P value?	Approximate
								P value summary	****																P value summary	****																P value summary	****
								Are means signif. different? (P < 0.05)	Yes																Are means signif. different? (P < 0.05)	Yes																Are means signif. different? (P < 0.05)	Yes
								Number of groups	4																Number of groups	4																Number of groups	4
								Friedman statistic	285.4																Friedman statistic	288.2																Friedman statistic	290.5
								Data summary																	Data summary																	Data summary
								Number of treatments (columns)	4																Number of treatments (columns)	4																Number of treatments (columns)	4
								Number of subjects (rows)	100																Number of subjects (rows)	100																Number of subjects (rows)	100
								Multiple comparison																	Multiple comparison																	Multiple comparison
								Number of families	1																Number of families	1																Number of families	1
								Number of comparisons per family	6																Number of comparisons per family	6																Number of comparisons per family	6
								Alpha	0.05																Alpha	0.05																Alpha	0.05
								Dunn's multiple comparisons test	Rank sum diff.	Significant?	Summary	Adjusted P Value													Dunn's multiple comparisons test	Rank sum diff.	Significant?	Summary	Adjusted P Value													Dunn's multiple comparisons test	Rank sum diff.	Significant?	Summary	Adjusted P Value
								Xcorr 10% vs. Xcorr 20%	-100	Yes	****	<0.0001	A-B												Xcorr 10% vs. Xcorr 20%	-102	Yes	****	<0.0001	A-B												Xcorr 10% vs. Xcorr 20%	-98	Yes	****	<0.0001	A-B
								Xcorr 10% vs. Xcorr 40%	-207	Yes	****	<0.0001	A-C												Xcorr 10% vs. Xcorr 40%	-200	Yes	****	<0.0001	A-C												Xcorr 10% vs. Xcorr 40%	-200	Yes	****	<0.0001	A-C
								Xcorr 10% vs. Xcorr 80%	-289	Yes	****	<0.0001	A-D												Xcorr 10% vs. Xcorr 80%	-294	Yes	****	<0.0001	A-D												Xcorr 10% vs. Xcorr 80%	-294	Yes	****	<0.0001	A-D
								Xcorr 20% vs. Xcorr 40%	-107	Yes	****	<0.0001	B-C												Xcorr 20% vs. Xcorr 40%	-98	Yes	****	<0.0001	B-C												Xcorr 20% vs. Xcorr 40%	-102	Yes	****	<0.0001	B-C
								Xcorr 20% vs. Xcorr 80%	-189	Yes	****	<0.0001	B-D												Xcorr 20% vs. Xcorr 80%	-192	Yes	****	<0.0001	B-D												Xcorr 20% vs. Xcorr 80%	-196	Yes	****	<0.0001	B-D
								Xcorr 40% vs. Xcorr 80%	-82	Yes	****	<0.0001	C-D												Xcorr 40% vs. Xcorr 80%	-94	Yes	****	<0.0001	C-D												Xcorr 40% vs. Xcorr 80%	-94	Yes	****	<0.0001	C-D
								Test details	Rank sum 1	Rank sum 2	Rank sum diff.	n1	n2												Test details	Rank sum 1	Rank sum 2	Rank sum diff.	n1	n2												Test details	Rank sum 1	Rank sum 2	Rank sum diff.	n1	n2
								Xcorr 10% vs. Xcorr 20%	101	201	-100	100	100												Xcorr 10% vs. Xcorr 20%	101	203	-102	100	100												Xcorr 10% vs. Xcorr 20%	102	200	-98	100	100
								Xcorr 10% vs. Xcorr 40%	101	308	-207	100	100												Xcorr 10% vs. Xcorr 40%	101	301	-200	100	100												Xcorr 10% vs. Xcorr 40%	102	302	-200	100	100
								Xcorr 10% vs. Xcorr 80%	101	390	-289	100	100												Xcorr 10% vs. Xcorr 80%	101	395	-294	100	100												Xcorr 10% vs. Xcorr 80%	102	396	-294	100	100
								Xcorr 20% vs. Xcorr 40%	201	308	-107	100	100												Xcorr 20% vs. Xcorr 40%	203	301	-98	100	100												Xcorr 20% vs. Xcorr 40%	200	302	-102	100	100
								Xcorr 20% vs. Xcorr 80%	201	390	-189	100	100												Xcorr 20% vs. Xcorr 80%	203	395	-192	100	100												Xcorr 20% vs. Xcorr 80%	200	396	-196	100	100
								Xcorr 40% vs. Xcorr 80%	308	390	-82	100	100												Xcorr 40% vs. Xcorr 80%	301	395	-94	100	100												Xcorr 40% vs. Xcorr 80%	302	396	-94	100	100

## Sheet: FigS6
8Hz Polarity Index						12Hz Polarity Index						20Hz Polarity Index						15Hz Polarity Index						10Hz Polarity Index
8 Hz	8 Hz (Shuffle)					12 Hz	12 Hz (Shuffle)					20 Hz	20 Hz (Shuffle)					15 Hz	15 Hz (Shuffle)					10 Hz	10 Hz (Shuffle)
0.025167	0.0202528					0.0427955	0.0209014					0.030884	0.0263746					0.0239138	0.0246155					0.034238	0.0209295
0.0292151	0.0277372					0.0252619	0.0293888					0.029168	0.0222177					0.0286594	0.0213213					0.024436	0.0221457
0.0364041	0.0171771					0.0660269	0.0161035					0.024307	0.0208257					0.028797	0.0210481					0.0275062	0.019507
0.0467602	0.0207543					0.0401227	0.0232928					0.0327514	0.0191194					0.0460691	0.0275221					0.0201633	0.0237834
0.00340032	0.0245458					0.0264526	0.0219845					0.034287	0.0210994					0.0154113	0.0154556					0.0188588	0.0170441
0.0316073	0.0337051					0.0282868	0.0249617					0.0119192	0.0190998					0.0198773	0.0198596					0.0544855	0.0277998
0.0207295	0.023577					0.0400884	0.0163213					0.0367118	0.0234169					0.0172104	0.0222442					0.0444559	0.0227585
0.00431986	0.0288842					0.0210973	0.0226374					0.0261595	0.0178279					0.0192345	0.0213583					0.0376704	0.0219012
0.0115247	0.027716					0.0266627	0.0276231					0.014611	0.0235876					0.00429489	0.0176319					0.0527102	0.0295952
0.0373408	0.0243626					0.0276023	0.023968					0.00824023	0.025294					0.0335683	0.0231253					0.0409612	0.0264032
0.015075	0.0190897					0.0252123	0.0243199					0.00847084	0.0196059					0.0165447	0.0178016					0.0330916	0.0209095
0.0264284	0.0217176					0.0380203	0.0233276					0.0222329	0.0232538					0.0218408	0.0228671					0.0622384	0.0212668
0.029989	0.0249536					0.0441612	0.0237488					0.0132255	0.0246497					0.0032783	0.0240472					0.0444138	0.0180868
0.0100721	0.0301801					0.0103928	0.0228028					0.0183741	0.0246831					0.0169192	0.0303932					0.0344694	0.0185143
0.02926	0.0236768					0.0385845	0.0295496					0.0142904	0.0203009					0.0311407	0.0255602					0.0590148	0.0229485
0.0322054	0.0211748					0.0376062	0.029506					0.0272981	0.0185263					0.0167727	0.0228253					0.05188	0.0141177
0.0170202	0.0253645					0.0281451	0.0246908					0.0283893	0.0211905					0.0232692	0.0249123					0.0285767	0.0211505
0.0227466	0.0247543					0.0188842	0.0261599					0.024469	0.0227093					0.0870066	0.0157143					0.0477051	0.0183931
0.0322027	0.0241539					0.025071	0.0254967					0.0242069	0.0222005					0.0242417	0.0222558					0.0209787	0.0216197
0.0435453	0.0237584					0.0280428	0.0240683					0.0305246	0.0214622					0.0279869	0.0234779					0.03332	0.0194291
0.20153	0.0154938					0.148738	0.0203841					0.129798	0.0216959					0.186099	0.0205185					0.131653	0.0230968
0.0664718	0.0186109					0.0350481	0.0215423					0.0601002	0.02386					0.0669762	0.0286994					0.0253876	0.0220127
0.0675747	0.0200478					0.0554814	0.0189451					0.015487	0.0252334					0.0434123	0.0284132					0.0554318	0.0197473
0.0528222	0.0222853					0.0195543	0.0278608					0.0290691	0.0158312					0.0194626	0.0124					0.0325557	0.0205484
0.153641	0.0251904					0.117821	0.0234719					0.128799	0.0302021					0.189552	0.0299567					0.119818	0.0247425
0.0329256	0.0171271					0.0426534	0.0244719					0.0465523	0.0225196					0.0172203	0.0220392					0.04282	0.0231295
0.0404823	0.0260725					0.0458714	0.021006					0.0420909	0.0189672					0.0336057	0.0239365					0.0365055	0.023317
0.0417602	0.020609					0.0696087	0.0235151					0.036478	0.0243266					0.0307788	0.0173203					0.0316435	0.0205114
0.036643	0.0248834					0.0352815	0.0226803					0.0337703	0.0253884					0.0224706	0.0247398					0.029978	0.0306897
0.0276271	0.0265933					0.0234067	0.0223137					0.0272235	0.0262704					0.0184722	0.0209759					0.0314661	0.021829
0.0642256	0.0278893					0.047044	0.0286752					0.0191044	0.0252581					0.00456755	0.0271851					0.0163311	0.023195
0.157081	0.0372678					0.110952	0.0239358					0.0283902	0.017704					0.032831	0.018927					0.0803954	0.0195249
0.152414	0.0306117					0.127514	0.0205516					0.0869794	0.0260203					0.0647968	0.0244001					0.151241	0.0246093
0.0305563	0.0203602					0.0263155	0.0228139					0.00708793	0.0266488					0.0126809	0.0242982					0.0285114	0.0348467
0.0942281	0.0282068					0.0487477	0.0216683					0.0393165	0.0220968					0.0365491	0.0248466					0.0702314	0.0267203
0.150575	0.0267991					0.116776	0.0311565					0.0646653	0.0253727					0.051677	0.0279567					0.136613	0.0228306
0.0461746	0.0292187					0.021404	0.0219089					0.0330336	0.0265331					0.018518	0.0269425					0.0425299	0.0210737
0.0899558	0.0272529					0.0717972	0.0229549					0.0564755	0.0224392					0.0349044	0.0275657					0.0824876	0.0184602
0.0288782	0.0216062					0.0397716	0.0326501					0.0117134	0.0193469					0.0149409	0.0252501					0.0303993	0.0232654
0.200535	0.028642					0.136267	0.025906					0.108734	0.0261572					0.102519	0.0256629					0.192989	0.0241745
0.226501	0.0306012					0.143188	0.0286803					0.0925242	0.0266658					0.0897944	0.0222022					0.174223	0.0193814
0.29433	0.0193705					0.256619	0.0186766					0.182633	0.0278719					0.1615	0.0235116					0.2889	0.0450276
0.00986719	0.0245253					0.0424459	0.0327636					0.02567	0.0215377					0.00762097	0.0227186					0.0178402	0.0255656
0.107019	0.0220387					0.0777025	0.0298919					0.0539678	0.0230011					0.0645899	0.0217904					0.0893275	0.023189
0.0690073	0.0139417					0.0432926	0.0246096					0.0415433	0.0319885					0.0153872	0.022874					0.0579783	0.0240139
0.0647728	0.0303882					0.0499076	0.0235727					0.012128	0.0213686					0.0150675	0.0234915					0.0393699	0.025804
0.0574192	0.0335953					0.0301421	0.0277207					0.0306037	0.0288339					0.0160143	0.0241125					0.0420957	0.0205164
0.00969847	0.0254573					0.0144344	0.0265582					0.0160854	0.0304311					0.0200592	0.0259412					0.0359869	0.0307116
0.0734798	0.0250575					0.0435134	0.0305886					0.0307415	0.029119					0.0186247	0.0300844					0.0464013	0.0290721
0.0732218	0.0188132					0.0552313	0.020752					0.0201065	0.028085					0.0168695	0.0249616					0.0539126	0.0297188
0.0457007	0.0278697					0.0289697	0.0284745					0.0110663	0.0246432					0.0225269	0.0242025					0.0396833	0.02697
0.103165	0.0300372					0.0921041	0.0274812					0.0527649	0.0242273					0.059476	0.0234699					0.095777	0.0320558
0.0561882	0.0279146					0.0219582	0.022269					0.0221143	0.0215498					0.0371473	0.029992					0.0373948	0.0258898
0.118591	0.0219939					0.0788342	0.0223849					0.0342799	0.0232705					0.0358039	0.0283164					0.117929	0.0230919
0.186757	0.014796					0.161075	0.0309924					0.106038	0.0279164					0.0969459	0.0144832					0.170134	0.0202304
0.0377949	0.0315879					0.0112469	0.0279166					0.0404071	0.0292579					0.0181584	0.0213927					0.0385729	0.0274275
0.0724943	0.0228206					0.0493425	0.0263993					0.0527795	0.0225088					0.0307434	0.0248923					0.0905274	0.0245854
0.168616	0.0255791					0.0928929	0.0269453					0.0811933	0.0211431					0.0714408	0.0221736					0.162696	0.0231352
0.0315722	0.0532451					0.0139022	0.0481248					0.00608236	0.0573204					0.0299552	0.0452274					0.0357704	0.0475073
0.148789	0.0497753					0.0756671	0.0510542					0.0373346	0.0490533					0.0775921	0.056833					0.0533724	0.056733
0.167589	0.0511042					0.102004	0.0427867					0.0773796	0.0549608					0.120475	0.0452299					0.0652771	0.0471604
0.0348977	0.048433					0.00764285	0.0484107					0.0209367	0.0476196					0.0231135	0.0515238					0.0494637	0.0526763
0.12212	0.0463407					0.0688588	0.0478066					0.0217857	0.049293					0.0810495	0.0473726					0.0675246	0.0439282
0.153276	0.0453512					0.120441	0.0487691					0.0793272	0.0524999					0.122941	0.05111					0.0720434	0.0455693
0.0635379	0.0524101					0.0439111	0.0497336					0.0111357	0.0493361					0.0313793	0.0483614					0.0495948	0.0506165
0.106639	0.0500302					0.0952024	0.0506639					0.0474538	0.0462217					0.104615	0.0458341					0.0622566	0.0528021
0.078104	0.0493716					0.0251545	0.0507378					0.0313813	0.0510837					0.0212875	0.0488431					0.0445399	0.0502983
0.0728357	0.0495048					0.0331765	0.0498102					0.0237379	0.0474844					0.0441476	0.0520974					0.0363577	0.0459214
0.21344	0.0505674					0.14039	0.0517823					0.0745297	0.0492511					0.16285	0.050614					0.0986109	0.0505774
0.0323849	0.0472955					0.0230592	0.0527301					0.0397239	0.0535459					0.0158975	0.0463789					0.0393227	0.0510401
0.109717	0.0497489					0.0481706	0.0464629					0.00716507	0.0543635					0.065726	0.0531654					0.0435678	0.0469611
0.0891457	0.0488867					0.0878406	0.0514756					0.04158	0.0470166					0.0734079	0.0465962					0.0707709	0.0538403
0.0866421	0.0534896					0.0340539	0.0450868					0.0279843	0.043995					0.0539263	0.0449161					0.0448786	0.0429666
0.0774029	0.0537087					0.0357394	0.04225					0.0523889	0.0499396					0.0626816	0.0494069					0.0583607	0.0563243
0.0374076	0.049787					0.0101804	0.0436915					0.00568549	0.0481326					0.0152577	0.04783					0.0468483	0.049056
0.0637739	0.0550106					0.0354518	0.0501826					0.0175742	0.0522201					0.0356998	0.0487512					0.044124	0.0540332
0.18515	0.0435244					0.131206	0.049967					0.0775607	0.0550449					0.14946	0.0565313					0.0792415	0.055073
0.091316	0.0456669					0.0545073	0.0501906					0.0517803	0.0459213					0.0612704	0.0481201					0.0707579	0.0484589
0.0556825	0.0465388					0.00968177	0.0474505					0.0285494	0.0425286					0.0108781	0.0500348					0.0340932	0.0473699
0.104556	0.0467872					0.0910842	0.0496899					0.0514734	0.050854					0.0978212	0.0425297					0.0574823	0.0503661
0.186245	0.0482897					0.114228	0.0590573					0.0775645	0.0428136					0.12419	0.0496779					0.112172	0.0395593
0.0198538	0.0491973					0.00995415	0.0525911					0.0237725	0.0435153					0.0246594	0.0475775					0.0563161	0.0525766
0.097183	0.0515293					0.0502529	0.0513682					0.0238169	0.046783					0.0645063	0.0471633					0.0579146	0.0567544
0.153495	0.0491323					0.105819	0.0501494					0.0644933	0.0533903					0.111424	0.0511142					0.0641763	0.05185
0.028638	0.0548397					0.0284879	0.0518193					0.0233991	0.0468227					0.0380995	0.0509993					0.036119	0.0523525
0.105306	0.0469777					0.0538744	0.0449069					0.0291338	0.0539281					0.0829136	0.0465146					0.0562477	0.0520323
0.138979	0.0524062					0.12175	0.0508145					0.0743894	0.0455663					0.128781	0.0528589					0.101306	0.0508498
0.0775918	0.00155633					0.0482895	0.0042419					0.0303749	0.0119982					0.101668	0.0111388					0.0641303	0.015729
0.0617679	0.00427676					0.0440162	0.0086731					0.0234807	0.00926901					0.113722	0.0148054					0.0822274	0.00881015
0.0316604	0.00868571					0.022071	0.00514515					0.00988627	0.0101468					0.0216758	0.00768311					0.0126391	0.012069
0.031562	0.00605736					0.00362857	0.00717487					0.012882	0.012852					0.0223734	0.00831973					0.0147308	0.00810219
0.0336013	0.0109605					0.0286182	0.013262					0.00742957	0.00912217					0.0393536	0.00199822					0.0276796	0.0156576
0.0471939	0.0102026					0.0237627	0.00476233					0.0345433	0.0174378					0.0291568	0.0212168					0.00842749	0.00933264
0.0253408	0.0101165					0.0161111	0.00929262					0.0141407	0.00678093					0.0420513	0.0149073					0.0199708	0.00700552
0.0344812	0.00135013					0.0146708	0.00407382					0.0491709	0.00101918					0.0691931	0.00697089					0.0532359	0.00640294
0.0255492	0.00271106					0.021263	0.0155166					0.00952104	0.00763051					0.0514263	0.00925846					0.0350925	0.0171348
0.0250854	0.00743949					0.0148358	0.0161885					0.021603	0.0089867					0.0649838	0.00764794					0.0260105	0.00684305
0.0341099	0.00184349					0.0166264	0.014307					0.0136729	0.0120911					0.0714811	0.00452754					0.0126858	0.0113919
0.0171816	0.0107729					0.0261746	0.0108537					0.0161055	0.00573017					0.037495	0.0179658					0.0244917	0.0017722
0.0353294	0.0065102					0.0222803	0.00333515					0.0132276	0.0033742					0.0618751	0.0141934					0.0148719	0.0109144
0.0308549	0.00948436					0.0149971	0.00675395					0.0127167	0.00920419					0.047675	0.00481068					0.0377338	0.00624918
0.0474881	0.00754781					0.024027	0.00689139					0.0194739	0.00188042					0.0656854	0.00518796					0.0541966	0.00391712
0.0278512	0.0128052					0.0268568	0.0138449					0.00606326	0.00458817					0.0669502	0.0102777					0.0286914	0.011135
0.0231862	0.00346352					0.0184016	0.00650106					0.0395581	0.00656876					0.0452176	0.0116777					0.0116498	0.00433302
0.0147735	0.0112393					0.017784	0.00241778					0.0333893	0.0105998					0.0330142	0.0119726					0.0218228	0.0045549
0.0187536	0.00817898					0.00418998	0.00419168					0.00501036	0.0109982					0.0558617	0.00727916					0.0267769	0.0107143
0.00629624	0.00689264					0.0181766	0.0029412					0.0174176	0.00778941					0.0365747	0.00520857					0.00407608	0.00613618
0.0129787	0.00144703					0.011024	0.00754314					0.00784994	0.00310788					0.0329594	0.00584321					0.0125702	0.0114588
0.0232692	0.00741691					0.0169428	0.00457483					0.0110168	0.00982343					0.0470096	0.0138887					0.026433	0.00588686
0.0218662	0.0117473					0.0372971	0.0018082					0.0476001	0.00216921					0.0560065	0.00847091					0.0368906	0.0107038
0.0551181	0.0119341					0.0375592	0.0135973					0.0249169	0.0138153					0.00757978	0.00982429					0.0369406	0.0197733
0.00506163	0.00757424					0.0157211	0.0133696					0.0319447	0.00803534					0.034403	0.0127862					0.0165199	0.0163055
0.0580959	0.00361717					0.00486819	0.00898036					0.0128032	0.0128942					0.0218988	0.0150748					0.0399615	0.00891946
0.0250582	0.0167014					0.022038	0.0110188					0.0333173	0.0118336					0.0238264	0.012236					0.00374934	0.00849212
0.047755	0.0117968					0.0231004	0.00681417					0.021633	0.0203228					0.0392072	0.0182498					0.0279909	0.0135524
0.00546822	0.0162359					0.0271753	0.016138					0.00683382	0.014287					0.0194666	0.0243555					0.0133099	0.0212034
0.0550166	0.0161116					0.0173274	0.014237					0.0116364	0.0139457					0.0198973	0.0159748					0.00871419	0.0119017
0.0630519	0.0226665					0.0702491	0.0133632					0.0329162	0.016486					0.0459556	0.0157179					0.0415728	0.0157995
0.0238128	0.0101289					0.00833663	0.0164466					0.0207351	0.00994724					0.0143069	0.0159667					0.00940811	0.0174457
0.0422173	0.0101021					0.00860296	0.010025					0.0139263	0.0149649					0.0352709	0.0165065					0.0265598	0.0142789
0.0271425	0.012845					0.0109539	0.0148242					0.025321	0.0139594					0.0256491	0.0177073					0.0103874	0.0156432
0.0263381	0.0126635					0.0199451	0.0134983					0.0161144	0.015057					0.0179464	0.0144085					0.0234379	0.013346
0.0431534	0.0106064					0.015194	0.0198217					0.0239905	0.014369					0.00489846	0.0101243					0.0131985	0.0177064
0.0412743	0.0134932					0.00855349	0.0113703					0.0101539	0.0155343					0.0272751	0.0141635					0.0324151	0.0180912
0.0224833	0.0151548					0.0377187	0.0159077					0.020785	0.0152648					0.0226592	0.0167836					0.0255506	0.0162432
0.037945	0.0149695					0.039265	0.0134557					0.0182674	0.0142534					0.0240758	0.0113688					0.0213201	0.0146927
0.0868442	0.0137463					0.107355	0.0145662					0.0558834	0.0161515					0.0673015	0.0165688					0.0419541	0.0160107
0.0425164	0.0177947					0.00440951	0.0120197					0.0264943	0.0125406					0.0223926	0.0153616					0.0120681	0.0146531
0.0218361	0.0131467					0.00341236	0.0124928					0.0313297	0.0193677					0.0149976	0.0161144					0.0136429	0.0118224
0.0160435	0.0177562					0.0116667	0.0150692					0.0164142	0.0130844					0.0139244	0.0182099					0.0128128	0.0130148
0.014673	0.0127658					0.00689805	0.0171482					0.0301805	0.0116545					0.0221356	0.0134628					0.0338945	0.0147117
0.0289506	0.016562					0.0167394	0.0214273					0.0307451	0.0170641					0.00704275	0.0134182					0.0191916	0.0133306
0.015177	0.0123548					0.00223702	0.0164533					0.018475	0.015195					0.0124899	0.0160747					0.0116115	0.01347
0.0314675	0.0156265					0.0138484	0.0178858					0.0218727	0.0188007					0.0132822	0.0120078					0.0258435	0.0141585
0.0297092	0.0205031					0.0333871	0.0159641					0.0145719	0.0175282					0.0209878	0.0151162					0.00160244	0.0187701
0.00243059	0.0117624					0.0143742	0.0129201					0.0147338	0.0173943					0.0111273	0.015997					0.00830907	0.0135151
0.0336416	0.0165418					0.0326828	0.0169627					0.0334342	0.0141848					0.0335918	0.0149629					0.0201253	0.0161992
0.0418234	0.0124883					0.0160059	0.0122166					0.0394792	0.0151347					0.0542122	0.0191739					0.03349	0.016297
Table Analyzed	8Hz					Table Analyzed	12 Hz					Table Analyzed	20 Hz					Table Analyzed	15 Hz					Table Analyzed	10 Hz
Column B	8 Hz (Shuffle)					Column B	12 Hz (Shuffle)					Column B	20 Hz (Shuffle)					Column B	15 Hz (Shuffle)					Column B	10 Hz (Shuffle)
vs.	vs.					vs.	vs.					vs.	vs.					vs.	vs.					vs.	vs.
Column A	8 Hz					Column A	12 Hz					Column A	20 Hz					Column A	15 Hz					Column A	10 Hz
Wilcoxon matched-pairs signed rank test						Wilcoxon matched-pairs signed rank test						Wilcoxon matched-pairs signed rank test						Wilcoxon matched-pairs signed rank test						Wilcoxon matched-pairs signed rank test
P value	<0.0001					P value	<0.0001					P value	<0.0001					P value	<0.0001					P value	<0.0001
Exact or approximate P value?	Exact					Exact or approximate P value?	Exact					Exact or approximate P value?	Exact					Exact or approximate P value?	Exact					Exact or approximate P value?	Exact
P value summary	****					P value summary	****					P value summary	****					P value summary	****					P value summary	****
Significantly different (P < 0.05)?	Yes					Significantly different (P < 0.05)?	Yes					Significantly different (P < 0.05)?	Yes					Significantly different (P < 0.05)?	Yes					Significantly different (P < 0.05)?	Yes
One- or two-tailed P value?	Two-tailed					One- or two-tailed P value?	Two-tailed					One- or two-tailed P value?	Two-tailed					One- or two-tailed P value?	Two-tailed					One- or two-tailed P value?	Two-tailed
Sum of positive, negative ranks	821.0 , -8770					Sum of positive, negative ranks	1959 , -7632					Sum of positive, negative ranks	2954 , -6637					Sum of positive, negative ranks	2028 , -7563					Sum of positive, negative ranks	1030 , -8561
Sum of signed ranks (W)	-7949					Sum of signed ranks (W)	-5673					Sum of signed ranks (W)	-3683					Sum of signed ranks (W)	-5535					Sum of signed ranks (W)	-7531
Number of pairs	138					Number of pairs	138					Number of pairs	138					Number of pairs	138					Number of pairs	138
Number of ties (ignored)	0					Number of ties (ignored)	0					Number of ties (ignored)	0					Number of ties (ignored)	0					Number of ties (ignored)	0
Median of differences						Median of differences						Median of differences						Median of differences						Median of differences
Median	-0.02274					Median	-0.01081					Median	-0.005131					Median	-0.00934					Median	-0.01284
How effective was the pairing?						How effective was the pairing?						How effective was the pairing?						How effective was the pairing?						How effective was the pairing?
rs (Spearman)	0.4493					rs (Spearman)	0.4473					rs (Spearman)	0.348					rs (Spearman)	0.1645					rs (Spearman)	0.5801
P value (one tailed)	<0.0001					P value (one tailed)	<0.0001					P value (one tailed)	<0.0001					P value (one tailed)	0.027					P value (one tailed)	<0.0001
P value summary	****					P value summary	****					P value summary	****					P value summary	*					P value summary	****
Was the pairing significantly effective?	Yes					Was the pairing significantly effective?	Yes					Was the pairing significantly effective?	Yes					Was the pairing significantly effective?	Yes					Was the pairing significantly effective?	Yes

## Sheet: FigS7
8Hz Polarity Index						12Hz Polarity Index						16Hz Polarity Index						20Hz Polarity Index						15Hz Polarity Index						10Hz Polarity Index
8 Hz	8 Hz (Shuffled)					12Hz	12Hz (Shuffle)					16Hz	16Hz (Shuffle)					20Hz	20Hz (Shuffle)					15Hz	15Hz (Shuffle)					10Hz	10Hz (Shuffle)
0.00758283	0.0124831					0.0113695	0.0173799					0.0188635	0.0144839					0.0231773	0.0162718					0.0146608	0.00579099					0.0147409	0.0103372
0.0150984	0.000604229					0.03106	0.0124391					0.0101575	0.0107815					0.0149649	0.0290103					0.0195848	0.0247066					0.0163524	0.0165402
0.0155332	0.007589					0.0158553	0.00194289					0.00467358	0.0123608					0.0186192	0.0172841					0.0186989	0.0203307					0.00403894	0.0138668
0.0142031	0.00676875					0.00457689	0.0170438					0.00724272	0.0149507					0.0135751	0.0167657					0.0352673	0.0231709					0.00415142	0.0327503
0.109644	0.0536183					0.0449487	0.0271144					0.0360649	0.054207					0.034244	0.0465751					0.0262559	0.0658826					0.0405381	0.0223701
0.0253236	0.0374611					0.018947	0.0337132					0.0791709	0.0483838					0.0454624	0.032162					0.0224327	0.0431593					0.0324393	0.0188545
0.0610568	0.00837985					0.00509817	0.0256117					0.0386463	0.0164033					0.0723445	0.0435515					0.0226041	0.0374948					0.0313814	0.0378296
0.0208396	0.0523654					0.0570009	0.04842					0.0446205	0.0349717					0.010441	0.0210517					0.0096722	0.0567579					0.0164113	0.0448922
0.0497811	0.0260951					0.0525626	0.0240495					0.0121648	0.0110324					0.0225655	0.0262796					0.00702993	0.0204826					0.0207446	0.0204904
0.00291554	0.0477893					0.0291249	0.0439881					0.0231169	0.0345133					0.0565633	0.00810858					0.0209872	0.0521326					0.0350123	0.0218283
0.0217934	0.0267886					0.0340144	0.00796311					0.0280378	0.0199728					0.0444021	0.00886045					0.00814036	0.011331					0.0271084	0.0268423
0.0177159	0.0457975					0.0542289	0.0110322					0.0175975	0.0130619					0.0169674	0.0345271					0.0166359	0.0382306					0.056354	0.0137659
0.0163661	0.0456411					0.0535289	0.0474966					0.0074231	0.0158737					0.00990832	0.0297962					0.0428741	0.0493597					0.019291	0.0312123
0.0188505	0.0264737					0.0475765	0.0156805					0.0351068	0.0411815					0.0136415	0.0378234					0.0299643	0.031055					0.0378416	0.0203685
0.0167951	0.0174054					0.0113212	0.0125689					0.00933212	0.00468551					0.0465266	0.0218291					0.0128713	0.0209004					0.0119824	0.0152127
0.0126382	0.0213844					0.0295946	0.0228378					0.0395223	0.00912795					0.0169728	0.00886441					0.017493	0.00656894					0.00889606	0.0234101
0.00522009	0.00811094					0.00327652	0.00736205					0.0119287	0.0102186					0.00683504	0.0248711					0.0148872	0.0223917					0.0059602	0.00943399
0.0334596	0.0064627					0.0443909	0.0211226					0.00871768	0.0142133					0.00941281	0.0248951					0.0320625	0.0120527					0.0336951	0.0203494
0.0137008	0.0370621					0.0532391	0.0211421					0.0386944	0.0184002					0.0240279	0.0194233					0.0485482	0.0309004					0.023858	0.00938418
0.0126105	0.0346737					0.00980704	0.0257184					0.0423534	0.00783067					0.0204834	0.0358104					0.024964	0.0263603					0.00771513	0.0305902
0.012938	0.0259682					0.081336	0.0119444					0.0548869	0.0582555					0.0711227	0.0173413					0.00948201	0.0285433					0.0148159	0.0269503
0.0182504	0.0194779					0.0191546	0.0427689					0.0100021	0.0120606					0.033985	0.0146742					0.0143875	0.0048199					0.0320332	0.0341453
0.0391485	0.0249249					0.00434897	0.0161773					0.0185935	0.0203012					0.0354575	0.0135407					0.0248424	0.0116103					0.00968975	0.0299546
0.0191877	0.0156423					0.0504184	0.0213126					0.0305738	0.00830248					0.0332915	0.00920722					0.024571	0.0346069					0.024471	0.0259922
0.0240129	0.021988					0.0120456	0.0189612					0.0206688	0.0283078					0.0438867	0.00354311					0.00829692	0.0239917					0.0141408	0.0094216
0.0157533	0.0429741					0.0234517	0.0174719					0.0178748	0.00833411					0.0251404	0.0166592					0.00641394	0.00527301					0.0309886	0.0312002
0.0130209	0.00933676					0.0122309	0.0137936					0.0166436	0.0169531					0.021626	0.0160031					0.0250316	0.0172321					0.0371784	0.0128576
0.0246922	0.0282162					0.0146302	0.0055846					0.0115363	0.0280742					0.022453	0.0147179					0.0192573	0.0171866					0.0163768	0.0161975
0.0292364	0.0223731					0.022938	0.00673445					0.0117201	0.0216533					0.0318031	0.0101893					0.0022709	0.0105776					0.014124	0.012192
0.0104971	0.0129733					0.0176711	0.0158478					0.0149242	0.00485718					0.00459945	0.0193854					0.00825509	0.0129903					0.00913274	0.00488021
0.0102429	0.00791163					0.0234044	0.0140357					0.00834848	0.00821062					0.0164782	0.0125987					0.00860804	0.0169725					0.00917076	0.0136941
0.0117114	0.0120301					0.0149198	0.0194013					0.0296252	0.00545359					0.0107017	0.0235788					0.0231344	0.00501444					0.00906016	0.0161444
0.0191797	0.0166383					0.0163381	0.0130161					0.0164948	0.00718463					0.0157347	0.00406344					0.024686	0.0169246					0.0278148	0.0234807
0.0473672	0.0300804					0.0205196	0.0216105					0.0335567	0.0349019					0.0360171	0.00659022					0.0238006	0.0388785					0.0273421	0.0556187
0.0207943	0.0212944					0.0377667	0.0487944					0.0353287	0.00436288					0.0287087	0.045018					0.0452891	0.0173021					0.0122462	0.0293049
0.00470777	0.0228108					0.024003	0.022876					0.0239371	0.00981777					0.0107794	0.0193254					0.0458937	0.0107608					0.0177726	0.00992829
0.000565896	0.0202389					0.0220787	0.0255784					0.0206225	0.0255073					0.0149634	0.00798577					0.0138371	0.0154894					0.0244332	0.00720288
0.0157935	0.0236651					0.0259558	0.0132677					0.0446269	0.0132118					0.00568309	0.0235338					0.0331383	0.0271813					0.022252	0.0176336
0.00790151	0.0304614					0.00939053	0.0277821					0.0310967	0.0121333					0.015166	0.0160788					0.0294825	0.014396					0.0195084	0.00626024
0.0107818	0.0078113					0.00948599	0.0158904					0.0204306	0.0129703					0.0109027	0.00646744					0.0128314	0.00988544					0.0306003	0.0175812
0.0177797	0.0332724					0.00816638	0.0254225					0.0182313	0.00884102					0.0132305	0.00951931					0.0306452	0.0190154					0.0260125	0.0127079
0.023598	0.0060209					0.00849215	0.017995					0.0501797	0.0193451					0.02408	0.0162437					0.0247199	0.00999578					0.0181428	0.0252973
0.0133317	0.0190628					0.0362648	0.0404877					0.0402628	0.0159647					0.0108401	0.00995473					0.027899	0.0129997					0.0188968	0.0165229
0.009022	0.0152864					0.0340976	0.00480443					0.0298602	0.0175623					0.00494113	0.0199171					0.0391652	0.0255049					0.0125473	0.00891247
0.00465855	0.00521762					0.00938336	0.00436951					0.00973754	0.00818365					0.0169725	0.00655894					0.00922463	0.0101408					0.0104364	0.00931846
0.00758194	0.0127427					0.0275581	0.00471989					0.041636	0.0101625					0.0173263	0.00393324					0.0123385	0.0049538					0.0189035	0.0141207
0.00692378	0.0106557					0.0201928	0.00456338					0.0120867	0.00452481					0.023661	0.0224957					0.0131667	0.0127105					0.0344549	0.0151473
0.0144689	0.0261109					0.0405498	0.0183391					0.0210615	0.0127826					0.0343402	0.0325394					0.00446226	0.0245321					0.0179883	0.017857
0.022233	0.0240662					0.0175275	0.0434375					0.0490526	0.0103938					0.0137189	0.0449566					0.0245002	0.0224091					0.03479	0.0384883
0.0139218	0.0124774					0.0471275	0.019238					0.039774	0.00653553					0.0196077	0.00760692					0.047656	0.0238635					0.0197691	0.0189635
0.0126811	0.0326401					0.0264283	0.0237778					0.0474075	0.00301556					0.00508596	0.0080019					0.0223926	0.0168198					0.00978184	0.00449674
0.0039948	0.00467682					0.0147168	0.00525893					0.021876	0.0170852					0.0155341	0.0205832					0.0106951	0.0186112					0.0111555	0.0162956
0.0085543	0.0248937					0.0247054	0.0152772					0.0443192	0.0128943					0.0039222	0.0214389					0.0187541	0.0214151					0.0106184	0.00385354
0.00964399	0.00659797					0.0283278	0.0165126					0.00611545	0.025123					0.00949286	0.00541302					0.022582	0.0153656					0.0108446	0.0273396
0.0397529	0.00684491					0.0476949	0.00687453					0.0181156	0.033299					0.040581	0.0184894					0.010388	0.00562658					0.0315971	0.020191
0.0267225	0.0118949					0.0141748	0.0166753					0.00892105	0.0108179					0.00538991	0.0195609					0.0131742	0.0100814					0.0300104	0.0251501
0.0228191	0.00513201					0.0165067	0.0178429					0.00836668	0.0341857					0.0526631	0.024958					0.0143235	0.0169145					0.0230257	0.00963793
0.0359932	0.0245237					0.0103122	0.00230068					0.0195908	0.0198012					0.0363682	0.0336059					0.00294655	0.0151693					0.0347669	0.01924
0.0115581	0.0258653					0.00271477	0.0287294					0.0257675	0.0104689					0.0132542	0.00623457					0.0082805	0.00725353					0.0442134	0.0325187
0.0400125	0.0203134					0.0192294	0.0296897					0.00798161	0.0298062					0.0441967	0.0123903					0.0318793	0.0227194					0.0329205	0.00527393
0.0345283	0.031972					0.0411721	0.012286					0.0115355	0.0246185					0.0157718	0.00404311					0.0124889	0.012807					0.0255178	0.0391482
0.0117039	0.0363419					0.0260544	0.0259835					0.0253105	0.01291					0.0401086	0.01233					0.0119551	0.0165013					0.0369281	0.0377943
0.0170534	0.00389676					0.0267175	0.0150143					0.0140151	0.0293447					0.0234338	0.000643306					0.014149	0.0358347					0.0251135	0.0369828
0.0234391	0.0369043					0.026063	0.0311149					0.00763578	0.014693					0.00727602	0.0248026					0.0285175	0.0209696					0.0294476	0.0255927
0.0127587	0.00871132					0.00798361	0.0192554					0.00771635	0.0166772					0.0137844	0.00542308					0.023184	0.00303379					0.020701	0.0272269
0.00237967	0.0151355					0.0176062	0.0142004					0.035364	0.0140403					0.00989819	0.00684785					0.0469776	0.034245					0.00417163	0.00926987
0.0185488	0.0243717					0.015812	0.0247982					0.0202629	0.00754136					0.0298958	0.00453783					0.0183004	0.00932593					0.0209172	0.00832911
0.0107919	0.0100231					0.0214407	0.0248513					0.0229505	0.027226					0.00666297	0.0140779					0.02939	0.017623					0.0188587	0.0150595
0.0141632	0.00797794					0.0282915	0.0172459					0.00807914	0.0197557					0.00877201	0.00910531					0.0191994	0.0232655					0.0366898	0.0176666
0.00875979	0.00367159					0.0106892	0.0334895					0.0233632	0.0118231					0.0307912	0.0211674					0.00306491	0.00553998					0.0119979	0.0271914
0.0239948	0.0241671					0.00627206	0.0221543					0.0146768	0.0184831					0.0452215	0.00399867					0.0214878	0.0213811					0.0210476	0.0130551
0.0100295	0.00755253					0.0183356	0.0241205					0.0151849	0.0209658					0.0264337	0.0249172					0.0401023	0.020644					0.0106241	0.0172213
0.0435128	0.00387154					0.0149505	0.0197298					0.0289378	0.0178594					0.00903069	0.021091					0.00806248	0.0323525					0.00845746	0.00866417
0.0359244	0.00854894					0.0113508	0.00296689					0.00723816	0.0112632					0.0114919	0.00854149					0.0123291	0.0120001					0.0272883	0.00310542
0.148935	0.00656238					0.0274191	0.0121506					0.0187123	0.0243161					0.0637024	0.0150033					0.0127328	0.0157531					0.0945906	0.0165635
0.0250426	0.0176133					0.0278697	0.00950253					0.00808119	0.0109571					0.0374211	0.00970041					0.0275087	0.0147642					0.0195419	0.00784473
0.0173485	0.0158685					0.0183491	0.0143978					0.00231183	0.0142616					0.014416	0.00949156					0.0169043	0.00982731					0.00567978	0.00627265
0.0173538	0.00878079					0.0153991	0.0131526					0.0169793	0.0196119					0.0255334	0.0210367					0.0408054	0.0150149					0.0170345	0.00412849
0.142882	0.0268162					0.0478375	0.0132687					0.0490392	0.0490354					0.0664354	0.0247342					0.00851417	0.00256578					0.0753847	0.0136019
0.0269048	0.0170154					0.010387	0.0249241					0.0172443	0.0169586					0.0101672	0.00950612					0.0193103	0.0210913					0.0241419	0.0225467
0.0250872	0.0293217					0.00418167	0.0207736					0.0129622	0.0181051					0.0224422	0.00862933					0.010766	0.00266809					0.0319575	0.0141232
0.00445858	0.0287298					0.0230534	0.014238					0.0218772	0.015052					0.0160888	0.0260077					0.0132194	0.0430576					0.0111541	0.00984725
0.0117815	0.0263887					0.0145464	0.0293589					0.0158878	0.00568152					0.0208603	0.0119731					0.0333965	0.00534487					0.0140252	0.00917837
0.0120856	0.00509698					0.0122538	0.00831896					0.0149465	0.0078707					0.00339797	0.00304271					0.0178026	0.0138874					0.0252454	0.0200816
0.0151083	0.0189962					0.0419813	0.00470343					0.0515126	0.0231311					0.0220776	0.0172545					0.0163158	0.0278998					0.0158026	0.01532
0.00694359	0.00410707					0.00310577	0.00805658					0.0187426	0.0121672					0.0129915	0.00980644					0.00418578	0.0156057					0.00537556	0.0128777
0.0227651	0.0251237					0.0519408	0.00362815					0.0486811	0.0243679					0.0119967	0.0104958					0.00303127	0.0263298					0.0202873	0.0200402
0.00985827	0.0041971					0.0138521	0.0159799					0.0342943	0.0163712					0.00185372	0.00732689					0.00584656	0.0230544					0.0185266	0.0206443
0.0128588	0.0106471					0.0230575	0.0205532					0.0295573	0.00701549					0.0205202	0.011723					0.0116825	0.0179065					0.0214935	0.0345817
0.0192217	0.006584					0.00756749	0.0165323					0.0321791	0.0244015					0.0188851	0.0151728					0.0156851	0.00974494					0.00858684	0.0147352
0.0112367	0.013013					0.0146894	0.0137967					0.0179997	0.0188184					0.00911653	0.0264763					0.0173112	0.00716028					0.0160072	0.0138185
0.0128713	0.00862958					0.0131859	0.0026401					0.0197826	0.0103247					0.00987369	0.00856685					0.0190372	0.0135985					0.0148906	0.0122072
0.0148435	0.0104153					0.00952752	0.00240433					0.0316	0.0094947					0.01589	0.0232858					0.00385513	0.0273811					0.00969802	0.0133449
0.0289453	0.0168805					0.0237898	0.0118423					0.0342961	0.00841129					0.0276425	0.0189224					0.0053368	0.0297799					0.00623299	0.0250683
0.0129764	0.0104985					0.0139008	0.013087					0.027485	0.011317					0.0282965	0.0273077					0.0242572	0.0148415					0.015022	0.0161501
0.0295457	0.0149945					0.0318495	0.0130355					0.00745184	0.00808255					0.0196477	0.0086859					0.00367585	0.0189699					0.0167944	0.0205912
0.0207658	0.0225998					0.0144971	0.00903161					0.029473	0.0250936					0.00313883	0.0175624					0.0191753	0.0240678					0.0228785	0.0157657
0.0208351	0.0158833					0.014123	0.0112196					0.00689339	0.00559712					0.0177246	0.0256205					0.020648	0.0247314					0.0206867	0.00506346
0.0146457	0.0159713					0.0162858	0.00999097					0.0134978	0.0115558					0.00836624	0.0134217					0.00390573	0.020769					0.01781	0.00927711
0.00899207	0.00476771					0.00901962	0.0112661					0.0276411	0.0128095					0.0115355	0.0178611					0.00604597	0.0111631					0.00539681	0.0107052
0.0989648	0.0134542					0.0268494	0.0164962					0.0257358	0.00504739					0.0679912	0.00417919					0.0573972	0.00179266					0.034138	0.0128932
0.0418335	0.0317198					0.0107183	0.0132125					0.0400471	0.0296834					0.00674068	0.0171211					0.00577587	0.0366126					0.0170645	0.00644575
0.0325233	0.0172371					0.0148153	0.00455264					0.0182312	0.010633					0.0108192	0.023251					0.00279847	0.0277968					0.0153968	0.0242588
0.0430444	0.024493					0.0167589	0.0196525					0.0388667	0.0319462					0.037409	0.02137					0.0203309	0.0239062					0.00789183	0.000825861
0.104917	0.0240871					0.0294555	0.0139921					0.0378634	0.0161436					0.0374702	0.0120182					0.0567828	0.010259					0.033404	0.0121468
0.0165284	0.0169949					0.0131327	0.00624288					0.027289	0.0169933					0.0179985	0.0164292					0.0111636	0.0304244					0.027698	0.0145052
0.0303807	0.0236361					0.0375362	0.0161618					0.0459412	0.0241814					0.0217883	0.019139					0.0190271	0.0193433					0.030759	0.0237119
0.00984703	0.0192379					0.0367296	0.00713275					0.0331956	0.0145204					0.0185367	0.0137171					0.00915515	0.0112608					0.0264866	0.0248625
0.00538372	0.0212231					0.0110551	0.00315884					0.02357	0.0131598					0.00563757	0.0157547					0.00385701	0.0339766					0.0040601	0.00721038
0.0145448	0.0159322					0.0169658	0.00657583					0.0271769	0.0188237					0.0331863	0.0126044					0.00396339	0.0147077					0.0113156	0.0158727
0.0200347	0.0452845					0.0193235	0.0111413					0.011402	0.012446					0.00858754	0.0277939					0.0283478	0.0197542					0.00913791	0.00508203
0.0450779	0.0341972					0.0364448	0.0206764					0.0493092	0.0169641					0.0188276	0.01364					0.0395072	0.0232405					0.0232943	0.013363
0.0576304	0.0332252					0.0276153	0.015617					0.0262802	0.0229291					0.00528206	0.0128022					0.0120124	0.0428368					0.0299279	0.0259967
0.016286	0.0130706					0.0181448	0.00851121					0.00656383	0.0100736					0.00904577	0.0076733					0.0155945	0.00299233					0.0229444	0.0100426
0.0313443	0.0145646					0.031664	0.00762465					0.01104	0.0340275					0.0160186	0.0223316					0.00692787	0.00482685					0.0110147	0.0253055
0.032469	0.00118036					0.0231012	0.0268252					0.044139	0.0149964					0.0166878	0.0206968					0.00869216	0.00861713					0.0269227	0.0111333
0.0134095	0.013725					0.0138299	0.0224891					0.0042719	0.0306149					0.0239559	0.025808					0.0118209	0.00579792					0.0102966	0.0226009
0.0164666	0.0125541					0.011272	0.0101129					0.0128335	0.0199563					0.0129802	0.0139774					0.0154928	0.0069226					0.00184909	0.0275797
0.0152627	0.0189168					0.0125216	0.00851398					0.00556663	0.0116143					0.00247642	0.00883033					0.0147052	0.0185427					0.0151176	0.0110714
0.0856096	0.00690995					0.00933915	0.0153629					0.0128967	0.0392174					0.0499762	0.00739098					0.0304712	0.0293679					0.0347775	0.0404789
0.0842724	0.0218275					0.0484622	0.0134213					0.0283853	0.0109877					0.019622	0.00964201					0.0217051	0.025287					0.0416449	0.00237844
0.105505	0.0340224					0.0384288	0.0416659					0.00204007	0.019845					0.0284671	0.0158929					0.00836585	0.0585437					0.0640607	0.0307234
0.023633	0.021831					0.0147293	0.0152456					0.0175834	0.0137361					0.0203585	0.0133491					0.0124859	0.0150184					0.0177995	0.0207414
0.0399195	0.0188888					0.0346375	0.0221111					0.0234542	0.0198768					0.0161808	0.00917829					0.00611133	0.0101615					0.00951152	0.0166146
0.0282489	0.0133787					0.0135096	0.0247041					0.0190962	0.0248239					0.0157105	0.0200898					0.0200755	0.0096102					0.0259293	0.00612502
0.0151113	0.0253783					0.0148073	0.0162199					0.031338	0.0157855					0.00591192	0.0150483					0.000518036	0.0106569					0.00157415	0.0183436
0.0137297	0.00946013					0.0155067	0.00772004					0.0155891	0.0125636					0.0116941	0.0172365					0.0136869	0.0140734					0.0162391	0.0238571
0.0177245	0.0237847					0.0199221	0.0244995					0.01905	0.0073729					0.0211584	0.0100276					0.0116757	0.00522787					0.0144571	0.0071461
0.0236891	0.0122905					0.0137911	0.00971726					0.0184246	0.0185019					0.0189293	0.00360515					0.00896061	0.0242184					0.00347977	0.0131107
0.016141	0.0183451					0.0266169	0.00317218					0.0383643	0.0162715					0.00573311	0.0122617					0.0141644	0.0197177					0.0183273	0.0155669
0.0132656	0.0102176					0.0150046	0.0155917					0.00298769	0.00403711					0.00363989	0.00234219					0.0050071	0.0149981					0.00795373	0.0187916
0.033959	0.0285712					0.00607961	0.0178601					0.0170455	0.0132818					0.0220729	0.030698					0.0148088	0.0118023					0.0354889	0.00936511
0.0161441	0.0226553					0.0233603	0.0245031					0.0174613	0.00665789					0.0157238	0.0139194					0.0216487	0.00913979					0.018464	0.0102433
0.0479315	0.0262233					0.019179	0.0165171					0.0476531	0.0181643					0.0229781	0.00643562					0.00395896	0.0468652					0.0309139	0.0225103
0.087158	0.00886481					0.00533672	0.0245727					0.0246389	0.00422212					0.0208687	0.0171777					0.0285779	0.0157814					0.0508371	0.0180339
0.0389345	0.0247532					0.0299974	0.00832032					0.0287149	0.0190993					0.0222845	0.0177917					0.026868	0.0211792					0.0191475	0.0156226
0.0244574	0.0302779					0.0202039	0.0125555					0.00563208	0.022758					0.028747	0.0118601					0.0189523	0.0489853					0.0616689	0.0172243
0.0614973	0.0219817					0.0133033	0.00467602					0.0159468	0.0181881					0.0138646	0.00533653					0.039625	0.0228722					0.0185864	0.0197492
0.0155739	0.0190212					0.0175718	0.0178972					0.0155002	0.0155086					0.0202218	0.0154409					0.0135051	0.0250432					0.01148	0.0260512
0.0408805	0.00419348					0.0159842	0.00848068					0.0135093	0.0118329					0.0185575	0.0131672					0.019952	0.0105457					0.0434534	0.0186298
0.0190625	0.0288275					0.032329	0.0105612					0.0221237	0.0138397					0.0422581	0.0200915					0.019665	0.0173971					0.0628463	0.0140538
0.0243948	0.00997771					0.0164833	0.0138049					0.0163934	0.012691					0.011294	0.00497609					0.0363025	0.023042					0.0112329	0.0170859
0.0237085	0.0152247					0.0242405	0.00706353					0.0122868	0.00688283					0.0131306	0.0224645					0.0142913	0.00779608					0.0413254	0.00980624
0.0232399	0.0184751					0.0351319	0.0394					0.0225785	0.0105482					0.0433843	0.00667805					0.0160267	0.023394					0.0639595	0.0162676
0.0120171	0.012642					0.0219687	0.0168886					0.0216626	0.016784					0.0111408	0.00460544					0.0319314	0.0315418					0.00685573	0.0131089
0.0167317	0.0136156					0.0223483	0.00980984					0.0200558	0.00368977					0.0276545	0.0186491					0.0137105	0.0294836					0.0351252	0.00388803
0.0147205	0.0107888					0.0115747	0.0113689					0.00717918	0.0231248					0.0300618	0.0219443					0.0130099	0.0228263					0.0160106	0.0134642
0.019603	0.0129446					0.00978014	0.0160836					0.0161598	0.0135029					0.00774528	0.00077534					0.0105307	0.00379659					0.0139819	0.00272702
0.0644727	0.0133209					0.0456909	0.00337456					0.0269926	0.00958172					0.0334878	0.0153698					0.00733095	0.0104975					0.0959087	0.0026881
0.0100559	0.0116586					0.0268288	0.0066629					0.015208	0.0124685					0.0212079	0.0135124					0.0239192	0.0069804					0.0108896	0.00521856
0.0147883	0.00195215					0.0171262	0.0274133					0.0340794	0.0183076					0.032099	0.016731					0.0148291	0.00164288					0.0425372	0.00257455
0.0236826	0.0246981					0.0213013	0.0280673					0.0261615	0.00619518					0.000958908	0.00179316					0.0123228	0.0149798					0.0575742	0.00443557
0.0207542	0.014423					0.0118672	0.0143229					0.0146696	0.0071567					0.0408719	0.0214239					0.024096	0.0150779					0.0132115	0.0219836
0.0208832	0.00679735					0.0112829	0.0137782					0.0370871	0.00719384					0.0378993	0.0333913					0.0199708	0.0268504					0.0163283	0.0108503
0.0170994	0.020259					0.00813509	0.0178234					0.0161169	0.00734316					0.017985	0.0141574					0.0164067	0.0220296					0.0153064	0.0245393
0.010049	0.00661099					0.00487488	0.00695555					0.0164853	0.0156107					0.0169276	0.0174069					0.0361099	0.00750342					0.0387695	0.0140274
0.0370995	0.0200708					0.0379017	0.0100069					0.0299827	0.010887					0.0454097	0.0178915					0.0383855	0.0189594					0.0743102	0.0140389
0.0193978	0.0371476					0.0133979	0.018665					0.0356405	0.0147772					0.0363276	0.0160322					0.0117414	0.0169978					0.0336701	0.0228866
0.0108377	0.0050112					0.01428	0.0120401					0.0131785	0.00966434					0.0246039	0.0277848					0.0228127	0.0107758					0.00480752	0.0088375
0.0469518	0.0213517					0.010862	0.0232986					0.0215652	0.00326253					0.0296498	0.0050502					0.0118567	0.0075783					0.0251839	0.0301228
0.038518	0.0347835					0.0458884	0.0114176					0.0376369	0.0132534					0.039169	0.0171913					0.00459745	0.0246858					0.0727759	0.00659779
0.0117869	0.0107849					0.013977	0.0071678					0.0173109	0.0138297					0.0196766	0.0162902					0.00434813	0.00593323					0.0104388	0.0101358
0.0379382	0.019468					0.0142177	0.00624581					0.0213094	0.00518973					0.00723067	0.0152115					0.0237473	0.0124886					0.0276773	0.00654178
0.0159176	0.0296428					0.0227538	0.0105823					0.0229495	0.0074881					0.0312042	0.00885206					0.0124433	0.0106608					0.0597007	0.0217608
0.0163554	0.0094652					0.00809439	0.00518313					0.0219241	0.0135566					0.0291991	0.00638353					0.0493543	0.00654076					0.036776	0.0148803
0.0373614	0.0145412					0.023207	0.00537775					0.00392784	0.015226					0.0154269	0.00976866					0.0235586	0.0114025					0.0521017	0.014161
0.0292458	0.00516461					0.0446451	0.0103301					0.0305355	0.0196837					0.0345231	0.0263022					0.0165829	0.0013031					0.0630476	0.0206951
0.0449971	0.0168811					0.0241954	0.0264163					0.0627601	0.00283663					0.0342808	0.0282005					0.0638003	0.0224194					0.0601995	0.0156856
0.0703365	0.0198536					0.0312605	0.0108768					0.0616545	0.0370805					0.0283741	0.00989597					0.0733689	0.0203673					0.0573547	0.0273719
0.0567693	0.0324944					0.0405397	0.0271596					0.0113808	0.0152897					0.018882	0.0162729					0.00164069	0.0389264					0.0296514	0.0345259
0.0212146	0.0274693					0.006665	0.0296278					0.0119499	0.0132966					0.0269966	0.00128827					0.0204327	0.0190889					0.0314427	0.00875872
0.0449084	0.0235794					0.0231434	0.000431812					0.057447	0.0331136					0.0204975	0.0335053					0.0597182	0.031838					0.0424945	0.0258668
0.0261563	0.0342836					0.0301111	0.0224058					0.00679687	0.0246547					0.00813012	0.022373					0.0272518	0.0270699					0.0174748	0.0314756
0.015989	0.0247798					0.0109586	0.0174848					0.00200961	0.00657245					0.0392636	0.0290813					0.0282568	0.00552465					0.0484603	0.0130112
0.0285694	0.0132303					0.00966939	0.0102413					0.00503363	0.0106283					0.0285129	0.00848881					0.0630953	0.00769041					0.0191983	0.0117099
0.0170667	0.0468904					0.0303884	0.0225236					0.00518446	0.0139712					0.0330428	0.00749858					0.0600929	0.00803777					0.022697	0.0104525
0.0103633	0.0322471					0.065005	0.0155919					0.0593632	0.0188939					0.00849135	0.0222238					0.0586231	0.0122986					0.0286913	0.0160111
0.0464787	0.0236231					0.0571608	0.0293191					0.08254	0.0161951					0.0269506	0.00799612					0.0777583	0.0267037					0.0347724	0.023313
0.0245004	0.0545899					0.078821	0.0430043					0.0633044	0.0161148					0.0304149	0.0103553					0.0631714	0.0146954					0.0405066	0.040397
0.0546333	0.0177772					0.0610647	0.0182391					0.0708287	0.0190155					0.0185743	0.0162699					0.0517601	0.0267454					0.02488	0.00683138
0.0255171	0.0132325					0.0264797	0.00993339					0.0357553	0.00905533					0.00684183	0.0112811					0.0319906	0.00940307					0.0169131	0.00568071
0.0523111	0.00314138					0.0327385	0.00213979					0.040607	0.00100034					0.0327661	0.0162908					0.0457159	0.00849161					0.0409531	0.0152227
0.0248316	0.0571402					0.0425064	0.0118948					0.0762091	0.0265942					0.0353464	0.0402429					0.0754416	0.0156403					0.0353067	0.0126053
0.0403352	0.0162843					0.0219176	0.0108399					0.0346256	0.0375108					0.0322392	0.0111524					0.0438318	0.0271035					0.0389022	0.0516154
0.00720918	0.00202938					0.039523	0.028616					0.0709068	0.00770806					0.0338098	0.0155329					0.0420311	0.00510009					0.0543035	0.0171106
0.00768483	0.0222035					0.0191911	0.0248041					0.0483555	0.00646646					0.0150536	0.00841612					0.0652348	0.00730327					0.0240127	0.0153864
0.00555749	0.0173149					0.0167607	0.0218603					0.013104	0.0213996					0.0210373	0.0124601					0.0328851	0.00790109					0.0140439	0.0205961
0.0167114	0.0141569					0.0209568	0.0161664					0.0470503	0.0155436					0.0150331	0.0213516					0.0323997	0.015557					0.0147758	0.00494517
0.0179914	0.038228					0.0641292	0.0401956					0.063934	0.00717675					0.0358906	0.0255795					0.0729774	0.0295733					0.0507089	0.0323018
0.0364377	0.0450785					0.0547456	0.0119114					0.0525555	0.017913					0.0209224	0.00955258					0.0541807	0.0160825					0.0589394	0.0400334
0.0189532	0.011591					0.0361087	0.00920237					0.040995	0.0209444					0.0211671	0.0385199					0.0189274	0.0268092					0.0212008	0.0196443
0.0271026	0.0212968					0.00309202	0.00966575					0.00660127	0.0240964					0.0201692	0.0305982					0.0214152	0.00559116					0.036785	0.0148618
0.00276565	0.00923885					0.0361252	0.0227313					0.0463727	0.017226					0.0189012	0.0225131					0.0119151	0.0256871					0.00431158	0.015638
0.0308896	0.0148876					0.0214943	0.00830171					0.0305985	0.0232636					0.0300202	0.0105306					0.0312181	0.00522697					0.00383044	0.0260644
0.0220028	0.019874					0.0162137	0.012959					0.0115911	0.0290513					0.0291586	0.043272					0.00270218	0.0141149					0.0351882	0.0243757
0.0177279	0.0114902					0.0345452	0.0107351					0.0467148	0.0118118					0.0247121	0.011458					0.0226524	0.0237646					0.00291468	0.0160416
0.0182802	0.0134213					0.00293628	0.0181734					0.00880041	0.00183587					0.0330954	0.017782					0.0118477	0.00108573					0.00837606	0.0168229
0.0274068	0.00271279					0.0105085	0.00982229					0.0291059	0.00248736					0.011733	0.00848969					0.0218782	0.00292443					0.0208161	0.00614565
0.0157003	0.0267619					0.0146606	0.0371779					0.00978877	0.0133913					0.0156194	0.00537127					0.0092111	0.00878863					0.0030088	0.0280979
0.00154321	0.00234719					0.0313095	0.00215949					0.0407495	0.00813393					0.0112424	0.00606141					0.031664	0.0175596					0.0315896	0.00914146
0.00972416	0.0268946					0.00350471	0.0133768					0.0273961	0.00506471					0.0350704	0.00956244					0.015391	0.00726679					0.0142969	0.0230344
0.0201776	0.0128963					0.0435161	0.00207711					0.0315089	0.00903265					0.0202028	0.00147559					0.0287021	0.00851222					0.0160717	0.00411965
0.0127459	0.00841066					0.0185651	0.0259066					0.0360229	0.0102453					0.0227649	0.0216433					0.0295797	0.0287592					0.0285409	0.0182556
0.0102262	0.0184804					0.0370254	0.0099541					0.0482354	0.00796824					0.0305689	0.00919401					0.0319379	0.0106562					0.0444533	0.00425507
0.0282678	0.0196116					0.0224097	0.0058837					0.0264953	0.0273387					0.0264621	0.00327948					0.0184625	0.0141647					0.00366802	0.0223465
0.0108648	0.00688897					0.0226092	0.00882115					0.0157614	0.00202207					0.0172729	0.0116872					0.0224929	0.010024					0.00988005	0.00131488
0.0291746	0.0225583					0.0241444	0.0121496					0.026171	0.00881949					0.0333278	0.00844555					0.0264432	0.0121122					0.0202949	0.0149754
0.0364666	0.0223034					0.0217027	0.0100077					0.0214492	0.0253923					0.0275459	0.0117906					0.0435927	0.00382909					0.0281081	0.0070804
0.00928548	0.00753776					0.00560042	0.00801518					0.0303684	0.00966955					0.0182444	0.0141897					0.0229641	0.0109439					0.00812986	0.0172862
0.00726863	0.0110343					0.0302907	0.0104075					0.0239351	0.0301443					0.0278899	0.0087511					0.0104363	0.0146206					0.0259507	0.00513059
0.00785953	0.011135					0.0111457	0.00810194					0.0246186	0.00558889					0.0312724	0.00502563					0.0142179	0.0124338					0.0117486	0.00751043
0.0206062	0.0105074					0.00810399	0.0137533					0.010767	0.0140861					0.0153111	0.0188897					0.0315469	0.00843772					0.0075956	0.0113589
0.00644957	0.0245182					0.0201126	0.00567536					0.0195551	0.0149086					0.0208729	0.00673605					0.017884	0.0029326					0.020628	0.0119754
0.0235213	0.0229307					0.0345403	0.00814843					0.018057	0.00551424					0.0270195	0.00353317					0.0406985	0.00921763					0.0227614	0.0157956
0.0231239	0.0101847					0.056443	0.00416748					0.0397911	0.00629991					0.0363533	0.0166741					0.0233047	0.0257777					0.0212127	0.0250412
0.0160311	0.00381978					0.047859	0.0304742					0.0314384	0.0163507					0.0332927	0.0396937					0.0343757	0.036627					0.0158412	0.0289136
0.00689163	0.021226					0.0268307	0.00738688					0.0177763	0.0136786					0.0274957	0.00726219					0.026986	0.0199228					0.0413505	0.00838308
0.0261474	0.0345025					0.025744	0.0375819					0.0331927	0.041019					0.0127613	0.0166259					0.0363634	0.00587983					0.0181326	0.0187277
Table Analyzed	LFP 10-11					Table Analyzed	LFP 10-11					Table Analyzed	LFP 10-11					Table Analyzed	LFP 10-11					Table Analyzed	LFP 10-11					Table Analyzed	LFP 10-11
Column D	8Hz (Shuffle)					Column D	12Hz (Shuffle)					Column D	16Hz (Shuffle)					Column D	20Hz (Shuffle)					Column D	15Hz (Shuffle)					Column D	10Hz (Shuffle)
vs.	vs.					vs.	vs.					vs.	vs.					vs.	vs.					vs.	vs.					vs.	vs.
Column C	8Hz					Column C	12Hz					Column C	16Hz					Column C	20Hz					Column C	15Hz					Column C	10Hz
Wilcoxon matched-pairs signed rank test						Wilcoxon matched-pairs signed rank test						Wilcoxon matched-pairs signed rank test						Wilcoxon matched-pairs signed rank test						Wilcoxon matched-pairs signed rank test						Wilcoxon matched-pairs signed rank test
P value	0.0011					P value	<0.0001					P value	<0.0001					P value	<0.0001					P value	0.0011					P value	<0.0001
Exact or approximate P value?	Approximate					Exact or approximate P value?	Approximate					Exact or approximate P value?	Approximate					Exact or approximate P value?	Approximate					Exact or approximate P value?	Approximate					Exact or approximate P value?	Approximate
P value summary	**					P value summary	****					P value summary	****					P value summary	****					P value summary	**					P value summary	****
Significantly different (P < 0.05)?	Yes					Significantly different (P < 0.05)?	Yes					Significantly different (P < 0.05)?	Yes					Significantly different (P < 0.05)?	Yes					Significantly different (P < 0.05)?	Yes					Significantly different (P < 0.05)?	Yes
One- or two-tailed P value?	Two-tailed					One- or two-tailed P value?	Two-tailed					One- or two-tailed P value?	Two-tailed					One- or two-tailed P value?	Two-tailed					One- or two-tailed P value?	Two-tailed					One- or two-tailed P value?	Two-tailed
Sum of positive, negative ranks	8886 , -14985					Sum of positive, negative ranks	6576 , -17295					Sum of positive, negative ranks	5304 , -18567					Sum of positive, negative ranks	6576 , -17295					Sum of positive, negative ranks	8889 , -14982					Sum of positive, negative ranks	7166 , -16705
Sum of signed ranks (W)	-6099					Sum of signed ranks (W)	-10719					Sum of signed ranks (W)	-13263					Sum of signed ranks (W)	-10719					Sum of signed ranks (W)	-6093					Sum of signed ranks (W)	-9539
Number of pairs	218					Number of pairs	218					Number of pairs	218					Number of pairs	218					Number of pairs	218					Number of pairs	218
Number of ties (ignored)	0					Number of ties (ignored)	0					Number of ties (ignored)	0					Number of ties (ignored)	0					Number of ties (ignored)	0					Number of ties (ignored)	0
Median of differences						Median of differences						Median of differences						Median of differences						Median of differences						Median of differences
Median	-0.003047					Median	-0.006006					Median	-0.00758					Median	-0.005184					Median	-0.002976					Median	-0.004511
How effective was the pairing?						How effective was the pairing?						How effective was the pairing?						How effective was the pairing?						How effective was the pairing?						How effective was the pairing?
rs (Spearman)	0.2334					rs (Spearman)	0.05602					rs (Spearman)	0.07222					rs (Spearman)	0.08354					rs (Spearman)	0.02853					rs (Spearman)	0.1099
P value (one tailed)	0.0003					P value (one tailed)	0.2053					P value (one tailed)	0.1442					P value (one tailed)	0.1096					P value (one tailed)	0.3377					P value (one tailed)	0.0528
P value summary	***					P value summary	ns					P value summary	ns					P value summary	ns					P value summary	ns					P value summary	ns
Was the pairing significantly effective?	Yes					Was the pairing significantly effective?	No					Was the pairing significantly effective?	No					Was the pairing significantly effective?	No					Was the pairing significantly effective?	No					Was the pairing significantly effective?	No

## Sheet: FigS10
	8Hz Polarity Index						12Hz Polarity Index						16Hz Polarity Index						20Hz Polarity Index						15Hz Polarity Index						10Hz Polarity Index
	DCN SU x Motion
	8 Hz						12 Hz						16 Hz						20 Hz						15 Hz						10 Hz
	Original	Shuffled					Original	Shuffled					Original	Shuffled					Original	Shuffled					Original	Shuffled					Original	Shuffled
unit 1	0.468278	0.00594867					0.225667	0.00276375					0.34917	0.01694					0.47829	0.00805118					0.12022	0.0128582					0.43887	0.0172659
unit 2	0.0948577	0.00430745					0.0527427	0.0284674					0.2226	0.0217211					0.270144	0.00826004					0.0577746	0.00769797					0.0751973	0.00899676
unit 3	0.370003	0.00719585					0.215777	0.0184341					0.37281	0.0130642					0.468913	0.0116869					0.114779	0.00228607					0.295057	0.00233877
unit 4	0.510251	0.00533172					0.252647	0.0037142					0.406852	0.00621568					0.514098	0.0160349					0.138962	0.0177708					0.46159	0.0202717
unit 5	0.292448	0.00814866					0.142551	0.00331276					0.24201	0.00417076					0.288263	0.00674016					0.0913296	0.0231419					0.30059	0.00426659
unit 6	0.245601	0.00662762					0.18274	0.0177103					0.302525	0.0183845					0.384799	0.00800103					0.0916075	0.028726					0.228756	0.010585
unit 7	0.434695	0.0101966					0.239653	0.00683745					0.369907	0.00785634					0.444278	0.0138535					0.0907303	0.0129662					0.376023	0.0121767
unit 8	0.538589	0.0161227					0.247536	0.0172156					0.43413	0.0040021					0.509561	0.0106002					0.156414	0.022164					0.466329	0.0152236
unit 9	0.174493	0.0318512					0.226708	0.0363366					0.273013	0.0169672					0.420591	0.03116					0.073687	0.0112462					0.241187	0.0246935
unit 10	0.266086	0.0317528					0.245373	0.0440785					0.267138	0.0457631					0.413049	0.0146971					0.0743277	0.049256					0.299767	0.0145237
unit 11	0.146253	0.008853					0.156123	0.0110289					0.141635	0.00363802					0.223772	0.0146503					0.137903	0.00629736					0.126655	0.00574852
unit 12	0.484844	0.00695455					0.445148	0.0115705					0.457715	0.0146249					0.579345	0.0191638					0.454751	0.011853					0.46988	0.00844035
unit 13	0.197284	0.0147886					0.184332	0.0110177					0.139324	0.0156167					0.174468	0.0135485					0.122622	0.00712115					0.142926	0.0203578
unit 14	0.189472	0.0223809					0.372689	0.0332769					0.3988	0.000435701					0.539603	0.0278951					0.251151	0.0143376					0.265218	0.0401275
unit 15	0.508537	0.0131458					0.522434	0.0139788					0.470287	0.0245204					0.613482	0.0128642					0.449648	0.0135086					0.457492	0.0137111
unit 16	0.232025	0.00615321					0.283866	0.00310287					0.249977	0.0174171					0.36985	0.0185023					0.283255	0.00990776					0.178365	0.010039
unit 17	0.443211	0.0176103					0.480167	0.0174192					0.410018	0.0164974					0.57344	0.0187972					0.437223	0.000255704					0.29983	0.00849656
unit 18	0.532791	0.0128565					0.569806	0.0214343					0.495335	0.0227531					0.652636	0.0138715					0.525434	0.0134331					0.480156	0.0101814
unit 19	0.417746	0.00296763					0.321771	0.00952336					0.352583	0.0192106					0.578685	0.0204062					0.47655	0.0392743					0.191672	0.0092923
unit 20	0.572261	0.00329532					0.600012	0.0169524					0.51476	0.0091903					0.686158	0.0375839					0.52253	0.0180218					0.51649	0.0131513
unit 21	0.480768	0.00690537					0.589009	0.00943578					0.420502	0.014602					0.610109	0.00326451					0.523464	0.0133538					0.450753	0.0168592
unit 22	0.112596	0.00351402					0.158914	0.0164518					0.10422	0.0196672					0.209349	0.00759022					0.213973	0.0203584					0.10253	0.0164383
unit 23	0.186567	0.003933					0.283947	0.0158477					0.248121	0.00844161					0.42929	0.00824964					0.341861	0.0137765					0.178256	0.00736916
unit 24	0.577282	0.0189193					0.725612	0.0114003					0.53139	0.0170788					0.773284	0.0166753					0.686123	0.0219254					0.543441	0.012754
unit 25	0.398846	0.00776809					0.53585	0.0222016					0.444242	0.011743					0.727574	0.0185496					0.636225	0.00956698					0.320164	0.0178765
unit 26	0.150533	0.00735068					0.476544	0.0163435					0.271043	0.0100838					0.476105	0.0164276					0.447207	0.0172142					0.335795	0.0186596
unit 27	0.385755	0.00120202					0.425363	0.0105367					0.358059	0.00159917					0.517105	0.00283466					0.483634	0.0108627					0.333274	0.0148971
unit 28	0.50498	0.0275701					0.714616	0.0119352					0.568389	0.00603394					0.736024	0.0148419					0.67153	0.0231706					0.55793	0.0421247
unit 29	0.144651	0.0316576					0.245972	0.0249698					0.411695	0.0200755					0.818365	0.0178299					0.653451	0.0761033					0.202149	0.0277159
unit 30	0.0897525	0.0183389					0.0869541	0.00771341					0.0790311	0.019452					0.153691	0.000949661					0.0459527	0.0132104					0.0818931	0.0108073
unit 31	0.415653	0.0207283					0.444033	0.00632167					0.383839	0.0106847					0.342881	0.0067101					0.271504	0.00718775					0.283726	0.00778024
unit 32	0.527344	0.017773					0.562282	0.0043582					0.351005	0.0166886					0.334003	0.0224827					0.3059	0.0103034					0.469319	0.0152946
unit 33	0.708016	0.0231435					0.632813	0.00875963					0.559666	0.00367646					0.416514	0.00529744					0.351195	0.0219313					0.651471	0.0130521
unit 34	0.567458	0.0192554					0.558251	0.00268061					0.430577	0.0087978					0.375501	0.0104134					0.326041	0.0149697					0.517442	0.00722972
unit 35	0.580316	0.0103788					0.546984	0.00992807					0.422771	0.000983685					0.324274	0.011451					0.284587	0.00574962					0.490144	0.00693373
unit 36	0.589762	0.0199527					0.506001	0.00406013					0.455021	0.00503854					0.401595	0.00184919					0.279258	0.0167756					0.399956	0.0160222
unit 37	0.342959	0.0260948					0.232589	0.00768778					0.146987	0.012683					0.101121	0.0081142					0.120673	0.0279145					0.229485	0.0110406
unit 38	0.165457	0.010635					0.150998	0.0125149					0.0504057	0.0107215					0.18761	0.00714446					0.0831026	0.0077118					0.136532	0.00189029
unit 39	0.447743	0.0103418					0.400971	0.0184092					0.119965	0.0134913					0.311619	0.0192101					0.161074	0.0047788					0.419246	0.0133724
unit 40	0.313816	0.013768					0.272985	0.0137545					0.0402055	0.0089729					0.257306	0.00219347					0.116429	0.0120398					0.342047	0.00624711
unit 41	0.222562	0.00974358					0.259471	0.00970653					0.129328	0.0125198					0.229596	0.0027688					0.165929	0.00793156					0.268997	0.00541998
unit 42	0.117886	0.0465826					0.0881405	0.0303018					0.121099	0.0320933					0.0557952	0.0324433					0.0719407	0.0499731					0.124728	0.0295996
unit 43	0.255544	0.0136796					0.21546	0.0257058					0.0351272	0.0115336					0.320968	0.0158515					0.150092	0.00592233					0.273123	0.0325646
unit 44	0.17317	0.0429726					0.381862	0.0115917					0.223717	0.00501612					0.259625	0.0342175					0.138385	0.0318673					0.277068	0.00750066
unit 45	0.504761	0.0306524					0.466178	0.0172721					0.179373	0.0162585					0.334697	0.0198331					0.128085	0.0117119					0.462214	0.0350932
unit 46	0.131512	0.0164152					0.0956389	0.0141383					0.149586	0.0202732					0.0516301	0.00957633					0.0659509	0.0180183					0.15961	0.014704
unit 47	0.694185	0.0105971					0.402073	0.0157737					0.587051	0.0112688					0.440329	0.0144351					0.352268	0.0163526					0.76722	0.0047673
unit 48	0.521796	0.00885155					0.247119	0.0306473					0.33505	0.0185355					0.307576	0.0160567					0.259289	0.00965503					0.564545	0.00741561
unit 49	0.657183	0.00715958					0.373548	0.0247186					0.569953	0.00190614					0.437891	0.00794661					0.318495	0.0117415					0.734912	0.0174528
unit 50	0.472724	0.0205413					0.243273	0.0311857					0.453943	0.0129653					0.462855	0.0064015					0.254894	0.0144576					0.495626	0.0319825
unit 51	0.511959	0.0180652					0.26206	0.0437347					0.389168	0.00546475					0.316263	0.0114613					0.248084	0.0352428					0.531277	0.00983333
unit 52	0.400957	0.0173129					0.27978	0.0170088					0.458915	0.0315062					0.421054	0.046314					0.314229	0.00346618					0.450382	0.0184743
unit 53	0.188373	0.0232673					0.136602	0.0413386					0.0474155	0.0475901					0.0827953	0.0479523					0.0644999	0.0395737					0.21209	0.031872
unit 54	0.599217	0.0130119					0.347028	0.0232924					0.549142	0.0282444					0.404094	0.0257311					0.41379	0.0166345					0.66342	0.0323273
unit 55	0.461954	0.024669					0.273704	0.0151676					0.498675	0.0297142					0.381984	0.00882028					0.259446	0.0387575					0.529582	0.0171187
unit 56	0.67747	0.0150171					0.403646	0.0184653					0.597656	0.00681106					0.555512	0.02984					0.413444	0.0366282					0.74708	0.0117231
unit 57	0.59594	0.0233304					0.370904	0.0429493					0.558707	0.0368727					0.390486	0.0259829					0.365754	0.035968					0.650403	0.0710528
unit 58	0.530699	0.0123129					0.371598	0.0781025					0.582794	0.0114531					0.40994	0.0157018					0.395095	0.0424835					0.710464	0.0471075
Table Analyzed	Ch 129						Table Analyzed	Ch 129					Table Analyzed	Ch 129					Table Analyzed	Ch 129					Table Analyzed	Ch 129					Table Analyzed	Ch 129
Column B	Shuffled						Column B	Shuffled					Column B	Shuffled					Column B	Shuffled					Column B	Shuffled					Column B	Shuffled
vs.	vs.						vs.	vs.					vs.	vs.					vs.	vs.					vs.	vs.					vs.	vs.
Column A	Original						Column A	Original					Column A	Original					Column A	Original					Column A	Original					Column A	Original
Wilcoxon matched-pairs signed rank test							Wilcoxon matched-pairs signed rank test						Wilcoxon matched-pairs signed rank test						Wilcoxon matched-pairs signed rank test						Wilcoxon matched-pairs signed rank test						Wilcoxon matched-pairs signed rank test
P value	<0.0001						P value	<0.0001					P value	<0.0001					P value	<0.0001					P value	<0.0001					P value	<0.0001
Exact or approximate P value?	Exact						Exact or approximate P value?	Exact					Exact or approximate P value?	Exact					Exact or approximate P value?	Exact					Exact or approximate P value?	Exact					Exact or approximate P value?	Exact
P value summary	****						P value summary	****					P value summary	****					P value summary	****					P value summary	****					P value summary	****
Significantly different (P < 0.05)?	Yes						Significantly different (P < 0.05)?	Yes					Significantly different (P < 0.05)?	Yes					Significantly different (P < 0.05)?	Yes					Significantly different (P < 0.05)?	Yes					Significantly different (P < 0.05)?	Yes
One- or two-tailed P value?	Two-tailed						One- or two-tailed P value?	Two-tailed					One- or two-tailed P value?	Two-tailed					One- or two-tailed P value?	Two-tailed					One- or two-tailed P value?	Two-tailed					One- or two-tailed P value?	Two-tailed
Sum of positive, negative ranks	0.000 , -325.0						Sum of positive, negative ranks	1.000 , -324.0					Sum of positive, negative ranks	3.000 , -322.0					Sum of positive, negative ranks	0.000 , -325.0					Sum of positive, negative ranks	2.000 , -323.0					Sum of positive, negative ranks	1.000 , -324.0
Sum of signed ranks (W)	-325						Sum of signed ranks (W)	-323					Sum of signed ranks (W)	-319					Sum of signed ranks (W)	-325					Sum of signed ranks (W)	-321					Sum of signed ranks (W)	-323
Number of pairs	25						Number of pairs	25					Number of pairs	25					Number of pairs	25					Number of pairs	25					Number of pairs	25
Number of ties (ignored)	0						Number of ties (ignored)	0					Number of ties (ignored)	0					Number of ties (ignored)	0					Number of ties (ignored)	0					Number of ties (ignored)	0
Median of differences							Median of differences						Median of differences						Median of differences						Median of differences						Median of differences
Median	-0.1621						Median	-0.1499					Median	-0.2762					Median	-0.2805					Median	-0.2971					Median	-0.1395
How effective was the pairing?							How effective was the pairing?						How effective was the pairing?						How effective was the pairing?						How effective was the pairing?						How effective was the pairing?
rs (Spearman)	0.06						rs (Spearman)	0.1646					rs (Spearman)	0.06615					rs (Spearman)	0.1377					rs (Spearman)	-0.1777					rs (Spearman)	-0.07308
P value (one tailed)	0.3879						P value (one tailed)	0.2158					P value (one tailed)	0.3767					P value (one tailed)	0.2558					P value (one tailed)	0.1977					P value (one tailed)	0.3642
P value summary	ns						P value summary	ns					P value summary	ns					P value summary	ns					P value summary	ns					P value summary	ns
Was the pairing significantly effective?	No						Was the pairing significantly effective?	No					Was the pairing significantly effective?	No					Was the pairing significantly effective?	No					Was the pairing significantly effective?	No					Was the pairing significantly effective?	No

## Sheet: FigS11
	8Hz Polarity Index						12Hz Polarity Index						16Hz Polarity Index						20Hz Polarity Index						15Hz Polarity Index						10Hz Polarity Index
	DCN SU x CB LFP
	8 Hz						12 Hz						16 Hz						20 Hz						15 Hz						10 Hz
	Original	Shuffled					Original	Shuffled					Original	Shuffled					Original	Shuffled					Original	Shuffled					Original	Shuffled
unit 1	0.424871	0.0210167					0.471101	0.00904357					0.482278	0.0186363					0.275161	0.00737793					0.430909	0.00805023					0.291678	0.00426478
unit 2	0.110574	0.00507234					0.17214	0.0136935					0.217436	0.0303131					0.102377	0.0065919					0.215372	0.00359339					0.0464793	0.00665929
unit 3	0.344802	0.0148608					0.459127	0.00224104					0.484442	0.0114039					0.257133	0.019659					0.391577	0.00415863					0.164342	0.00764077
unit 4	0.479341	0.0198568					0.508059	0.0131838					0.535292	0.0110155					0.282842	0.00968108					0.476126	0.007355					0.338418	0.0128751
unit 5	0.267467	0.0136448					0.30203	0.00815629					0.304534	0.00937002					0.152597	0.012776					0.269537	0.00255583					0.192261	0.0127129
unit 6	0.233313	0.020846					0.35678	0.0143051					0.389364	0.0105604					0.199816	0.0179117					0.308159	0.010048					0.116619	0.016446
unit 7	0.406995	0.0296212					0.455708	0.00895447					0.472617	0.0202111					0.240735	0.015686					0.37794	0.0123634					0.237259	0.0103527
unit 8	0.507437	0.0166374					0.540387	0.0129649					0.555554	0.026863					0.295619	0.0075081					0.489321	0.0152326					0.353569	0.0130978
unit 9	0.214355	0.0229195					0.372572	0.0307766					0.413157	0.0170012					0.203632	0.0119529					0.277023	0.0233331					0.140447	0.0170214
unit 10	0.296329	0.0390455					0.303629	0.0391891					0.369127	0.0250739					0.205411	0.0107552					0.247453	0.0215468					0.167063	0.00859906
unit 11	0.166992	0.00609007					0.125526	0.00700016					0.133937	0.00911543					0.108649	0.00308423					0.167247	0.00502301					0.164964	0.015048
unit 12	0.545223	0.00438664					0.417851	0.00749846					0.428854	0.0183519					0.276372	0.0042841					0.525704	0.0124865					0.470042	0.00787764
unit 13	0.24638	0.00609619					0.160469	0.00417311					0.126584	0.00775987					0.0852305	0.00379123					0.148171	0.00987918					0.162912	0.0133015
unit 14	0.158394	0.0109164					0.372902	0.00218306					0.359213	0.0326257					0.228514	0.00503924					0.331576	0.00276117					0.259844	0.0290989
unit 15	0.600061	0.00393077					0.485198	0.013727					0.453208	0.012085					0.289128	0.00639071					0.521612	0.00241504					0.494665	0.00855179
unit 16	0.267355	0.0118286					0.254921	0.00960211					0.229344	0.0119589					0.183125	0.00635817					0.316584	0.0168468					0.214214	0.0221744
unit 17	0.514656	0.0133971					0.444959	0.0104137					0.385007	0.00807813					0.279983	0.00886809					0.483257	0.00277323					0.357507	0.0141373
unit 18	0.61624	0.00623394					0.517834	0.019518					0.461789	0.0130119					0.305923	0.0111623					0.585266	0.00689745					0.494534	0.0105434
unit 19	0.422488	0.016423					0.31484	0.0117358					0.330794	0.0164833					0.27297	0.00934806					0.514569	0.0202086					0.272327	0.0151013
unit 20	0.681282	0.0297625					0.545542	0.010578					0.487112	0.0289988					0.324307	0.0150943					0.619502	0.018139					0.570649	0.0235515
unit 21	0.564271	0.00933471					0.580774	0.0107839					0.509096	0.00887787					0.584835	0.00714509					0.547915	0.00280116					0.597994	0.00288455
unit 22	0.0864065	0.0138737					0.158693	0.0089366					0.129475	0.00940182					0.197382	0.00389992					0.205751	0.0103279					0.132906	0.0186187
unit 23	0.203088	0.00681216					0.267736	0.00849907					0.273226	0.0124652					0.3971	0.0167515					0.348914	0.0066762					0.221583	0.00869436
unit 24	0.706603	0.0222741					0.725695	0.0192556					0.654859	0.0230543					0.749599	0.00902126					0.700275	0.0150691					0.720373	0.00634884
unit 25	0.484836	0.0101616					0.525806	0.0117042					0.502735	0.0109796					0.694914	0.00970495					0.664681	0.013145					0.449315	0.0140518
unit 26	0.327649	0.0137391					0.479252	0.00411659					0.312266	0.0140874					0.456093	0.00837098					0.416235	0.012408					0.481974	0.00872806
unit 27	0.424501	0.00536991					0.415316	0.0119968					0.402993	0.0206542					0.505418	0.0206425					0.499174	0.0114464					0.476278	0.00780557
unit 28	0.677773	0.0069965					0.719296	0.0157328					0.647867	0.0308302					0.7216	0.00919762					0.693232	0.0154735					0.758089	0.0202433
unit 29	0.145977	0.0504599					0.216631	0.0173376					0.362525	0.00636873					0.764216	0.0221901					0.725067	0.0347277					0.159188	0.0350963
unit 30	0.141169	0.00512021					0.0949837	0.0196738					0.11835	0.00670642					0.256707	0.0024469					0.0807781	0.0038507					0.164938	0.0204353
unit 31	0.477938	0.00415555					0.555123	0.0254196					0.472025	0.00360845					0.664065	0.0178151					0.392094	0.00619655					0.504305	0.0163015
unit 32	0.586085	0.00746587					0.697132	0.0143413					0.534578	0.026422					0.622839	0.00671748					0.426548	0.0117692					0.631765	0.0179566
unit 33	0.768223	0.0120868					0.8274	0.0235548					0.634186	0.00770539					0.801007	0.0131057					0.539411	0.0171216					0.709413	0.0108879
unit 34	0.632359	0.0199519					0.706606	0.0262763					0.560767	0.00230422					0.729772	0.013847					0.48097	0.0160357					0.631269	0.015455
unit 35	0.622365	0.00431578					0.724591	0.0251532					0.51874	0.00682523					0.648516	0.019867					0.425279	0.012569					0.575792	0.00938676
unit 36	0.649034	0.0118895					0.648079	0.0244317					0.512955	0.00455362					0.734101	0.0172253					0.383328	0.0144526					0.517511	0.0178749
unit 37	0.292961	0.00693333					0.265415	0.046892					0.23924	0.0245719					0.198037	0.00256606					0.166253	0.0113182					0.274367	0.0366426
unit 38	0.231692	0.00458703					0.207691	0.00322595					0.259339	0.0152013					0.324064	0.00960538					0.26787	0.0102684					0.242604	0.00180794
unit 39	0.583717	0.00842214					0.494905	0.0201569					0.460755	0.010209					0.521391	0.0144385					0.507344	0.0121745					0.560491	0.0197746
unit 40	0.371808	0.012263					0.392979	0.0322847					0.397265	0.00977825					0.42004	0.000539977					0.402912	0.0141132					0.435628	0.0183224
unit 41	0.31689	0.0116421					0.347324	0.0207582					0.308332	0.00499512					0.291166	0.00955757					0.324865	0.018117					0.42064	0.0271484
unit 42	0.197968	0.0285057					0.0963259	0.0196205					0.133309	0.0139432					0.110574	0.0136351					0.15459	0.0193798					0.088442	0.0183691
unit 43	0.395803	0.0334879					0.326159	0.00203801					0.443354	0.0127043					0.522941	0.00932902					0.459536	0.0114302					0.418992	0.0125929
unit 44	0.233529	0.00987364					0.487889	0.0241825					0.157909	0.0100226					0.447108	0.0220702					0.292362	0.0100424					0.291576	0.0103706
unit 45	0.634611	0.0296085					0.496722	0.0333243					0.472969	0.0084464					0.592502	0.0236141					0.516375	0.019882					0.628188	0.0270413
unit 46	0.119982	0.0153124					0.123428	0.00733003					0.181807	0.00926993					0.181922	0.00332655					0.136416	0.0182184					0.109985	0.0118867
unit 47	0.611939	0.0255761					0.53861	0.00793666					0.612299	0.0075182					0.729079	0.00954974					0.574431	0.0209763					0.648074	0.0118491
unit 48	0.455595	0.0319136					0.330809	0.0175534					0.346013	0.0141952					0.516378	0.0177462					0.393886	0.0201164					0.462648	0.0235691
unit 49	0.579446	0.0186975					0.516328	0.00705298					0.592718	0.0152878					0.716029	0.0146841					0.558872	0.0139878					0.610498	0.021935
unit 50	0.476375	0.0185713					0.371523	0.0203809					0.484901	0.00994543					0.506984	0.0132248					0.385287	0.0181881					0.473845	0.0136908
unit 51	0.41966	0.0173923					0.340817	0.0126818					0.392156	0.0161592					0.488661	0.0165172					0.406863	0.031445					0.44103	0.00464422
unit 52	0.278104	0.0325923					0.323642	0.0152976					0.455792	0.0195602					0.50976	0.0269883					0.494054	0.0524288					0.384465	0.0377227
unit 53	0.121308	0.0461828					0.141684	0.0173093					0.0672701	0.0469707					0.297859	0.0671468					0.0414061	0.0587275					0.173665	0.0634294
unit 54	0.531877	0.0126681					0.506096	0.0153029					0.571776	0.0164352					0.591551	0.0103734					0.575618	0.0276975					0.574167	0.0236919
unit 55	0.395421	0.0187639					0.358186	0.0127717					0.523128	0.0305886					0.58683	0.0426746					0.493835	0.0268539					0.407081	0.0251529
unit 56	0.61811	0.0276168					0.553971	0.00980902					0.632146	0.0213628					0.737803	0.0253796					0.615162	0.0397573					0.662498	0.0602479
unit 57	0.511737	0.0179768					0.531371	0.0257978					0.538183	0.00225305					0.65169	0.0118443					0.589027	0.0326536					0.527088	0.032477
unit 58	0.466182	0.0184233					0.531507	0.0509643					0.628273	0.0183105					0.724827	0.0501206					0.597826	0.0264562					0.633077	0.0282225
Table Analyzed	Ch 10-11						Table Analyzed	Ch 10-11					Table Analyzed	Ch 10-11					Table Analyzed	Ch 10-11					Table Analyzed	Ch 10-11					Table Analyzed	Ch 10-11
Column B	Shuffled						Column B	Shuffled					Column B	Shuffled					Column B	Shuffled					Column B	Shuffled					Column B	Shuffled
vs.	vs.						vs.	vs.					vs.	vs.					vs.	vs.					vs.	vs.					vs.	vs.
Column A	Original						Column A	Original					Column A	Original					Column A	Original					Column A	Original					Column A	Original
Wilcoxon matched-pairs signed rank test							Wilcoxon matched-pairs signed rank test						Wilcoxon matched-pairs signed rank test						Wilcoxon matched-pairs signed rank test						Wilcoxon matched-pairs signed rank test						Wilcoxon matched-pairs signed rank test
P value	<0.0001						P value	<0.0001					P value	<0.0001					P value	<0.0001					P value	<0.0001					P value	<0.0001
Exact or approximate P value?	Exact						Exact or approximate P value?	Exact					Exact or approximate P value?	Exact					Exact or approximate P value?	Exact					Exact or approximate P value?	Exact					Exact or approximate P value?	Exact
P value summary	****						P value summary	****					P value summary	****					P value summary	****					P value summary	****					P value summary	****
Significantly different (P < 0.05)?	Yes						Significantly different (P < 0.05)?	Yes					Significantly different (P < 0.05)?	Yes					Significantly different (P < 0.05)?	Yes					Significantly different (P < 0.05)?	Yes					Significantly different (P < 0.05)?	Yes
One- or two-tailed P value?	Two-tailed						One- or two-tailed P value?	Two-tailed					One- or two-tailed P value?	Two-tailed					One- or two-tailed P value?	Two-tailed					One- or two-tailed P value?	Two-tailed					One- or two-tailed P value?	Two-tailed
Sum of positive, negative ranks	3.000 , -322.0						Sum of positive, negative ranks	2.000 , -323.0					Sum of positive, negative ranks	4.000 , -321.0					Sum of positive, negative ranks	0.000 , -325.0					Sum of positive, negative ranks	1.000 , -324.0					Sum of positive, negative ranks	1.000 , -324.0
Sum of signed ranks (W)	-319						Sum of signed ranks (W)	-321					Sum of signed ranks (W)	-317					Sum of signed ranks (W)	-325					Sum of signed ranks (W)	-323					Sum of signed ranks (W)	-323
Number of pairs	25						Number of pairs	25					Number of pairs	25					Number of pairs	25					Number of pairs	25					Number of pairs	25
Number of ties (ignored)	0						Number of ties (ignored)	0					Number of ties (ignored)	0					Number of ties (ignored)	0					Number of ties (ignored)	0					Number of ties (ignored)	0
Median of differences							Median of differences						Median of differences						Median of differences						Median of differences						Median of differences
Median	-0.1445						Median	-0.222					Median	-0.2209					Median	-0.2106					Median	-0.2919					Median	-0.2519
How effective was the pairing?							How effective was the pairing?						How effective was the pairing?						How effective was the pairing?						How effective was the pairing?						How effective was the pairing?
rs (Spearman)	-0.08154						rs (Spearman)	0.09846					rs (Spearman)	-0.01					rs (Spearman)	0.4331					rs (Spearman)	0.4715					rs (Spearman)	-0.2108
P value (one tailed)	0.3492						P value (one tailed)	0.3198					P value (one tailed)	0.4811					P value (one tailed)	0.0153					P value (one tailed)	0.0087					P value (one tailed)	0.1559
P value summary	ns						P value summary	ns					P value summary	ns					P value summary	*					P value summary	**					P value summary	ns
Was the pairing significantly effective?	No						Was the pairing significantly effective?	No					Was the pairing significantly effective?	No					Was the pairing significantly effective?	Yes					Was the pairing significantly effective?	Yes					Was the pairing significantly effective?	No

## Sheet: Fig. S12 C,F,G,H,K,L,M,N,O
FigS12C							FigS12F								FigS12G							FigS12H						FigS12K										FigS12L										FigS12M
Light Off	Light On	Duty Cycle On	Duty Cycle Off				VSS 10%	VSS 20%	VSS 40%	VSS 80%	CB LFP				VSS 10%	VSS 20%	VSS 40%	VSS 80%				CB Frequency	Populational Coding Frequency					Baseline	8 hz	12 hz	16 hz	20 hz	15 hz	10 hz				Baseline	8 hz	12 hz	16 hz	20 hz	15 hz	10 hz				CB Frequency	Motion Frequency
80.5163	213.951	444.499	136.352				-10.35	-10.08	-10.09	-4.14	0				374.883	256.978	393.433	707.659				8	8					68.8951	281.337	1685.64	1083.99	587.309	1205.99	1861.01				63.2657	1000.59	2228.3	1903.92	820.967	1569.95	1249.56				8	8
57.0473	75.0431	177.718	83.668				-4.3	-4.16	0	0	0				18.3064	93.2391	156.362	430.074				12	12					38.8305	2783.79	3699.72	2644.95	1175.27	2597.23	2174.59				55.2144	1286.48	3287	4887.94	3137.18	3144.06	2030.2				12	12
31.0567	99.8157	213.778	77.6257				0	-0.01	1.73	13.6	0				315.207	222.94	465.093	390.68				16	16					24.0195	765.738	4785.74	1826.43	1305.33	2031.83	2536.69				15.3669	785.571	1944	2591.78	2617.79	2983.69	570.931				16	16
25.5366	56.0868	91.3281	67.8582				7.36	1.76	0	0	0				96.8811	564.727	637.221	490.429				20	20					39.4749	610.478	767.822	763.554	808.625	865.72	1494.32				37.9246	856.217	810.348	1810.03	1038.96	1320.36	531.599				20	20
20.7652	88.6368	157.695	76.6263				13.51	7.68	13.57	-4.14					101.812	297.323	570.184	529.172				15	15					27.4708	1171.01	862.913	4103.29	720.182	940.1	1787.98				12.1119	1628.48	1368.9	2635.35	1712.6	1917.76	1636.34				15	15
36.4676	38.4683	66.5934	48.8379				-13.49	13.58	-10.09	0					189.159	537.192	1071.42	643.237				10	10					18.9759	2398.29	1705.96	1233.88	889.894	1317.23	2906.26				6.73232	1026.49	2197.99	3664.18	825.102	2260.39	1682.47				10	10
34.2343	43.8309	69.8098	42.5836				-12.07	-8.42	-4.15	1.74					263.661	441.005	675.179	548.764				8	8					40.7115	878.825	3216.52	1252.16	1325.82	1285.9	5937.86				3.70449	352.871	322.672	258.903	419.638	172.323	261.359				8	8
27.4219	45.3275	112.393	31.6803				-10.72	0	0	13.6					252.268	383.735	365.219	554.134				12	12					80.8693	2963.92	12093	3913.15	2819.95	2508.01	9605.35				19.6232	1381.88	1379.52	2156.88	1745.76	833.432	672.529				12	12
32.3788	35.1237	67.8618	34.1335				-8.51	0	1.73	0					92.1815	116.257	325.428	362.666				16	16					18.4107	537.666	1567.92	1642.58	956.088	1328.78	1931.78				13.6012	566.723	800.348	895.057	711.393	403.667	412.485				16	16
11.6401	27.108	46.7966	29.545				-4.62	0	7.68	-4.14					84.9519	134.41	505.763	490.707				20	20																									20	20
5.04303	54.3521	143.425	28.3033				-2.29	0	13.57	0					164.081	280.694	836.273	700.93				15	15																									15	15
59.4428	45.1028	36.2023	47.9936				0	1.68	-4.11	13.59					308.43	161.215	589.387	500.438				10	10																									10	10
26.4636	35.1555	49.4946	45.198				1.82	0	0	0					223.391	210	483	911.094				8	8																									8	8
23.3714	30.1818	31.2574	36.5694				3.34	1.66	0	0					308.608	749.384	606.839	720.415				12	12																									12	12
9.00126	101.093	298.646	41.6015				6.04	0	0	0					308.608	153.015	321.701	468.426				16	16																									16	16
0.258504	15.4988	124.304	10.2757				7.57	0	-4.13	-4.15					138.463	534.872	928.494	415.262				20	20																									20	20
34.5218	260.784	658.032	127.293				12.26	-4.17	0	0					203.52	458.439	689.667	840.308				15	15																									15	15
33.6978	131.041	428.566	81.5339				-14.38	-2.37	0	0					92.1815	335.084	473.363	357.704				10	10																									10	10
12.7537	167.863	538.033	75.3182				-7.95	0	1.69	0					18.3064	105.492	170.375	644.412				8	8																									8	8
1.71749	110.945	433.034	38.6621				-0.01	1.71	13.54	0					26.9791	41.6466	353.172	545.678				12	12																									12	12
100.708	29.468	82.5666	11.5986				3.51	7.64	0	1.72					257.225	343.906	358.511	665.13				16	16																									16	16
52.1107	95.0659	193.896	69.2438				13.45	11.78	-10.07	0					21.3382	432.346	549.393	727.913				20	20																									20	20
22.8719	147.544	403.805	83.2619				-11.58	13.62	-4.15	0					284.722	587.717	635.479	491.217				15	15																									15	15
0.749031	69.7558	259.495	30.3197				-9.67	-10.06	0	-4.15					85.4345	214.419	199.684	503.005				10	10																									10	10
0.709259	62.8448	217.713	28.2631				-6.42	-4.15	1.74	0					437.555	981.342	807.71	864.238																														8	8
							-4.05	-0.01	7.68	0					378.982	594.236	416.133	388.242																														12	12
							0	1.76	13.6	0					94.2831	164.647	465.148	548.39																														16	16
							1.69	7.68	0	0					57.0494	228.223	276.109	434.879																														20	20
							3.16	13.59	1.69	-4.14					137.169	466.462	736.149	455.908																														15	15
							6.6	-9.28	13.54	0					203.454	176.251	539.389	661.201																														10	10
							7.7	-4.15	0	1.73					147.968	268.469	401.218	656.48																														8	8
							9.12	0	1.69	13.59					149.129	139.769	549.023	446.471																														12	12
							12.32	1.71	13.5	0					227.301	452.398	587.04	591.035																														16	16
							13.53	7.68	-10.08	13.59					101.812	123.372	283.174	373.525																														20	20
							-10.12	13.53	-4.15	0					305.605	426.216	685.322	395.5																														15	15
							-8	0	0	0					48.3081	160.439	314.725	428.96																														10	10
							-4.21	-10.08	1.72	-4.14					312.268	451.035	1008.49	1003.4																														8	8
							0	-4.15	7.7	0					202.856	632.252	326.619	681.028																														12	12
							1.77	0	13.58	-4.14					511.399	1981.3	560.531	524.477																														16	16
							4.31	1.74	-4.14	0					90.486	99.3513	229.258	655.932																														20	20
							6.18	7.72	0	1.73					159.024	332.426	1066.41	753.819																														15	15
							7.58	13.61	1.74	13.59					223.02	344.174	553.151	630.57																														10	10
							10.26	-10.08	13.61	0					51.0413	162.924	682.985	764.988																														8	8
							12.24	-4.15	-4.16	0					388.846	548.033	439.52	563.479																														12	12
							-12.23	0	0	0					284.722	268.054	433.69	456.127																														16	16
							-10.07	1.72	1.74	0					57.0494	240.767	674.784	562.583																														20	20
							-5.79	7.68	13.6	-4.14					72.5754	357.759	393.112	678.993																														15	15
							0	13.57	0	0					276.219	231.679	667.371	745.76																														10	10
							1.69	-10.06	-10.07	1.74					381.723	742.428	781.249	706.768																														8	8
							5.49	-4.16	-4.15	13.59					118.28	396.401	722.229	492.829																														12	12
							7.65	0	0	0					83.3047	354.161	1071.65	560.95																														16	16
							13.5	1.76	1.74	0					36.1512	156.972	518.178	501.213																														20	20
							-8.55	7.69	7.67	-4.14					263.661	241.773	408.366	511.668																														15	15
							0	11.94	13.59	0					91.9177	142.205	249.825	446.236																														10	10
							8.02	13.6	-4.16	1.73					174.477	220.702	204.612	557.217
							12.27	0	0	13.59					134.944	159.236	390.484	505.115
							13.57	13.48	13.59	-4.14					437.555	481.13	337.529	343.907
							-14.59	-10.07	-4.14	0					182.935	674.698	590.562	517.062
							-13.79	-4.15	0	1.73					243.061	171.153	394.373	382.335
							-12.17	0	1.72	13.59					417.657	359.721	602.223	472.636
							-11.23	1.75	7.68	-4.14					272.896	263.677	301.714	437.064
							-8.59	7.66	13.59	0					225.9	193.348	483.537	657.023
							-6.47	13.59	-10.08	13.6					498.836	967.129	2301.96	1528.79
							-4.69	0	-4.14	0					96.5014	1313.5	2059.79	535.122
							-3.91	1.69	0	-4.14					56.6024	175.796	328.483	870.796
							0	13.55	1.75	0					233.2	183.042	637.312	438.932
							2.24	0	13.61	13.59					388.846	694.658	941.287	1279.05
							5.76	-4.15	0	-4.14					26.9791	99.1	189.561	427.919
							8.01	0	-10.08	0					116.706	368.463	305.006	459.952
							9.74	1.77	-4.15	13.59					101.98	962.016	917.514	801.924
							-13.56	7.68	0	0					100.319	363.903	302.793	505.099
							-11.02	13.61	1.73	0					494.944	508.343	355.227	641.26
							-10.08	-0.01	13.59	0					100.478	416.669	395.745	443.907
							-8.99	-10.09	0	-4.15					196.712	307.306	525.473	723.9
							-6.9	-4.17	-4.13	0					121.765	227.035	254.77	702.893
							-4.2	0.01	0	0					66.6263	220.406	447.41	544.07
							0	1.7	1.74	-4.14					124.894	634.776	790.903	537.7
							1.69	7.64	13.6	0					110.029	135.047	246.495	407.518
							3.88	13.56	0	13.61					123.962	264.103	234.652	339.866
							5.04	-10.08	0	-4.15					45.0437	148.158	708.221	689.112
							7.68	-4.18	1.72	0					134.658	106.856	452.061	685.128
							11.47	0	-10.08	13.58					203.454	192.559	808.058	557.269
							13.56	1.7	-4.13	-4.15					203.454	517.466	610.415	710.84
							-13.49	7.64	0	0					189.333	168.383	349.727	516.039
							-11.57	13.55	1.73	13.59					252.372	855.39	1130.94	464.904
							-10.07	-4.13	13.57	0					308.608	812.013	380.579	604.111
							-7.74	0	0	0					478.764	271.72	753.86	629.435
							-4.14	1.7	-4.12	0					203.454	336.286	613.781	1445.94
							-2.66	13.58	0	0					585.693	363.179	1017.27	992.238
							-0.01	-10.09	1.71	0					168.107	238.996	513.094	517.65
							1.76	-4.13	7.68	-4.14					82.6818	277.338	257.443	485.04
							3.44	0	13.56	0					72.5046	373.837	576.533	1059.58
							5.44	1.72	-4.14	1.73					314.263	1380.92	2218.87	1391.15
							6.41	7.68	0	13.59					116.706	207.557	307.635	829.154
							7.7	0	1.72	0					363.016	326.993	1374.29	499.482
							9.78	-4.12	13.57	13.59					57.4384	443.28	673.301	561.997
							12.45	-0.01	0	0					126.934	391.257	551.3	534.036
							13.59	1.73	-4.12	-4.15					455.781	449.101	264.378	466.445
							-13.13	8.35	0	0					113.83	290.451	232.771	734.79
							-9.17	13.6	13.6	1.73					112.053	386.454	678.119	478.302
							-6.4	0	-10.08	13.59
							-3.57	13.52	-4.15	0
							0	-13.62	0	-4.14
							1.7	-4.15	1.73	0
							2.96	0	7.66	1.74
							4.03	1.69	13.58	13.59
							7.74	13.53	-10.07	0
							9.24	-10.08	-4.14	-4.14
							13.49	-4.16	0	0
							-13.56	0	1.74	0
							-11.22	1.72	7.68	0
							-7	7.61	13.59	-4.15
							-4.72	13.57	-10.08	0
							0	-13.6	-4.12	1.73
							2.56	-6.37	0	13.59
							8.91	-4.07	13.62	0
							11.33	0	0	0
							-10.06	1.7	-10.07	-4.14
							-4.15	8.24	-4.14	0
							-0.01	13.6	0	0
							1.76	-4.13	1.73	-4.14
							3.52	-0.01	13.58	0
							7.72	1.79	-4.14	1.73
							13.62	13.61	0	13.59
							-6.52	-10.09	1.72	0
							0	-4.16	13.59	0
							9.45	0	-10.08	-4.13
							12.19	1.73	-4.13	0
							13.53	7.66	0	13.59
							-6.52	13.59	1.71	0
							0	-0.01	7.68	0
							9.45	8.29	13.56	0
							12.19	-10.07	-4.15	0
							13.53	-4.14	0	0
							-11.82	0	1.71	0
							-7.89	1.73	13.56	0
							-5.77	7.71	-10.08	-4.15
							-4.42	13.64	-4.16	0
							-0.01	-4.15	0	1.73
							7.54	0.01	1.72	13.59
							13.37	1.71	13.55	-4.15
							-13.41	7.67	0	0
							-11.75	13.57	1.69	13.59
							-10.07	-10.07	-10.07	-4.15
							-7.66	-4.14	-4.15	0
							-6.66	0	0	1.73
							-4.14	1.73	1.74	13.57
							-2.45	7.63	13.61	0
							-0.01	13.6	-10.08	0
							1.76	-10.07	-4.15	0
							3.46	-4.13	0	-4.15
							5.18	-0.01	1.73	0
							6.58	1.72	7.67	1.73
							7.7	7.71	13.58	13.59
							9.41	13.59	-4.15	-4.15
							13.59	-10.07	0	0
							-13.56	-4.12	1.73	1.73
							-11.02	0	13.6	13.59
							-10.08	1.73	-4.14	-4.15
							-8.99	7.66	0	0
							-6.9	13.57	1.74	-4.14
							-4.2	-10.08	13.6	0
							0	-4.15	0	13.6
							1.69	0.01	0	0
							3.88	1.72	1.69	13.58
							5.04	7.62	-10.08	-4.14
							7.68	13.54	-4.15	0
							11.47	-10.08	0	13.59
							13.56	-4.16	1.73	-4.14
							-13.49	0	7.68	0
							-12.07	1.71	13.59	0
							-10.72	7.66	-10.08	0
							-8.51	13.54	0	0
							-4.62	-10.11	1.72	0
							-2.29	-4.17	13.55	0
							0	0	-10.07	0
							1.82	1.69	-4.15	0
							3.34	7.64	0	-4.15
							6.04	13.52	1.73	0
							7.57	-10.04	7.68	13.59
							12.26	-4.15	13.57	-4.14
							-13.09	-1.68	-4.16	0
							-11	0	0	0
							-9.2	1.76	1.72	0
							-8.44	7.62	13.58
							-5.8	13.59	0
							-3.79	-10.09	0
							-1.53	-4.13	13.5
							0	0	0
							0.91	1.73	-10.07
							1.74	7.68	-4.14
							5.77	13.6	0
							7.76	-9.39	1.73
							11.43	-4.15	7.67
							12.37	0	13.59
							13.54	1.72	-4.13
							-11.84	7.64	0
							-10.72	13.57	13.6
							-4.18	-4.11	-10.08
							-0.01	0	-4.16
							1.8	1.66	0
							6.82	5.38	1.73
							9.24	7.65	13.59
							13.48	13.54	-10.05
							-10.72	0	-4.13
							-8.74	1.76	0
							-6.42	13.57	13.62
							-4.15	-10.11	-10.08
							-2.25	-4.13	-4.13
							0.04	0	0
							1.71	1.69	1.73
							3.28	5.14	7.64
							4.92	7.67	13.59
							7.66	13.56	-4.17
							12.26	-10.07	0
							13.58	-4.15	13.6
							-10.07	0	-10.07
							-4.17	1.73	-4.15
							0.01	7.66	0
							1.71	13.55	1.73
							5.51	-10.04	7.66
							7.62	-4.13	13.57
							13.54	0	0
							-14.29	1.71	1.7
							-11.84	7.62	13.54
							-7.93	13.51	-10.09
							-6.42	-10.07	-4.14
							-4.15	-4.15	0
							-2.38	0	1.73
							0	1.74	13.59
							1.8	7.68	-10.07
							4.15	13.58	-4.14
							8.28	-10.04	0
							9.51	-4.16	1.74
							11.85	0.01	7.69
							13.66	1.73	13.6
							-8.69	7.63	0
							0	13.57	-10.07
							12.07	-8.67	-4.14
							-13.56	0	0
							-11.71	-8.46	1.73
							-6.34	0	13.59
							-4.72	1.66	0
							0	7.64	1.71
							8.8	13.48	13.54
							-14.51	0	0
							-13.01	7.74	-10.08
							-9.39	13.53	-4.14
							-4.53	-10.08	0
							-1.52	-6.68	1.72
							-0.01	-4.13	7.66
							2.15	-0.01	13.57
							5.95	1.76	-4.14
							7.91	5.67	0
							10.09	7.67	1.73
							13.47	13.6	13.58
							-11.5	0	-4.15
							-10.55	-10.08	0
							-4.02	-4.15	1.74
							0.01	0	13.58
							1.7	1.72	-10.08
							6.52	7.69	-4.14
							7.68	13.6	0
							12.36	-10.05	1.76
							13.55	-4.13	13.62
							-13.63	0	0
							-11.92	1.79	0
							-10.04	3.52	1.7
							-4.17	7.71	13.56
							-2.39	13.62	-4.15
							0	0	0
							1.71	-10.09	1.73
							4.15	-4.17	13.58
							7.58	0	-10.07
							10.57	1.73	-4.15
							11.85	7.71	0
							13.56	13.62	1.74
							-13.6	-10.07	7.68
							-12.05	-4.15	13.59
							-10.07	0	-10.08
							-8.61	1.74	-4.15
							-6.43	7.6	0
							-4.14	13.59	1.75
							-1.57	0	7.66
							0.01	-10.09	13.59
							1.77	-4.15	-4.16
							5.47	0	0
							7.58	1.72	13.61
							13.63	7.69	-4.13
							-11.2	13.6	0
							-8.76	-10.07	13.6
							-6.38	-4.15	-10.08
							-3.83	0	-4.14
							0	1.75	0
							1.67	7.7	1.74
							7.69	13.61	7.69
							13.57	0	13.6
							-9.78	-10.07	-4.16
							-3.88	-4.13	0
							-0.02	0	13.6
							8.56	1.72	-10.09
							12.12	7.68	-4.15
							-11.49	13.6	0
							-9.35	-10.04	1.74
							-6.79	-4.13	13.62
							-4.18	0.01	-10.09
							0	1.73	-4.16
							5.51	7.67	0
							10.34	13.54	1.73
							13.52	0	7.68
							-10.12	1.66	13.6
							-8	13.49	-4.16
							-4.21	-10.08	0
							0	-4.14	1.72
							1.77	-2.38	13.6
							4.31	0	-10.07
							6.18	1.73	-4.15
							7.58	7.68	0
							10.26	13.58	1.75
							12.24	-10.08	13.59
							-10.11	-4.14	-10.08
							-8.16	0	-4.16
							0	1.75	0
							9.48	7.68	1.72
							-11.87	13.6	7.68
							-10.08	-10.06	13.57
							-4.17	-4.14	-10.08
							-2.42	0	-4.14
							0	1.75	0
							1.72	13.61	1.73
							4.1	-4.16	13.6
							9.69	0	-10.08
							11.82	1.74	-4.15
							13.62	13.6	0
							-10.06	0	1.72
							-4.17	1.7	7.7
							0	7.68	13.59
							1.72	13.52	-10.07
							7.62	-10.11	-4.14
							13.55	-4.16	0
							-9.67	0	1.72
							-6.83	1.69	7.66
							-2.63	5.07	13.54
							-0.01	7.66	-10.09
							6.55	13.54	-4.15
							8.35	-10.06	0.01
							12.09	-4.15	1.72
							-10.09	0	7.66
							-4.17	1.74	13.58
							0.01	7.68	0
							1.7	13.6	1.71
							3.39	-10.07	13.54
							5.58	-4.19	0
							7.61	0	-4.15
							13.52	1.7	0
							-13.52	7.66	1.75
							-12.05	13.52	13.6
							-10.82	-10.07	0
							-8.74	-4.13	-10.07
							-5.74	0.01	-4.15
							-3.95	1.74	0
							-2.27	7.68	1.73
							0	13.57	-4.15
							2.2	-4.16	0
							3.46	0	1.74
							4.91	1.75	13.6
							6.09	13.61	-4.12
							6.99	-4.2	0
							10.93	0	1.73
							12.13	1.69	7.68
							13.79	7.64	13.59
							-12.06	13.56	-4.12
							-9.55	-13.62	0
							-4.54	-10.08	1.72
							-0.01	-4.16	7.69
							12.43	0	13.57
							-10.08	1.73	0
							-4.19	5.67
							0.01	7.66
							1.7	13.57
							3.23	-4.16
							5.57	0
							7.6	1.77
							13.52	13.63
							-13.63	-10.11
							-11.87	-4.16
							-10.03	0
							-6.41	1.75
							-4.15	13.64
							-1.71	-10.08
							0.01	-4.16
							1.78	0
							4.13	1.73
							5.8	7.71
							10.24	13.59
							11.85	-4.16
							13.62	0
							-13.48	1.73
							-12.48	13.58
							-10.07	-10.07
							-7.76	-4.15
							-4.13	0
							-2.47	1.75
							0	13.61
							1.76	-10.06
							3.52	-4.14
							7.7	-0.01
							11.21	1.75
							13.6	7.74
							-10.07	13.6
							-4.17	-10.07
							0.01	-4.13
							1.71	0
							5.51	1.73
							7.62	13.61
							13.54	-10.07
							-11.5	-4.16
							-10.55	0
							-4.02	1.73
							0.01	7.7
							1.7	13.61
							6.52	-10.08
							7.68	-7.74
							12.36	-4.12
							13.55	-0.01
							-14.4	1.73
							-13.45	7.67
							-9.87	13.57
							-9.02	-4.14
							-5.59	0.01
							-3.33	1.71
							-0.01	7.6
							1.77	-4.14
							3.93	0
							7.7	1.71
							9.24	13.53
							11.4	0
							13.49	1.66
							-10.09	13.48
							-6.66	-11.86
							-4.18	-4.2
							-0.01	0
							5.18	1.71
							10.3	7.64
							12.17	13.53
							13.71	0
							-10.03	-10.05
							-6.68	-4.11
							-4.17	0
							0	1.77
							1.7	7.71
							7.63	13.59
							13.52	-4.15
							-12.45	0
							-10.07	1.76
							-4.19	13.62
							-2.52	0
							0.01	0
							1.71	1.65
							5.79	7.68
							7.62	13.54
							13.51	-10.07
							-12.46	-4.14
							-10.07	-0.01
							-5.92	1.74
							-4.16	7.72
							-2.46	13.57
							0.04
							1.74
							3.44
							5.8
							7.68
							10.03
							13.6
							-10.04
							-6.42
							-4.15
							-1.58
							0.09
							1.75
							5.25
							7.65
							13.6
							-8.55
							0
							8.02
							12.27
							13.57
							-12.96
							-9.3
							-1.69
							0
							1.69
							5.83
							7.72
							10.49
							13.49
							-9.89
							-3.95
							0.01
							1.69
							3.92
							7.68
							13.54
							-13.19
							-10.92
							-9.31
							-6.66
							-4.12
							-0.01
							2.19
							5.67
							7.7
							10.26
							12.29
							13.55
							-8.69
							0
							12.07
							-14.48
							-10.08
							-8.54
							-6.43
							-4.15
							-2.34
							0
							1.76
							3.42
							5.79
							7.71
							9.94
							13.63
							-10.06
							-4.13
							0
							1.78
							3.58
							7.71
							13.63
							-13.69
							-11.92
							-10.74
							-7.81
							-5.78
							-3.93
							0
							2.29
							3.6
							5.33
							7.51
							12.88
							-10.07
							-4.18
							0
							1.64
							9.7
							13.49
							-11.79
							-10.34
							-8.67
							-4.55
							-2.23
							0
							3.14
							5.47
							7.54
							12.87
							-8.11
							0
							7.45
							-13.56
							-10.08
							-4.15
							0
							1.75
							7.71
							10.01
							13.62
							-13.56
							-10.07
							-7.68
							-4.14
							-2.44
							0
							1.74
							5.13
							6.49
							7.7
							9.71
							13.59
							-4.24
							0
							12.31
							-13.48
							-12.48
							-10.07
							-7.76
							-4.13
							-2.47
							0
							1.76
							3.52
							7.7
							11.21
							13.6
							-13.09
							-11
							-9.2
							-8.44
							-5.8
							-3.79
							-1.53
							0
							0.91
							1.74
							5.77
							7.76
							11.43
							12.37
							13.54
							-13.69
							-10.13
							-6.93
							-4.4
							0
							1.67
							5.58
							7.61
							13.46
							-13.65
							-11.89
							-8.72
							-6.41
							-4.13
							-2.36
							0
							1.77
							4.14
							8.26
							9.66
							10.72
							11.86
							13.66
							-13.41
							-11.63
							-8.53
							-4.2
							-2.78
							0
							1.7
							5.58
							7.58
							12.24
							13.48
							-13.6
							-12
							-10.03
							-4.13
							0.01
							1.77
							4.01
							7.57
							13.62
							-13.51
							-12.14
							-10.12
							-8.6
							-5.69
							-4.37
							-2.29
							0
							1.71
							3.4
							4.85
							6.02
							7.61
							13.53
							-9.59
							-6.42
							-4.09
							0.01
							1.7
							7.67
							13.56
							-13.35
							-10.06
							-8.18
							-6.42
							-4.17
							0
							1.76
							5.01
							7.67
							9.3
							10.36
							11.49
							13.56
							-13.58
							-10.08
							-7.88
							-4.64
							-2.75
							0
							1.7
							5.79
							7.61
							10.52
							13.48
							-13.61
							-10.08
							-6.93
							-4.22
							-2.42
							0
							1.69
							7.67
							13.5
							-13.63
							-11.82
							-4.15
							-2.42
							0
							4.11
							11.86
							13.62
							-13.56
							-10.09
							-8.45
							-6.32
							-4.15
							-1.54
							0
							1.75
							5.43
							7.56
							8.8
							10.06
							13.62
							-13.58
							-11.96
							-10.78
							-8.6
							-5.75
							-4.42
							-2.25
							0
							1.61
							3.23
							4.8
							6.1
							7.5
							12.95
							-13.03
							-9.36
							-8.44
							-4.51
							0
							2.24
							5.76
							8.02
							10.17
							12.99
							-13.6
							-12.05
							-10.07
							-8.61
							-6.43
							-4.14
							-1.57
							0.01
							1.77
							5.47
							7.58
							13.63
							-13.6
							-12.05
							-10.07
							-8.61
							-6.43
							-4.14
							-1.57
							0.01
							1.77
							5.47
							7.58
							13.63
							-12.46
							-10.07
							-8.38
							-5.9
							-4.16
							-2.39
							0
							1.74
							3.5
							5.88
							7.7
							10.08
							13.59
							-10
							-6.43
							-4.15
							-1.64
							0
							1.77
							9.7
							13.61
							-6.52
							0
							9.45
							12.19
							13.53
							-13.51
							-11.69
							-6.36
							0
							8.95
							-13.6
							-12.05
							-10.07
							-8.61
							-6.43
							-4.14
							-1.57
							0.01
							1.77
							5.47
							7.58
							13.63
							-11.74
							-9.38
							-6.66
							-4.18
							-0.01
							6.71
							9.27
							-8.4
							-5.78
							-3.93
							-2.58
							-0.01
							3.14
							5.63
							8.32
							-10.07
							-4.17
							-2.77
							0.02
							1.72
							5.68
							7.61
							9.78
							13.52
							-13.63
							-11.82
							-6.55
							-4.16
							-2.42
							-0.01
							1.78
							4.1
							6.68
							10.66
							11.87
							13.62
							-11.45
							-10.12
							-7.95
							-6.73
							-4.19
							0
							3.66
							8.25
							9.28
							10.32
							12.28
							-13.69
							-10.13
							-6.93
							-4.4
							0
							1.67
							5.58
							7.61
							13.46
							-12.03
							-8.78
							-3.91
							0
							2.27
							4
							10.75
							-13.49
							-12.1
							-10.08
							-8.63
							-5.75
							-4.14
							-2.3
							-0.03
							1.77
							3.43
							4.96
							7.7
							11.11
							13.62
							-14.28
							-11.84
							-9.55
							-6.41
							-4.15
							-2.45
							-1.76
							0
							1.77
							4.15
							6.61
							8.29
							9.65
							11.87
							13.58
							-14.47
							-9.63
							0
							7.72
							9.45
							-8.83
							-6.42
							-3.95
							-2.23
							0.01
							1.68
							3.17
							5.23
							7.68
							13.56
							-14.45
							-13.44
							-12.33
							-10.06
							-7.76
							-5.29
							-4.13
							-0.02
							1.78
							3.5
							7.71
							13.58

## Sheet: Fig. S13 D,H,L,P,T,X
FigS13
DCN SU x CB LFP
	8 Hz						12 Hz						16 Hz						20 Hz						15 Hz						10 Hz
	Original	Shuffled		Table Analyzed	Ch 10-11		Original	Shuffled		Table Analyzed	Ch 10-11		Original	Shuffled		Table Analyzed	Ch 10-11		Original	Shuffled		Table Analyzed	Ch 10-11		Original	Shuffled		Table Analyzed	Ch 10-11		Original	Shuffled		Table Analyzed	Ch 10-11
unit 1	0.157424	0.0174812					0.165484	0.0116523					0.23269	0.0117763					0.225741	0.00735688					0.296885	0.00494742					0.237772	0.00948612
unit 2	0.0226642	0.0240766		Column B	Shuffled		0.0488193	0.0125824		Column B	Shuffled		0.0227196	0.013365		Column B	Shuffled		0.0186334	0.00717976		Column B	Shuffled		0.0199244	0.0157941		Column B	Shuffled		0.0162643	0.0172819		Column B	Shuffled
unit 3	0.162381	0.0201457		vs.	vs.		0.174721	0.0127144		vs.	vs.		0.226195	0.0158801		vs.	vs.		0.225189	0.00579638		vs.	vs.		0.275424	0.0184998		vs.	vs.		0.235314	0.00894119		vs.	vs.
unit 4	0.262048	0.00663869		Column A	Original		0.271486	0.0114504		Column A	Original		0.274151	0.0119328		Column A	Original		0.238763	0.0146192		Column A	Original		0.272585	0.025173		Column A	Original		0.343908	0.019854		Column A	Original
unit 5	0.154108	0.00963195					0.150763	0.0125142					0.217314	0.00697933					0.21201	0.0148464					0.224125	0.0166609					0.170981	0.0106265
unit 6	0.0669074	0.00539176		Wilcoxon matched-pairs signed rank test			0.0405742	0.0147741		Wilcoxon matched-pairs signed rank test			0.0738331	0.00387938		Wilcoxon matched-pairs signed rank test			0.0589457	0.0231673		Wilcoxon matched-pairs signed rank test			0.0568553	0.00258332		Wilcoxon matched-pairs signed rank test			0.0693924	0.023187		Wilcoxon matched-pairs signed rank test
unit 7	0.097846	0.0209415		P value	<0.0001		0.072051	0.00702928		P value	<0.0001		0.0889291	0.0303972		P value	<0.0001		0.10769	0.00807322		P value	<0.0001		0.0822445	0.0164506		P value	<0.0001		0.13048	0.0205156		P value	<0.0001
unit 8	0.13754	0.0176902		Exact or approximate P value?	Exact		0.178746	0.0195737		Exact or approximate P value?	Exact		0.295353	0.0277183		Exact or approximate P value?	Exact		0.284696	0.0204103		Exact or approximate P value?	Exact		0.316357	0.0134757		Exact or approximate P value?	Exact		0.260734	0.00885725		Exact or approximate P value?	Exact
unit 9	0.110617	0.0307067		P value summary	****		0.105859	0.0145926		P value summary	****		0.0906714	0.00703431		P value summary	****		0.109362	0.00765945		P value summary	****		0.130597	0.022351		P value summary	****		0.116085	0.0173528		P value summary	****
unit 10	0.095628	0.0295694		Significantly different (P < 0.05)?	Yes		0.0844007	0.0163145		Significantly different (P < 0.05)?	Yes		0.126613	0.0250887		Significantly different (P < 0.05)?	Yes		0.123581	0.0306164		Significantly different (P < 0.05)?	Yes		0.154952	0.00439973		Significantly different (P < 0.05)?	Yes		0.146755	0.00856624		Significantly different (P < 0.05)?	Yes
unit 11	0.372367	0.0264095		One- or two-tailed P value?	Two-tailed		0.375288	0.0141215		One- or two-tailed P value?	Two-tailed		0.382413	0.0225854		One- or two-tailed P value?	Two-tailed		0.335616	0.0133426		One- or two-tailed P value?	Two-tailed		0.414457	0.0182922		One- or two-tailed P value?	Two-tailed		0.369691	0.00227214		One- or two-tailed P value?	Two-tailed
unit 12	0.0314979	0.0318622		Sum of positive, negative ranks	3.000 , -322.0		0.0479954	0.00688833		Sum of positive, negative ranks	2.000 , -323.0		0.00562007	0.0284635		Sum of positive, negative ranks	4.000 , -321.0		0.0362958	0.0116345		Sum of positive, negative ranks	0.000 , -325.0		0.0110505	0.0116447		Sum of positive, negative ranks	1.000 , -324.0		0.0317761	0.0146891		Sum of positive, negative ranks	1.000 , -324.0
unit 13	0.0543413	0.00868535		Sum of signed ranks (W)	-319		0.0162673	0.00349691		Sum of signed ranks (W)	-321		0.0454604	0.0365355		Sum of signed ranks (W)	-317		0.0189879	0.00344637		Sum of signed ranks (W)	-325		0.0399715	0.00936461		Sum of signed ranks (W)	-323		0.0698354	0.00967804		Sum of signed ranks (W)	-323
unit 14	0.0283481	0.0123704		Number of pairs	25		0.00646052	0.0297763		Number of pairs	25		0.0193871	0.00846783		Number of pairs	25		0.0398625	0.0123815		Number of pairs	25		0.0448457	0.016685		Number of pairs	25		0.0527229	0.0190922		Number of pairs	25
unit 15	0.420886	0.0178941		Number of ties (ignored)	0		0.323002	0.00150442		Number of ties (ignored)	0		0.223362	0.000792171		Number of ties (ignored)	0		0.213367	0.0147235		Number of ties (ignored)	0		0.268683	0.00388933		Number of ties (ignored)	0		0.499282	0.0104175		Number of ties (ignored)	0
unit 16	0.588244	0.0297514					0.444841	0.0142223					0.289578	0.0199196					0.245188	0.0381032					0.393856	0.0367506					0.700901	0.0491046
unit 17	0.313626	0.0150331		Median of differences			0.389869	0.00578247		Median of differences			0.19241	0.0149791		Median of differences			0.179781	0.00336679		Median of differences			0.310633	0.0126679		Median of differences			0.463908	0.00503393		Median of differences
unit 18	0.274227	0.0194601		Median	-0.1445		0.379634	0.00327228		Median	-0.222		0.235359	0.00499721		Median	-0.2209		0.228589	0.00933484		Median	-0.2106		0.349001	0.00466638		Median	-0.2919		0.533074	0.00933586		Median	-0.2519
unit 19	0.309377	0.0104076					0.401647	0.0141976					0.214823	0.0054073					0.215368	0.00480785					0.331777	0.0046655					0.490735	0.00858734
unit 20	0.432772	0.0243471		How effective was the pairing?			0.501796	0.00840338		How effective was the pairing?			0.255099	0.00538959		How effective was the pairing?			0.269436	0.00895932		How effective was the pairing?			0.410871	0.00550454		How effective was the pairing?			0.63457	0.00163806		How effective was the pairing?
unit 21	0.206582	0.0186249		rs (Spearman)	-0.08154		0.304971	0.0143562		rs (Spearman)	0.09846		0.326962	0.0264625		rs (Spearman)	-0.01		0.284484	0.022722		rs (Spearman)	0.4331		0.415801	0.0367897		rs (Spearman)	0.4715		0.299125	0.0347213		rs (Spearman)	-0.2108
unit 22	0.120181	0.0047956		P value (one tailed)	0.3492		0.235793	0.0138176		P value (one tailed)	0.3198		0.349158	0.0183899		P value (one tailed)	0.4811		0.360225	0.0179202		P value (one tailed)	0.0153		0.350336	0.0251198		P value (one tailed)	0.0087		0.233027	0.00920004		P value (one tailed)	0.1559
unit 23	0.348288	0.00402239		P value summary	ns		0.400963	0.0328347		P value summary	ns		0.41308	0.0107633		P value summary	ns		0.412186	0.0130684		P value summary	*		0.492732	0.0261758		P value summary	**		0.40705	0.0179953		P value summary	ns
unit 24	0.537582	0.00662775		Was the pairing significantly effective?	No		0.596048	0.0177524		Was the pairing significantly effective?	No		0.662456	0.0141557		Was the pairing significantly effective?	No		0.636508	0.0312748		Was the pairing significantly effective?	Yes		0.670783	0.0232954		Was the pairing significantly effective?	Yes		0.59132	0.0246492		Was the pairing significantly effective?	No
unit 25	0.4825	0.0114914					0.523845	0.019427					0.550674	0.00998779					0.549182	0.0130134					0.615843	0.0276585					0.526127	0.0084106

[truncated: 2 more sheets: Fig. S14 D,H,L,P,T,X, FigS15]
